# Supplementary material for: Saccharomyces cerevisiae adapted to grow in the presence of low-dose rapamycin exhibit altered amino acid metabolism
Source: Cell Commun Signal. 2018 Nov 20;16:85. doi: 10.1186/s12964-018-0298-y (PMC6245637; doi:10.1186/s12964-018-0298-y)
Supplement: Supplementary file 3 — Transcriptome and endometabolic profiles of air±pH ± cultures of yeast inoculated into 2 nM rapamycin-containing medium (.xlsx format, four worksheets including legend; gene expression profiles of rapamycin-treated and control cultures, the endometabolite profiles, and a summary of the significant Gene Ontology enrichments around the transcriptional changes identified provided in separate worksheets). (XLSX 893 kb) [file 12964_2018_298_MOESM3_ESM.xlsx]

## Sheet: info
Saccharomyces cerevisiae adapted to grow in the presence of low-dose rapamycin exhibit altered amino acid metabolism
Duygu Dikicioglua,b,c#, Elif Dereli Ekec*, Serpil Eraslanc**, Betul Kirdarc
a Department of Chemical Engineering and Biotechnology, University of Cambridge, Cambridge, United Kingdom
b Cambridge Systems Biology Centre, University of Cambridge, Cambridge, United Kingdom
c Department of Chemical Engineering, Bogazici University, Istanbul, Turkey
#Address correspondence to Duygu Dikicioglu, dd345@cam.ac.uk
Cellular and Molecular Life Sciences - Springer

## Sheet: legend
air+pH+:	dissolved oxygen controlled >90%, pH=5.5
air+pH-:	dissolved oxygen controlled >90%, pH monitored
air-pH+:	dissolved oxygen monitored, pH=5.5
air-pH-:	dissolved oxygen monitored, pH monitored
C1:	control replicate 1
C2:	control replicate 2
R1:	rapamycin-treated replicate 1
R2:	rapamycin-treated replicate 2
ORF:	open reading frame
d:	down-regulation in gene expression
u:	up-regulation in gene expression

## Sheet: transcriptome
control and treatment microarrays pre-processed and normalised together
ORF	air+pH+ C1	air+pH+ C2	air+pH-C1	air+pH-C2	air-pH+C1	air-pH+C2	air-pH-C1	air-pH-C2	air+pH+ R1	air+pH+ R2	air+pH-R1	air+pH-R2	air-pH+R1	air-pH+R2	air-pH-R1	air-pH-R2		control vs treatment, paired t-test (alpha =0.05), 1.5-fold change in expression											1-way ANOVA + Sidak's multiple comparisons test (alpha = 0.05)
YAL001C	7.75	7.99	7.66	7.83	8.19	7.92	7.92	7.98	7.88	7.96	7.83	7.87	8.29	8.14	7.93	7.96		all		air+		air-		pH+		pH-			air+pH+		air+pH-		air-pH+		air-pH-
YAL002W	7.32	7.69	7.08	7.17	7.79	7.53	7.5	7.35	7.89	7.37	6.72	6.52	7.44	7.39	7.37	7.3		ORF		ORF		ORF		ORF		ORF			ORF	Adjusted p-value	ORF	Adjusted p-value	ORF	Adjusted p-value	ORF	Adjusted p-value
YAL003W	12.61	12.63	12.5	12.52	12.41	12.51	12.38	12.47	12.53	12.67	12.58	12.61	12.44	12.53	12.43	12.46		YLR246W	d	YDL037C	d	YDR178W	d	YNL160W	d	YOL059W	d		YLR099W-A	0.0106	YPR200C	0.0348	YDL245C	0.0361	YLR026C	0.0202
YAL005C	11.81	12.15	11.28	11.53	11.75	11.69	11.31	11.36	12.12	11.92	11.41	11.26	11.62	11.8	11.51	11.41		YGR126W	d	YGR087C	d	YDR524W-A	d	YLR081W	d	YGL117W	d		YBL041W	0.0123	YLR245C	0.0273	YDL223C	0.0223	YEL065W	0.0478
YAL007C	9.42	9.17	9.69	9.81	9.52	9.78	9.84	9.81	9.21	9.34	9.88	9.83	9.17	9.33	9.84	9.79		YDL160C	d	YMR272C	d	YLR453C	d	YLL057C	d	YMR096W	d		YPR051W	0.0344	YOR344C	0.0212	YER157W	0.0407	YDR034W-B	0.0478
YAL008W	7.25	7.62	7.45	7.62	7.67	7.78	7.76	7.85	7.94	7.3	7.86	7.94	7.11	7.46	7.83	7.8		YCR084C	d	YGL009C	d	YHR097C	d	YOL151W	d	YHR071W	d		YOL077W-A	0.0198	YGR162W	0.05	YPL016W	0.0252	YKL120W	0.015
YAL009W	6.96	7.28	6.75	6.9	7.08	7.14	7.04	7.01	7.45	7.1	7.12	7.05	7.32	7.11	7.15	6.9		YOR140W	d	YBL112C	d	YDR034C-A	d	YPL130W	d	YLR453C	d		YDL067C	0.0231	YGL206C	0.0187	YMR206W	0.0407	YDR035W	0.0202
YAL010C	6.96	7.01	6.72	6.88	6.58	6.65	6.82	6.85	6.72	6.89	6.75	6.75	6.83	6.65	6.76	6.79		YDL001W	d	YOR083W	d	YKR102W	d	YGR087C	d	YJR109C	d		YPR200C	0.0491	YMR158C-A	0.05	YLR141W	0.0361	YHR022C	0.0111
YAL011W	6.7	6.5	6.68	6.42	6.36	5.98	6.15	6.17	6.19	6.63	6.41	6.49	6.72	6.64	6.15	6.18		YNR056C	d	YOL141W	d	YGR174C	d	YGR226C	d	YDR524W-A	d		YGL005C	0.0339	YJR111C	0.0273	YML054C-A	0.0457	YJR152W	0.0202
YAL012W	12.23	12.3	11.55	11.75	11.93	11.95	11.55	11.62	11.76	12.15	11.63	11.68	11.87	11.92	11.68	11.66		YCR068W	d	YER069W	d	YDR366C	d	YMR272C	d	YER069W	d		YDR234W	0.0221	YER048W-A	0.0165	YGL201C	0.0136	YOR389W	0.0391
YAL013W	8.07	8.3	7.79	7.89	8.12	8.01	7.89	7.92	7.68	8.02	7.59	7.69	7.99	8.03	7.97	7.84		YJR137C	d	YKL055C	d	YOL059W	d	YBL112C	d	YPL092W	d		YDR147W	0.0193	YNL262W	0.0127	YLR285C-A	0.0154	YMR321C	0.0142
YAL014C	8.8	8.92	8.67	8.68	9.2	9.04	8.8	8.8	9.33	8.87	8.6	8.78	9.04	9.16	8.9	8.8		YGR202C	d	YGR191W	d	YLL057C	d	YOR011W-A	d	YMR095C	d		YNL259C	0.0029	YGL071W	0.0322	YGL235W	0.0154	YJR130C	0.0142
YAL015C	6.96	6.67	6.61	6.71	6.92	7.15	6.7	6.53	7.29	6.59	6.59	6.68	6.85	6.86	6.53	6.45		YDR206W	d	YBR115C	d	YLR154W-F	d	YOR083W	d	YDL183C	d		YGL242C	0.0041	YPL016W	0.0148	YOR107W	0.0321	YBR256C	0.0142
YAL016C-B	6.72	7.1	6.19	6.55	7.1	7.09	6.98	6.78	7.17	6.67	6.74	6.92	7.48	7.25	6.74	6.81		YEL076C	d	YNL068C	d	YFL014W	d	YFL014W	d	YBL054W	d		YMR108W	0.0017	YGR045C	0.0129	YNL204C	0.0223	YMR011W	0.0232
YAL016W	9.45	9.55	9.57	9.66	9.34	9.49	9.67	9.61	9.4	9.29	9.59	9.4	9.38	9.26	9.49	9.51		YJR111C	d	YOR140W	d	YBR090C	d	YLL046C	d	YOL058W	d		YFL014W	0.0047	YER175C	0.0219	YER096W	0.0291	YGR161C	0.0277
YAL017W	8.14	8.54	8.01	8.42	8.71	8.41	8.43	8.46	8.32	8.07	8.37	8.28	8.76	8.74	8.4	8.39		YER087W	d	YHR097C	d	YEL025C	d	YEL076C-A	d	YDL160C	d		YIL022W	0.0069	YJR088C	0.0219	YGR109W-A	0.0261	YHR086W-A	0.016
YAL018C	3.58	3.26	3.58	3.86	3.84	3.12	3.69	3.92	3.55	3.43	3.68	3.78	3.5	3.54	3.94	3.79		YBL023C	d	YPL190C	d	YMR070W	d	YHR097C	d	YMR062C	d		YLL010C	0.0001	YLL027W	0.0113	YPL021W	0.021	YPL057C	0.0477
YAL019W	8.57	8.13	8.54	8.14	8.24	8.18	7.92	8	7.9	8.34	8.35	8.08	8.34	8.21	7.93	7.88		YGR183C	d	YCR081W	d	YLR026C	d	YBR220C	d	YOR204W	d		YGL202W	0.0001	YBR212W	0.0129	YBR132C	0.0401	YDR317W	0.0235
YAL020C	6.95	7.32	7.21	7.22	7.06	7.16	7.08	7.18	7.26	7.11	7.21	7.33	7.31	7.29	7.14	7.24		YJL078C	d	YJR147W	d	YHR022C	d	YGR273C	d	YGL125W	d		YCL044C	0.0001	YLR281C	0.0192	YJR078W	0.0134	YGR032W	0.0281
YAL021C	8.4	8.49	8.65	8.41	8.49	8.39	8.51	8.36	8.3	8.45	7.97	7.74	8.54	8.49	8.45	8.39		YGR266W	d	YKR103W	d	YOR302W	d	YOR344C	d	YJL088W	d		YOR302W	0.0005	YGR128C	0.0414	YKR063C	0.0261	YOL166W-A	0.0116
YAL022C	7.82	8.13	8.22	8.25	8.1	8.24	8.39	8.24	8.53	7.92	8.09	8.06	8.16	8.19	8.33	8.29		YLR213C	d	YEL046C	d	YLR285C-A	d	YOR302W	d	YOR337W	d		YHR200W	<0.0001	YGL194C	0.0192	YNL199C	0.0171	YJL056C	0.0209
YAL023C	10.7	10.88	10.74	10.68	11.09	10.84	10.72	10.77	10.65	10.82	10.47	10.39	11	11.14	10.83	10.79		YGR227W	d	YJR053W	d	YDL223C	d	YER153C	d	YGL009C	d		YDL222C	<0.0001	YML054C-A	0.0148	YNL269W	0.0496	YOL131W	0.0141
YAL024C	6.82	6.64	6.86	6.81	6.82	6.51	6.66	6.75	6.25	6.86	6.56	6.49	7.07	6.91	6.86	6.84		YBL107C	d	YDR384C	d	YLR070C	d	YKL055C	d	YGR097W	d		YCR097W	>0.9999	YDR510W	0.0249	YFL061W	0.0171	YGL009C	0.0037
YAL025C	9.27	9.08	8.94	8.55	8.22	8.73	7.74	7.79	8.28	9.26	8.68	8.83	8.47	8.19	7.42	7.31		YLR351C	u	YBR220C	d	YDL245C	d	YDL245C	d	YLR342W-A	d		YGR191W	>0.9999	YLR285C-A	0.0148	YKR075C	0.0109	YGR234W	0.0023
YAL026C	9.04	9	8.83	8.81	9.13	9.08	8.63	8.66	8.98	8.82	8.6	8.52	9.31	9.13	8.53	8.59		YDR079C-A	u	YIR034C	d	YMR206W	d	YBL072C	d	YDL140C	d		YLR246W	>0.9999	YPL032C	0.0113	YOR176W	0.041	YDL183C	0.0095
YAL027W	6.1	6.31	6.26	6.26	6.48	6	6.24	6.47	6.33	6.27	6.44	6.48	6.39	6.41	6.39	6.35		YLR310C	u	YOR344C	d	YLL019C	d	YCR068W	d	YMR108W	d		YJR011C	>0.9999	YLR264C-A	0.0414	YOR394W	0.0192	YDR524W-A	0.0031
YAL028W	5.78	6.65	4.89	5.64	7.04	6.49	6.47	6.48	7.07	5.99	5.59	5.36	6.79	7.08	6.47	6.66		YFL017W-A	u	YJR111C	d	YDR285W	d	YLL013C	d	YNL104C	d		YDL182W	>0.9999	YFL007W	0.0192	YDR322W	0.0154	YER175C	0.0012
YAL029C	9.67	9.51	9.31	9.14	9.64	9.3	9.16	9.01	9.42	9.77	8.93	8.81	9.85	9.68	9.12	9.05		YKL204W	u	YDL222C	d	YGR088W	d	YDR179C	u	YBR068C	d		YEL015W	>0.9999	YGR014W	0.0322	YLR178C	0.0324	YHR018C	0.0051
YAL030W	8.66	9.07	8.55	8.75	9.06	9.04	9.07	9.09	9.39	8.66	8.87	8.69	9.03	8.85	9.06	8.91		YDR169C-A	u	YKL205W	d	YMR096W	d	YGR233C	u	YGR191W	d		YLL013C	>0.9999	YNL327W	0.0469	YPR151C	0.0292	YPL168W	0.0019
YAL031C	7.4	7.91	6.89	7.31	7.86	7.66	7.4	7.22	7.85	7.48	6.91	6.95	7.63	7.84	7.41	7.27		YER030W	u	YOR030W	d	YDR384C	d	YDR076W	u	YBR115C	d		YOR261C	>0.9999	YML037C	0.0173	YBR285W	0.0264	YMR094W	0.0037
YAL032C	6.77	6.63	6.6	6.55	6.89	6.64	6.44	6.52	6.6	6.71	6.44	6.5	6.91	6.92	6.58	6.45		YLR292C	u	YGL066W	d	YML110C	d	YDR351W	u	YER024W	d		YHR044C	>0.9999	YMR133W	0.0343	YBL101W-C	0.0438	YHL040C	0.0019
YAL033W	7.26	7.05	7.66	7.59	7.2	7.34	7.51	7.51	7.46	7.3	7.96	8.12	7.59	7.64	7.54	7.5		YLR285W	u	YJR011C	u	YJL047C-A	d	YEL019C	u	YGL236C	d		YNL208W	>0.9999	YOR289W	0.0137	YJL144W	0.0156	YOR313C	0.0034
YAL034C	7.55	7.83	7.31	7.29	8.02	7.65	7.5	7.45	7.75	7.7	6.88	6.85	7.84	7.88	7.57	7.45		YER186C	u	YFL059W	u	YJR094C	d	YLR213C	u	YOR140W	d		YDL040C	>0.9999	YPL269W	0.0194	YAL037C-A	0.011	YOR008C-A	0.0011
YAL034W-A	6.39	5.96	6.11	6.25	6.25	6.09	5.86	6.1	6.07	6.52	6.35	6.44	6.24	6.3	6	6.24		YPL115C	u	YDR079C-A	u	YOR316C-A	d			YDR127W	d		YLL052C	>0.9999	YML082W	0.0307	YLR307W	0.0276	YPL019C	0.007
YAL035W	11.52	11.64	11.23	11.06	11.23	11.03	10.85	10.84	10.97	11.69	10.92	10.83	11.37	11.22	10.8	10.74		YKL154W	u	YDL181W	u	YLL013C	d			YNR044W	d		YDL246C	>0.9999	YLR278C	0.0137	YOR383C	0.0082	YGR243W	0.0049
YAL036C	10.27	10.32	10.26	9.94	9.76	10.09	9.54	9.44	10.22	10	9.93	10.06	9.6	9.71	9.42	9.35		YCR067C	u	YLR170C	u	YOR130C	d			YDR011W	d		YJR053W	>0.9999	YEL072W	0.0244	YCL018W	0.0011	YGR152C	0.0028
YAL037C-A	2.69	2.35	2.88	2.43	3.6	2.78	2.56	2.25	3.08	2.44	2.91	2.88	2.28	2.46	2.73	2.74		YML116W	u	YHR044C	u	YOR313C	u			YOL140W	d		YNR050C	>0.9999	YNR004W	0.0194	YOL007C	0.0082	YAL067W-A	0.0062
YAL037W	4.78	4.76	5.21	5.22	5.25	5.12	5.52	5.42	5.25	4.88	5.15	5.2	4.87	4.9	5.67	5.71		YLR047C	u	YPR200C	u	YEL065W	u			YJR154W	d		YDR305C	>0.9999	YLR162W	0.0274	YDR446W	0.0037	YML123C	0.0091
YAL038W	13.26	13.21	13.19	13.2	13.24	13.26	13.19	13.2	13.22	13.23	13.09	13.06	13.19	13.12	13.15	13.2		YDR312W	u	YNL259C	u	YLR053C	u			YLL013C	d		YNL287W	>0.9999	YMR259C	0.0257	YNR075C-A	0.0016	YPL277C	0.0023
YAL039C	8.13	8.68	8.04	8.05	8.66	8.89	8.25	8.07	9.05	8.5	8.13	8.08	8.53	8.79	8.4	8.5		YMR165C	u	YEL003W	u	YLL053C	u			YEL046C	d		YER052C	>0.9999	YOR363C	0.0103	YMR287C	0.0012	YOR348C	0.0034
YAL040C	9.26	9.62	8.95	9.08	10.03	9.6	9.31	9.2	9.74	9.27	8.38	8.24	9.36	9.49	9.39	9.22				YPR020W	u	YLL052C	u			YLR162W	d		YLL053C	>0.9999	YJL108C	0.0331	YML087C	0.0037	YPL273W	0.0028
YAL041W	7.85	7.77	7.79	7.82	7.8	7.79	7.71	7.74	7.78	7.67	7.66	7.59	7.99	7.79	7.68	7.73				YDR031W	u	YBR138C	u			YJR053W	d		YEL046C	>0.9999	YBR085C-A	0.0375	YOL067C	0.0072	YBR200W-A	0.0023
YAL042W	9.52	10.05	9.54	9.62	9.54	9.68	9.54	9.53	9.74	9.63	9.56	9.56	9.84	9.8	9.58	9.48				YOR040W	u	YMR299C	u			YDR384C	d		YOR098C	>0.9999	YER093C-A	0.0174	YOR008C	0.0055	YKL043W	0.0023
YAL043C	7.45	7.92	7.42	7.42	7.41	7.35	7.48	7.46	7.13	7.54	7.23	7.13	7.72	7.57	7.37	7.42				YCL048W	u	YLR141W	u			YHR018C	d		YDR320C-A	>0.9999	YGL073W	0.0199	YGR226C	0.0082	YBR056W-A	0.0043
YAL044C	10.25	10.56	11.07	10.9	10.82	10.8	11.17	11.37	11.05	10.5	11.19	11.08	11.06	11.23	11.35	11.3				YPL134C	u	YKR075C	u			YOR302W	d		YNL251C	>0.9999	YJL050W	0.0199	YOR255W	0.0012	YEL039C	0.0093
YAL044W-A	8.76	8.49	8.73	8.85	8.91	9.09	9.07	8.95	9.65	8.68	8.86	8.71	8.85	8.7	9.19	8.88				YLL052C	u	YNL144C	u			YMR094W	d		YGR126W	>0.9999	YOR009W	0.0375	YLR341W	0.0053	YCR018C	0.0095
YAL046C	7.32	7.62	7.55	7.69	7.41	7.88	7.89	7.77	8.17	7.42	7.97	7.97	7.52	7.56	7.81	7.67				YLR054C	u					YER073W	d		YPL169C	>0.9999	YJL130C	0.0174	YDR402C	0.0023	YGR079W	0.0042
YAL047C	6.36	5.63	6.05	6.11	6.19	5.99	5.78	5.84	5.85	6.43	5.88	5.66	6.39	6.16	5.78	5.79				YLL053C	u					YPL085W	d		YMR048W	>0.9999	YNR075W	0.0153	YHR014W	0.0029	YLR142W	0.0027
YAL048C	5.27	4.91	5.57	5.39	5.47	5.14	5.57	5.59	5.18	4.8	4.73	4.78	4.89	4.92	5.6	5.4				YPL095C	u					YIR034C	d		YDL160C	>0.9999	YGL230C	0.0174	YAL067W-A	0.0078	YBR220C	0.001
YAL049C	8.68	9.13	8.71	8.77	8.84	9.03	8.95	8.93	8.97	8.82	8.82	8.82	8.66	8.62	8.94	8.91				YEL059C-A	u					YBR043C	d		YBR166C	>0.9999	YPL085W	0.0154	YGR129W	0.0078	YEL025C	0.0002
YAL051W	7.43	7.34	7.69	7.52	7.6	7.51	7.59	7.59	7.96	7.26	7.1	7.03	7.35	7.19	7.65	7.48										YPR049C	d		YOR168W	>0.9999	YAL040C	0.0154	YIL157C	0.0024	YER073W	0.0005
YAL053W	9.09	9.02	9.13	9.01	8.72	8.79	9.05	8.9	9.79	9.23	8.61	8.54	8.58	8.62	9.09	9.04										YER096W	d		YDR315C	>0.9999	YBR072W	0.0106	YFL011W	0.001	YDL210W	0.0008
YAL054C	7.16	6.82	7.21	7.34	7.25	7.27	7.41	7.34	8.04	6.9	7.19	7.09	7.02	7.25	7.4	7.36										YHR165C	d		YHL031C	>0.9999	YHL048C-A	0.0473	YHR086W-A	0.0049	YIR032C	0.0006
YAL055W	7.74	7.98	7.05	7.39	7.99	7.79	7.11	7.18	7.72	7.93	7.52	7.65	7.9	8.19	7.23	7.33										YLL027W	d		YBR233W-A	0.9995	YHR022C-A	0.0199	YDR504C	0.0038	YOR130C	0.0004
YAL056W	8.09	8.43	7.61	7.95	8.47	8.2	8.07	8.03	8.38	8.03	7.75	7.82	8.21	8.32	8.07	7.94										YLR285C-A	d		YMR065W	>0.9999	YPL056C	0.0309	YBL005W-A	0.0097	YDR281C	0.0001
YAL058W	7.41	7.78	7.26	7.28	7.16	7.57	7.24	7.23	7.89	7.43	7.11	7.17	7.14	7.16	7.33	7.23										YJR111C	d		YNL265C	>0.9999	YGL121C	0.0426	YPL036W	0.0038	YDR046C	0.0003
YAL059W	8.66	8.85	8.92	8.4	8.11	8.44	8.03	8	8.31	8.84	8.61	8.63	8.33	8.09	7.89	7.72										YLR430W	d		YCR084C	>0.9999	YBR147W	0.0101	YOR178C	0.0013	YOL084W	0.0007
YAL060W	9.65	10.23	9.98	9.95	10.14	10.22	10.18	9.88	10.41	9.58	10.03	9.9	10.01	10.52	9.87	10.05										YMR259C	d		YLR154W-F	>0.9999	YNR064C	0.0473	YOL052C-A	0.0059	YNR064C	0.0001
YAL061W	6.39	8.31	6	7.25	8.45	8.3	7.6	7.78	7.41	6.59	6.92	6.78	7.6	8.59	7.46	7.58										YDR034C-A	d		YGL009C	>0.9999	YIL077C	0.0101	YNL279W	0.0053	YPL278C	0.0002
YAL062W	5.77	6.47	4.94	5.19	5.37	5.57	4.92	5.04	10.3	6.22	5.44	5.5	5.26	5.6	6.54	5.81										YDR342C	d		YOL059W	>0.9999	YDL171C	0.013	YGL162W	0.0086	YHR136C	0.0007
YAL063C	7.24	7.38	7.11	6.97	7.85	7.41	7.22	7.18	8.11	7.45	6.63	6.64	7.69	7.52	7.22	7.24										YDL222C	d		YLR351C	0.8825	YHR165C	0.013	YHR092C	0.0068	YOL104C	0.0008
YAL063C-A	4.45	4.56	4.31	4.19	4.85	4.45	4.61	4.41	4.68	4.44	4.43	4.07	4.37	4.24	4.55	4.54										YNL327W	d		YOL141W	>0.9999	YIL011W	0.0114	YKL055C	0.0003	YKR075C	0.0002
YAL064C-A	2.33	2.48	2.24	2.15	2.33	0.95	1.59	2.11	1.9	2.19	2.64	2.16	2.24	2.52	1.34	1.71										YBR249C	d		YDR125C	>0.9999	YLR430W	0.0169	YLR213C	0.0002	YDR342C	0.0004
YAL064W	3.68	3.54	4.34	2.81	5.17	4.98	4.48	3.48	5.67	3.36	2.77	2.88	3.2	2.97	4.01	3.99										YKL205W	d		YLR429W	>0.9999	YER169W	0.013	YOR083W	0.0002	YCR021C	0.0007
YAL064W-B	3.29	3.98	3.52	3.2	3.76	3.12	2.95	3.19	3.22	3.62	3.34	3.72	3.92	4.08	3.21	3.28										YGR110W	d		YKL061W	>0.9999	YJL109C	0.0365	YEL019C	0.0009	YLR121C	0.0001
YAL065C	2.32	2.46	2.37	2.16	2.9	2.15	1.83	2.51	2.14	2.85	2.3	2.25	2.2	2.73	2.23	2.24										YOR108W	d		YPL202C	>0.9999	YEL069C	0.022	YDL159W-A	0.0003	YOR387C	0.0002
YAL067C	7.22	7.89	6.09	7.1	5.74	6.27	6.24	6.44	7.27	6.99	6.57	7.04	5.37	5.38	6.47	6.2										YOR303W	d		YLR245C	>0.9999	YLL066W-B	0.0176	YER153C	0.0001	YFL014W	<0.0001
YAL067W-A	3.29	2.8	3.01	1.57	4.75	3.13	2.25	2.27	3.38	2.91	2.27	1.84	2.97	3.1	1.81	1.62										YDR046C	d		YLR355C	>0.9999	YML131W	0.0308	YPL103C	0.0002	YOR302W	<0.0001
YAL068C	5.61	5.73	5.42	5.36	6.31	5.31	5.51	5.76	5.9	5.62	5.23	5.3	5.9	5.63	5.91	5.95										YOR130C	d		YDR422C	>0.9999	YHR140W	0.0407	YHR177W	0.0007	YLL052C	<0.0001
YAR002C-A	10.14	10.22	10.28	10.39	10.51	10.58	10.45	10.43	10.47	10.19	10.39	10.35	10.2	10.23	10.48	10.58										YKL120W	d		YOR140W	>0.9999	YDR247W	0.0231	YDL072C	0.0005	YLL053C	<0.0001
YAR002W	9.12	9.11	9.17	8.89	8.98	8.93	8.81	8.83	8.73	9.06	8.79	8.78	9.15	9.02	8.79	8.84										YDR035W	d		YDR384C	>0.9999	YDR317W	0.0163	YOL144W	0.0006	YLL057C	<0.0001
YAR003W	6.67	6.54	6.89	7.15	6.91	6.86	7.04	7.09	6.61	6.6	7.17	7.04	6.78	6.81	7.14	7.06										YPL278C	u		YKR102W	>0.9999	YPR020W	0.0127	YER093C-A	0.0006	YIR042C	<0.0001
YAR007C	9.16	8.97	8.95	9.21	9.23	9.23	9.13	9.15	9.21	9.36	9.1	8.96	8.99	9.17	9.18	9.27										YLL053C	u		YOR014W	>0.9999	YDL184C	0.0144	YGL262W	0.0009	YHR097C	<0.0001
YAR008W	7.56	7.14	7.48	7.5	7.3	7.44	7.31	7.47	7.35	7.65	7.5	7.57	7.37	7.23	7.47	7.47										YAL062W	u		YJR154W	>0.9999	YCR090C	0.0163	YCR046C	0.0005	YMR096W	<0.0001
YAR009C	9.3	8.26	8.3	8.45	8.8	8.79	7.97	8.31	9.22	9.13	8.23	7.99	9.05	7.82	7.89	7.96										YGL005C	u		YPL134C	>0.9999	YJL116C	0.0121	YBR068C	0.0007	YJR109C	<0.0001
YAR010C	12.05	11.82	10.41	10.41	11.98	11.46	10.13	10.26	12.01	11.98	10.22	10.35	11.49	11.47	10.53	10.45										YDR079C-A	u		YBL112C	>0.9999	YPR151C	0.0197	YPR156C	0.0004	YHR071W	<0.0001
YAR014C	8.73	8.35	8.69	8.47	8.37	8.33	8.41	8.4	8.54	8.55	8.12	8.1	8.61	8.31	8.36	8.35										YFL059W	u		YCR095C	>0.9999	YOR164C	0.0251	YBR298C-A	0.0003	YER069W	<0.0001
YAR015W	11.19	11.22	11.42	11.33	11.49	11.56	11.47	11.58	11.4	11.29	11.27	11.24	11.69	11.69	11.54	11.54										YJR011C	u		YNL217W	>0.9999	YGR154C	0.0356	YNL092W	0.0002	YLR053C	<0.0001
YAR018C	7.54	7.51	7.7	7.45	7.6	7.53	7.73	7.56	7.55	7.1	7.58	7.62	7.93	7.54	7.5	7.44										YMR299C	u		YIR042C	0.9908	YGL051W	0.0317	YPR007C	0.0002	YJL214W	<0.0001
YAR019C	6.96	7.37	6.94	6.97	7.23	6.77	6.94	6.98	7.25	7.13	6.67	6.71	7.41	7.2	6.94	6.85										YDL181W	u		YPR129W	>0.9999	YLR121C	0.0257	YKR093W	0.0005	YOL058W	<0.0001
YAR020C	4.69	5.61	5.16	5.44	5.65	5.14	5.38	5.68	5.44	5.68	5.23	5.09	5.64	5.71	5.59	5.67										YOL108C	u		YKR068C	>0.9999	YBR183W	0.0423	YDR070C	0.0005	YPL250C	<0.0001
YAR023C	4.74	5.12	4.47	4.61	5.06	4.88	4.72	4.64	5.09	4.79	4.48	4.59	5.08	5.09	4.88	4.7										YOR389W	u		YER040W	>0.9999	YNL318C	0.0118	YFL014W	<0.0001	YGL117W	<0.0001
YAR027W	7.95	7.96	7.98	8.42	8.32	8.47	8.66	8.69	8.34	7.94	8.7	8.6	8.15	8.51	8.74	8.72										YHR044C	u		YGL066W	>0.9999	YNL259C	0.0098	YOR302W	<0.0001	YMR062C	<0.0001
YAR028W	6.78	7.14	6.97	6.97	7.17	7.25	7.37	7.35	7.62	6.73	7.18	7.22	7.09	7.39	7.66	7.56										YLR307C-A	u		YJR045C	>0.9999	YOR302W	0.0075	YDL160C	<0.0001	YJL088W	<0.0001
YAR029W	4.97	4.62	5.16	5.18	5.59	5.41	5.22	5.39	5.59	5.09	4.82	4.7	5.3	5.48	5.7	5.48										YOR382W	u		YML011C	>0.9999	YLL013C	0.005	YLR154W-F	<0.0001	YMR095C	<0.0001
YAR031W	4.79	5.05	4.89	4.83	5.37	5.45	4.7	5.19	4.91	5	5.19	5.09	5.11	5.24	5.26	5.25										YPL277C	u		YNL068C	>0.9999	YLL052C	0.0098	YOL059W	<0.0001	YOR108W	<0.0001
YAR033W	6.49	6.38	6.28	6.37	6.63	6.68	6.25	6.56	6.46	6.31	6.62	6.6	6.36	6.46	6.6	6.57										YPL277C	u		YDR037W	>0.9999	YJR053W	0.0058	YLR081W	<0.0001	YKR034W	<0.0001
YAR033W	5.05	5.24	5.2	5.3	5.25	5.55	5.29	5.55	4.71	5.26	5.74	5.61	4.98	5.45	5.39	5.36										YDR146C	u		YPR046W	>0.9999	YEL046C	0.005	YLL057C	<0.0001	YAL062W	<0.0001
YAR035C-A	3.94	4.35	4.14	3.81	4	3.75	4.42	4.25	6.47	3.52	3.96	3.95	4.09	4.2	4.23	4.09										YPR200C	u		YMR314W	>0.9999	YOR140W	0.0011	YKR102W	<0.0001	YGL184C	<0.0001
YAR035W	6.69	7.44	6.85	6.54	6.72	6.78	6.83	6.84	9.39	7.2	6.52	6.54	6.68	6.78	7.18	6.97										YLR245C	u		YBR268W	>0.9999	YDR384C	0.0066	YBL112C	<0.0001	YCR098C	<0.0001
YAR042W	8.05	8.29	7.82	7.51	7.97	7.86	7.55	7.56	8.04	8.09	7.19	7.34	8.19	8.12	7.55	7.57										YHL040C	u		YER070W	>0.9999	YJR154W	0.0038	YLR026C	<0.0001	YLR136C	<0.0001
YAR050W	4.53	4.64	4.64	4.52	5.16	4.45	4.56	4.61	4.81	4.52	4.08	4.13	4.47	4.47	4.68	4.66										YLL052C	u		YCL030C	>0.9999	YIR042C	0.0029	YLR453C	<0.0001	YOL140W	<0.0001
YAR064W	2.89	3.73	2.63	2.7	3.66	2.52	2.45	2.52	2.32	3.18	2.3	2.47	3.11	3.28	2.32	2.22										YNL259C	u		YER008C	>0.9999	YBR220C	0.0075	YOR344C	<0.0001	YJL153C	<0.0001
YAR066W	3.03	2.99	3.18	2.56	3.42	2.55	2.7	2.38	2.74	2.93	2.85	2.96	2.81	3.07	2.4	2.91										YML131W	u		YDR079C-A	>0.9999	YJR147W	0.0022	YEL076C-A	<0.0001	YOR303W	<0.0001
YAR068W	5.07	5.14	5.21	4.66	4.94	4.98	4.67	4.73	4.37	5.25	4.86	4.83	5.1	4.51	4.49	4.18										YIR042C	u		YNL220W	0.9999	YPL190C	0.0017	YBR220C	<0.0001	YPL054W	<0.0001
YAR071W	9.83	8.49	10.33	9.78	7.19	8.5	7.66	9.51	8.83	9.65	9.57	9.65	8.47	7.82	8.98	9.58										YGR142W	u		YGR041W	0.9987	YLR187W	0.0025	YEL076C	<0.0001	YBR069C	<0.0001
YAR073W	11.26	11.36	9.89	10.77	11.59	11.81	10.89	9.98	9.91	11.3	10.84	10.56	11.15	11.38	10.07	10.18										YOR040W	u		YCR076C	>0.9999	YHR097C	0.0011	YOL151W	<0.0001	YDR034C-A	<0.0001
YAR075W	12.88	12.97	12.42	12.66	12.98	13.01	12.65	12.33	12.37	13.01	12.54	12.54	12.94	12.85	12.3	12.34										YCL026C-B	u		YOR258W	>0.9999	YIR034C	0.0098	YHR097C	<0.0001	YJR078W	<0.0001
YAR075W	1.71	3.21	1.55	1.61	3.1	2.53	1.41	2.1	1.55	3.18	1.83	1.55	3.06	3.22	0.98	1.6													YKL055C	>0.9999	YAL048C	0.005	YGR273C	<0.0001	YBR068C	<0.0001
YBL001C	9.46	9.58	9.21	9.51	9.99	10.16	9.79	9.64	10.65	9.82	9.69	9.77	9.93	9.99	9.64	9.51													YNL066W	>0.9999	YKR103W	0.0029	YMR070W	<0.0001	YBR072W	<0.0001
YBL002W	11.72	11.43	11.41	11.63	11.35	11.52	11.4	11.44	11.05	11.75	11.68	11.6	11.39	11.25	11.54	11.52													YLR026C	>0.9999	YER073W	0.0086	YMR272C	<0.0001	YMR251W	<0.0001
YBL003C	11.29	11.17	10.89	11.22	11.08	11.25	11.06	10.97	10.98	11.27	11.36	11.36	11.18	11.18	11.1	11.05													YFL022C	>0.9999	YPL256C	0.0044	YPL130W	<0.0001	YBR093C	<0.0001
YBL003C	12.46	12.28	12.18	12.33	12.26	12.33	12.2	12.27	12.15	12.49	12.38	12.4	12.34	12.34	12.28	12.28													YBR188C	>0.9999	YNR044W	0.0017	YEL025C	<0.0001	YGL121C	<0.0001
YBL004W	9.6	9.76	9.43	9.19	9.32	9.17	8.75	8.68	8.94	9.91	8.99	8.8	9.82	9.65	8.56	8.45													YNL104C	>0.9999	YGL047W	0.0075	YGR087C	<0.0001	YDR366C	<0.0001
YBL005W	6.41	6.77	6.3	6.23	6.36	6.22	6.25	6.21	6.28	6.34	5.79	5.61	6.52	6.25	6.14	6.27													YPR089W	>0.9999	YGL131C	0.0098	YDL106C	<0.0001	YBR147W	<0.0001
YBL005W-A	8.58	7.36	7.03	7.17	7.97	7.52	6.04	6.33	8.46	7.84	5.99	6.3	6.6	7.13	6.82	6.85													YDL084W	>0.9999	YGR189C	0.0032	YMR315W-A	<0.0001	YGL188C-A	<0.0001
YBL006C	8.11	7.94	7.9	8.1	8.43	8.35	8.21	8.08	8.54	7.83	8.18	8.25	8.03	8.14	8.17	8.09													YKL058W	>0.9999	YDR443C	0.0049	YBR090C	<0.0001	YLR157W-C	<0.0001
YBL007C	9.42	9.52	9.48	9.56	9.39	9.18	9.36	9.49	9.16	9.48	9.4	9.31	9.4	9.34	9.35	9.43													YGL008C	>0.9999	YPR049C	0.0098	YNL160W	<0.0001	YFL061W	<0.0001
YBL008W	7.77	7.96	7.61	7.3	7.63	7.4	7.28	7.3	7.83	7.83	7.19	7.24	7.85	7.61	7.34	7.27													YLR453C	>0.9999	YBR129C	0.0032	YLL066W-B	<0.0001	YBL005W-A	<0.0001
YBL008W-A	2.57	2.22	2.58	2.59	3.11	2.36	2.1	2.32	1.91	2.76	2.52	2.71	2.53	2.66	2.05	1.95													YLR310C	>0.9999	YOL091W	0.0057	YBL054W	<0.0001	YOL154W	<0.0001
YBL009W	7.75	7.05	7.71	7.57	7.13	7.25	7.15	7.33	6.8	7.61	7.47	7.56	7.62	7.48	7.16	7.31													YDL245C	>0.9999	YHR018C	0.0037	YOR011W-A	<0.0001	YEL021W	<0.0001
YBL010C	6.71	6.2	6.47	6.54	6.53	6.68	6.51	6.53	6.31	6.49	6.53	6.45	6.47	6.37	6.55	6.58													YER091C	>0.9999	YCR108C	0.0013	YGL240W	<0.0001	YCL026C-B	<0.0001
YBL011W	8.54	8.96	8.47	8.71	8.94	8.75	8.43	8.3	8.84	8.66	8.42	8.46	8.89	8.87	8.48	8.33													YGR201C	>0.9999	YCR089W	0.0021	YJL214W	<0.0001	YAR071W	<0.0001
YBL013W	3.49	4.33	3.16	3.2	4.13	3.45	3.12	3.52	3.63	3.4	3.22	3.46	3.83	4.44	2.99	3.42													YJR106W	>0.9999	YGL201C	0.0098	YFR032C	<0.0001	YEL035C	<0.0001
YBL014C	7.81	7.58	7.93	7.52	7.22	7.08	7.22	7.29	7.38	7.82	7.51	7.53	7.96	7.59	7.21	7.11													YOL042W	>0.9999	YGR224W	0.0065	YNL144C	<0.0001	YBL101W-C	<0.0001
YBL015W	9.25	10.02	8.63	9.26	9.24	9.38	8.81	8.69	10.68	9.15	8.88	8.89	8.71	9.26	8.94	8.73													YOR344C	>0.9999	YMR094W	0.0037	YOR384W	<0.0001	YEL021W	<0.0001
YBL016W	3.43	4.08	3.05	3.1	3.51	3.47	3.17	3.3	3.07	3.67	3	3.23	3.55	3.54	3.09	3.19													YIL014W	>0.9999	YOL069W	0.0021	YJL047C	<0.0001	YMR058W	<0.0001
YBL017C	9.5	9.61	9.37	9.43	9.6	9.37	9.58	9.49	9.52	9.29	8.95	8.76	9.62	9.43	9.44	9.35													YGR218W	>0.9999	YEL003W	0.0037	YBR072C-A	<0.0001	YBL074C	<0.0001
YBL018C	8.64	8.83	8.22	8.4	8.17	8.44	8.07	7.94	8.65	8.92	8.68	8.85	8.71	8.61	8.05	8.06													YEL076C-A	>0.9999	YAL021C	0.0098	YFL012W	<0.0001	YLR099W-A	>0.9999
YBL019W	6.28	6.29	5.96	6.19	6.39	6.36	6.33	6.23	6.7	6.18	6.23	6.28	6.37	6.36	6.3	6.23													YOR089C	>0.9999	YGL184C	0.0021	YOR060C	<0.0001	YBL041W	>0.9999
YBL020W	7.98	8	8.02	7.91	7.65	8	7.88	7.91	8.09	7.87	7.73	7.53	7.74	7.59	7.95	7.85													YPL147W	>0.9999	YCR081W	0.0095	YDR524W-A	<0.0001	YPR051W	>0.9999
YBL021C	6.74	6.51	7.08	6.88	6.61	6.6	6.83	6.94	7.15	6.55	6.8	6.88	6.53	6.55	6.93	6.89													YDL001W	>0.9999	YBR182C-A	0.0095	YKL132C	<0.0001	YOL077W-A	>0.9999
YBL022C	9.2	9.3	8.9	8.93	8.97	8.93	8.78	8.79	8.99	9.3	8.89	8.7	9.22	9	8.69	8.65													YNR056C	>0.9999	YLR136C	0.0013	YFL051C	<0.0001	YDL067C	>0.9999
YBL023C	8.17	8.43	8.23	8.2	8.35	8.06	8.3	8.32	8.08	8.18	8.02	8.02	8.25	8.12	8.2	8.21													YJL200C	>0.9999	YOL140W	0.0012	YJR151W-A	<0.0001	YPR200C	>0.9999
YBL024W	10.33	10.25	10.41	10.15	9.97	10.14	9.83	9.86	10.07	10.41	9.94	9.95	10.24	10.12	9.7	9.67													YML101C	>0.9999	YOL166W-A	0.0011	YDR034W-B	<0.0001	YGL005C	>0.9999
YBL025W	5.97	6.04	6.22	6.31	5.67	5.92	6.26	6.3	5.78	5.88	6.68	6.74	5.59	5.69	6.38	6.29													YGR162W	>0.9999	YOL144W	0.0078	YDR178W	<0.0001	YDR234W	>0.9999
YBL026W	9.79	10.36	9.65	9.83	9.7	9.79	9.81	9.73	9.77	9.96	10.15	10.17	10.4	10.2	9.74	9.77													YJL052W	>0.9999	YEL021W	0.0068	YER060W-A	<0.0001	YDR147W	>0.9999
YBL027W	11.65	11.7	11.91	11.97	11.61	11.66	11.94	11.94	11.62	11.64	12.08	12.05	11.45	11.59	11.89	11.83													YCR068W	>0.9999	YLR466C-B	0.0011	YLR233C	<0.0001	YNL259C	>0.9999
YBL028C	8.81	8.41	8.73	8.35	8.39	8.77	8.06	7.83	8.82	9.15	8.9	9.05	8.94	8.87	7.8	7.69													YBR220C	>0.9999	YDL195W	0.0078	YBR212W	<0.0001	YGL242C	>0.9999
YBL029C-A	7.64	7.92	7.74	7.89	8.26	8.51	8.44	8.2	8.23	7.89	8.02	7.92	8.22	8.45	8.26	8.25													YJR147W	>0.9999	YJL198W	0.0025	YFL067W	<0.0001	YMR108W	>0.9999
YBL029W	6.82	7.08	7.06	6.68	8.69	8.43	7.78	7.95	6.6	7.27	7.25	6.86	8.63	8.67	8.04	7.98													YLR346C	>0.9999	YBR069C	0.0025	YPL168W	<0.0001	YIL022W	>0.9999
YBL030C	12.02	12.26	11.95	12.02	11.99	11.98	11.88	11.92	12.05	12.1	11.88	11.88	11.82	12.08	11.95	11.93													YFL017W-A	>0.9999	YER188C-A	0.0016	YLR030W	<0.0001	YLL010C	>0.9999
YBL031W	6.57	6.03	6.3	6.35	6.43	6.38	6.2	6.33	5.83	6.72	6.4	6.49	6.7	6.57	6.36	6.38													YJR137C	>0.9999	YOL032W	0.0068	YER106W	<0.0001	YGL202W	>0.9999
YBL032W	9.03	9.26	9.74	9.58	8.98	8.95	9.38	9.63	8.74	9.05	9.61	9.67	9.16	9.27	9.51	9.68													YGR202C	>0.9999	YBR043C	0.0078	YGR140W	<0.0001	YCL044C	>0.9999
YBL033C	7.73	8.42	8.15	8.15	8.02	7.98	8.31	7.97	8.53	7.88	8.14	8.16	8.15	8.16	7.98	7.99													YDR206W	>0.9999	YDR409W	0.0034	YJL136W-A	<0.0001	YHR200W	>0.9999
YBL034C	7.82	7.91	7.86	7.84	8.23	7.73	7.95	7.91	7.68	7.98	7.38	7.4	8.13	7.94	7.88	7.8													YEL076C	>0.9999	YPL095C	0.0045	YJL191W	<0.0001	YDL222C	0.8653
YBL035C	7.94	7.61	7.64	7.77	7.71	7.81	7.73	7.72	7.61	7.93	7.82	7.77	7.68	7.72	7.7	7.77													YKL204W	>0.9999	YGL236C	0.0017	YMR133W	<0.0001	YCR097W	>0.9999
YBL036C	9.13	9.23	8.9	8.92	9.1	9.15	8.87	8.81	9.1	9.18	9.11	9.11	9.24	9.15	8.8	8.9													YJL019W	>0.9999	YBL090W	0.0019	YHR022C	<0.0001	YGR191W	>0.9999
YBL037W	7.33	7.78	7.46	7.6	7.25	7.15	7.47	7.44	7.17	7.47	7.59	7.67	7.82	7.65	7.37	7.38													YIR022W	>0.9999	YDR127W	0.0022	YOL024W	<0.0001	YLR246W	>0.9999
YBL038W	8.06	7.95	8	8.2	8.14	8.35	8.27	8.21	8.28	8.05	8.41	8.42	7.98	8.15	8.12	8.15													YPL190C	>0.9999	YAL064W	0.0049	YMR192W	<0.0001	YJR011C	>0.9999
YBL039C	10.19	9.94	10.56	10.04	9.18	9.66	9.54	9.55	9.27	10.13	10.04	9.93	9.67	9.4	9.22	9.21													YCR075W-A	>0.9999	YLL066W-B	0.0021	YDR146C	<0.0001	YDL182W	0.4195
YBL039W-A	6.88	7.39	6.52	7.06	7.13	7.35	7.34	7.15	7.87	7.25	7.21	7.18	7.15	7.25	7.42	7.35													YKL205W	>0.9999	YPL277C	0.0025	YOL149W	<0.0001	YEL015W	>0.9999
YBL040C	9.11	9.18	9.15	9.36	9.68	9.77	9.45	9.29	9.83	9.02	9.43	9.52	9.48	9.6	9.48	9.49													YDR062W	>0.9999	YDR374C	0.0087	YIL102C	<0.0001	YLL013C	>0.9999
YBL041W	9.79	9.79	9.86	9.89	9.97	9.88	9.82	9.88	9.96	10.03	10.08	10.03	10.16	10.22	9.97	10													YHR024C	>0.9999	YLR120C	0.007	YCR101C	<0.0001	YOR261C	>0.9999
YBL042C	9.1	9.63	9.95	9.15	9.99	10.21	9.57	9.38	10.38	8.89	8.95	8.97	10.29	10.27	9.51	9.47													YLR187W	>0.9999	YIR017C	0.002	YLL046C	<0.0001	YHR044C	>0.9999
YBL043W	3.91	4.3	4.78	4.82	4.65	4.24	5.01	4.56	4.44	4.27	4.55	4.92	4.17	4.12	4.75	4.32													YNL044W	>0.9999	YKR075C	0.0099	YGL007C-A	<0.0001	YNL208W	>0.9999
YBL044W	3.11	3.07	3.62	2.98	4.08	3.55	3.16	3.47	3.39	3.25	3.17	3.22	3.01	3.26	3.6	3.66													YOR316C-A	>0.9999	YBL071C-B	0.0011	YNR004W	<0.0001	YDL040C	>0.9999
YBL045C	11.16	11.19	10.72	10.98	11.1	11.14	10.63	10.7	11.17	11.16	10.86	10.9	10.91	11.05	10.79	10.7													YFR003C	>0.9999	YGL263W	0.0062	YLR162W	<0.0001	YDL246C	>0.9999
YBL046W	7.57	7.62	7.39	7.34	7.48	7.33	7.23	7.35	7.14	7.77	7.47	7.51	7.81	7.77	7.29	7.29													YJR058C	>0.9999	YGR142W	0.0048	YFL040W	<0.0001	YJR053W	>0.9999
YBL047C	9.91	10.17	9.52	9.85	10.31	9.97	9.62	9.7	10.07	10.31	9.49	9.27	10.36	10.25	9.68	9.65													YGR054W	>0.9999	YFL020C	0.0059	YEL021W	<0.0001	YNR050C	>0.9999
YBL049W	4.05	4.18	3.87	3.9	4.67	4.25	3.88	3.74	6.37	4.14	3.96	4.01	4.03	4.28	4.43	4.04													YDR169C-A	>0.9999	YDR171W	0.0073	YMR182C	<0.0001	YDR305C	>0.9999
YBL050W	8.21	8.67	8.75	8.8	8.78	8.9	8.93	8.88	8.82	8.2	9.1	8.99	8.3	8.64	8.93	8.92													YHR143W	>0.9999	YFR057W	0.0083	YGR286C	<0.0001	YNL287W	>0.9999
YBL051C	10	9.81	9.96	9.72	10.43	10.18	9.79	9.85	10.13	9.92	9.34	9.27	10.12	10.09	9.92	9.87													YER125W	>0.9999	YGL255W	0.0045	YLR127C	<0.0001	YER052C	0.1769
YBL052C	8.16	7.98	7.42	7.75	8.07	7.85	7.32	7.27	7.9	8.1	7.56	7.64	8.33	8.06	7.37	7.29													YHR097C	>0.9999	YGR191W	0.0002	YCR045C	<0.0001	YEL046C	0.8653
YBL054W	8.93	7.75	9.28	8.49	8.19	8.49	8.42	8.52	8.69	8.45	7.83	7.73	7.07	6.46	8.26	8.21													YER090W	>0.9999	YOL141W	0.0002	YNR066C	<0.0001	YOR098C	>0.9999
YBL055C	7.42	7.37	7.79	7.28	6.51	6.81	7.01	6.95	7.39	7.37	7.44	7.34	6.78	6.65	6.8	6.88													YLR262C-A	>0.9999	YNL068C	0.0007	YHR021W-A	<0.0001	YDR320C-A	>0.9999
YBL056W	8.98	8.95	9.2	9.18	9.14	9.33	9.03	9.15	8.94	8.77	9.17	8.87	9.16	9.18	9.17	9.19													YIR034C	>0.9999	YBR115C	0.0002	YDR034C-A	<0.0001	YNL251C	>0.9999
YBL057C	8.02	8.03	7.95	8.06	7.78	8.1	8.07	8	8.08	7.89	8.28	8.25	7.82	7.85	8.01	7.92													YGR273C	>0.9999	YDR031W	0.0001	YGL256W	<0.0001	YGR126W	>0.9999
YBL058W	9.83	10.28	9.5	9.83	10.03	9.94	9.73	9.76	10.03	9.97	9.81	9.81	10.14	10.27	9.86	9.8													YGL206C	>0.9999	YJL078C	0.0002	YNL195C	<0.0001	YPL169C	>0.9999
YBL059C-A	6.93	7.07	6.83	7.04	7.03	7.35	7.25	7.01	6.99	7.29	7.49	7.43	7.24	7.24	7.05	6.99													YEL032W	>0.9999	YDL037C	0.0008	YCL042W	<0.0001	YMR048W	>0.9999
YBL059W	6.06	6.12	5.87	6.15	6.09	6.36	6.03	5.96	6.53	6.52	6.17	6.21	6.15	6.15	6.18	6.02													YGR240C	>0.9999	YLL066W-B	0.0001	YGL258W	<0.0001	YDL160C	>0.9999
YBL060W	5.33	5.38	5.24	5.15	5.2	5.27	5	4.98	5.54	5.39	5.05	5.11	5.46	5.16	5.04	4.96													YPL133C	>0.9999	YBL081W	0.0009	YLR154C-H	<0.0001	YBR166C	>0.9999
YBL061C	8.95	8.69	8.43	8.3	8.62	8.72	8.18	8.25	9.38	8.86	8.13	8.27	8.94	8.51	8.09	8.15													YHR032W	>0.9999	YDR011W	0.0008	YAL064W	<0.0001	YOR168W	>0.9999
YBL063W	6.59	6.13	6.56	6.59	6.56	6.28	6.45	6.61	6.26	6.65	6.44	6.31	6.8	6.67	6.63	6.76													YER030W	>0.9999	YFL012W	0.0007	YGL114W	<0.0001	YDR315C	>0.9999
YBL064C	7.7	8.25	7.82	8.16	8	8.09	8.47	8.34	8.92	7.84	8.4	8.3	7.55	7.89	8.46	8.39									u				YPL034W	>0.9999	YKL070W	0.0004	YLR214W	<0.0001	YHL031C	>0.9999
YBL066C	6.71	6.46	6.48	6.63	6.64	6.31	6.43	6.29	6.85	6.37	5.56	5.47	5.79	5.74	6.55	6.25									u				YHR108W	>0.9999	YOR060C	0.0005	YGR152C	<0.0001	YBR233W-A	>0.9999
YBL067C	7.92	7.58	7.7	7.55	7.4	7.46	7.53	7.6	7.55	7.69	7.59	7.55	7.43	7.26	7.4	7.38									u				YMR070W	>0.9999	YFL067W	0.0005	YLL006W-A	<0.0001	YMR065W	>0.9999
YBL068W	9.15	9.4	9.49	9.15	8.54	8.95	8.89	8.87	9.04	9.2	9.27	9.29	8.85	8.67	8.76	8.86									u				YLR387C	>0.9999	YBR138C	0.0001	YBR221W-A	<0.0001	YNL265C	>0.9999
YBL069W	7.69	7.82	8.22	7.85	7.12	7.51	7.71	7.92	7.66	7.58	7.84	7.92	7.36	7.33	7.77	7.73									u				YHR039C-A	>0.9999	YBR145W	0.0005	YDL227C	<0.0001	YCR084C	>0.9999
YBL071C-B	2.24	2.48	2.61	2.15	3.09	2.23	2.57	2.35	1.82	2.74	3.14	3.37	2.23	2.78	2.52	2.18									u				YGL085W	>0.9999	YBR055C	0.0001	YOR072W-B	<0.0001	YLR154W-F	>0.9999
YBL071W-A	8.06	8.45	8.35	7.93	7.41	7.83	7.61	7.52	7.85	8.2	8.23	8.28	7.96	7.89	7.53	7.44													YLR292C	>0.9999	YML087C	0.0001	YDR366C	<0.0001	YOL059W	>0.9999
YBL072C	11.9	11.87	12.07	12.19	11.85	11.95	12.23	12.22	11.86	11.25	12.13	12.02	11.14	11.24	12.24	12.17													YML038C	>0.9999	YOR040W	0.001	YIL077C	<0.0001	YLR351C	>0.9999
YBL072C	12.63	12.74	12.71	12.77	12.56	12.67	12.78	12.72	12.66	12.61	12.78	12.75	12.54	12.59	12.79	12.69													YDR395W	>0.9999	YNL204C	0.0004	YHR079C-A	<0.0001	YOL141W	>0.9999
YBL074C	4.1	4.5	3.75	3.95	4.42	4.13	8	3.7	3.53	4.81	4.64	5.04	5.27	5.71	3.73	3.64													YMR272C	>0.9999	YJR115W	0.0002	YMR286W	<0.0001	YDR125C	>0.9999
YBL075C	7.47	7.85	7.72	7.63	7.75	7.67	7.34	7.67	7.79	7.52	7.4	7.49	7.64	7.87	7.6	7.52													YBR115C	>0.9999	YER037W	0.0002	YGR174C	<0.0001	YLR429W	>0.9999
YBL076C	11.2	11.34	11.27	11.2	11.09	11.06	11.16	11.09	10.91	11.16	10.87	10.73	11.36	11.31	10.99	10.9													YOR222W	>0.9999	YKL029C	0.0005	YGL188C-A	<0.0001	YKL061W	>0.9999
YBL078C	8.11	8.65	6.99	7.85	8.69	8.55	8.17	8.32	9.36	7.96	7.82	7.9	7.96	8.28	8.54	8.56													YBR162C	>0.9999	YNR066C	0.0001	YPL171C	<0.0001	YPL202C	>0.9999
YBL079W	8.83	8.7	8.8	8.64	8.6	8.57	8.6	8.51	8.51	8.86	8.47	8.06	9	8.61	8.29	8.34													YOR113W	>0.9999	YLR466C-B	0.0002	YBR005W	<0.0001	YLR245C	>0.9999
YBL080C	5.33	5.43	4.95	5.41	5.47	5.18	5.43	5.5	5	5.49	5.7	5.38	5.87	5.77	5.28	5.48													YMR158C-A	>0.9999	YBR068C	0.0003	YBR040W	<0.0001	YLR355C	>0.9999
YBL081W	7.86	7.69	8.09	7.52	7.41	7.5	7.29	7.24	7.17	7.97	7.02	7.02	7.45	7.06	7.17	7.09													YOR368W	>0.9999	YLR342W-A	0.0001	YKL128C	<0.0001	YLR081W	>0.9999
YBL082C	8.05	8.8	8.23	8.08	8.07	8.14	8.05	8.12	7.82	8.29	8.12	8.21	8.45	8.32	8.09	8.14													YOR030W	>0.9999	YGL114W	0.0005	YNL042W-B	<0.0001	YDR422C	>0.9999
YBL084C	7.14	7.29	7.18	7.23	7.44	7.13	7.29	7.27	7.14	7.22	7.05	7.01	7.49	7.43	7.25	7.1													YDR275W	>0.9999	YER024W	0.0005	YOL154W	<0.0001	YOR140W	>0.9999
YBL085W	8.5	8.17	8.17	8.35	8.69	8.38	8.12	8.2	8.19	8.45	8.09	8.01	8.38	8.29	8.15	8.23													YHR205W	>0.9999	YGR152C	0.0001	YDR317W	<0.0001	YDR384C	0.1992
YBL086C	6.02	6.37	5.82	6.23	7.03	6.77	6.52	6.45	6.75	6.3	5.7	5.65	6.83	7.14	6.36	6.43													YMR240C	>0.9999	YBL005W-A	0.0001	YFR012W-A	<0.0001	YKR102W	>0.9999
YBL087C	11.58	11.9	11.75	11.71	11.75	11.76	11.7	11.77	11.53	11.68	11.9	11.91	11.6	11.71	11.81	11.79													YPL179W	>0.9999	YMR107W	0.0001	YOR387C	<0.0001	YOR014W	>0.9999
YBL088C	7.11	7.4	6.76	6.77	7.62	7.28	6.8	6.75	7.4	7.3	6.42	6.23	7.38	7.33	6.84	6.75													YOR141C	>0.9999	YLR094C	0.0004	YMR322C	<0.0001	YJR154W	>0.9999
YBL089W	7.3	7.52	7.43	7.45	7.55	7.52	7.59	7.55	7.51	7.45	7.39	7.22	7.75	7.61	7.55	7.43													YDR119W	>0.9999	YHL009W-A	0.0002	YBL074C	<0.0001	YPL134C	0.9972
YBL090W	6.48	6.72	6.49	6.71	6.51	6.9	6.69	6.76	6.64	6.57	7.36	7.41	6.57	6.76	6.56	6.58													YMR277W	>0.9999	YMR108W	<0.0001	YLR099W-A	>0.9999	YBL112C	>0.9999
YBL091C	9.46	9.58	9.45	9.44	9.3	9.39	9.47	9.48	9.23	9.31	9.51	9.42	9.28	9.35	9.49	9.43													YNL127W	>0.9999	YDL160C	<0.0001	YBL041W	>0.9999	YCR095C	>0.9999
YBL091C-A	6.69	6.87	6.74	6.86	7.24	7.34	7.23	7.16	7.13	6.75	7.08	7.08	7.01	7.35	7.36	7.28													YDL181W	>0.9999	YGL009C	<0.0001	YPR051W	>0.9999	YNL217W	>0.9999
YBL092W	12.49	12.46	12.56	12.57	12.49	12.47	12.57	12.58	12.39	12.6	12.65	12.6	12.52	12.51	12.58	12.53													YHR084W	>0.9999	YOL059W	<0.0001	YOL077W-A	>0.9999	YPR129W	>0.9999
YBL093C	8.04	8.01	7.91	7.54	7.75	7.86	7.54	7.54	8.76	8.23	7.87	7.89	7.81	7.83	7.57	7.55													YDR486C	>0.9999	YKR102W	<0.0001	YDL067C	>0.9999	YKR068C	>0.9999
YBL095W	7.93	8.34	7.96	8.08	8.25	8.28	8.42	8.35	8.27	8.18	8.3	8.2	8.56	8.56	8.47	8.46													YJR111C	>0.9999	YBL112C	<0.0001	YPR200C	>0.9999	YER040W	>0.9999
YBL097W	4.91	4.53	4.85	4.67	4.53	4.51	4.31	4.47	3.79	4.72	4.39	4.54	4.94	4.82	4.45	4.51													YAL038W	0.9822	YKL055C	<0.0001	YGL005C	>0.9999	YGL066W	>0.9999
YBL098W	7.72	8.38	9.14	8.89	8.73	8.52	9.81	9.4	8.72	8.3	9.41	9.25	8.28	8.28	9.62	9.78													YLR285W	>0.9999	YNL104C	<0.0001	YDR234W	>0.9999	YJR045C	>0.9999
YBL099W	12.53	12.59	12.29	12.37	12.45	12.51	12.26	12.28	12.63	12.45	12.12	12.1	12.12	12.23	12.36	12.29													YNR060W	0.9908	YLR453C	<0.0001	YDR147W	>0.9999	YML011C	>0.9999
YBL101C	8.44	8.83	8.45	8.44	9.09	8.73	8.77	8.64	9.14	8.29	7.9	7.74	8.82	8.71	8.63	8.61													YMR096W	>0.9999	YEL076C-A	<0.0001	YNL259C	>0.9999	YNL068C	>0.9999
YBL101W-A	9.33	8.85	7.63	7.27	9.71	8.3	6.4	6.58	7.73	9.95	8.6	9.4	9.16	8.94	6.1	6.51													YHR174W	>0.9999	YEL076C	<0.0001	YGL242C	>0.9999	YDR037W	>0.9999
YBL101W-B	11.53	11.2	10.6	10.83	11.36	11.19	10.54	10.64	11.4	11.35	10.49	10.42	10.97	10.89	10.61	10.41													YPL130W	>0.9999	YOL151W	<0.0001	YMR108W	>0.9999	YPR046W	>0.9999
YBL101W-C	2.32	2.33	2.61	2.38	2.31	1.81	1.44	2.65	2.5	2.26	1.62	2.61	2.75	3.09	1.48	1													YKR009C	>0.9999	YMR070W	<0.0001	YIL022W	>0.9999	YMR314W	>0.9999
YBL102W	8.91	9.4	9.07	9.41	9.62	9.64	9.59	9.39	9.55	9.12	9.46	9.56	9.61	9.68	9.41	9.36													YOR293C-A	>0.9999	YMR272C	<0.0001	YLL010C	>0.9999	YBR268W	>0.9999
YBL103C	7.15	7.03	7.12	7.15	6.99	6.8	7.21	7.05	6.82	7.01	7.12	7.09	7.45	7.36	6.91	6.94													YEL025C	>0.9999	YMR096W	<0.0001	YGL202W	>0.9999	YER070W	>0.9999
YBL104C	7.79	7.83	7.71	7.71	7.74	7.47	7.61	7.59	7.58	7.83	7.59	7.6	7.96	7.94	7.65	7.58													YFR032C-A	>0.9999	YJR109C	<0.0001	YCL044C	>0.9999	YCL030C	>0.9999
YBL105C	8.27	8.59	8.13	8.06	8.33	8.24	8.13	8.15	8.1	8.51	7.9	7.87	8.64	8.46	8.11	8.16													YLR083C	>0.9999	YDL223C	<0.0001	YHR200W	>0.9999	YER008C	>0.9999
YBL106C	6.19	6.44	5.47	5.54	5.77	5.42	5.25	5.4	7.02	6.24	5.19	5.12	6.11	5.78	5.15	5.09													YJR109C	>0.9999	YDL106C	<0.0001	YDL222C	0.0645	YDR079C-A	>0.9999
YBL107C	7.91	7.67	7.63	7.68	8.1	8.05	7.75	7.82	8.07	8.1	7.96	7.93	8.26	8.12	7.85	7.8													YKR098C	>0.9999	YHR071W	<0.0001	YCR097W	>0.9999	YNL220W	>0.9999
YBL108C-A	6.82	6.92	6.75	6.9	7.7	7.21	6.79	6.92	7.67	6.91	6.54	6.71	6.84	6.86	7.1	7.02													YBR217W	>0.9999	YBL066C	<0.0001	YGR191W	>0.9999	YGR041W	>0.9999
YBL111C	9.5	10.39	8.46	9.13	10.24	9.86	8.95	8.91	9.95	9.5	8.94	8.74	10.06	10.16	9.01	8.94													YDR372C	>0.9999	YER069W	<0.0001	YLR246W	>0.9999	YCR076C	>0.9999
YBL112C	7.65	7.61	7.39	7.71	8.27	8.06	7.59	7.52	7.51	6.39	6.24	6.17	6.79	6.95	7.81	7.75													YDR031W	>0.9999	YBL054W	<0.0001	YJR011C	>0.9999	YOR258W	>0.9999
YBL113C	11.09	11.64	10.49	10.67	11.45	11.19	10.64	10.7	11.33	11.34	10.42	10.22	11.19	11.27	10.77	10.68													YHR207C	>0.9999	YOR083W	<0.0001	YDL182W	>0.9999	YKL055C	>0.9999
YBR001C	7.68	8.2	7.62	7.96	8.08	7.96	8.01	8.03	8.11	7.69	7.94	7.88	7.87	7.92	7.95	7.97													YER089C	>0.9999	YOR394C-A	<0.0001	YEL015W	>0.9999	YNL066W	>0.9999
YBR002C	7.93	8.07	7.88	7.65	7.64	7.62	7.54	7.47	7.67	8.07	8.01	8.22	7.78	7.72	7.37	7.37													YNR052C	>0.9999	YGL240W	<0.0001	YLL013C	0.4853	YFL022C	>0.9999
YBR003W	7.6	8.18	8	8.27	8.19	8.13	8.42	8.4	7.89	7.64	8.29	8.25	8.01	8.27	8.44	8.37													YHR073W	>0.9999	YJL214W	<0.0001	YOR261C	>0.9999	YBR188C	>0.9999
YBR004C	8.04	7.88	8.38	7.96	7.8	7.87	8	7.81	8.03	8.16	7.83	7.93	7.84	7.88	7.86	7.93													YKR083C	>0.9999	YNL124W	<0.0001	YHR044C	>0.9999	YNL104C	>0.9999
YBR005W	6.67	6.31	7.53	6.91	7.33	8.42	7.54	7.03	9.24	6.35	6.45	6.8	5.92	6.08	7.37	7.1													YDR403W	>0.9999	YFR032C	<0.0001	YNL208W	>0.9999	YPR089W	>0.9999
YBR006W	7.28	7.29	6.5	6.82	7.78	7.73	7.04	7.08	8.26	7.23	7.02	6.9	8.06	7.92	7.47	7.24													YKL211C	>0.9999	YOL058W	<0.0001	YDL040C	>0.9999	YDL084W	>0.9999
YBR007C	8.12	7.7	7.73	7.5	8.38	8.02	7.75	7.92	8.16	7.99	7.46	7.34	8.7	8.4	8.01	7.91													YMR145C	>0.9999	YDL183C	<0.0001	YLL052C	>0.9999	YKL058W	>0.9999
YBR008C	6.86	7.06	6.76	6.73	6.79	6.73	6.62	6.7	6.95	6.86	6.51	6.61	6.96	6.91	6.8	6.87													YER186C	>0.9999	YJL047C	<0.0001	YDL246C	>0.9999	YGL008C	>0.9999
YBR009C	12.16	11.86	11.84	12.03	12.06	12.14	11.88	11.93	12.03	12.2	12.11	12.1	12.1	12.06	11.92	11.88													YDL223C	0.1159	YGL125W	<0.0001	YJR053W	>0.9999	YLR453C	>0.9999
YBR010W	11.63	11.71	11.33	11.56	11.57	11.66	11.49	11.49	11.43	11.77	11.75	11.72	11.47	11.55	11.63	11.55													YJL139C	>0.9999	YBR072C-A	<0.0001	YNR050C	>0.9999	YLR310C	>0.9999
YBR011C	12.64	12.87	12.51	12.56	12.54	12.56	12.55	12.62	12.59	12.58	12.5	12.47	12.45	12.54	12.62	12.59													YLR389C	>0.9999	YGL117W	<0.0001	YDR305C	>0.9999	YDL245C	>0.9999
YBR013C	5.53	5.88	6.26	6.43	5.9	6.26	6.64	6.45	6.27	5.64	6.77	6.77	5.74	5.87	6.58	6.4													YGR087C	>0.9999	YCL048W	<0.0001	YNL287W	>0.9999	YER091C	>0.9999
YBR014C	8.21	8.08	8.46	8.66	8.19	8.44	8.68	8.77	8.11	7.98	8.9	8.92	7.68	8.06	8.71	8.76													YOR122C	>0.9999	YEL065W	<0.0001	YER052C	>0.9999	YGR201C	>0.9999
YBR015C	8.93	9.13	9.38	9.24	8.93	9.04	9.16	9.29	8.72	8.86	9.17	8.94	9.25	9.14	9.21	9.21													YER087W	>0.9999	YDR524W-A	<0.0001	YLL053C	>0.9999	YJR106W	>0.9999
YBR016W	10.84	11.21	10.21	10.29	10.85	10.75	10.16	10.21	10.87	10.89	10.13	10.13	10.94	10.93	10.26	10.26													YMR115W	>0.9999	YKL132C	<0.0001	YEL046C	>0.9999	YOL042W	>0.9999
YBR017C	9.75	9.84	9.48	9.35	9.56	9.59	9.32	9.28	9.43	9.54	9.18	9.13	9.6	9.45	9.21	9.22													YKL168C	>0.9999	YOR337W	<0.0001	YOR098C	>0.9999	YOR344C	>0.9999
YBR018C	3.98	3.97	3.64	3.77	4.95	4.89	4.19	4.21	4.49	3.78	3.58	3.51	4.07	4.3	4.28	4.32													YGL030W	>0.9999	YMR062C	<0.0001	YDR320C-A	>0.9999	YIL014W	>0.9999
YBR019C	3.75	4.21	3.25	3.58	4.53	4.5	4.13	3.76	4.82	3.9	3.79	3.68	4.4	4.11	3.93	3.71													YHR114W	>0.9999	YJR151W-A	<0.0001	YNL251C	0.6657	YGR218W	>0.9999
YBR020W	5.22	6.01	5.32	5.36	6.11	5.6	5.57	5.59	6.09	5.79	4.93	4.84	5.86	5.82	5.71	5.64													YDR373W	>0.9999	YJL088W	<0.0001	YGR126W	0.9547	YEL076C-A	>0.9999
YBR021W	6.95	7.17	7.41	7.14	6.85	6.97	7.17	7.16	6.77	7.07	6.74	6.73	7.19	7.2	7.05	7.13													YOL005C	>0.9999	YDR034W-B	<0.0001	YPL169C	>0.9999	YOR089C	>0.9999
YBR022W	6.66	7.03	6.82	6.93	6.88	7.22	7.13	7.12	7.22	6.75	7.39	7.29	6.88	6.96	7.31	7.32													YGR153W	>0.9999	YER060W-A	<0.0001	YMR048W	>0.9999	YPL147W	>0.9999
YBR023C	8.68	8.81	8.93	8.85	8.64	8.5	8.99	8.93	8.81	8.57	8.72	8.66	8.83	8.75	8.94	9													YNL330C	>0.9999	YIL138C	<0.0001	YBR166C	>0.9999	YDL001W	>0.9999
YBR024W	7.42	7.47	7.03	7.17	7.79	7.98	7.38	7.31	7.82	7.33	7.25	7.19	7.28	7.53	7.48	7.46													YLR091W	>0.9999	YGR097W	<0.0001	YOR168W	>0.9999	YNR056C	>0.9999
YBR025C	11.77	12.18	11.57	11.65	11.47	11.55	11.49	11.58	11.14	11.87	11.76	11.79	11.63	11.69	11.57	11.64													YPL254W	>0.9999	YLR233C	<0.0001	YDR315C	>0.9999	YJL200C	>0.9999
YBR026C	8.26	8.51	8.27	8.55	8.41	8.54	8.61	8.74	8.69	8.3	9.01	8.88	8.21	8.49	8.64	8.68													YOL108C	>0.9999	YMR095C	<0.0001	YHL031C	>0.9999	YML101C	>0.9999
YBR028C	7.9	7.65	8.01	7.86	8.05	7.76	7.8	7.98	7.15	8.01	7.96	7.9	8.18	8.01	7.83	7.88													YBL023C	>0.9999	YLR030W	<0.0001	YBR233W-A	>0.9999	YGR162W	>0.9999
YBR029C	9.71	9.54	9.65	9.56	9.08	9.24	9.11	9.32	9.29	9.39	9.4	9.37	9.11	8.94	9.19	9.21													YPR043W	>0.9999	YGR140W	<0.0001	YMR065W	0.9997	YJL052W	>0.9999
YBR030W	7.47	7.62	7.57	7.34	7.04	7.37	7.16	7.25	7.37	7.28	7.17	7.1	7.13	6.92	7.28	7.26													YGR063C	>0.9999	YJL136W-A	<0.0001	YNL265C	>0.9999	YCR068W	>0.9999
YBR031W	12.74	12.79	12.8	12.72	12.67	12.71	12.71	12.73	12.62	12.74	12.66	12.69	12.67	12.7	12.73	12.71													YMR309C	>0.9999	YOR204W	<0.0001	YCR084C	>0.9999	YJR147W	>0.9999
YBR033W	4.45	5.26	3.93	4.43	4.97	4.54	4.5	4.7	5.3	4.9	4.6	4.63	4.94	4.99	4.82	4.76													YOR336W	>0.9999	YOL149W	<0.0001	YGL009C	>0.9999	YLR346C	>0.9999
YBR034C	9.32	9.52	9.87	9.15	8.27	8.95	8.63	8.53	8.94	9.59	9.33	9.49	8.88	8.56	8.33	8.25													YNL149C	>0.9999	YIL102C	<0.0001	YLR351C	>0.9999	YFL017W-A	>0.9999
YBR035C	8.92	9.38	9.49	9.5	9.27	9.41	9.9	9.63	9.34	8.88	9.51	9.52	9.25	9.2	9.58	9.38													YKL156W	0.6442	YBR238C	<0.0001	YOL141W	0.1244	YJR137C	>0.9999
YBR036C	8.98	9.31	9.55	9.59	9.38	9.5	9.77	9.65	9.54	9.01	9.5	9.49	9.32	9.45	9.72	9.68													YER157W	>0.9999	YCR101C	<0.0001	YDR125C	>0.9999	YGR202C	>0.9999
YBR037C	6.39	6.84	6.48	6.96	7.12	7.3	7.36	7.23	7.08	6.39	6.83	6.81	6.72	7.05	7.34	7.29													YJR143C	>0.9999	YBR296C	<0.0001	YLR429W	>0.9999	YDR206W	>0.9999
YBR038W	7.32	8.04	7.58	7.67	7.46	7.37	7.53	7.45	6.81	7.52	7.64	7.58	7.82	7.81	7.59	7.63													YOR260W	>0.9999	YGL007C-A	<0.0001	YKL061W	>0.9999	YEL076C	>0.9999
YBR039W	10.84	10.99	10.69	11.1	10.69	10.72	10.96	10.88	11.11	11.1	11.21	11.24	10.41	10.81	11.1	10.98													YGR212W	>0.9999	YLR413W	<0.0001	YPL202C	>0.9999	YKL204W	>0.9999
YBR040W	3.89	3.44	4.07	3.43	4.93	4.74	4.17	3.82	4.62	3.67	3.84	3.87	3.62	3.72	4.15	3.97													YDL106C	>0.9999	YFL040W	<0.0001	YLR245C	0.9547	YJL019W	>0.9999
YBR041W	7.83	8.3	8.6	8.65	8.21	8.03	8.66	8.76	8.06	7.97	8.4	8.36	8.31	8.22	8.63	8.73													YGL189C	>0.9999	YDL140C	<0.0001	YLR355C	>0.9999	YIR022W	>0.9999
YBR042C	7.67	7.33	7.53	7.68	7.21	7.5	7.4	7.48	7.51	7.69	7.95	7.91	7.19	7.18	7.49	7.53													YOL130W	>0.9999	YGR043C	<0.0001	YDR422C	>0.9999	YPL190C	>0.9999
YBR043C	7.61	7.57	8.55	8.33	7.93	7.82	8.99	8.41	8.12	7.37	7.68	7.82	7.93	7.9	8.44	8.04													YOR342C	>0.9999	YMR182C	<0.0001	YOR140W	>0.9999	YCR075W-A	>0.9999
YBR044C	7.16	7.2	7.04	7.13	7.54	7.39	7.41	7.46	7.48	7.09	6.97	6.89	7.5	7.51	7.44	7.41													YDR522C	>0.9999	YGL006W-A	<0.0001	YDR384C	0.2273	YKL205W	>0.9999
YBR045C	4.58	5.08	4.47	4.46	5.46	4.76	4.62	4.81	4.91	5.11	4.89	4.97	5.16	4.85	4.69	4.76													YGR183C	>0.9999	YPL092W	<0.0001	YOR014W	>0.9999	YDR062W	>0.9999
YBR046C	6.25	6.46	7.3	7.27	7.07	7.14	7.85	7.84	7.75	6.29	7.43	7.27	6.55	6.81	7.82	7.64													YJL078C	>0.9999	YGL262W	<0.0001	YJR154W	>0.9999	YHR024C	>0.9999
YBR047W	3.9	4.07	4.98	5	5.05	4.29	6.4	5.72	6.57	4.11	4.81	4.76	4.55	4.9	5.96	5.55													YGR266W	>0.9999	YCR045C	<0.0001	YPL134C	>0.9999	YLR187W	>0.9999
YBR048W	12.22	12.1	12.33	12.28	12.19	12.27	12.32	12.31	12.2	12.22	12.27	12.3	12.11	12.16	12.32	12.26													YHR067W	>0.9999	YHR014W	<0.0001	YCR095C	>0.9999	YNL044W	>0.9999
YBR048W	11.25	11.52	11.69	11.55	11.23	11.25	11.53	11.65	10.95	11.37	11.71	11.68	11.43	11.38	11.68	11.66													YCR071C	>0.9999	YER064C	<0.0001	YNL217W	>0.9999	YOR316C-A	>0.9999
YBR049C	7.83	7.72	7.94	7.87	7.67	7.66	7.72	7.77	7.46	7.74	7.74	7.76	7.87	7.83	7.61	7.62													YDR226W	>0.9999	YNL195C	<0.0001	YIR042C	0.801	YFR003C	>0.9999
YBR050C	4.83	5	4.89	4.76	4.51	4.69	4.66	4.72	5.55	5.12	4.56	4.58	4.6	4.45	5	5.16													YLL018C	>0.9999	YLL006W-A	<0.0001	YPR129W	0.8579	YJR058C	>0.9999
YBR052C	9.13	9.75	9.01	9.34	9.83	9.87	9.74	9.76	9.98	9.25	9.61	9.57	9.55	9.84	9.8	9.82													YMR315W-A	>0.9999	YDL227C	<0.0001	YKR068C	>0.9999	YGR054W	>0.9999
YBR053C	7.86	8.29	8.19	8.46	8.45	8.52	8.7	8.64	8.65	7.83	8.77	8.59	8.11	8.47	8.73	8.67													YLR213C	>0.9999	YMR011W	<0.0001	YER040W	>0.9999	YDR169C-A	0.9917
YBR054W	7.96	8.8	7.52	8.78	9.09	8.62	9.66	9.3	8.83	7.83	8.69	8.51	8.13	9.05	9.81	9.38													YAL048C	>0.9999	YGL188C-A	<0.0001	YGL066W	>0.9999	YHR143W	>0.9999
YBR055C	8.12	8.13	8.7	7.77	8.48	8.06	7.95	8	8.31	7.9	7.4	7.42	7.79	7.75	8.09	8.38													YOL027C	>0.9999	YGL033W	<0.0001	YJR045C	>0.9999	YER125W	>0.9999
YBR056W	7.59	8.32	7.61	8.14	8.36	8.53	8.39	8.41	8.49	7.77	8.39	8.29	8.06	8.36	8.5	8.48													YAL016W	>0.9999	YOR072W-B	<0.0001	YML011C	>0.9999	YOL151W	>0.9999
YBR056W-A	5.12	5.07	6.8	6.47	5.21	4.92	7.61	7.43	5.5	5.24	6.9	7.22	5.15	5.17	8.04	8.11													YHR071W	>0.9999	YPR158W	<0.0001	YNL068C	>0.9999	YER090W	0.956
YBR057C	7.41	7.35	7.31	7.58	7.5	7.37	7.24	7.41	7.11	7.45	7.77	7.65	7.77	7.83	7.25	7.41													YOL026C	>0.9999	YPL171C	<0.0001	YDR037W	>0.9999	YLR262C-A	>0.9999
YBR058C	8.36	8.17	8.43	8.27	7.93	8.07	8.28	8.24	8.27	8.18	8.19	8.15	8.24	8.11	8.27	8.25													YOR246C	>0.9999	YOR381W-A	<0.0001	YPR046W	>0.9999	YIR034C	0.2505
YBR058C-A	9.67	9.67	9.24	9.53	9.79	10	9.59	9.48	10.16	9.84	9.51	9.54	9.69	9.59	9.51	9.41													YLR082C	>0.9999	YFL061W	<0.0001	YMR314W	>0.9999	YGR273C	>0.9999
YBR059C	8.65	8.9	8.1	8.41	9.14	8.7	8.53	8.44	8.89	8.57	7.96	7.81	8.83	8.84	8.52	8.48													YLR010C	>0.9999	YKR093W	<0.0001	YBR268W	>0.9999	YGL206C	>0.9999
YBR060C	8.37	8.6	8.38	8.18	8.04	7.86	8.13	8.17	7.73	8.33	8.07	7.97	8.19	8.08	8.07	7.98													YPL115C	>0.9999	YDR504C	<0.0001	YER070W	0.9998	YEL032W	>0.9999
YBR061C	8.22	8.13	8.26	8.02	7.71	7.95	7.7	7.79	7.54	8.26	8.12	8.11	7.69	7.67	7.71	7.59													YPR042C	>0.9999	YCL001W-B	<0.0001	YCL030C	>0.9999	YGR240C	>0.9999
YBR062C	7.75	7.99	7.4	7.72	8.06	8.16	7.86	7.86	8.51	7.73	7.93	8.02	7.73	7.89	7.99	7.96													YCL032W	>0.9999	YOL154W	<0.0001	YER008C	>0.9999	YPL133C	>0.9999
YBR063C	8.13	8.15	8.03	7.61	8.17	7.95	7.92	7.76	8.21	7.91	7.49	7.52	8.2	7.92	7.77	7.69													YGL136C	>0.9999	YEL021W	<0.0001	YDR079C-A	>0.9999	YHR032W	>0.9999
YBR065C	6.06	5.77	5.9	5.58	6.02	5.82	5.46	5.47	5.9	5.97	5.95	6.18	6.32	6.25	5.31	5.29													YKR103W	>0.9999	YCL026C-B	<0.0001	YNL220W	>0.9999	YER030W	>0.9999
YBR066C	8.55	8.65	7.4	8.26	8.97	8.92	7.91	7.99	9.44	8.4	8.25	8.17	8.67	9.13	8.23	8.38													YKL154W	>0.9999	YBL101W-A	<0.0001	YGR041W	>0.9999	YPL034W	>0.9999
YBR067C	11.61	11.88	11.33	11.29	11.51	11.3	11.19	11.13	12.75	11.52	11.16	11.13	10.62	11.08	11.35	11.06													YLR288C	>0.9999	YEL021W	<0.0001	YCR076C	>0.9999	YHR108W	>0.9999
YBR068C	8.29	8.19	9.82	9.41	6.05	7.31	9.36	8.81	8.42	8.28	8.78	8.76	5.78	5.6	8.18	8.07													YBR090C	>0.9999	YOR387C	<0.0001	YOR258W	>0.9999	YMR070W	>0.9999
YBR069C	8.11	7.95	9.36	8.66	5.74	6.62	7.62	7.4	7.26	8.09	8.32	8.24	5.66	5.6	6.51	6.49													YPL071C	>0.9999	YIL117C	<0.0001	YNL066W	>0.9999	YLR387C	>0.9999
YBR070C	7.36	7.5	7.57	7.55	7.74	7.85	7.95	8.07	7.84	7.57	7.77	7.77	7.4	7.37	8.18	8.04													YFR046C	>0.9999	YBL074C	<0.0001	YFL022C	>0.9999	YHR039C-A	>0.9999
YBR071W	7.89	7.27	7.69	8.16	7.96	8.14	8.18	8.15	7.58	8.18	8.07	7.97	7.38	7.56	8.25	8.42													YBL066C	>0.9999	YLR099W-A	0.5987	YBR188C	>0.9999	YGL085W	>0.9999
YBR072C-A	4.49	2.62	2.36	2.32	3.82	2.82	1.81	1.96	2.31	2.64	1.87	0.95	2.08	2.43	1.86	2.08													YDL109C	>0.9999	YBL041W	>0.9999	YNL104C	>0.9999	YLR292C	>0.9999
YBR072W	8.3	9.22	6.96	7.69	11.07	10.96	8.82	8.91	11.38	9.1	8.34	7.75	10.38	11.19	10.04	9.22													YMR129W	>0.9999	YPR051W	>0.9999	YPR089W	>0.9999	YML038C	>0.9999
YBR073W	7.16	7.3	6.4	6.77	7.17	6.99	6.71	6.54	6.69	7.5	6.82	6.8	7.38	7.3	6.56	6.72													YCR067C	>0.9999	YOL077W-A	>0.9999	YDL084W	>0.9999	YDR395W	>0.9999
YBR074W	8.1	8.09	8.34	8.22	8.22	8.27	8.21	8.27	8.15	8.09	8.04	8.06	8.48	8.18	8.07	8.18													YPL213W	>0.9999	YDL067C	>0.9999	YKL058W	>0.9999	YMR272C	>0.9999
YBR076W	3.32	4.02	3.48	3.57	4.57	3.84	4.53	3.93	3.79	3.62	4.09	4.25	4.35	4.45	4.58	4.38													YER073W	>0.9999	YGL005C	0.1527	YGL008C	>0.9999	YBR115C	0.4195
YBR077C	7.93	8.24	7.93	8.15	7.81	8.28	8.17	8.22	8.17	7.97	8.29	8.24	8	8.03	8.22	8.28													YIL139C	>0.9999	YDR234W	0.2281	YLR310C	>0.9999	YOR222W	>0.9999
YBR078W	12.43	12.32	12.12	12.31	12.32	12.34	12.28	12.32	12.16	12.46	12.23	12.17	12.36	12.44	12.4	12.35													YMR117C	>0.9999	YDR147W	>0.9999	YER091C	>0.9999	YBR162C	>0.9999
YBR079C	10.84	11.01	10.55	10.38	10.46	10.44	10.24	10.14	10.31	10.83	10.02	9.96	10.55	10.52	10.09	10.07													YGR168C	>0.9999	YGL242C	0.1693	YGR201C	>0.9999	YOR113W	>0.9999
YBR080C	8.87	9.34	9.06	9.02	8.9	8.81	9.16	9.14	9.01	8.88	8.88	8.65	9.03	8.92	9.14	9.11													YGR227W	>0.9999	YFL014W	>0.9999	YJR106W	>0.9999	YMR158C-A	>0.9999
YBR081C	8.06	8.07	7.76	7.81	8.05	7.81	7.67	7.7	7.7	8.07	7.53	7.49	8.08	7.94	7.67	7.71													YPL256C	>0.9999	YIL022W	>0.9999	YOL042W	>0.9999	YOR368W	>0.9999
YBR082C	11.51	11.49	10.99	11.15	11.3	11.25	11.08	11.15	11.18	11.55	11.29	11.17	11.26	11.26	11.19	11.18													YML116W	>0.9999	YLL010C	0.9998	YIL014W	>0.9999	YOR030W	>0.9999
YBR083W	6.65	6.87	6.66	6.6	6.87	6.59	6.69	6.57	6.93	6.63	5.92	6.07	6.54	6.47	6.71	6.67													YOR254C	>0.9999	YGL202W	0.1693	YGR218W	>0.9999	YDR275W	>0.9999
YBR084C-A	10.97	10.6	11.18	11.2	10.89	10.98	11.23	11.26	10.93	10.89	11.43	11.43	10.82	10.88	11.16	11.04													YDR172W	>0.9999	YCL044C	>0.9999	YOR089C	>0.9999	YHR205W	>0.9999
YBR084W	9.74	9.34	10.19	9.78	9.61	9.7	9.67	9.72	9.1	9.65	9.6	9.54	9.88	9.73	9.65	9.67													YGR249W	>0.9999	YHR200W	>0.9999	YPL147W	>0.9999	YMR240C	>0.9999
YBR085C-A	8.83	9.61	8.47	9.27	8.68	8.83	8.99	8.89	10.2	8.83	9.44	9.56	8.62	8.99	9.05	9.02													YBL107C	>0.9999	YDL222C	0.0709	YDL001W	>0.9999	YPL179W	>0.9999
YBR085W	5.67	6.23	5.7	4.93	5.74	5.43	5.18	5.36	5.53	6.33	5.56	5.64	6	5.91	5.32	5.45													YBR249C	>0.9999	YCR097W	0.8865	YNR056C	>0.9999	YOR141C	>0.9999
YBR086C	10.1	10.34	10.19	10.24	10.33	10.25	10.23	10.18	10.16	10.22	9.97	9.93	10.35	10.53	10.18	10.17													YHL014C	>0.9999	YLR246W	0.9923	YJL200C	>0.9999	YDR119W	>0.9999
YBR087W	7.43	7.37	8.1	7.88	7.43	7.47	7.89	7.94	7.27	7.43	8.17	8.21	7.3	7.24	7.97	7.99													YGR277C	>0.9999	YJR011C	0.1375	YML101C	>0.9999	YMR277W	>0.9999
YBR088C	10.55	10.37	10.46	10.54	10.81	10.81	10.53	10.42	10.31	10.76	10.61	10.63	10.31	10.59	10.55	10.54													YLR047C	>0.9999	YDL182W	0.5987	YGR162W	0.9048	YNL127W	>0.9999
YBR089C-A	10.17	10.02	9.94	10.12	10.3	10.17	10.07	10.16	10.01	10.14	10.28	10.29	10.29	10.36	10.15	10.14													YDR023W	>0.9999	YEL015W	>0.9999	YJL052W	>0.9999	YDL181W	>0.9999
YBR089C-A	9.88	9.67	9.55	9.72	9.97	9.86	9.77	9.78	9.69	9.91	9.94	9.87	10.17	9.91	9.74	9.66													YOR037W	>0.9999	YOR261C	0.9989	YCR068W	0.1873	YHR084W	>0.9999
YBR090C	2.57	2.39	2.46	1.93	3.02	2.58	2.4	2.67	2.3	2.74	2.13	1.9	2.25	1.14	1.84	2.16													YPR091C	>0.9999	YHR044C	0.0794	YJR147W	>0.9999	YDR486C	>0.9999
YBR091C	6.78	7.47	7.04	7.1	6.94	7.18	7.17	7.05	6.93	7.11	7.5	7.42	6.97	7.14	7.04	7.11													YDR312W	>0.9999	YNL208W	0.9989	YLR346C	>0.9999	YJR111C	0.1992
YBR092C	8.57	8.35	8.6	8.19	7.6	8.03	7.98	7.86	7.35	8.5	7.88	7.99	8.1	7.83	7.63	7.66													YFR009W	>0.9999	YDL040C	>0.9999	YFL017W-A	>0.9999	YAL038W	>0.9999
YBR093C	9.09	7.91	8.58	8.39	7.01	7.81	7.23	8.83	7.49	8.79	8.48	8.47	8.43	7.91	8.5	9.2													YOL002C	>0.9999	YDL246C	>0.9999	YJR137C	>0.9999	YLR285W	>0.9999
YBR094W	8.29	8.11	8.44	8.38	7.98	8.39	8.2	8.2	8.88	7.86	8.14	8.14	7.73	7.79	8.23	8.18													YEL073C	>0.9999	YNR050C	>0.9999	YGR202C	>0.9999	YNR060W	>0.9999
YBR095C	7.55	7.28	7.42	7.32	7.5	7.32	7.26	7.16	7.44	7.48	7.56	7.55	7.53	7.59	7.2	7.18													YPL005W	0.9782	YDR305C	0.9676	YDR206W	>0.9999	YHR174W	>0.9999
YBR096W	8.94	9.23	9.3	9.4	9.42	9.48	9.69	9.6	9.66	9.12	9.64	9.62	9.37	9.44	9.62	9.64													YLR044C	>0.9999	YNL287W	0.9994	YKL204W	>0.9999	YPL130W	>0.9999
YBR097W	7.62	8.08	7.63	7.67	7.77	7.68	7.82	7.81	7.81	7.77	7.71	7.62	8.29	7.98	7.85	7.83													YGL189C	>0.9999	YER052C	0.9885	YJL019W	>0.9999	YKR009C	>0.9999
YBR098W	6.09	5.63	5.86	6.1	6.22	5.82	6.06	6.18	5.59	5.84	5.82	5.74	6.12	6.06	5.99	6.15													YDR256C	>0.9999	YLL053C	0.2509	YIR022W	>0.9999	YOR293C-A	>0.9999
YBR101C	9.44	9.66	9.25	9.29	8.93	9.11	9.04	8.91	9.4	9.26	9.57	9.7	8.91	9.01	9	9.12													YCR053W	>0.9999	YOR098C	0.1236	YPL190C	0.9408	YFR032C-A	>0.9999
YBR102C	7.52	7.8	7.38	7.35	7.28	7.3	7.14	7.11	7.2	7.57	7.25	7.25	7.68	7.49	7.12	7.19													YLR417W	>0.9999	YDR320C-A	0.9764	YCR075W-A	>0.9999	YLR083C	>0.9999
YBR103W	7.55	7.82	7.49	7.52	7.45	7.3	7.61	7.56	7.46	7.6	7.65	7.75	7.55	7.52	7.61	7.71													YNR007C	>0.9999	YNL251C	0.995	YKL205W	>0.9999	YKR098C	>0.9999
YBR104W	8.55	8.53	8.76	8.42	7.73	8	8.27	7.9	8.58	8.58	8.55	8.6	8.22	7.73	7.79	7.77													YLL066W-B	>0.9999	YGR126W	>0.9999	YDR062W	>0.9999	YBR217W	>0.9999
YBR105C	7.68	8.33	9.11	8.4	8.65	8.54	8.73	8.69	9.77	7.94	8.06	8.15	8.58	8.59	8.55	8.58													YER069W	>0.9999	YPL169C	0.6354	YHR024C	>0.9999	YDR372C	>0.9999
YBR106W	11.43	11.55	11.31	11.35	11.26	11.42	11.2	11.31	11.46	11.34	11.49	11.47	11.27	11.21	11.31	11.33													YDR322C-A	>0.9999	YMR048W	0.9269	YLR187W	>0.9999	YDR031W	>0.9999
YBR107C	5.59	6.01	6.05	5.98	6.17	5.96	6.06	6.11	5.48	5.87	6.21	6.34	6.22	6.33	6.28	6.18													YBL054W	>0.9999	YBR166C	>0.9999	YNL044W	>0.9999	YHR207C	>0.9999
YBR108W	5.94	5.84	5.64	5.89	6.46	6.11	5.99	5.88	6.25	5.67	5.42	5.37	5.59	5.68	6.01	5.78													YMR165C	>0.9999	YOR168W	>0.9999	YOR316C-A	0.2994	YER089C	>0.9999
YBR109C	10.61	10.63	10.53	10.58	10.66	10.75	10.71	10.68	10.89	10.68	10.69	10.67	10.47	10.5	10.71	10.68													YPL271W	>0.9999	YDR315C	0.4554	YFR003C	>0.9999	YNR052C	>0.9999
YBR110W	8.07	8.21	7.99	8.1	7.92	7.99	7.93	8.04	8.32	7.92	8.07	8.19	8.05	8.03	8.04	8.05													YHL006C	>0.9999	YHL031C	>0.9999	YJR058C	>0.9999	YHR073W	>0.9999
YBR111C	9.86	10.14	9.54	9.92	10.23	10.35	10.08	10.08	10.58	10.04	10.23	10.16	10.23	10.34	10.1	10.03													YER142C	>0.9999	YBR233W-A	0.3585	YGR054W	>0.9999	YKR083C	>0.9999
YBR111W-A	7.12	6.85	7.11	7.22	6.98	7.15	7.43	7.43	7.13	7.06	7.58	6.99	7.41	7.21	7.21	7.1													YOR083W	>0.9999	YMR065W	>0.9999	YDR169C-A	>0.9999	YDR403W	>0.9999
YBR112C	8.76	8.86	8.91	8.64	8.98	8.59	8.73	8.66	8.23	8.99	8.76	8.69	9.04	9.19	8.66	8.79													YLR342W	>0.9999	YNL265C	>0.9999	YHR143W	>0.9999	YKL211C	0.3813
YBR114W	6.96	7.16	7.42	6.78	6.71	6.42	6.74	6.77	7.39	6.99	6.75	6.82	6.76	6.76	6.62	6.71													YFL059W	>0.9999	YCR084C	0.1236	YER125W	>0.9999	YMR145C	>0.9999
YBR115C	9.97	10.34	10.57	10.4	10.26	10.09	10.48	10.15	9.77	10.03	9.64	9.66	10.43	10.4	9.91	9.69													YDL085C-A	>0.9999	YLR154W-F	0.8354	YER090W	>0.9999	YER186C	>0.9999
YBR117C	3.53	4.16	4.19	3.8	3.81	3.22	3.89	4.07	3.77	3.32	3.73	4.1	3.42	3.67	4	3.83													YLR053C	>0.9999	YLR351C	>0.9999	YLR262C-A	>0.9999	YDL223C	>0.9999
YBR118W	13.29	13.26	13.33	13.31	13.31	13.31	13.29	13.29	13.37	13.28	13.23	13.27	13.24	13.19	13.27	13.24													YKL149C	>0.9999	YDR125C	>0.9999	YIR034C	>0.9999	YJL139C	>0.9999
YBR119W	7.33	7.35	7.49	7.44	7.6	7.48	7.7	7.6	7.64	7.37	7.55	7.54	7.47	7.59	7.61	7.68													YBL081W	>0.9999	YLR429W	>0.9999	YGL206C	>0.9999	YLR389C	>0.9999
YBR120C	7.05	7.35	7.17	7.41	7.45	7.45	7.38	7.36	7.08	7.34	7.71	7.7	6.99	7.53	7.44	7.58													YIL090W	>0.9999	YKL061W	0.9885	YEL032W	>0.9999	YGR087C	>0.9999
YBR121C	11.55	11.55	11.41	11.31	11.27	11.23	11.14	11.21	11.17	11.7	11.27	11.25	11.47	11.44	11.18	11.2													YDR189W	>0.9999	YPL202C	>0.9999	YGR240C	>0.9999	YOR122C	>0.9999
YBR122C	8.72	9.38	8.57	8.73	9.16	9.28	8.78	8.63	9.2	8.92	8.86	8.96	9.16	9.25	8.78	8.72													YGR257C	>0.9999	YLR355C	0.943	YPL133C	>0.9999	YER087W	>0.9999
YBR123C	7.84	7.9	7.71	7.81	7.75	7.65	7.69	7.78	7.67	7.8	7.85	7.87	7.97	7.85	7.69	7.65													YOR383C	>0.9999	YLR081W	0.0562	YHR032W	>0.9999	YMR115W	>0.9999
YBR125C	7.57	7.9	7.52	7.58	7.19	7.23	7.44	7.43	7.46	7.57	7.84	7.86	7.34	7.48	7.46	7.4													YKR074W	>0.9999	YDR422C	>0.9999	YER030W	>0.9999	YKL168C	>0.9999
YBR126C	10.03	10.74	9.66	10.31	10.84	10.47	10.49	10.41	10.5	9.95	9.99	9.86	10.13	10.69	10.43	10.38													YOR022C	>0.9999	YLL057C	>0.9999	YPL034W	>0.9999	YGL030W	>0.9999
YBR127C	11.8	12.12	11.58	11.74	11.9	11.84	11.69	11.87	11.76	11.83	11.74	11.55	11.98	12.02	11.9	11.83													YOL036W	>0.9999	YOR014W	>0.9999	YHR108W	>0.9999	YHR114W	>0.9999
YBR128C	4.7	4.85	4.37	4.76	5.16	4.79	5.26	5.33	5.2	4.36	4.83	4.86	4.89	5.15	5.29	5.49													YIL143C	>0.9999	YPL134C	0.6717	YLR387C	>0.9999	YDR373W	>0.9999
YBR129C	6.35	6.53	6.51	6.8	6.2	6.46	6.79	6.85	6.42	6.45	7.35	7.39	6.71	6.83	6.78	6.8													YDR323C	>0.9999	YCR095C	>0.9999	YHR039C-A	>0.9999	YOL005C	>0.9999
YBR130C	8.47	7.87	8.46	8.51	8.07	8.18	8.39	8.61	8.01	8.16	8.23	8.19	8.05	7.82	8.55	8.53													YKL011C	>0.9999	YNL217W	0.9969	YGL085W	>0.9999	YGR153W	0.9185
YBR131W	7.64	7.85	7.45	7.41	7.49	7.52	7.23	7.13	7.71	7.52	7.47	7.6	7.64	7.62	7.09	7.18													YOR394C-A	>0.9999	YPR129W	0.1527	YLR292C	>0.9999	YNL330C	>0.9999
YBR132C	7.8	7.96	7.21	8	8.7	8.76	8.5	8.44	8.52	7.51	7.18	6.8	7.87	7.95	8.52	8.43													YPL120W	>0.9999	YKR068C	>0.9999	YML038C	>0.9999	YLR091W	>0.9999
YBR133C	7.52	7.85	7.74	7.67	7.85	7.33	7.72	7.81	7.4	7.75	7.54	7.56	8	7.92	7.87	7.87													YNR044W	>0.9999	YER040W	0.5258	YDR395W	>0.9999	YPL254W	>0.9999
YBR135W	8.84	8.73	8.6	8.61	8.69	8.7	8.59	8.51	8.92	8.89	8.43	8.43	8.37	8.37	8.63	8.47													YPL243W	>0.9999	YGL066W	0.1109	YBR115C	>0.9999	YOL108C	>0.9999
YBR136W	7.02	7.17	6.99	6.88	7.23	6.75	6.91	6.74	7.17	7.01	6.54	6.45	7.19	7.07	6.74	6.81													YLR253W	>0.9999	YJR045C	>0.9999	YOR222W	>0.9999	YBL023C	>0.9999
YBR137W	8.13	8.51	8.19	8.52	8.39	8.64	8.47	8.42	8.76	8.08	8.74	8.61	8.14	8.25	8.38	8.4													YLR303W	>0.9999	YML011C	>0.9999	YBR162C	>0.9999	YPR043W	>0.9999
YBR138C	5.95	6.5	5.52	6.3	6.18	6.14	6.45	6.16	5.61	6.17	6.75	6.72	6.66	6.88	6.41	6.42													YOR179C	>0.9999	YDR037W	0.6354	YOR113W	>0.9999	YGR063C	>0.9999
YBR139W	9.19	9.53	9.48	9.87	10.17	9.8	10.13	10.22	9.98	9.35	9.87	9.68	10.32	10.49	10.32	10.24													YOR361C	0.4354	YPR046W	>0.9999	YMR158C-A	0.2737	YMR309C	>0.9999
YBR140C	9.95	10.52	9.52	9.42	10.09	9.75	9.58	9.45	9.94	10.19	9.16	9.05	10.38	10.03	9.47	9.52													YBR031W	>0.9999	YMR314W	0.9081	YOR368W	>0.9999	YOR336W	>0.9999
YBR141C	6.94	6.89	7.21	6.43	5.52	6.21	5.83	6	6.19	6.88	6.57	6.7	6.04	5.65	5.72	5.78													YDL133W	>0.9999	YBR268W	0.9998	YOR030W	>0.9999	YNL149C	>0.9999
YBR142W	10.14	10	9.82	9.33	9.13	9.3	8.6	8.63	9.27	10.19	9.37	9.34	9.75	9.46	8.43	8.36													YPR008W	>0.9999	YER070W	0.8623	YDR275W	0.9662	YKL156W	>0.9999
YBR143C	10.69	10.84	10.65	10.79	10.72	10.76	10.7	10.62	10.62	10.85	10.86	10.91	10.81	11.03	10.59	10.4													YGL091C	>0.9999	YCL030C	0.1236	YHR205W	0.9547	YER157W	>0.9999
YBR145W	9.35	9.06	9.86	9.93	9.35	9.78	10.2	10.02	9.66	8.66	9.09	9.14	8.68	9.06	10	10.09													YOR011W-A	>0.9999	YER008C	>0.9999	YMR240C	>0.9999	YJR143C	>0.9999
YBR146W	8.4	8.56	8.66	8.77	8.49	8.71	8.74	8.76	8.44	8.4	9.01	8.9	8.47	8.48	8.73	8.64													YLR093C	>0.9999	YDR079C-A	0.1375	YPL179W	>0.9999	YOR260W	>0.9999
YBR147W	7.48	7.89	7.7	8.47	8.84	8.74	9.49	8.57	9.07	7.26	7.16	7.42	8.41	8.79	8.57	8.1													YGL240W	>0.9999	YNL220W	>0.9999	YOR141C	>0.9999	YGR212W	>0.9999
YBR148W	5.09	5.39	4.91	5.21	6.12	5.33	5.34	5.09	5.85	5.68	4.83	5.06	5.41	5.43	5.19	5.1													YOR382W	>0.9999	YGR041W	0.3585	YDR119W	>0.9999	YDL106C	>0.9999
YBR149W	9.63	9.88	9.55	9.91	10.01	10.08	10.13	10.09	10.26	9.7	10.04	9.87	9.49	9.77	10.16	10.12													YML079W	>0.9999	YCR076C	>0.9999	YMR277W	>0.9999	YGL189C	>0.9999
YBR150C	7.14	7.27	6.85	7.35	7.57	6.89	7.32	7.35	7.44	7.44	7.13	7.1	7.9	7.76	7.35	7.45													YLR170C	>0.9999	YOR258W	>0.9999	YNL127W	>0.9999	YOL130W	>0.9999
YBR151W	8.89	9.2	8.74	8.96	9.17	9.17	9.1	9.14	9.01	8.88	9.19	9.18	9.15	9.15	9.1	9.11													YER048W-A	>0.9999	YNL066W	0.1873	YDL181W	>0.9999	YOR342C	>0.9999
YBR152W	4.81	4.54	4.42	4.48	4.72	4.22	4.29	4.27	3.85	4.7	4.56	4.68	5.1	5.25	3.92	4													YDR541C	>0.9999	YLR026C	0.5258	YHR084W	>0.9999	YDR522C	>0.9999
YBR153W	7.51	7.51	6.94	7.19	7.56	7.26	7.4	7.16	7.68	7.51	7.42	7.47	7.3	7.64	7.3	7.4													YPR045C	>0.9999	YFL022C	>0.9999	YDR486C	>0.9999	YGR183C	>0.9999
YBR154C	10.51	10.06	10.17	10.04	10.18	10.3	9.78	9.66	10.12	10.5	9.95	10.04	10.11	10.14	9.56	9.58													YLR097C	>0.9999	YBR188C	>0.9999	YJR111C	>0.9999	YJL078C	>0.9999
YBR155W	9.28	8.88	9.12	8.59	8.47	8.75	7.96	8.01	8.98	9.21	8.5	8.64	8.69	8.42	7.8	7.8													YJL214W	>0.9999	YPR089W	0.1527	YAL038W	>0.9999	YGR266W	>0.9999
YBR156C	6.63	6.13	6.6	6.56	6.43	6.2	6.49	6.61	6.1	6.68	6.1	6.23	6.68	6.4	6.46	6.59													YBR196C	>0.9999	YDL084W	>0.9999	YLR285W	>0.9999	YHR067W	>0.9999
YBR157C	7.02	7.16	4.67	5.35	7.49	7.93	5.7	5.73	8.81	7.45	5.49	5.27	7.2	7.5	5.93	5.47													YPL252C	>0.9999	YKL058W	0.9994	YNR060W	>0.9999	YCR071C	>0.9999
YBR158W	9.28	9.59	9.39	8.86	9.59	9.1	8.87	8.9	8.69	9.54	8.96	8.88	9.98	9.64	8.74	8.7													YOL159C-A	>0.9999	YGL008C	0.7749	YMR096W	0.1119	YDR226W	>0.9999
YBR159W	9.71	9.84	9.97	10	10.07	10.14	10.19	10.27	10	9.68	10.15	10.2	9.85	9.76	10.25	10.26													YCR008W	>0.9999	YLR310C	0.6354	YHR174W	>0.9999	YLL018C	>0.9999
YBR160W	7.97	8.21	7.89	8.18	7.93	8.09	8.22	8.22	7.46	8.05	8.34	8.29	7.52	7.86	8.3	8.31													YHL002W	>0.9999	YDL245C	>0.9999	YKR009C	>0.9999	YMR315W-A	>0.9999
YBR161W	6.66	6.71	7.06	7.23	7.08	7.06	7.67	7.58	6.76	6.61	7.45	7.47	7.06	7.2	7.59	7.74													YNL262W	>0.9999	YER091C	>0.9999	YOR293C-A	>0.9999	YLR213C	0.956
YBR162C	11.61	11.33	11.47	11.52	11.54	11.6	11.45	11.38	11.33	11.39	11.2	11.15	11.46	11.38	11.44	11.45													YPL216W	>0.9999	YGR201C	>0.9999	YFR032C-A	>0.9999	YAL048C	>0.9999
YBR162W-A	9.92	9.61	9.46	9.6	10.1	10.12	9.73	9.58	10.34	10.16	9.69	9.69	10.36	10.08	9.71	9.66													YLR326W	>0.9999	YJR106W	0.6354	YLR083C	>0.9999	YOL027C	>0.9999
YBR163W	7.32	7.05	7.5	7.45	7.37	7.17	7.51	7.55	7.37	7.23	7.33	7.33	7.47	7.34	7.58	7.5													YCL034W	>0.9999	YOL042W	0.7418	YJR109C	>0.9999	YAL016W	>0.9999
YBR164C	9.53	9.5	9.01	9.2	9.3	9.54	9.16	9.02	9.31	9.61	9.53	9.59	9.31	9.5	9.09	9.09													YNL037C	0.9998	YIL014W	0.9989	YKR098C	>0.9999	YOL026C	>0.9999
YBR165W	6.81	7.01	7.15	7.19	7	6.88	7.22	7.3	6.82	6.89	7.48	7.49	7.47	7.38	7.11	7.18													YNL124W	>0.9999	YGR218W	0.9885	YBR217W	>0.9999	YOR246C	>0.9999
YBR166C	8.38	8.68	8.69	8.55	8.38	8.56	8.6	8.44	8.58	8.28	8.36	8.38	8.19	8.29	8.35	8.33													YFR032C	>0.9999	YOR089C	0.8865	YDR372C	>0.9999	YLR082C	>0.9999
YBR167C	7.24	7.43	7.09	7.31	7.12	7.33	7.22	7.08	7.38	7.46	7.48	7.44	7.31	7.53	6.99	7.1													YNL245C	>0.9999	YPL147W	>0.9999	YDR031W	>0.9999	YLR010C	>0.9999
YBR168W	7.47	6.86	7.19	7.16	7.67	7.58	7.39	7.31	7.47	6.83	6.99	7.1	6.88	7	7.27	7.4													YGR094W	>0.9999	YDL001W	>0.9999	YHR207C	>0.9999	YPL115C	>0.9999
YBR169C	8.43	9.03	7.66	8.29	8.99	8.93	8.36	8.41	9.48	8.5	8.21	8.01	8.22	8.82	8.59	8.41													YEL044W	>0.9999	YNR056C	0.6354	YER089C	>0.9999	YPR042C	>0.9999
YBR170C	7.38	7.46	7.23	7.4	7.3	7.51	7.43	7.3	8.14	7.37	7.37	7.38	7.18	7.25	7.41	7.39													YKR020W	>0.9999	YJL200C	>0.9999	YNR052C	>0.9999	YCL032W	>0.9999
YBR171W	9	9.23	8.96	8.99	9.1	9.23	8.95	8.81	8.94	8.92	9.13	9.24	8.52	8.72	8.77	8.85													YGL245W	>0.9999	YML101C	0.3894	YHR073W	>0.9999	YGL136C	>0.9999
YBR172C	8.51	8.17	8.65	8.22	8.25	8	8.1	8.09	7.74	8.28	7.96	8.09	8.38	8.15	7.95	7.91													YLR373C	>0.9999	YJL052W	>0.9999	YKR083C	>0.9999	YKR103W	>0.9999
YBR173C	8.91	8.36	8.45	8.56	8.69	8.8	8.52	8.64	8.89	8.85	8.83	8.63	8.64	8.69	8.58	8.52													YDL165W	>0.9999	YCR068W	0.4218	YDR403W	>0.9999	YKL154W	>0.9999
YBR175W	6.92	7.13	7.17	7.17	6.93	7.04	7.25	7.29	7.32	6.92	7.24	7.39	6.99	7.08	7.34	7.25													YDR201W	0.9993	YLR346C	>0.9999	YKL211C	>0.9999	YLR288C	>0.9999
YBR176W	7.07	7.1	7.15	7.14	6.98	6.9	7.09	7.08	7.03	7.15	7.44	7.46	6.99	7.26	7.07	7.02													YOR064C	>0.9999	YFL017W-A	>0.9999	YMR145C	0.0645	YDL037C	>0.9999
YBR177C	9.79	9.76	9.86	10.06	9.95	9.94	10.07	10.1	9.93	9.47	9.91	9.81	9.68	9.72	10.19	10.07													YOR109W	>0.9999	YJR137C	>0.9999	YER186C	>0.9999	YBR090C	0.2797
YBR179C	7.34	7.49	7.46	7.47	7.23	7.06	7.26	7.42	7.07	7.53	7.49	7.45	7.66	7.5	7.26	7.35													YDR111C	>0.9999	YGR202C	>0.9999	YJL139C	>0.9999	YPL071C	>0.9999
YBR180W	4.4	4.03	5.04	4.58	4.65	4.71	4.73	4.98	4.47	4.43	4.11	4.71	4.51	4.69	4.83	4.72													YNL218W	>0.9999	YDR206W	0.2509	YLR389C	>0.9999	YFR046C	>0.9999
YBR181C	12.61	12.52	12.65	12.64	12.54	12.59	12.59	12.61	12.46	12.61	12.7	12.74	12.54	12.58	12.58	12.59													YLR260W	>0.9999	YKL204W	0.7073	YOR122C	>0.9999	YBL066C	>0.9999
YBR182C	4.55	4.51	5.57	5.48	4.41	4.31	5.5	5.42	4.2	4.55	5.5	5.54	4.12	4.26	5.84	5.96													YLR027C	>0.9999	YJL019W	0.8865	YER087W	>0.9999	YDL109C	>0.9999
YBR182C-A	1.63	1.97	2.08	1.22	2.64	1.48	1.88	2.17	1.17	2.61	2.18	2.65	2.23	2.31	2.08	2.34													YPR182W	>0.9999	YIR022W	>0.9999	YMR115W	>0.9999	YMR129W	>0.9999
YBR183W	5.5	6.28	6.3	6.97	6.81	6.59	7.61	7.67	5.86	5.56	7.32	7.28	6.16	6.74	7.7	7.71													YLR286C	>0.9999	YCR075W-A	0.9998	YKL168C	>0.9999	YCR067C	>0.9999
YBR184W	4.49	4.24	4.31	4.64	4.36	3.75	4.39	4.5	3.38	4.3	4.68	4.85	4.56	4.42	4.45	4.4													YHR188C	>0.9999	YKL205W	0.0794	YGL030W	>0.9999	YPL213W	>0.9999
YBR185C	6.88	7.24	7.44	7.49	7.04	7.18	7.49	7.49	6.52	7.25	7.69	7.72	7.21	7.38	7.43	7.56													YMR213W	>0.9999	YDR062W	>0.9999	YHR114W	>0.9999	YIL139C	>0.9999
YBR186W	2.73	2.63	2.2	2.38	2.93	1.76	1.81	2.63	1.91	2.52	2.54	2.56	2.92	2.44	2.29	1.6													YKL051W	>0.9999	YHR024C	>0.9999	YDR373W	>0.9999	YMR117C	>0.9999
YBR187W	9.45	9.78	9.74	9.58	9.46	9.71	9.68	9.65	9.6	9.56	9.8	9.81	9.69	9.65	9.67	9.67													YLR291C	>0.9999	YNL044W	>0.9999	YOL005C	>0.9999	YGR168C	>0.9999
YBR188C	7.04	6.94	7.01	7.12	7.05	7.03	7.15	7.02	7.19	7.18	7.38	7.49	7.34	7.34	6.98	7.01													YER130C	>0.9999	YOR316C-A	>0.9999	YGR153W	>0.9999	YGR227W	>0.9999
YBR189W	11.94	12.09	12.29	12.23	11.87	11.94	12.2	12.25	11.8	12.01	12.35	12.29	12.02	12.09	12.18	12.17													YGR234W	>0.9999	YFR003C	0.0889	YNL330C	>0.9999	YPL256C	>0.9999
YBR191W	12.28	12.39	12.39	12.43	12.29	12.34	12.45	12.44	12.29	12.36	12.56	12.54	12.3	12.32	12.45	12.45													YIL065C	>0.9999	YJR058C	0.943	YLR091W	>0.9999	YML116W	0.9999
YBR191W	11.95	12.15	12.05	12.17	12.03	12.05	12.24	12.19	11.96	12.06	12.26	12.28	11.83	12.06	12.28	12.32													YLR185W	>0.9999	YGR054W	0.8865	YPL254W	>0.9999	YOR254C	>0.9999
YBR192W	6.73	6.85	7.05	7.02	6.77	6.88	6.94	7.08	6.78	6.89	7.24	7.23	6.75	6.86	6.93	6.88													YAL033W	>0.9999	YDR169C-A	>0.9999	YOL108C	>0.9999	YDR172W	>0.9999
YBR193C	6.34	6.59	6.42	6.63	6.28	6.43	6.55	6.46	6.42	6.35	6.64	6.7	6.13	6.22	6.55	6.54													YNL194C	>0.9999	YHR143W	0.6354	YBL023C	>0.9999	YGR249W	>0.9999
YBR194W	6.08	6.43	6.03	6.44	6.15	6.23	6.35	6.25	6.52	6.17	6.54	6.53	6.2	6.32	6.33	6.32													YOR271C	>0.9999	YER125W	>0.9999	YPR043W	>0.9999	YBL107C	>0.9999
YBR195C	7.95	8.19	7.88	7.91	8.47	8.38	8.24	8.17	8.2	8.2	7.95	7.83	8.54	8.52	8.27	7.99													YOR356W	>0.9999	YER090W	0.9565	YGR063C	>0.9999	YBR249C	0.9866
YBR196C	12.44	12.43	12.37	12.33	12.43	12.34	12.39	12.44	12.41	12.32	12.23	12.14	12.24	12.32	12.42	12.42													YOL058W	>0.9999	YLR262C-A	0.9994	YMR309C	>0.9999	YHL014C	>0.9999
YBR196C-A	4.14	4.65	4.8	4.07	4.29	4.2	4.44	4.55	3.5	4.33	4.5	4.44	4.55	4.65	4.28	4.48													YLR190W	>0.9999	YGR273C	0.1527	YOR336W	>0.9999	YGR277C	>0.9999
YBR196C-B	3.42	3.56	3.7	3.51	3.36	3.34	3.41	3.39	2.8	3.55	3.58	3.47	3.82	3.72	3.53	3.22													YER046W	>0.9999	YEL032W	0.9565	YNL149C	>0.9999	YLR047C	>0.9999
YBR197C	6.51	6.59	6.27	6.35	6.23	6.53	6.19	6.2	6.2	6.51	6.52	6.59	6.33	6.38	6.28	6.16													YPL250C	>0.9999	YGR240C	0.7749	YKL156W	>0.9999	YNL160W	0.9993
YBR198C	9.15	9.48	8.86	8.7	8.97	8.77	8.51	8.66	8.53	9.35	8.69	8.62	9.27	9.03	8.49	8.52													YDR279W	>0.9999	YPL133C	>0.9999	YJR143C	>0.9999	YDR023W	>0.9999
YBR199W	9.03	9.15	8.87	9.14	9.48	9.38	9.25	9.24	9.78	9.06	9.15	8.92	9.46	9.49	9.23	9.24													YEL019C	>0.9999	YHR032W	0.2069	YOR260W	>0.9999	YOR037W	>0.9999
YBR200W	6.74	6.62	6.72	6.64	6.56	6.63	6.86	6.8	6.58	6.68	6.85	6.86	6.71	6.65	6.83	6.73													YER146W	>0.9999	YER030W	>0.9999	YGR212W	>0.9999	YPR091C	>0.9999
YBR200W-A	2.11	1.96	1.63	1.18	3.73	1.79	1.85	2.14	1.66	2.54	1.93	1.71	2.55	2.61	2.41	2.72													YNL144C	>0.9999	YPL034W	>0.9999	YGL189C	>0.9999	YDR312W	>0.9999
YBR201W	6.8	7.01	7.19	7.18	7.42	7.05	7.47	7.47	7.32	6.94	7.48	7.56	7.28	7.43	7.53	7.57													YMR292W	>0.9999	YHR108W	>0.9999	YOL130W	>0.9999	YFR009W	>0.9999
YBR202W	8.72	8.35	8.75	8.66	9.05	8.73	8.72	8.6	8.86	8.83	8.41	8.27	8.72	8.93	8.65	8.56													YKL183W	>0.9999	YLR387C	>0.9999	YOR342C	>0.9999	YOL002C	>0.9999
YBR203W	5.5	6.17	5.24	5.67	5.68	5.4	5.73	5.38	6.19	5.55	5.74	5.67	5.5	6.11	5.8	6.14													YOR384W	0.8209	YHR039C-A	>0.9999	YDR522C	0.9994	YEL073C	0.9993
YBR204C	6.58	6.65	6.82	6.95	7.09	7.18	7.32	7.42	7.02	6.3	7.4	7.28	6.62	6.77	7.37	7.35													YGL071W	>0.9999	YGL085W	>0.9999	YGR183C	>0.9999	YPL005W	>0.9999
YBR205W	8.68	8.59	8.7	8.71	8.82	9.02	8.79	8.8	8.89	8.72	8.77	8.76	8.82	8.8	8.83	8.85													YBL095W	>0.9999	YLR292C	0.2509	YJL078C	>0.9999	YLR044C	>0.9999
YBR207W	8.69	9.04	8.6	8.64	8.83	8.76	8.71	8.7	8.75	8.7	8.76	8.56	9.02	8.85	8.77	8.62													YKL133C	>0.9999	YML038C	>0.9999	YGR266W	>0.9999	YGL189C	>0.9999
YBR208C	6.6	6.83	8.27	8.16	7.95	7.52	8.81	8.92	9.3	6.9	8.14	7.99	8.18	8.28	9.27	9.26													YDL183C	>0.9999	YDR395W	>0.9999	YHR067W	>0.9999	YDR256C	>0.9999
YBR210W	7.66	7.76	7.82	8.03	7.79	7.99	8.24	8.16	8.14	7.78	8.2	8.24	7.69	7.91	8.09	8.11													YJL031C	>0.9999	YOR222W	0.9981	YCR071C	>0.9999	YCR053W	>0.9999
YBR211C	6.44	6.2	6.52	6.63	6.4	6.41	6.62	6.63	6.02	6.41	6.93	6.96	6.72	6.78	6.71	6.74													YKR008W	>0.9999	YBR162C	>0.9999	YDR226W	>0.9999	YLR417W	>0.9999
YBR212W	8.01	7.93	7.69	7.72	9.18	8.29	7.77	7.7	8.47	7.88	7.01	7.07	7.48	7.53	7.8	7.63													YPL152W-A	>0.9999	YOR113W	0.6354	YLL018C	>0.9999	YNR007C	>0.9999
YBR213W	8.47	8.5	7.47	8.28	7.88	8.29	8.08	8.22	8	8.41	7.98	8.28	8.39	8.09	8.07	7.8													YMR237W	>0.9999	YOR368W	>0.9999	YAL048C	>0.9999	YLL066W-B	>0.9999
YBR214W	7.5	8.57	7.22	7.93	9.16	8.74	8.65	8.45	9.1	7.79	7.65	7.58	8.43	9.31	8.74	8.75													YIL071C	>0.9999	YOR030W	0.0993	YOL027C	>0.9999	YDR322C-A	>0.9999
YBR215W	7.95	7.92	7.46	7.48	7.99	7.76	7.35	7.39	7.72	8.14	7.55	7.35	8.04	8.05	7.39	7.42													YDR011W	>0.9999	YDR275W	>0.9999	YAL016W	>0.9999	YBL054W	>0.9999
YBR216C	6.39	6.62	6.72	6.71	6.19	6.1	6.76	6.85	5.76	6.43	6.87	6.86	6.33	6.34	6.79	6.94													YDR313C	>0.9999	YHR205W	0.2509	YHR071W	>0.9999	YMR165C	>0.9999
YBR217W	6.33	6.3	6.34	6.47	6.14	6.3	6.4	6.35	6.46	6.29	6.64	6.67	6.59	6.48	6.38	6.32													YJL047C	>0.9999	YMR240C	>0.9999	YOL026C	>0.9999	YPL271W	>0.9999
YBR218C	10.82	10.98	11.15	11.02	11.21	11.04	11.28	11.07	11	10.95	10.61	10.59	11.38	11.4	10.96	10.89													YHR105W	>0.9999	YPL179W	0.8623	YOR246C	>0.9999	YHL006C	>0.9999
YBR219C	8.24	8.55	8.4	8.39	8.01	8.08	8.31	8.33	8.19	8.21	8.39	8.15	8.27	8.12	8.26	8.28													YEL059C-A	>0.9999	YOR141C	0.9676	YLR082C	>0.9999	YER142C	>0.9999
YBR219C	3.14	3.38	3.32	2.85	4.43	3	3.12	2.56	3.28	3.67	2.8	2.57	3.9	3.84	2.82	2.93													YIL137C	>0.9999	YDR119W	0.7073	YLR010C	>0.9999	YOR083W	>0.9999
YBR220C	7.26	6.93	7.96	7.3	7.77	8.14	8.03	9.07	6.61	6.66	6.95	6.89	6.52	6.39	7.67	7.97													YNL090W	>0.9999	YMR277W	0.5987	YPL115C	>0.9999	YLR342W	>0.9999
YBR221C	11.16	11.35	11.28	11.32	11.03	10.93	11.24	11.45	11.4	11.12	11.35	11.27	11.17	11.21	11.44	11.43													YJR057W	>0.9999	YNL127W	>0.9999	YPR042C	>0.9999	YFL059W	>0.9999
YBR221W-A	3.67	1.52	3.71	3.43	4.06	4.62	3.54	3.31	3.6	2.58	2.3	3.67	2.18	2.59	3.44	4.33													YML029W	>0.9999	YDL181W	0.1109	YCL032W	>0.9999	YDL085C-A	>0.9999
YBR222C	6.99	7.49	7.32	7.65	7.74	7.82	7.98	7.84	8.15	7.09	7.52	7.46	7.33	7.79	8.34	8													YGL125W	>0.9999	YHR084W	>0.9999	YGL136C	0.9754	YKL149C	>0.9999
YBR223C	5.36	6.07	4.91	5.4	5.66	5.62	5.35	5.32	4.94	5.66	5.29	5.2	5.55	5.61	5.42	5.48													YGL047W	>0.9999	YDR486C	>0.9999	YKR103W	0.4853	YBL081W	>0.9999
YBR225W	6.28	6.67	6.38	6.57	6.66	6.51	6.63	6.63	6.84	6.45	6.33	6.22	6.84	6.78	6.64	6.56													YOR111W	>0.9999	YAL038W	>0.9999	YKL154W	>0.9999	YIL090W	>0.9999
YBR227C	8.72	8.76	8.5	8.18	8.69	8.57	8.06	8.04	8.86	9.02	8.24	8.23	8.99	8.96	8.03	8.05													YBR072C-A	>0.9999	YLR285W	>0.9999	YLR288C	>0.9999	YDR189W	>0.9999
YBR228W	6.84	7.04	6.45	6.53	6.97	6.69	6.54	6.53	6.94	6.99	6.58	6.77	7.05	6.97	6.47	6.55													YGL131C	>0.9999	YNR060W	>0.9999	YDL037C	>0.9999	YGR257C	>0.9999
YBR229C	8.97	9.22	8.6	8.92	9.03	8.94	8.72	8.82	8.92	9.11	8.99	8.88	9.35	9.24	8.76	8.79													YLR437C	>0.9999	YHR174W	>0.9999	YPL071C	>0.9999	YOR383C	>0.9999
YBR230C	8.98	9.17	9.01	9.4	9.59	9.47	9.51	9.37	9.74	9.02	9.38	9.3	8.79	9.21	9.31	9.31													YDR251W	>0.9999	YPL130W	>0.9999	YFR046C	>0.9999	YKR074W	>0.9999
YBR230W-A	8.09	8.61	7.78	8.07	9.06	9.09	8.54	8.37	8.84	8.42	8.54	8.51	9.05	9.18	8.57	8.6													YPL016W	>0.9999	YKR009C	>0.9999	YBL066C	0.0722	YOR022C	>0.9999
YBR231C	6.38	7.2	6.03	6.23	6.36	6.37	6.18	6.14	7.1	6.83	6.47	6.61	6.52	6.59	6.28	6.09													YGR189C	>0.9999	YOR293C-A	>0.9999	YDL109C	>0.9999	YOL036W	>0.9999
YBR233W	7.8	7.59	7.67	7.69	8.32	8.01	7.62	7.58	8.06	7.62	7.37	7.31	7.47	7.63	7.74	7.73													YDR012W	>0.9999	YEL025C	0.9081	YMR129W	>0.9999	YIL143C	>0.9999
YBR233W-A	6.52	6.45	6.51	6.59	6.67	6.62	6.55	6.51	6.37	6.91	7.02	7.16	6.97	7.02	6.64	6.73													YDR068W	>0.9999	YFR032C-A	>0.9999	YCR067C	>0.9999	YDR323C	>0.9999
YBR234C	9.76	10.18	9.67	9.84	10.08	10.03	9.99	9.89	10.08	10.07	9.87	9.84	10.39	10.36	10.01	10.06													YGL117W	>0.9999	YLR083C	0.2069	YPL213W	>0.9999	YKL011C	>0.9999
YBR235W	6.97	7.16	6.88	7.13	6.9	6.93	7.08	7.01	7.4	6.92	6.49	6.52	6.86	6.89	7.12	6.98													YHR020W	>0.9999	YKR098C	>0.9999	YER073W	>0.9999	YOR394C-A	>0.9999
YBR236C	8.39	8.41	8.14	8.38	8.34	8.33	8.26	8.32	8.36	8.41	8.75	8.69	8.09	8.55	8.41	8.29													YPL137C	>0.9999	YBR217W	>0.9999	YIL139C	>0.9999	YPL120W	>0.9999
YBR237W	7.63	7.71	7.21	7.18	7.75	7.45	7.15	7.18	7.77	7.66	6.84	6.93	7.56	7.44	7.03	7.07													YER023W	>0.9999	YDR372C	>0.9999	YMR117C	>0.9999	YNR044W	>0.9999
YBR238C	7.72	6.95	7.82	6.68	6.38	6.59	6.38	6.26	6.67	7.47	6.3	6.29	6.23	6.03	6.39	6.34													YFL012W	0.7564	YHR207C	>0.9999	YGR168C	>0.9999	YPL243W	>0.9999
YBR239C	6.56	6.73	6.48	6.35	6.61	6.18	6.43	6.33	6.46	6.76	6	5.99	6.7	6.55	6.46	6.29													YJL046W	>0.9999	YER089C	>0.9999	YGR227W	>0.9999	YLR253W	>0.9999
YBR240C	4.8	4.93	5.24	4.94	5.26	5.07	5.32	5.28	5.35	5.03	4.93	5.09	4.84	5.16	5.5	5.31													YDL159W-A	>0.9999	YNR052C	>0.9999	YPL256C	0.9968	YLR303W	>0.9999
YBR241C	7.03	7.71	6.98	7.42	7.43	7.4	7.87	7.84	7.99	7.18	7.07	6.95	7.16	7.29	8.02	7.98													YML009C	>0.9999	YHR073W	0.9081	YML116W	>0.9999	YOR179C	>0.9999
YBR242W	8.34	8.32	8.11	7.82	7.66	8.11	7.54	7.69	7.75	8.37	8.04	8.13	8	7.98	7.56	7.64													YDR539W	>0.9999	YKR083C	0.9989	YOR254C	>0.9999	YOR361C	>0.9999
YBR243C	8.27	8.54	8.71	8.63	8.27	8.23	8.57	8.61	7.94	8.31	8.68	8.68	8.67	8.49	8.57	8.68													YFL029C	>0.9999	YDR403W	0.943	YDR172W	>0.9999	YBR031W	>0.9999
YBR244W	8.48	8.17	8.54	8.54	7.97	8.76	8.47	8.16	8.51	8.35	8.83	8.72	8.19	7.95	7.85	7.89													YER086W	>0.9999	YKL211C	0.9885	YGR249W	>0.9999	YDL133W	>0.9999
YBR245C	8.54	8.56	8.32	8.21	8.32	8.35	7.88	8	8.11	8.8	8.28	8.28	8.63	8.42	7.89	7.98													YDR508C	>0.9999	YMR145C	0.1873	YBL107C	>0.9999	YPR008W	>0.9999
YBR246W	7.43	7.88	7.7	7.5	7.4	7.54	7.7	7.7	7.37	7.37	7.67	7.72	7.75	7.65	7.66	7.61													YCL018W	0.5349	YER186C	>0.9999	YBR249C	>0.9999	YGL091C	>0.9999
YBR247C	8.84	8.58	8.87	8.17	7.39	8.01	7.48	7.61	7.61	8.7	8.13	8.27	7.84	7.63	7.21	7.32													YER036C	>0.9999	YJL139C	0.5621	YHL014C	>0.9999	YOR011W-A	>0.9999
YBR248C	9.9	9.83	10.12	10.04	10.1	9.99	10.17	9.82	10	9.86	9.53	9.59	10.17	10.16	9.77	9.56													YJL111W	>0.9999	YLR389C	0.4218	YGR277C	>0.9999	YLR093C	>0.9999
YBR249C	10.49	10.63	11.24	11.08	10.5	10.58	11.29	11.04	10.3	10.55	10.59	10.5	10.41	10.66	10.82	10.66													YMR167W	>0.9999	YGR087C	>0.9999	YLR047C	>0.9999	YGL240W	>0.9999
YBR250W	3.95	4.17	4.15	3.94	4.52	3.92	4.3	4.25	4.31	4.25	3.91	3.98	4.11	4.11	4.09	4.09													YCL048W	>0.9999	YOR122C	>0.9999	YDR023W	>0.9999	YOR382W	0.4195
YBR251W	7.25	7.63	7.5	7.51	7.68	7.77	7.57	7.6	7.16	7.62	7.75	7.81	7.92	8.02	7.58	7.62													YJR135W-A	>0.9999	YER087W	>0.9999	YOR037W	>0.9999	YML079W	>0.9999
YBR252W	9.11	9.42	9.22	9.27	9.28	9.47	9.27	9.15	9.36	9.27	9.62	9.66	9.17	9.36	9.25	9.25													YOL107W	>0.9999	YMR115W	>0.9999	YPR091C	>0.9999	YLR170C	>0.9999
YBR253W	9.08	8.91	8.31	8.53	9.14	9.14	8.58	8.43	9.05	9.12	8.71	8.75	9.29	9.19	8.62	8.63													YNL238W	>0.9999	YKL168C	>0.9999	YDR312W	>0.9999	YER048W-A	>0.9999
YBR254C	6.94	6.82	7.28	6.99	6.79	7.21	7.08	7.01	6.97	6.87	7.49	7.41	7	7.06	7.03	7.06													YHR001W-A	>0.9999	YGL030W	>0.9999	YFR009W	>0.9999	YDR541C	>0.9999
YBR255C-A	7.21	7.78	7.7	7.74	7.67	7.65	8.02	8.17	7.84	7.61	8.17	7.91	7.91	7.98	8.25	8.21													YBL059W	>0.9999	YHR114W	>0.9999	YOL002C	>0.9999	YPR045C	>0.9999
YBR255W	7.28	7.49	6.78	6.99	7.32	7.01	6.99	6.86	6.95	7.34	6.8	6.78	7.48	7.35	6.78	6.83													YHR007C-A	>0.9999	YDR373W	0.9998	YEL073C	>0.9999	YLR097C	>0.9999
YBR256C	8.28	8.59	8.88	8.97	9.1	9.11	9.73	9.05	8.96	8.2	8.87	8.87	8.74	8.92	8.98	8.68													YKL070W	>0.9999	YOL005C	>0.9999	YPL005W	>0.9999	YBR196C	>0.9999
YBR257W	7.66	7.42	7.32	7.02	7.09	7.32	6.88	6.77	7.63	7.59	7.13	7.18	7.38	7.15	6.68	6.66													YOL012C	>0.9999	YGR153W	0.9923	YLR044C	>0.9999	YPL252C	>0.9999
YBR258C	6.23	6.19	6.07	6.15	6.18	6.17	6.1	6.09	6.26	6.3	6.28	6.18	6.41	6.22	6.04	5.96													YEL065W	>0.9999	YNL330C	>0.9999	YGL189C	>0.9999	YOL159C-A	>0.9999
YBR259W	6.03	6.01	6.15	6.02	5.66	5.58	5.95	5.96	5.97	5.93	5.94	5.86	5.97	5.75	5.93	5.94													YDR091C	>0.9999	YLR091W	>0.9999	YDR256C	>0.9999	YCR008W	>0.9999
YBR260C	8.83	8.65	9.2	8.98	9.52	9.32	9.14	8.94	9.36	8.56	8.47	8.63	8.58	9.05	9.03	9.41													YMR243C	>0.9999	YPL254W	>0.9999	YCR053W	>0.9999	YHL002W	>0.9999
YBR261C	8.63	8.71	8.7	8.5	8.29	8.49	8.42	8.47	8.7	8.64	8.71	8.79	8.34	8.46	8.49	8.5													YML003W	>0.9999	YOL108C	0.0993	YLR417W	>0.9999	YNL262W	>0.9999
YBR262C	8.42	8.7	8.6	8.46	8.78	8.83	8.68	8.56	8.98	8.72	8.72	8.75	8.67	8.83	8.57	8.48													YDR336W	>0.9999	YBL023C	>0.9999	YNR007C	>0.9999	YPL216W	>0.9999
YBR263W	10.63	10.88	10.61	10.59	10.45	10.67	10.43	10.45	10.62	10.61	10.34	10.32	10.71	10.67	10.48	10.43													YLR013W	>0.9999	YPR043W	>0.9999	YER069W	>0.9999	YLR326W	>0.9999
YBR264C	7.55	7.71	7.66	7.57	8.08	7.88	7.74	7.71	7.66	7.36	7.92	8.03	7.86	7.75	7.82	7.75													YGL144C	>0.9999	YGR063C	0.995	YDR322C-A	>0.9999	YCL034W	>0.9999
YBR265W	9.11	9.14	8.99	9.11	9.32	9.37	9.16	9.24	9.07	9.07	9.16	9.13	9.41	9.44	9.31	9.25													YDR233C	>0.9999	YMR309C	0.2281	YMR165C	>0.9999	YNL037C	>0.9999
YBR267W	8.7	8.52	8.97	8.08	7.49	7.81	7.45	7.49	8.06	8.76	8.05	8.2	8.03	7.56	7.2	7.08													YCR060W	>0.9999	YOR336W	0.0631	YPL271W	>0.9999	YNL124W	>0.9999
YBR268W	7.56	7.9	7.58	7.74	7.69	7.82	7.78	7.68	7.9	7.95	8.02	8.06	7.84	7.94	7.77	7.68													YER004W	>0.9999	YNL149C	>0.9999	YHL006C	>0.9999	YFR032C	>0.9999
YBR269C	9.45	9.61	9.1	9.41	9.35	9.35	9.53	9.57	9.75	9.37	9.5	9.39	8.83	9	9.58	9.45													YER018C	>0.9999	YKL156W	>0.9999	YER142C	>0.9999	YNL245C	>0.9999
YBR270C	6.38	6.74	6.11	5.95	6.36	6.15	5.98	5.98	6.4	6.52	5.9	5.95	6.71	6.4	6.01	6.02													YDR129C	>0.9999	YER157W	>0.9999	YLR342W	>0.9999	YGR094W	>0.9999
YBR271W	6.91	6.8	7.18	6.63	5.87	6.27	6.14	6.1	6.19	6.91	6.72	6.88	6.51	6.2	6.03	6.05													YDR192C	>0.9999	YJR143C	0.9833	YFL059W	>0.9999	YEL044W	>0.9999
YBR272C	5.92	6.14	6.12	6.37	6.15	6.25	6.47	6.24	6.17	6.17	6.69	6.65	6.17	6.21	6.38	6.45													YBR297W	>0.9999	YOR260W	0.8354	YDL085C-A	0.3267	YKR020W	>0.9999
YBR273C	7.4	7.32	7.28	7.42	7.28	7.46	7.5	7.35	7.6	7.32	7.47	7.47	6.99	7.13	7.48	7.31													YLR164W	>0.9999	YGR212W	>0.9999	YLR053C	>0.9999	YGL245W	>0.9999
YBR274W	7.31	7.44	7.25	7.34	7.05	7.34	7.23	7.18	7.33	6.98	7.39	7.45	7.02	7.16	7.19	7.17													YMR073C	>0.9999	YGL189C	>0.9999	YKL149C	>0.9999	YLR373C	>0.9999
YBR275C	6.9	6.9	6.72	6.41	6.49	6.58	6.17	6.27	6.68	7.3	6.56	6.57	6.99	6.83	6.16	6.19													YBR255C-A	>0.9999	YOL130W	0.0794	YBL081W	>0.9999	YDL165W	>0.9999
YBR276C	8.37	8.64	8.25	8.29	8.83	8.58	8.33	8.25	8.85	8.44	8.17	8.21	8.92	8.92	8.38	8.36													YOR060C	>0.9999	YOR342C	0.9969	YIL090W	>0.9999	YDR201W	>0.9999
YBR278W	6.62	6.29	6.51	6.67	6.74	6.73	6.64	6.68	7.21	6.48	6.72	6.8	6.58	6.7	6.78	6.77													YBR293W	>0.9999	YDR522C	>0.9999	YDR189W	>0.9999	YOR064C	>0.9999
YBR279W	9.22	9.29	8.99	8.97	9.24	9.08	8.85	8.75	9.17	9.21	9	9.04	9.32	9.32	8.74	8.83													YJL013C	>0.9999	YGR183C	>0.9999	YGR257C	>0.9999	YOR109W	>0.9999
YBR280C	5.72	6.47	5.85	6.31	6.49	6.24	6.56	6.61	6.72	5.86	6.18	6.2	6.45	6.58	6.63	6.65													YOR332W	>0.9999	YGR266W	>0.9999	YKR074W	>0.9999	YDR111C	>0.9999
YBR281C	7.38	7.37	7.21	7.4	7.21	7.19	7.33	7.49	7.16	7.24	7.34	7.22	7.48	7.29	7.34	7.39													YDR179C	>0.9999	YHR067W	>0.9999	YOR022C	>0.9999	YNL218W	>0.9999
YBR282W	8.15	8.42	8.11	8.32	8.39	8.59	8.25	8.17	8.5	8.34	8.47	8.54	8.28	8.36	8.21	8.12													YDR524W-A	>0.9999	YCR071C	0.9923	YOL036W	>0.9999	YLR260W	>0.9999
YBR283C	11.33	11.54	11.19	11.2	11.34	11.43	11.04	11.12	11.37	11.43	10.93	10.99	11.44	11.41	11.11	11.1													YKL095W	>0.9999	YDR226W	>0.9999	YIL143C	>0.9999	YLR027C	>0.9999
YBR284W	4.29	4.85	4.52	4.54	5.86	5.07	4.89	4.87	5.26	4.76	4.26	4.36	5.48	5.45	4.93	4.93													YFL060C	>0.9999	YLL018C	0.9885	YDR323C	>0.9999	YPR182W	>0.9999
YBR285W	5.07	5.59	4.67	5.11	6.47	5.65	5.57	5.36	6.97	5.12	5.04	4.99	4.95	5.4	5.87	5.72													YHR003C	>0.9999	YMR315W-A	0.1527	YKL011C	0.9989	YLR286C	>0.9999
YBR286W	11.27	11.67	11.04	11.16	11.49	11.49	11.28	11.28	11.61	11.17	10.97	10.91	11.29	11.46	11.21	11.14													YDR212W	>0.9999	YLR213C	>0.9999	YOR394C-A	0.2273	YHR188C	>0.9999
YBR287W	8.85	9.2	9.27	9.4	9.04	9.28	9.45	9.58	9.23	8.99	9.51	9.45	9.32	9.44	9.69	9.84													YOR373W	>0.9999	YOL027C	>0.9999	YPL120W	>0.9999	YMR213W	>0.9999
YBR288C	8.14	8.15	8.27	8.22	7.95	8.08	8.12	8.13	8.13	8.03	8.44	8.44	8.11	8.15	8.13	8.11													YKR062W	>0.9999	YAL016W	>0.9999	YNR044W	>0.9999	YKL051W	0.9392
YBR289W	8.26	8.31	7.89	7.86	8.47	8.12	7.86	7.91	7.9	8.35	7.63	7.67	8.3	8.29	7.98	7.97													YKL132C	>0.9999	YOL026C	>0.9999	YPL243W	>0.9999	YLR291C	>0.9999
YBR290W	8.1	7.81	7.92	8.05	8.12	7.88	8.1	7.98	7.88	8.1	8.2	8.32	8.06	8.23	7.97	8.06													YML025C	>0.9999	YOR246C	>0.9999	YLR253W	>0.9999	YER130C	>0.9999
YBR291C	9.74	10.02	10.23	9.91	9.67	9.77	9.86	9.73	9.71	9.87	9.74	9.51	9.94	9.85	9.58	9.41													YFL051C	>0.9999	YLR082C	>0.9999	YLR303W	>0.9999	YIL065C	>0.9999
YBR293W	6.7	6.99	6.33	6.67	6.19	6.35	6.62	6.45	6.37	6.47	6.29	6.49	6.36	6.18	6.35	6.29													YDR443C	>0.9999	YLR010C	0.9081	YOR179C	>0.9999	YLR185W	>0.9999
YBR294W	11.79	11.85	10.88	11.46	10.78	11.11	10.79	10.99	11.14	11.49	10.98	11.1	11.28	10.84	10.74	10.76													YPR176C	>0.9999	YPL115C	>0.9999	YOR361C	>0.9999	YAL033W	>0.9999
YBR295W	6.36	7.17	6.46	6.24	6.54	6.25	6.57	6.44	7.45	6.44	6.21	6.09	6.45	6.48	6.82	6.89													YOR337W	>0.9999	YPR042C	0.8062	YBR031W	>0.9999	YNL194C	0.9997
YBR296C	8.4	6.56	9.36	7.58	5.87	7.05	5.97	6.85	7.04	7.82	6.37	6.55	6.32	5.35	5.94	6.64													YBR030W	>0.9999	YCL032W	>0.9999	YDL133W	>0.9999	YOR271C	>0.9999
YBR296C-A	2.25	2.47	2.02	1.78	2.17	1.94	1.11	2.07	2.72	1.89	1.86	1.73	1.82	1.51	1.35	1.43													YIL082W-A	>0.9999	YGL136C	>0.9999	YPR008W	>0.9999	YOR356W	>0.9999
YBR297W	3.71	4.39	4.01	4.01	3.86	3.42	4.08	3.95	5.48	4.09	4.32	4.42	3.94	4.18	4.04	4.07													YDR476C	>0.9999	YKL154W	>0.9999	YGL091C	>0.9999	YLR190W	>0.9999
YBR298C	4.48	5	4.5	4.82	5.42	5.14	5.1	4.75	5.32	4.57	4.21	4.37	4.98	5.57	4.87	5.16													YGR021W	>0.9999	YLR288C	>0.9999	YLR093C	>0.9999	YER046W	>0.9999
YBR298C-A	3.84	3.49	3.05	2.49	5.19	3.37	1.83	2.15	3.37	3.41	2.14	2.19	3.39	3.1	2.35	2.57													YOR380W	>0.9999	YBR090C	>0.9999	YOR382W	>0.9999	YDR279W	>0.9999
YBR299W	3.97	4.29	3.76	3.77	4.74	3.85	3.16	3.05	4.1	4.06	3.33	3.58	3.71	3.33	3.41	3.38													YDL175C	>0.9999	YPL071C	>0.9999	YML079W	>0.9999	YEL019C	>0.9999
YBR301W	4.04	4.17	4.16	3.99	4.54	4.14	3.92	4.42	4.63	4.11	3.95	4.08	3.98	4.05	4.53	4.09													YMR062C	>0.9999	YFR046C	>0.9999	YLR170C	>0.9999	YER146W	>0.9999
YBR302C	9.77	10.07	10.17	10.33	10.76	10.43	10.72	10.64	10.9	9.82	10.26	10.2	10.61	10.8	10.99	10.9													YDR173C	>0.9999	YDL109C	0.9676	YER048W-A	>0.9999	YNL144C	0.9692
YCL001W	9.42	9.38	9.63	9.7	9.57	9.69	9.65	9.64	9.34	9.53	9.86	9.78	9.52	9.49	9.61	9.67													YHR007C	>0.9999	YMR129W	0.7073	YDR541C	>0.9999	YMR292W	>0.9999
YCL001W-A	4.27	4.55	4.04	4.05	4.73	4.16	4.16	3.86	3.92	4.53	4.16	4.5	5.03	4.93	3.97	3.9													YDR477W	>0.9999	YCR067C	0.9981	YPR045C	>0.9999	YKL183W	>0.9999
YCL001W-B	2.43	2.54	1.32	1.44	2.33	2.09	1.51	1.84	1.43	2.65	2.1	2.54	2.24	2.3	1.44	1.83													YKL185W	>0.9999	YPL213W	0.995	YLR097C	>0.9999	YOR384W	>0.9999
YCL002C	7.18	6.97	7.68	7.5	7.08	7.15	7.55	7.55	7.12	7.22	7.64	7.71	7.34	7.28	7.61	7.56													YER057C	>0.9999	YIL139C	>0.9999	YBR196C	>0.9999	YGL071W	>0.9999
YCL004W	7.37	7.69	6.83	7.01	7.53	7.3	6.94	7.06	7.15	7.41	7.01	7.09	7.73	7.73	7.02	7.14													YAL027W	>0.9999	YMR117C	>0.9999	YPL252C	>0.9999	YBL095W	>0.9999
YCL005W	6.93	7.16	7.26	7.2	6.72	6.96	7.25	7.27	6.73	6.92	7.46	7.47	7	7.12	7.17	7.26													YJR017C	>0.9999	YGR168C	>0.9999	YOL159C-A	>0.9999	YKL133C	>0.9999
YCL005W-A	10.51	10.69	10.24	10.43	10.89	10.69	10.55	10.55	10.63	10.63	10.59	10.59	11.11	11.16	10.6	10.62													YJR024C	>0.9999	YGR227W	>0.9999	YCR008W	>0.9999	YJL031C	>0.9999
YCL008C	7.42	7.61	7.18	7.35	7.42	7.17	7.41	7.39	7.2	7.36	6.84	6.83	7.34	7.34	7.41	7.32													YBR118W	>0.9999	YML116W	>0.9999	YHL002W	>0.9999	YKR008W	>0.9999
YCL009C	11.31	11.51	11.41	11.47	11.37	11.26	11.56	11.37	11.19	11.35	11.11	11.11	11.69	11.6	11.37	11.14													YMR203W	>0.9999	YOR254C	>0.9999	YNL262W	>0.9999	YPL152W-A	>0.9999
YCL010C	7.16	7.73	6.63	6.67	7.29	7.27	6.6	6.68	7.56	7.01	6.62	6.72	7.46	7.48	6.76	6.66													YJR151W-A	>0.9999	YDR172W	>0.9999	YPL216W	0.9997	YMR237W	>0.9999
YCL011C	10.02	10.11	9.94	9.89	10.12	9.9	9.8	9.8	10	9.88	9.91	9.92	10.1	10.01	9.66	9.67													YPR049C	>0.9999	YGR249W	>0.9999	YLR326W	>0.9999	YIL071C	>0.9999
YCL012C	8.08	8.36	7.85	7.94	8.12	8.37	8.02	7.9	8.28	8.06	8.14	8.17	7.8	7.86	7.95	7.91													YOL007C	>0.9999	YBL107C	>0.9999	YCL034W	>0.9999	YDR011W	>0.9999
YCL014W	7.61	7.69	7.38	7.38	7.66	7.31	7.1	7.1	7.08	7.62	7.36	7.38	7.76	7.73	7.15	7.24													YFR041C	>0.9999	YBR249C	0.0794	YNL037C	>0.9999	YDR313C	>0.9999
YCL016C	5.95	6.04	6.11	6.11	5.41	5.74	6.1	6.02	5.37	5.9	6.23	6.31	5.77	5.83	6.02	6.1													YGR035W-A	>0.9999	YHL014C	>0.9999	YNL124W	0.9241	YJL047C	>0.9999
YCL017C	8.7	8.84	8.92	8.86	8.42	8.93	8.78	8.87	9.01	8.61	8.71	8.69	8.45	8.43	8.96	8.93													YGL178W	>0.9999	YGR277C	>0.9999	YNL245C	>0.9999	YHR105W	>0.9999
YCL018W	3.92	3.28	4.06	4.07	4.2	4.36	3.81	4.08	3.88	3.64	3.66	3.59	3.3	3.51	4.03	3.92													YNL225C	>0.9999	YLR047C	0.1873	YGR094W	>0.9999	YEL059C-A	>0.9999
YCL021W-A	5.43	6.23	5.42	5.26	6.41	5.79	5.44	5.31	5.89	6.06	5.16	5.07	6.39	6.02	5.42	5.52													YER074W-A	>0.9999	YNL160W	>0.9999	YEL044W	>0.9999	YIL137C	>0.9999
YCL024W	7.32	7.16	6.95	7.2	7.94	7.4	7.35	7.36	7.15	7.56	7.33	7.15	7.6	7.6	7.42	7.38													YHR091C	>0.9999	YDR023W	>0.9999	YKR020W	>0.9999	YNL090W	>0.9999
YCL025C	10.58	10.64	11.46	11.4	11.26	10.87	11.82	11.84	11.21	10.27	11.39	11.33	11.51	11.55	11.98	11.97													YDR354W	>0.9999	YOR037W	>0.9999	YGL245W	>0.9999	YJR057W	>0.9999
YCL026C-A	3.9	4.31	4.37	4.01	4.86	3.77	4.25	4.06	4.16	4.1	4.28	4.18	4.21	4.17	4.5	4.43													YNL241C	>0.9999	YPR091C	>0.9999	YLR373C	>0.9999	YML029W	>0.9999
YCL026C-B	6.35	7.13	7.77	7.73	6.81	6.49	8.43	8.38	6.02	6.53	8.81	8.66	6.39	6.43	9.02	9.25													YJL088W	>0.9999	YDR312W	>0.9999	YDL165W	>0.9999	YGL125W	>0.9999
YCL027W	4.1	4.52	4.53	4.26	5.13	4.25	4.88	4.66	4.21	4.42	4.31	4.23	4.57	4.43	4.79	4.71													YDR034W-B	>0.9999	YFR009W	>0.9999	YDR201W	>0.9999	YGL047W	>0.9999
YCL028W	9.35	9.25	9.13	9.14	9.39	9.4	9.2	9.09	9.56	9.34	8.77	8.68	9.13	9.18	9.2	9.04													YMR079W	>0.9999	YOL002C	>0.9999	YOR064C	>0.9999	YOR111W	>0.9999
YCL029C	7.33	7.2	7.2	7.07	7.02	6.95	6.87	6.84	7.21	7.26	6.93	6.94	7.25	7.13	6.88	6.82													YHL015W-A	>0.9999	YEL073C	0.0794	YOR109W	>0.9999	YBR072C-A	>0.9999
YCL030C	11.45	11.68	11.85	11.9	11.67	11.67	12.08	11.85	11.37	11.46	11.35	11.21	11.66	11.7	11.73	11.48													YHR209W	>0.9999	YPL005W	>0.9999	YDR111C	>0.9999	YGL131C	>0.9999
YCL031C	8.81	8.7	8.99	8.74	8.22	8.49	8.58	8.57	8.18	8.78	9.16	9.14	8.22	8.28	8.21	8.39													YLR043C	>0.9999	YLR044C	>0.9999	YNL218W	>0.9999	YLR437C	>0.9999
YCL032W	6.19	6.3	6.12	6.25	6.01	5.93	6.01	6.11	6.25	6.27	6.37	6.51	6.07	6.39	6.15	6.16													YER153C	>0.9999	YGL189C	>0.9999	YLR260W	>0.9999	YDR251W	>0.9999
YCL033C	7.48	7.91	7.44	7.7	7.55	7.88	7.87	7.78	8.88	7.65	7.9	7.87	7.19	7.54	8.03	7.9													YKL090W	>0.9999	YDR256C	0.7073	YLR027C	>0.9999	YPL016W	>0.9999
YCL034W	8.11	8.36	7.85	8.24	8.26	8.46	8.16	8.22	8.42	8.19	8.34	8.34	8.38	8.62	8.3	8.36													YCR030C	>0.9999	YCR053W	>0.9999	YPR182W	>0.9999	YGR189C	>0.9999
YCL035C	10.22	10.58	9.82	10.07	10.49	10.45	10.24	10.37	10.63	10.38	10.23	10.12	10.51	10.57	10.44	10.37													YDR178W	>0.9999	YLR417W	>0.9999	YLR286C	>0.9999	YDR012W	>0.9999
YCL036W	7.76	7.41	7.9	6.83	6.26	6.78	6	6.12	6.03	7.63	6.96	6.97	7.05	6.65	5.84	5.8													YGR240C-A	>0.9999	YNR007C	>0.9999	YHR188C	>0.9999	YDR068W	>0.9999
YCL037C	11.08	10.63	10.82	10.41	10.75	10.72	10.13	10.18	10.25	11.07	10.17	10.2	10.52	10.64	10.04	10.12													YLL023C	>0.9999	YDR322C-A	>0.9999	YMR213W	>0.9999	YHR020W	>0.9999
YCL038C	6.43	6.78	6.61	6.83	7.04	7.03	7.23	7.18	7.98	6.51	6.64	6.6	6.74	6.89	7.43	7.35													YHR131C	>0.9999	YMR165C	>0.9999	YKL051W	>0.9999	YPL137C	>0.9999
YCL039W	7.97	8.77	7.68	7.87	8.72	8.55	8.11	8.07	8.89	8.03	7.79	7.67	8.46	8.65	8.16	8.21													YBR108W	>0.9999	YPL271W	>0.9999	YLR291C	>0.9999	YER023W	>0.9999
YCL040W	9.98	11.05	9.79	10.54	11.08	11	10.82	10.74	10.77	9.9	10.26	10.04	9.96	10.73	10.83	10.8													YGR105W	>0.9999	YHL006C	>0.9999	YER130C	>0.9999	YFL012W	>0.9999
YCL042W	3.8	3.67	4.03	4.75	4.88	4.75	4.82	5.03	4.33	3.22	4.45	4.2	3.41	3.79	4.99	4.83													YOL060C	>0.9999	YER142C	0.3585	YGR234W	>0.9999	YJL046W	>0.9999
YCL043C	11.15	11.82	11.25	11.27	11.47	11.16	11.26	11.41	11.17	11.35	11.19	11.12	11.5	11.44	11.43	11.48													YER060W-A	>0.9999	YLR342W	0.1375	YIL065C	>0.9999	YDL159W-A	>0.9999
YCL044C	7.5	7.47	7.39	7.33	7.33	7.24	7.33	7.25	7.14	7.25	7.04	7.11	6.99	7.07	7.3	7.31													YLR011W	>0.9999	YFL059W	0.1375	YLR185W	>0.9999	YML009C	>0.9999
YCL045C	10.4	10.58	10.07	10.2	10.36	10.27	10.09	10.01	10.21	10.38	9.79	9.75	10.27	10.25	10.05	10.11													YHR027C	>0.9999	YDL085C-A	0.2281	YAL033W	>0.9999	YDR539W	0.9985
YCL047C	6.57	6.96	7.26	7.06	6.92	7	7.22	7.24	7.1	6.79	7.63	7.62	7.05	7.16	7.2	7.34													YKL141W	>0.9999	YLR053C	0.7749	YNL194C	>0.9999	YFL029C	>0.9999
YCL048W	3.18	3.68	3.36	2.98	4.16	3.73	3.48	3.41	4.05	3.9	4.01	4.38	3.78	3.9	3.22	3.53													YOR161C	>0.9999	YKL149C	>0.9999	YOR271C	>0.9999	YER086W	>0.9999
YCL049C	5.68	6.16	6.8	6.57	6.8	6.53	7.7	7.64	7.71	5.9	6.67	6.57	6.17	6.64	7.95	7.85													YMR175W-A	>0.9999	YIL090W	>0.9999	YOR356W	>0.9999	YDR508C	>0.9999
YCL050C	10.15	10.44	9.92	10.05	10.06	10.09	9.95	9.92	10.21	10.07	9.99	9.99	9.86	10.05	10	10.07													YIL138C	>0.9999	YDR189W	>0.9999	YOL058W	>0.9999	YCL018W	>0.9999
YCL051W	7.1	7.52	6.86	7.08	7.65	7.26	7.06	7.1	7.19	7.23	6.98	6.98	7.48	7.63	7.13	7.21													YKL213C	>0.9999	YGR257C	>0.9999	YLR190W	>0.9999	YER036C	>0.9999
YCL052C	7.73	7.8	8.04	8.08	8.24	8.13	8.46	8.33	8.11	7.74	8.1	8.04	7.9	7.93	8.37	8.36													YBR129C	0.1765	YOR383C	0.995	YER046W	>0.9999	YJL111W	>0.9999
YCL054W	10.57	10.09	10.07	9.46	9.72	9.74	8.82	8.83	9.66	10.61	9.26	9.34	10.04	9.75	8.77	8.74													YOR058C	>0.9999	YKR074W	0.7418	YPL250C	>0.9999	YMR167W	>0.9999
YCL055W	5.78	5.71	6.13	6.01	5.74	5.88	6	6.1	5.3	5.79	6.29	6.28	5.74	5.62	5.8	6.09													YCR105W	>0.9999	YOR022C	>0.9999	YDR279W	>0.9999	YCL048W	>0.9999
YCL056C	8.41	8.56	8.5	8.45	8.5	8.51	8.61	8.59	8.89	8.23	8.56	8.64	8.48	8.47	8.59	8.58													YGR097W	>0.9999	YOL036W	0.8865	YER146W	>0.9999	YJR135W-A	>0.9999
YCL057C-A	11.24	11.46	10.56	10.82	11.42	11.4	10.78	10.76	11.7	11.47	10.67	10.66	11.17	11.26	11	10.87													YJR060W	>0.9999	YIL143C	0.9998	YMR292W	>0.9999	YOL107W	>0.9999
YCL057W	9.21	9.68	9.08	9.14	9.05	8.96	9.1	9.16	9.38	9.37	9.05	8.81	9.17	9.22	9.21	9.26													YMR299C	>0.9999	YDR323C	>0.9999	YKL183W	>0.9999	YNL238W	>0.9999
YCL058C	5.08	4.85	5.41	5.09	5.14	5.16	5.01	5.06	5.25	4.88	4.75	5.04	4.89	4.66	4.96	5.13													YLR099C	>0.9999	YKL011C	0.9998	YGL071W	0.9825	YHR001W-A	>0.9999
YCL059C	9.15	8.63	8.72	8.62	8.15	8.73	8.02	8	8.24	9.14	8.85	8.89	8.44	8.58	7.8	7.68													YDR446W	>0.9999	YPL120W	>0.9999	YBL095W	>0.9999	YBL059W	>0.9999
YCL061C	9.16	8.94	8.83	9.17	10.2	9.97	9.6	9.46	10.18	9.17	8.57	8.52	9.36	9.93	9.87	9.87													YKL089W	>0.9999	YPL243W	>0.9999	YKL133C	>0.9999	YHR007C-A	>0.9999
YCL063W	7.09	6.77	7.3	7.18	6.89	6.98	7.13	7.11	6.37	7.04	7.08	7.14	6.86	6.89	7.11	7.08													YOL091W	>0.9999	YLR253W	>0.9999	YDL183C	>0.9999	YKL070W	>0.9999
YCL064C	5.92	6.28	5.34	5.51	5.61	4.98	5.14	5.24	5.21	5.84	5.26	5.12	5.65	5.4	5.19	5.07													YBR017C	>0.9999	YLR303W	>0.9999	YJL031C	>0.9999	YOL012C	>0.9999
YCL066W	4.42	4.86	4.01	4.19	4.57	4.27	3.9	3.77	4.12	4.72	4.39	4.38	4.49	4.27	3.73	3.67													YGR045C	>0.9999	YOR179C	>0.9999	YKR008W	>0.9999	YDR091C	>0.9999
YCL068C	5.37	4.94	4.98	4.66	6.39	5.23	4.49	4.67	5.16	5.44	4.79	5.16	5.48	5.71	4.7	4.52													YKR015C	>0.9999	YOR361C	>0.9999	YPL152W-A	>0.9999	YMR243C	>0.9999
YCL069W	4.13	3.7	3.42	2.53	5.55	3.17	2.82	3.09	3.66	4.38	3	2.98	4.14	3.86	2.63	2.64													YLR102C	>0.9999	YBR031W	>0.9999	YMR237W	>0.9999	YML003W	>0.9999
YCL073C	4.97	5.53	4.67	4.32	5.81	5.14	4.42	4.8	5.75	5.11	4.5	4.69	5.18	5.47	4.88	4.69													YER175C	>0.9999	YDL133W	>0.9999	YIL071C	>0.9999	YDR336W	>0.9999
YCR002C	9.52	9.91	9.66	9.79	9.66	9.76	9.78	9.78	9.98	9.43	9.52	9.62	9.67	9.64	9.82	9.88													YNL135C	>0.9999	YPR008W	0.9764	YDR011W	>0.9999	YLR013W	>0.9999
YCR003W	7.85	8.27	7.77	7.87	8.23	8.22	7.95	7.88	8.14	8.13	8.2	8.22	8.21	8.37	7.86	7.91													YHR018C	>0.9999	YGL091C	0.9565	YDR313C	0.9997	YGL144C	>0.9999
YCR004C	10.19	10.65	10.11	10.31	10.37	10.38	10.32	10.48	10.29	10.45	10.54	10.34	10.45	10.51	10.41	10.44													YDR262W	>0.9999	YOR011W-A	>0.9999	YHR105W	>0.9999	YDR233C	>0.9999
YCR005C	12.15	12.2	11.08	11.97	12.03	11.95	11.87	11.87	12.55	12.11	11.83	11.84	11.99	11.96	12.05	12.07													YPL033C	>0.9999	YLR093C	0.995	YEL059C-A	>0.9999	YCR060W	>0.9999
YCR007C	5.47	5.95	5.33	5.42	5.25	5.52	5.95	5.6	5.56	5.58	5.33	5.2	5.57	5.49	5.93	5.68													YPL209C	>0.9999	YOR382W	0.0631	YIL137C	>0.9999	YER004W	>0.9999
YCR008W	10.16	10.02	9.85	9.81	9.92	9.73	9.52	9.42	9.68	9.83	9.42	9.54	9.72	9.62	9.4	9.52													YDL002C	>0.9999	YML079W	0.9997	YNL090W	>0.9999	YER018C	>0.9999
YCR009C	9.84	9.82	9.68	9.92	9.83	9.97	9.99	9.94	9.9	9.8	10.09	10.03	9.7	9.83	10.03	10.06													YMR015C	>0.9999	YLR170C	0.0889	YJR057W	>0.9999	YDR129C	>0.9999
YCR010C	3.32	3.41	3.73	3.16	3.8	3.62	3.56	3.34	3.67	3.43	3.15	3.6	3.2	3.42	3.31	3.3													YBL017C	>0.9999	YDR541C	>0.9999	YML029W	>0.9999	YDR192C	>0.9999
YCR011C	9.68	9.96	9.4	9.7	9.91	9.95	9.66	9.61	10.13	9.56	9.32	9.26	9.86	9.75	9.62	9.61													YPR016C	>0.9999	YPR045C	0.9981	YGL125W	>0.9999	YBR297W	>0.9999
YCR012W	13.12	13.26	13.24	13.23	13.17	13.15	13.26	13.29	13.11	13.14	13.23	13.21	13.08	13.08	13.28	13.29													YMR066W	>0.9999	YLR097C	0.9269	YGL047W	>0.9999	YLR164W	>0.9999
YCR014C	6.67	6.74	6.56	6.45	7.2	6.8	6.51	6.53	6.57	6.88	6.33	6.31	7.24	7.09	6.59	6.44													YGR110W	>0.9999	YBR196C	>0.9999	YOR111W	>0.9999	YMR073C	>0.9999
YCR015C	6.54	6.86	6.37	6.42	6.35	6.32	6.2	6.14	6.41	6.5	6.7	6.86	6.25	6.16	6.09	6.26													YMR003W	>0.9999	YPL252C	>0.9999	YGL131C	>0.9999	YBR255C-A	>0.9999
YCR016W	8.91	8.86	8.8	8.4	8.19	8.59	7.91	7.97	8.48	8.84	8.57	8.78	8.43	8.44	7.89	7.81													YDR109C	>0.9999	YOL159C-A	0.7749	YLR437C	>0.9999	YOR060C	>0.9999
YCR017C	8.6	8.92	8.88	8.82	9	8.89	8.94	8.99	8.92	8.52	8.38	8.22	9.1	9.01	8.97	8.97													YFL037W	>0.9999	YCR008W	>0.9999	YDR251W	>0.9999	YBR293W	>0.9999
YCR018C	6.27	6.51	4.93	5.03	5.23	4.72	4.7	4.83	7.18	6.14	4.78	4.83	4.99	4.97	5.16	5.38													YMR206W	>0.9999	YHL002W	>0.9999	YGR189C	0.736	YJL013C	>0.9999
YCR019W	6.54	6.58	6.57	6.64	6.38	6.61	6.67	6.8	6.31	6.57	6.81	6.85	6.46	6.55	6.76	6.61													YAL020C	>0.9999	YPL216W	>0.9999	YDR012W	>0.9999	YOR332W	>0.9999
YCR020C	6.29	6.29	6.66	6.77	6.36	6.24	6.72	6.76	6.77	6.23	6.7	6.84	6.43	6.44	6.84	6.86													YDR448W	>0.9999	YLR326W	>0.9999	YDR068W	>0.9999	YDR179C	>0.9999
YCR020C-A	7.91	8.28	7.69	7.92	7.72	8.3	7.92	7.84	8.38	8.06	8.24	8.28	8.04	8.01	7.99	7.87													YJR091C	>0.9999	YCL034W	>0.9999	YGL117W	>0.9999	YKL095W	>0.9999
YCR020W-B	5.53	5.21	5.09	5.49	5.32	5.04	5.14	5.08	4.47	5.82	5.89	5.05	5.94	5.99	4.8	4.62													YDL020C	>0.9999	YNL037C	>0.9999	YHR020W	>0.9999	YFL060C	>0.9999
YCR021C	5.32	5.42	6.1	6	7.42	7.17	6.6	6.64	7.24	5.29	5.66	5.73	6.06	7.48	7.1	7.27													YJL107C	>0.9999	YNL245C	0.9969	YPL137C	>0.9999	YHR003C	>0.9999
YCR023C	7.84	8.2	7.7	8.12	8.19	8.23	8.25	8	8.21	7.86	7.81	8.05	8.43	8.43	8.01	7.95													YDL137W	>0.9999	YGR094W	0.9833	YER023W	>0.9999	YDR212W	>0.9999
YCR024C	6.37	6.61	6.52	6.59	6.62	6.39	6.63	6.65	6.82	6.58	6.4	6.44	6.5	6.52	6.79	6.78													YGL224C	>0.9999	YEL044W	>0.9999	YJL046W	>0.9999	YOR373W	>0.9999
YCR024C-A	10.97	10.65	10.74	11.13	11.25	11.26	11.21	11.01	11.05	10.9	11.02	10.89	10.78	11.04	11.14	10.96													YIR028W	>0.9999	YKR020W	0.8062	YML009C	>0.9999	YKR062W	>0.9999
YCR024C-B	11.85	11.74	11.72	11.66	11.92	11.9	11.76	11.75	11.96	11.73	11.64	11.68	12.01	11.87	11.72	11.66													YNR075C-A	>0.9999	YGL245W	>0.9999	YDR539W	>0.9999	YKL132C	>0.9999
YCR026C	7.05	7.31	6.82	7.03	6.82	6.82	6.77	6.87	7.07	7.08	6.84	6.87	7.05	6.97	6.91	6.87													YMR158W	>0.9999	YLR373C	0.9764	YFL029C	>0.9999	YML025C	>0.9999
YCR027C	6.06	6.11	6.5	6.46	5.76	5.75	6.34	6.48	5.35	6.06	6.84	6.82	5.78	5.84	6.33	6.36													YLR141W	>0.9999	YDL165W	0.9997	YER086W	>0.9999	YFL051C	>0.9999
YCR028C	7.03	7.15	7.43	7.32	6.53	6.82	6.96	7.05	6.66	6.83	7.02	7.03	6.73	6.56	6.99	6.94													YKL120W	>0.9999	YDR201W	>0.9999	YDR508C	>0.9999	YDR443C	>0.9999
YCR028C-A	10.33	10.51	10.38	10.47	10.37	10.54	10.43	10.52	10.54	10.51	10.87	10.81	10.09	10.26	10.5	10.5													YDL210W	>0.9999	YOR064C	>0.9999	YER036C	>0.9999	YPR176C	>0.9999
YCR030C	8.31	8.83	8.24	8.52	8.85	8.61	8.51	8.47	8.46	8.22	8.23	8.17	8.41	8.58	8.48	8.41													YER163C	>0.9999	YOR109W	0.3292	YJL111W	>0.9999	YOR337W	0.9985
YCR031C	12.33	12.52	12.42	12.39	12.37	12.38	12.43	12.46	12.29	12.43	12.49	12.49	12.54	12.51	12.46	12.46													YDL122W	>0.9999	YDR111C	>0.9999	YMR167W	>0.9999	YBR030W	>0.9999
YCR032W	7.31	7.39	6.88	6.84	7.16	7.04	6.82	6.76	7.48	7.36	6.84	6.6	7.59	7.21	6.77	6.67													YDL029W	>0.9999	YNL218W	0.7418	YCL048W	>0.9999	YIL082W-A	>0.9999
YCR033W	8.86	9.02	8.55	8.55	9.12	8.73	8.48	8.54	8.72	8.91	8.15	8.23	9.19	8.91	8.62	8.52													YOR322C	>0.9999	YLR260W	>0.9999	YJR135W-A	>0.9999	YDR476C	>0.9999
YCR034W	10.33	9.77	10.33	10.3	10.1	10.29	10.11	10.13	9.93	10.33	10.23	10.28	10.22	10.16	10.09	10.11													YKL196C	>0.9999	YLR027C	>0.9999	YOL107W	>0.9999	YGR021W	>0.9999
YCR035C	8.49	8.09	8.4	8.18	8	8.14	7.94	7.8	8.18	8.27	8.15	8.31	7.87	7.77	7.72	7.69													YNL231C	>0.9999	YPR182W	>0.9999	YNL238W	>0.9999	YOR380W	>0.9999
YCR036W	7.25	7.63	7.59	7.8	7.54	7.79	8.13	8.02	8.24	7.62	8.09	8.1	7.52	7.68	8.11	8.04													YEL012W	>0.9999	YLR286C	0.5987	YHR001W-A	>0.9999	YDL175C	>0.9999
YCR037C	7.98	8.63	8.24	8.17	7.93	7.93	8.21	8.17	8.08	7.98	8.02	8.04	8.21	8.08	8.11	8.11													YHR204W	>0.9999	YHR188C	0.6717	YBL059W	>0.9999	YDR173C	>0.9999
YCR038C	6.01	6	5.78	5.95	5.75	5.52	5.67	5.93	5.71	5.99	5.86	5.79	5.85	5.89	6.04	6.15													YLR408C	>0.9999	YMR213W	0.2509	YHR007C-A	>0.9999	YHR007C	>0.9999
YCR042C	8.77	9.1	8.49	8.33	8.98	8.6	8.31	8.32	8.49	8.89	8.16	8.12	9.15	8.84	8.2	8.27													YGL061C	>0.9999	YKL051W	>0.9999	YKL070W	>0.9999	YDR477W	>0.9999
YCR043C	8.11	7.82	8.67	8.54	8.07	8.23	8.7	8.69	8.07	8.08	9.01	9.05	8.23	8.09	8.71	8.8													YDL191W	>0.9999	YLR291C	>0.9999	YOL012C	>0.9999	YKL185W	>0.9999
YCR044C	7.61	7.87	8.23	8.14	7.9	7.94	8.22	8.32	7.79	7.66	8.13	8.14	8.01	8.05	8.21	8.25													YLR329W	>0.9999	YER130C	0.9969	YEL065W	>0.9999	YER057C	>0.9999
YCR045C	2.77	2.09	3.74	4.37	3.97	4.45	3.83	3.42	4.95	2.47	2.03	2.12	1.76	2.31	4.06	4													YLR233C	>0.9999	YGR234W	>0.9999	YDR091C	>0.9999	YAL027W	>0.9999
YCR046C	8.93	8.93	9.42	9.32	9.59	9.62	9.53	9.44	9.79	8.84	9.02	8.93	8.57	8.63	9.6	9.59													YGR275W	>0.9999	YIL065C	>0.9999	YMR243C	>0.9999	YJR017C	>0.9999
YCR047C	8.34	8.04	8.27	7.82	7.61	7.96	7.47	7.36	7.9	8.33	7.72	7.8	7.65	7.4	7.3	7.15													YJR088C	0.9365	YLR185W	>0.9999	YML003W	>0.9999	YJR024C	>0.9999
YCR048W	7.43	7.66	7.34	7.23	7.42	7.47	7.42	7.42	8.24	7.43	6.92	6.95	7.51	7.53	7.42	7.33													YIR035C	>0.9999	YAL033W	0.9923	YDR336W	>0.9999	YBR118W	>0.9999
YCR051W	8.87	8.79	8.94	8.63	8.3	8.48	8.31	8.35	9.29	8.93	8.75	8.83	8.66	8.6	8.45	8.31													YOR147W	>0.9999	YNL194C	0.9952	YLR013W	0.1695	YMR203W	>0.9999
YCR052W	8.53	8.88	8.43	8.4	8.15	8.28	8.31	8.42	8.08	8.66	8.45	8.41	8.81	8.56	8.35	8.32													YDL130W	>0.9999	YOR271C	0.9983	YGL144C	0.9997	YJR151W-A	0.9392
YCR053W	11.45	11.76	11.35	11.35	11.12	11.16	11.24	11.22	11.14	11.47	11.11	11.09	11.06	11.16	11.09	11													YIL016W	>0.9999	YOR356W	>0.9999	YDR233C	>0.9999	YPR049C	>0.9999
YCR054C	6.35	6.33	6.8	6.39	5.61	5.8	6.03	6.03	5.81	6.43	6.4	6.43	5.97	5.77	5.86	5.84													YLL027W	>0.9999	YLR190W	0.9924	YCR060W	>0.9999	YOL007C	>0.9999
YCR057C	8.94	8.48	8.87	8.17	7.74	8.13	7.6	7.6	7.6	8.74	8.17	8.22	8.23	7.96	7.28	7.2													YDR515W	>0.9999	YER046W	0.9971	YER004W	>0.9999	YFR041C	>0.9999
YCR059C	8.02	8.03	7.98	7.83	8.17	8.41	7.86	7.81	8.83	7.83	7.77	7.81	8.07	8.13	7.97	7.91													YJL096W	>0.9999	YPL250C	0.9997	YER018C	>0.9999	YGR035W-A	>0.9999
YCR060W	7.25	7.59	7.58	7.45	7.58	7.72	7.75	7.66	8.37	7.45	7.76	7.71	7.7	7.73	7.78	7.75													YKR001C	>0.9999	YDR279W	>0.9999	YDR129C	>0.9999	YGL178W	>0.9999
YCR061W	7.34	7.73	7.21	7.51	8.04	7.83	7.95	7.89	7.74	7.32	6.92	6.62	7.18	7.39	7.86	7.94													YDR385W	>0.9999	YEL019C	0.5386	YDR192C	>0.9999	YNL225C	>0.9999
YCR063W	7.78	8.42	7.67	7.35	7.89	8	7.39	7.44	8.06	7.89	7.32	7.42	7.86	7.85	7.52	7.49													YOL052C	>0.9999	YER146W	0.999	YBR297W	>0.9999	YER074W-A	>0.9999
YCR065W	8.27	7.92	8.17	8.24	8.19	8.15	8.25	8.43	7.53	8.19	7.77	7.53	7.89	7.83	8.52	8.39													YBR291C	>0.9999	YNL144C	>0.9999	YLR164W	>0.9999	YHR091C	>0.9999
YCR066W	5.97	5.95	5.89	5.81	5.9	5.89	5.77	5.81	5.83	6.07	5.86	5.88	6.05	6.02	5.66	5.74													YBR172C	>0.9999	YMR292W	>0.9999	YMR073C	>0.9999	YDR354W	0.7973
YCR067C	8.38	8.85	8.29	8.37	8.45	8.36	8.35	8.31	8.27	8.34	7.96	7.9	8.4	8.29	8.3	8.27											u		YHR212W-A	>0.9999	YKL183W	>0.9999	YBR255C-A	>0.9999	YNL241C	>0.9999
YCR068W	4.82	4.22	4.93	4.97	4.54	4.83	4.91	4.87	4.16	4.31	4.46	4.38	4.01	4.03	4.72	4.88											u		YDL157C	>0.9999	YOR384W	0.6896	YBR293W	>0.9999	YMR079W	>0.9999
YCR069W	9.01	9.53	8.78	9.08	9.38	9.29	9.31	9.17	9.54	9.14	8.95	8.91	9.1	9.39	9.4	9.32											u		YDR003W-A	>0.9999	YBL095W	>0.9999	YJL013C	>0.9999	YHL015W-A	>0.9999
YCR071C	7.82	7.7	7.84	7.87	8.1	8.16	7.96	8.02	7.91	8.06	8.27	8.27	8.03	8.2	8.02	8.04											u		YDR370C	>0.9999	YKL133C	>0.9999	YOR332W	>0.9999	YHR209W	0.5014
YCR072C	9.11	9.34	9.43	8.64	7.8	8.26	7.95	8.06	7.99	9.12	8.87	8.93	8.49	8.2	7.81	7.89											u		YOR112W	>0.9999	YJL031C	0.9549	YDR179C	0.451	YLR043C	>0.9999
YCR073C	6.88	7.26	6.63	6.32	6.78	6.52	6.4	6.3	8.37	7.29	6.07	6.14	7.2	7.13	6.6	6.6											u		YPR065W	>0.9999	YKR008W	>0.9999	YKL095W	>0.9999	YER153C	>0.9999
YCR073W-A	8.39	8.87	8.82	8.77	8.73	8.85	8.99	8.98	9.08	8.59	8.94	9.08	8.38	8.84	9.05	9.13											u		YKR051W	>0.9999	YPL152W-A	>0.9999	YFL060C	>0.9999	YKL090W	>0.9999
YCR075C	6.31	7.15	6.46	7.04	6.72	6.96	7.42	7.32	6.55	6.42	7.34	7.37	6.92	6.93	7.48	7.55											u		YKL075C	>0.9999	YMR237W	>0.9999	YHR003C	>0.9999	YCR030C	>0.9999
YCR075W-A	7.77	7.79	7.61	7.8	8	8.04	7.68	8.03	7.77	8.1	8.12	8.05	8.06	7.98	8.03	8.13											u		YLL014W	>0.9999	YIL071C	>0.9999	YDR212W	>0.9999	YDR178W	0.0826
YCR076C	6.46	6.7	6.58	6.74	7	6.72	6.9	6.98	7.18	6.74	6.88	6.97	7.05	7.15	7.06	6.99											u		YPR120C	>0.9999	YDR313C	>0.9999	YOR373W	>0.9999	YGR240C-A	0.9917
YCR077C	9.41	9.05	9.27	9.15	9.3	9.3	8.96	9.01	9.14	9.27	9.02	8.94	9.33	9.33	8.88	8.9											u		YBL039W-A	>0.9999	YHR105W	>0.9999	YKR062W	>0.9999	YLL023C	>0.9999
YCR079W	6.7	6.67	6.7	6.68	7.18	7.07	7.02	6.94	7.2	6.77	6.66	6.76	6.97	7.22	7.09	7.05											u		YNL137C	>0.9999	YEL059C-A	0.0675	YML025C	>0.9999	YHR131C	>0.9999
YCR081W	6.48	6.38	6.46	6.34	6.18	5.86	6.16	6.24	6.29	6.18	5.76	5.51	6.3	6.22	6.2	6.2											u		YLR390W	>0.9999	YIL137C	>0.9999	YDR443C	>0.9999	YBR108W	>0.9999
YCR082W	9.05	9.32	8.88	8.83	8.96	9.09	8.89	8.8	9.28	9.31	9.09	9.07	9.48	9.18	8.79	8.82											u		YCR108C	>0.9999	YNL090W	0.3637	YPR176C	>0.9999	YGR105W	>0.9999
YCR083W	8.03	8.2	7.76	7.93	7.9	8.2	7.86	7.79	8.9	8.2	8.15	8.15	7.82	8.07	7.91	7.73											u		YNR037C	>0.9999	YJR057W	>0.9999	YOR337W	>0.9999	YOL060C	>0.9999
YCR084C	10.14	9.91	10.07	9.92	10.14	10.01	9.81	9.85	9.63	9.98	9.49	9.31	9.81	9.78	9.84	9.78											u		YBR212W	>0.9999	YML029W	0.9233	YBR030W	>0.9999	YER060W-A	>0.9999
YCR086W	7.44	7.36	7.23	7.27	7.26	7.45	7.24	7.15	7.35	7.56	7.33	7.39	7.31	7.34	7.3	7.23											u		YDR341C	>0.9999	YOR111W	0.333	YIL082W-A	>0.9999	YLR011W	>0.9999
YCR087C-A	8.93	8.65	8.86	8.4	8.43	8.82	8.05	8.07	8.57	9.04	8.52	8.64	9.14	9.04	7.93	7.93											u		YCL058C	>0.9999	YLR437C	>0.9999	YDR476C	>0.9999	YHR027C	>0.9999
YCR088W	10.2	10.15	9.63	9.66	10.2	10.03	9.77	9.87	10.14	9.97	9.3	9.12	9.95	9.92	9.86	9.85											u		YMR218C	>0.9999	YDR251W	>0.9999	YGR021W	>0.9999	YKL141W	>0.9999
YCR089W	6.98	7.03	7.07	6.74	7.41	6.99	6.79	6.7	6.82	7.12	6.19	6.16	6.8	6.86	6.89	6.84											u		YBR150C	>0.9999	YDR012W	>0.9999	YOR380W	>0.9999	YOR161C	0.9997
YCR090C	7.04	7.35	7.41	7.39	7.04	7.4	7.45	7.4	7.07	7.11	8.07	8.13	7	7.09	7.24	7.37											u		YMR284W	>0.9999	YDR068W	>0.9999	YDL175C	>0.9999	YMR175W-A	>0.9999
YCR091W	5.82	6.22	5.59	5.84	6.39	6.08	5.95	5.98	6.85	6.02	5.78	5.72	6.11	6.43	5.89	5.95											u		YNL255C	>0.9999	YHR020W	0.9997	YMR062C	>0.9999	YIL138C	>0.9999
YCR092C	6.93	6.79	6.76	6.91	6.84	6.66	6.66	6.73	6.4	6.87	6.78	6.68	7.04	6.83	6.67	6.57											u		YDR459C	>0.9999	YPL137C	0.9233	YDR173C	>0.9999	YKL213C	>0.9999
YCR093W	9.58	9.74	9.38	9.3	9.72	9.37	9.16	9.08	9.19	9.88	9.11	8.84	9.98	9.84	9.07	9.04											u		YDR469W	>0.9999	YER023W	>0.9999	YHR007C	>0.9999	YBR129C	>0.9999
YCR094W	7.84	8.17	8.15	8.16	7.76	8.08	7.99	8.06	8.11	7.79	8.38	8.38	8.01	8.12	8.12	8.03											u		YFL067W	>0.9999	YJL046W	>0.9999	YDR477W	>0.9999	YOR058C	>0.9999
YCR095C	7	6.96	6.93	6.85	6.99	7.03	6.88	6.78	7.28	7.13	7.07	7.15	7.33	7.17	6.9	6.9											u		YDR529C	>0.9999	YDL159W-A	>0.9999	YKL185W	>0.9999	YCR105W	>0.9999
YCR096C	8.42	8.25	7.87	8.03	8.73	8.57	8.08	8.11	8.79	8.33	7.93	8.13	8.59	8.65	8.18	8.19											u		YLR281C	>0.9999	YML009C	0.6523	YER057C	>0.9999	YGR097W	>0.9999
YCR097W	6.52	6.56	6.39	6.48	6.86	6.95	6.75	6.79	6.99	7.01	6.84	6.95	7.32	7.33	6.82	6.98													YAL013W	>0.9999	YDR539W	>0.9999	YAL027W	>0.9999	YJR060W	>0.9999
YCR098C	4.03	3.98	4.4	4.4	4.9	4.47	4.03	4.58	5.69	4.29	4.5	4.27	4.2	4.16	5.22	5.22													YFL041W	>0.9999	YFL029C	>0.9999	YJR017C	>0.9999	YMR299C	>0.9999
YCR099C	4.34	4.82	4.47	4.72	5.14	4.81	5.19	5.02	5.05	4.58	4.62	4.65	5.26	5.03	5.02	5.14													YDR479C	>0.9999	YER086W	0.8541	YJR024C	>0.9999	YLR099C	0.3451
YCR100C	4.67	4.91	4.72	5.01	5.05	4.98	5.31	5.04	5.14	4.48	4.57	4.66	4.88	5.06	5.16	5.24													YOR067C	>0.9999	YDR508C	0.999	YBR118W	>0.9999	YDR446W	>0.9999
YCR101C	2.56	2.09	3.21	3.55	3.72	3.97	3.77	3.38	4.23	1.92	2.03	2.17	2.1	1.96	3.55	3.65													YCR065W	>0.9999	YCL018W	0.9032	YMR203W	>0.9999	YKL089W	>0.9999
YCR102C	4.73	5.26	4.59	4.48	4.68	4.52	4.39	4.68	5.25	5.14	4.3	4.31	5.01	5.03	4.54	4.52													YER092W	>0.9999	YER036C	0.9032	YPR049C	0.9981	YOL091W	>0.9999
YCR104W	5.42	5.61	5.35	5.35	6.42	5.52	5.65	5.71	6.66	5.37	4.8	4.88	5.66	5.68	5.83	5.86													YGL060W	>0.9999	YJL111W	>0.9999	YFR041C	>0.9999	YBR017C	>0.9999
YCR105W	3.86	3.72	3.94	4.16	3.81	3.94	4.06	4.13	4.43	4	4.18	4.22	3.9	3.89	4.22	4.04													YKR071C	>0.9999	YMR167W	>0.9999	YGR035W-A	>0.9999	YGR045C	>0.9999
YCR106W	6.4	7.15	5.95	5.94	6.5	6.43	5.86	5.75	6.74	6.51	5.73	6.09	6.94	6.99	5.74	5.79													YJL127C	>0.9999	YJR135W-A	>0.9999	YGL178W	>0.9999	YKR015C	>0.9999
YCR107W	6.84	6.99	6.58	6.62	6.62	6.62	6.67	6.39	6.96	6.81	6.23	6.06	6.7	6.58	6.6	6.42													YHR019C	>0.9999	YOL107W	>0.9999	YNL225C	>0.9999	YLR102C	>0.9999
YCR107W	4.78	4.94	4.19	4.49	4.29	4.92	4.49	4.59	4.91	4.69	4.15	4.3	4.76	4.45	4.17	4.16													YCR089W	>0.9999	YNL238W	0.726	YER074W-A	>0.9999	YNL135C	>0.9999
YCR107W	4.15	4.39	3.68	3.96	3.85	3.87	3.51	3.86	4.42	4.2	3.79	3.79	4.47	4.12	3.6	3.64													YMR084W	>0.9999	YHR001W-A	0.1076	YHR091C	0.992	YDR262W	>0.9999
YCR108C	4.08	3.83	3.97	3.54	4.93	4.38	3.61	3.86	3.65	3.94	3.2	2.82	4.02	3.9	3.78	3.83													YNL031C	>0.9999	YBL059W	>0.9999	YDR354W	>0.9999	YPL033C	0.718
YDL001W	7.53	7.34	7.37	7.36	7.44	7.35	7.48	7.49	7.46	7.56	7.69	7.62	7.74	7.61	7.4	7.42													YER074W	>0.9999	YHR007C-A	0.9885	YNL241C	>0.9999	YPL209C	>0.9999
YDL002C	7.43	7.46	7.32	7.41	7.31	7.37	7.41	7.29	7.37	7.58	8	7.89	7.46	7.54	7.21	7.37													YMR298W	>0.9999	YOL012C	>0.9999	YJL088W	>0.9999	YDL002C	>0.9999
YDL003W	9.61	9.46	8.73	9.09	9.71	9.57	8.87	8.85	9.08	9.63	9.02	8.89	9.55	9.32	8.81	8.72													YMR164C	>0.9999	YDR091C	0.1501	YMR079W	>0.9999	YMR015C	>0.9999
YDL004W	10.68	10.88	10.39	10.85	10.55	10.59	10.49	10.59	10.9	10.84	10.92	10.77	9.87	10.41	10.68	10.51													YDR035W	>0.9999	YMR243C	>0.9999	YHL015W-A	0.9662	YBL017C	>0.9999
YDL005C	7.59	7.31	7.46	7.44	7.45	7.34	7.28	7.37	7.34	7.46	7.38	7.41	7.48	7.57	7.37	7.46													YPR149W	>0.9999	YML003W	0.6144	YHR209W	>0.9999	YPR016C	>0.9999
YDL006W	7.06	7.16	7.36	7.33	7.19	7.1	7.41	7.42	7.38	7.16	7.44	7.54	7.29	7.38	7.39	7.3													YEL016C	>0.9999	YDR336W	>0.9999	YLR043C	>0.9999	YMR066W	>0.9999
YDL007W	9.7	9.78	9.14	9.3	9.79	9.64	9.16	9.23	9.78	9.77	9.51	9.53	9.81	9.75	9.25	9.37													YDR213W	>0.9999	YLR013W	>0.9999	YKL090W	>0.9999	YGR110W	0.1769
YDL008W	7.8	8.04	7.54	7.68	7.69	8.02	7.87	7.78	8.06	7.88	8.05	8.16	7.66	7.79	7.86	7.88													YBR111C	>0.9999	YGL144C	>0.9999	YCR030C	>0.9999	YMR003W	>0.9999
YDL010W	7.45	7.21	7.79	8.23	8.33	8.18	8.44	8.43	8.42	7.28	7.92	8.12	7.52	7.83	8.59	8.61													YDR286C	>0.9999	YDR233C	>0.9999	YGR240C-A	>0.9999	YDR109C	>0.9999
YDL012C	9.52	9.63	9.02	9.12	9.53	9.46	9.15	9.04	9.01	9.75	9.25	9.22	9.8	9.73	9.16	9.14													YJR094C	>0.9999	YCR060W	>0.9999	YLL023C	0.9997	YFL037W	>0.9999
YDL013W	7.86	8.06	7.64	7.66	7.77	7.67	7.62	7.47	7.99	8.04	7.78	7.83	8	8.03	7.65	7.47													YEL018W	>0.9999	YER004W	>0.9999	YHR131C	>0.9999	YMR206W	>0.9999
YDL014W	11.29	11.45	11.25	11.18	10.74	10.93	10.63	10.66	10.53	11.43	11.2	11.27	10.88	11.1	10.56	10.49													YLR375W	>0.9999	YER018C	>0.9999	YBR108W	0.2497	YAL020C	>0.9999
YDL015C	9.94	10.35	10.38	10.46	10.17	10.31	10.5	10.38	10.06	9.79	10.39	10.29	10.31	10.37	10.41	10.32													YGR128C	>0.9999	YDR129C	>0.9999	YGR105W	>0.9999	YDR448W	>0.9999
YDL017W	6.2	6.34	6.45	6.34	5.99	5.87	6.24	6.36	5.8	6.39	6.59	6.66	6.36	6.25	6.3	6.4													YGL194C	>0.9999	YDR192C	>0.9999	YOL060C	>0.9999	YJR091C	>0.9999
YDL018C	7.16	7.37	7.16	7.6	7.28	7.55	7.75	7.63	7.38	7.23	7.84	7.69	7.01	7.24	7.59	7.74													YBR203W	>0.9999	YBR297W	>0.9999	YLR011W	>0.9999	YDL020C	>0.9999
YDL019C	8.67	9.13	8.54	8.89	9.29	8.97	8.75	8.63	9.02	8.92	8.46	8.32	8.89	9.12	8.74	8.58													YER061C	>0.9999	YLR164W	>0.9999	YHR027C	>0.9999	YJL107C	>0.9999
YDL020C	7.77	7.78	8.02	8.33	8.15	7.83	8.58	8.5	8.6	7.6	8.7	8.77	8.21	8.65	8.4	8.59													YDR266C	>0.9999	YMR073C	0.9997	YKL141W	>0.9999	YDL137W	>0.9999
YDL021W	8.07	8.46	7.11	7.63	8.66	8.61	8.14	8.29	9.02	7.89	7.97	7.75	8.03	8.24	8.56	8.64													YGL247W	>0.9999	YBR255C-A	>0.9999	YOR161C	>0.9999	YGL224C	>0.9999
YDL022W	9.54	10.45	10.16	10.64	10.6	10.59	11.06	10.86	9.86	9.37	10.73	10.74	9.58	10.25	10.81	10.97													YDR357C	>0.9999	YBR293W	>0.9999	YMR175W-A	>0.9999	YIR028W	>0.9999
YDL024C	4.64	4.85	4.79	4.46	5.27	4.54	4.83	4.73	5.11	4.72	4.59	4.55	4.58	4.63	4.91	4.73													YLR007W	>0.9999	YJL013C	>0.9999	YIL138C	>0.9999	YNR075C-A	>0.9999
YDL025C	8.01	8.14	8.08	8.3	8.87	8.47	8.58	8.42	8.54	7.98	8.07	8.12	8.89	9.19	8.25	8.24													YML054C-A	>0.9999	YOR332W	>0.9999	YKL213C	>0.9999	YMR158W	>0.9999
YDL027C	7.82	7.57	7.43	7.87	8.25	7.99	8.18	8.02	7.98	7.62	7.87	7.63	7.75	7.97	8.16	8.14													YBL076C	>0.9999	YDR179C	0.726	YBR129C	>0.9999	YLR141W	>0.9999
YDL028C	7.38	7.36	7.25	7.31	7.35	7.25	7.18	7.37	6.85	7.36	7.12	7.21	7.82	7.52	7.21	7.27													YKR028W	>0.9999	YKL095W	0.9759	YOR058C	>0.9999	YER163C	>0.9999
YDL029W	10.05	10.04	9.8	9.93	10.04	10.12	9.98	9.97	10.07	9.99	10.14	10.19	10.09	10.19	9.97	9.97													YGL106W	>0.9999	YFL060C	0.9997	YCR105W	>0.9999	YDL122W	>0.9999
YDL030W	6.37	6.3	6.41	6.28	5.94	5.94	5.97	5.99	6.11	6.45	6.48	6.45	6.37	6.21	6.08	6.07													YPR181C	>0.9999	YHR003C	>0.9999	YGR097W	>0.9999	YDL029W	>0.9999
YDL031W	10.42	10.2	9.81	9.4	9.71	9.73	8.81	8.76	9.74	10.63	9.28	9.25	9.95	9.82	8.66	8.64													YOL112W	>0.9999	YDR212W	>0.9999	YJR060W	0.9989	YOR322C	>0.9999
YDL033C	6.75	6.65	6.6	6.39	6.59	6.19	6.09	6.18	6.26	6.82	6.17	6.27	6.71	6.55	6.37	6.25													YHR191C	>0.9999	YOR373W	0.1857	YMR299C	0.2737	YKL196C	>0.9999
YDL035C	8.66	8.66	8.39	8.38	8.84	8.62	8.43	8.35	9.03	8.48	8.14	8.09	9.01	8.81	8.49	8.45													YJL062W	>0.9999	YKR062W	>0.9999	YLR099C	>0.9999	YNL231C	>0.9999
YDL036C	6.82	6.91	6.85	6.55	6.24	6.42	6.52	6.55	6.22	6.75	6.81	6.87	6.58	6.55	6.58	6.55													YGL201C	>0.9999	YML025C	>0.9999	YKL089W	>0.9999	YEL012W	>0.9999
YDL037C	3.67	3.06	3.34	2.71	2.74	1.84	2.22	2.07	1.55	2.12	2.09	2.38	2.31	1.85	2.51	2.28													YKL173W	>0.9999	YFL051C	0.2278	YOL091W	>0.9999	YHR204W	>0.9999
YDL038C	6.85	4.28	6.01	3.9	4.2	4.05	3.97	3.92	3.95	5.9	4.14	4.58	4.41	4.02	4.07	3.97													YBR168W	>0.9999	YPR176C	>0.9999	YBR017C	>0.9999	YLR408C	>0.9999
YDL039C	8.19	6	7.39	5.23	5.59	5.39	5.44	5.34	5.99	7.68	5.54	5.95	6.37	5.75	5.67	5.47													YPL038W-A	>0.9999	YBR030W	>0.9999	YGR045C	>0.9999	YGL061C	>0.9999
YDL040C	9.5	9.51	9.4	9.47	9.29	9.33	9.45	9.34	9.14	9.42	9.16	9	8.99	8.95	9.29	9.37													YJL187C	>0.9999	YIL082W-A	0.096	YKR015C	>0.9999	YDL191W	>0.9999
YDL042C	8.18	8.3	8.32	8.11	8.06	8.08	7.88	7.93	8.2	8.15	7.98	8.03	8.17	7.96	7.9	7.78													YNL126W	>0.9999	YDR476C	>0.9999	YLR102C	>0.9999	YLR329W	>0.9999
YDL043C	7.76	7.37	7.65	7.58	7.54	7.66	7.41	7.38	6.89	7.58	7.82	7.77	7.08	7.23	7.29	7.36													YMR095C	>0.9999	YGR021W	>0.9999	YER175C	>0.9999	YLR233C	>0.9999
YDL044C	6.75	6.66	6.92	6.93	6.85	6.58	6.87	6.74	6.79	6.7	6.82	6.73	6.58	6.62	6.71	6.69													YDR371W	>0.9999	YOR380W	>0.9999	YNL135C	>0.9999	YGR275W	>0.9999
YDL045C	6.86	7.19	6.99	7.18	6.74	6.89	7.21	7.19	7.31	6.88	7.33	7.23	6.89	6.97	7.25	7.33													YDR510W	>0.9999	YDL175C	>0.9999	YHR018C	>0.9999	YJR088C	>0.9999
YDL045W-A	8.58	8.49	8.46	8.54	8.88	8.92	8.67	8.64	8.55	8.79	8.82	8.72	8.95	8.9	8.67	8.72													YJL173C	>0.9999	YDR173C	0.9831	YDR262W	>0.9999	YIR035C	>0.9999
YDL046W	10.61	10.78	10.39	10.57	10.57	10.6	10.38	10.45	10.87	10.64	10.44	10.36	10.37	10.53	10.41	10.36													YBL059C-A	>0.9999	YHR007C	>0.9999	YPL033C	0.992	YOR147W	>0.9999
YDL047W	9.43	9.58	9.47	9.23	9.23	9.15	8.95	9	9	9.46	9.21	9.39	9.29	9.38	9.02	9.05													YLR285C-A	>0.9999	YDR477W	>0.9999	YPL209C	>0.9999	YDL130W	>0.9999
YDL048C	7.71	7.86	8.33	7.44	6.59	6.66	7.4	7.39	7.35	7.52	7.52	7.62	6.96	7.3	7.42	7.43													YER164W	>0.9999	YKL185W	0.1205	YDL002C	>0.9999	YIL016W	>0.9999
YDL049C	8.33	7.65	7.92	7.88	7.07	7.28	7.18	7.32	8.38	7.93	7.87	8.1	7.34	7.37	7.22	7.14													YGR224W	>0.9999	YER057C	>0.9999	YMR015C	>0.9999	YLL027W	>0.9999
YDL051W	9.63	9.37	9.45	9.35	8.82	9.26	8.94	8.84	9.12	9.47	9.69	9.77	9.01	9.02	8.65	8.72													YIL140W	>0.9999	YAL027W	>0.9999	YBL017C	>0.9999	YDR515W	>0.9999
YDL052C	9.44	9.54	9.67	9.69	9.86	9.56	9.62	9.64	9.82	9.34	9.53	9.59	9.64	9.62	9.71	9.8													YLR080W	>0.9999	YJR017C	0.333	YPR016C	>0.9999	YJL096W	>0.9999
YDL053C	9.55	9.71	9.39	9.44	9.69	9.65	9.39	9.31	9.56	9.76	9.62	9.56	9.89	9.93	9.37	9.29													YPL204W	>0.9999	YJR024C	>0.9999	YMR066W	>0.9999	YKR001C	>0.9999
YDL054C	7.66	7.8	8.36	8.19	7.96	7.85	8.54	8.21	7.73	7.85	7.87	7.97	8.31	8.45	8.21	8.06													YCL008C	>0.9999	YBR118W	>0.9999	YGR110W	>0.9999	YDR385W	>0.9999
YDL055C	12.31	12.08	11.97	12.13	12.4	12.35	12.13	12.16	12.26	12.17	11.95	11.89	12.16	12.19	12.21	12.13													YPL233W	>0.9999	YMR203W	>0.9999	YMR003W	0.9547	YOL052C	>0.9999
YDL056W	8.07	8.1	7.67	7.7	7.91	7.6	7.63	7.52	7.5	8.07	7.88	7.78	8.32	8.1	7.36	7.49													YNL077W	>0.9999	YOL007C	0.333	YDR109C	>0.9999	YBR291C	>0.9999
YDL057W	5.54	6.13	5.86	5.81	5.54	5.7	5.92	5.85	6.12	5.84	6.08	6.1	5.51	5.7	6.09	6													YJL133C-A	>0.9999	YFR041C	0.9405	YFL037W	>0.9999	YBR172C	>0.9999
YDL058W	8.87	8.62	8.51	8.44	9.01	8.66	8.38	8.5	8.72	8.94	8.2	8.19	9.25	8.81	8.34	8.37													YBR033W	>0.9999	YGR035W-A	0.9759	YAL020C	>0.9999	YHR212W-A	>0.9999
YDL059C	9.14	9.12	7.56	8.83	9.51	9.33	8.8	8.8	9.69	8.48	8.42	8.69	9.41	9.19	8.87	8.59													YOR234C	>0.9999	YGL178W	0.9666	YDR448W	0.9662	YDL157C	>0.9999
YDL060W	9.59	9.49	9.58	8.95	8.61	8.7	8.38	8.37	8.55	9.59	8.75	8.82	8.89	8.74	8.25	8.21													YKL212W	>0.9999	YNL225C	>0.9999	YJR091C	>0.9999	YDR003W-A	>0.9999
YDL061C	12.31	12.3	12.22	12.23	12.32	12.26	12.24	12.26	12.24	12.42	12.28	12.28	12.34	12.29	12.29	12.28													YOR087W	>0.9999	YER074W-A	>0.9999	YDL020C	>0.9999	YDR370C	>0.9999
YDL061C	12.28	12.27	12.24	12.22	12.25	12.19	12.22	12.26	12.12	12.33	12.22	12.19	12.24	12.09	12.28	12.24													YOL090W	>0.9999	YHR091C	0.8254	YJL107C	>0.9999	YOR112W	>0.9999
YDL063C	9.09	8.79	9.49	8.66	7.27	7.89	7.91	7.96	7.96	8.93	8.74	8.65	8.18	7.62	7.63	7.67													YMR074C	>0.9999	YDR354W	0.7943	YDL137W	>0.9999	YPR065W	>0.9999
YDL064W	8.59	8.74	8.79	8.85	8.56	8.71	8.81	8.95	8.17	8.71	9.11	8.98	8.67	8.66	8.85	8.84													YGR082W	>0.9999	YNL241C	>0.9999	YGL224C	>0.9999	YKR051W	>0.9999
YDL065C	8.91	8.77	8.36	8.56	9.06	9.02	8.24	8.24	8.99	8.77	8.55	8.69	8.71	8.95	8.26	8.25													YDR505C	>0.9999	YMR079W	>0.9999	YIR028W	>0.9999	YKL075C	>0.9999
YDL066W	11.7	12.08	11.69	11.78	11.64	11.8	11.91	11.81	12.06	11.46	11.5	11.57	11.72	11.76	11.92	11.68													YNL239W	>0.9999	YHL015W-A	>0.9999	YMR158W	>0.9999	YLL014W	>0.9999
YDL067C	9.76	9.94	9.73	10.06	9.86	9.86	9.94	9.93	10.28	10.11	10.37	10.15	10.18	10.2	10.06	9.9													YNL117W	>0.9999	YHR209W	>0.9999	YKL120W	>0.9999	YPR120C	>0.9999
YDL069C	5.83	5.96	6.04	6.16	5.67	5.69	6.41	6.25	5.78	6	6.47	6.31	6.16	6.06	6.34	6.32													YPR109W	>0.9999	YLR043C	0.999	YDL210W	>0.9999	YBL039W-A	>0.9999
YDL070W	9.46	9.4	9.59	9.63	9.81	9.22	9.76	9.77	9.57	9.38	9.68	9.7	10.07	9.93	9.8	9.74													YGL235W	>0.9999	YER153C	0.9759	YER163C	>0.9999	YNL137C	>0.9999
YDL072C	11.59	8.67	8.57	8.89	9.01	9.18	9.38	9.51	9.48	8.16	8.79	8.69	7.99	8.4	9.26	9.34													YBR201W	>0.9999	YKL090W	>0.9999	YDL122W	>0.9999	YLR390W	>0.9999
YDL073W	7.93	8.13	7.64	7.52	7.98	7.76	7.54	7.61	7.75	8.05	7.51	7.62	8.37	8.18	7.46	7.47													YKL084W	>0.9999	YCR030C	>0.9999	YDL029W	>0.9999	YCR108C	>0.9999
YDL074C	9.38	8.93	9.24	9.14	9.25	9.11	8.99	9.08	8.8	9.29	9.17	9	9.43	9.22	8.95	9.01													YAL034W-A	>0.9999	YDR178W	0.1501	YOR322C	>0.9999	YNR037C	>0.9999
YDL075W	12.31	12.39	12.21	12.38	12.45	12.42	12.35	12.32	12.3	12.46	12.38	12.3	12.32	12.42	12.41	12.28													YJR135C	>0.9999	YGR240C-A	0.7943	YKL196C	>0.9999	YBR212W	>0.9999
YDL076C	7.11	7.16	7.04	7.18	7.01	7.07	7.22	7.32	7	7	7.29	7.32	7.11	7.14	7.14	7.23													YPL032C	>0.9999	YLL023C	>0.9999	YNL231C	0.9997	YDR341C	>0.9999
YDL077C	6.4	6.57	6.55	6.54	6.27	6.34	6.6	6.66	6.25	6.6	6.57	6.46	6.64	6.6	6.62	6.6													YDR158W	>0.9999	YHR131C	0.5764	YEL012W	>0.9999	YCL058C	>0.9999
YDL078C	9.24	9.46	9.26	9.39	9.23	9.26	9.57	9.51	9.36	9.32	9.64	9.44	9.25	9.23	9.54	9.52													YPL168W	>0.9999	YBR108W	0.9997	YHR204W	>0.9999	YMR218C	>0.9999
YDL079C	3.81	4.39	4.12	4.1	4.33	3.74	4.18	4.28	3.92	3.95	3.76	4	4.16	4.29	4.01	4.16													YGR181W	>0.9999	YGR105W	0.999	YLR408C	>0.9999	YBR150C	>0.9999
YDL080C	7.69	7.45	7.66	7.79	8.69	8.62	8.35	8.21	8.71	7.94	7.73	7.7	8.23	8.43	8.25	8.47													YPR052C	>0.9999	YOL060C	0.8254	YGL061C	>0.9999	YMR284W	>0.9999
YDL081C	11.71	12.16	11.9	12.02	11.84	11.96	12.01	11.97	11.98	11.8	12.13	12.17	11.77	11.97	12.04	11.97													YLR005W	>0.9999	YLR011W	0.7611	YDL191W	>0.9999	YNL255C	>0.9999
YDL082W	11.39	11.03	11.82	11.64	11.26	11.25	11.55	11.73	10.74	10.93	11.53	11.45	10.67	10.91	11.63	11.61													YMR287C	>0.9999	YHR027C	>0.9999	YLR329W	>0.9999	YDR459C	>0.9999
YDL083C	12.19	12.04	12.37	12.32	12.06	12.14	12.37	12.44	11.97	12.27	12.4	12.34	12.18	12.1	12.38	12.33													YMR094W	>0.9999	YKL141W	>0.9999	YGR275W	>0.9999	YDR469W	>0.9999
YDL084W	11.99	12.05	11.89	11.92	11.92	11.93	11.88	11.96	11.91	12.02	12.06	12.08	12.04	12.06	11.98	12.02													YLR264C-A	>0.9999	YOR161C	>0.9999	YJR088C	>0.9999	YFL067W	>0.9999
YDL085C-A	8.15	8.43	7.75	7.94	8.74	8.87	8.36	8.3	8.78	8.51	8.45	8.37	9.45	9.43	8.52	8.55													YOL092W	>0.9999	YMR175W-A	>0.9999	YIR035C	>0.9999	YDR529C	>0.9999
YDL085W	4.82	5.51	4.49	4.87	5.58	5.5	5.38	5.2	6.39	4.93	4.27	4.34	5.15	5.21	5.46	5.18													YDR043C	>0.9999	YKL213C	>0.9999	YOR147W	>0.9999	YLR281C	>0.9999
YDL086W	9.62	9.76	9.66	9.58	10.36	10.35	10.01	10.01	10.24	9.43	9.57	9.59	10.13	10.12	10.12	9.97													YBR138C	>0.9999	YOR058C	>0.9999	YDL130W	>0.9999	YAL013W	>0.9999
YDL087C	5.24	5.37	5.18	5.23	5.21	5.55	5	5.14	5.15	5.09	5	5.3	5.45	5.36	5.09	5.09													YBR234C	>0.9999	YCR105W	>0.9999	YIL016W	>0.9999	YFL041W	>0.9999
YDL088C	8.47	8.41	8.49	8.3	8.59	8.32	8.34	8.39	7.88	8.58	8.25	8.18	8.69	8.45	8.29	8.24													YIL106W	>0.9999	YJR060W	>0.9999	YLL027W	>0.9999	YDR479C	>0.9999
YDL089W	6.98	7.36	7.17	7.33	7.44	7.34	7.21	7.32	7.34	7.12	7.23	7.2	7.3	7.46	7.37	7.38													YOL069W	>0.9999	YMR299C	0.0675	YDR515W	>0.9999	YOR067C	>0.9999
YDL090C	6.75	6.91	6.7	6.95	6.77	7	7.01	6.96	7.09	6.74	6.68	6.8	6.59	6.63	6.99	6.85													YLR078C	>0.9999	YLR099C	>0.9999	YJL096W	>0.9999	YCR065W	>0.9999
YDL091C	6.85	6.73	6.33	6.79	7.37	7.17	6.96	6.92	7.18	6.89	6.72	6.66	7.25	7.3	7.03	7													YDR170C	>0.9999	YDR446W	>0.9999	YKR001C	>0.9999	YER092W	>0.9999
YDL092W	9.2	9.02	9.12	9.16	9.34	9.42	9.24	9.14	9.02	9.36	9.5	9.46	9.43	9.48	9.18	9.09													YMR148W	>0.9999	YKL089W	>0.9999	YDR385W	>0.9999	YGL060W	>0.9999
YDL093W	6.95	6.81	7.12	7.1	6.94	7.01	7.2	7.34	6.79	6.78	6.8	6.7	6.53	6.6	7.35	7.33													YMR313C	>0.9999	YBR017C	>0.9999	YOL052C	>0.9999	YKR071C	>0.9999
YDL095W	9.79	10.31	10.15	10.17	10.04	9.91	9.99	10.06	9.63	9.99	9.95	9.83	10.14	10.08	10.08	10.1													YNR039C	>0.9999	YKR015C	0.7943	YBR291C	>0.9999	YJL127C	>0.9999
YDL097C	9.65	9.75	9.52	9.66	9.66	9.76	9.65	9.59	9.85	9.67	9.71	9.51	9.67	9.61	9.65	9.45													YOR324C	>0.9999	YLR102C	0.9995	YBR172C	>0.9999	YHR019C	>0.9999
YDL098C	6.39	6.17	6.59	6.67	6.08	6.16	6.71	6.68	6.11	6.6	7.02	7.05	6.29	6.29	6.8	6.83													YER098W	>0.9999	YNL135C	>0.9999	YHR212W-A	>0.9999	YCR089W	>0.9999
YDL099W	9.08	8.62	8.52	8.56	9.05	8.95	8.43	8.45	8.85	9.15	8.62	8.62	8.9	8.85	8.48	8.48													YJL128C	>0.9999	YDR262W	>0.9999	YDL157C	>0.9999	YMR084W	>0.9999
YDL100C	9.92	9.85	9.95	9.93	9.79	9.93	9.71	9.87	9.89	9.97	10.19	10.13	9.89	9.81	9.74	9.88													YHR175W	>0.9999	YPL033C	>0.9999	YDR003W-A	>0.9999	YNL031C	>0.9999
YDL101C	7.6	7.05	7.47	7.67	7.44	7.72	7.78	7.82	7.47	7.37	7.55	7.65	7.1	7.09	7.8	7.84													YHR208W	>0.9999	YPL209C	>0.9999	YDR370C	>0.9999	YER074W	>0.9999
YDL102W	8.15	8.19	7.94	7.78	8.04	7.96	7.63	7.69	7.77	8.19	7.71	7.64	8.13	7.99	7.59	7.56													YFL007W	>0.9999	YDL002C	0.1076	YOR112W	>0.9999	YMR298W	>0.9999
YDL103C	8.3	8.06	8.2	8.37	8.03	8.34	8.29	8.41	7.94	8.36	8.61	8.26	8.15	8.22	8.31	8.33													YDL006W	>0.9999	YMR015C	>0.9999	YPR065W	>0.9999	YMR164C	>0.9999
YDL104C	6.51	6.77	6.29	6.26	6.5	6.58	6.12	6.22	6.63	6.35	6.08	6.23	6.61	6.53	6.28	6.29													YBR290W	>0.9999	YBL017C	0.2278	YKR051W	0.9994	YPR149W	>0.9999
YDL105W	6.75	6.17	6.32	6.06	6.25	6.58	6.04	6.13	6.19	6.7	6.2	6.21	6.32	6.21	6.16	6.22													YEL003W	>0.9999	YPR016C	>0.9999	YKL075C	>0.9999	YEL016C	>0.9999
YDL106C	8.21	6.74	7.53	7.74	8.92	8.09	7.49	7.92	7.89	6.86	6.57	6.65	6.89	6.77	7.66	7.79													YLR283W	>0.9999	YMR066W	>0.9999	YLL014W	>0.9999	YDR213W	>0.9999
YDL107W	6.3	6.54	5.71	6.13	6.36	6.34	6	5.98	6.24	6.48	6.44	6.47	6.37	6.52	5.94	6.03													YGR206W	>0.9999	YGR110W	0.0599	YPR120C	0.1005	YBR111C	>0.9999
YDL108W	7.63	7.92	7.57	7.57	7.5	7.68	7.62	7.44	7.7	7.61	7.65	7.73	7.54	7.57	7.42	7.5													YDR517W	>0.9999	YMR003W	>0.9999	YBL039W-A	>0.9999	YDR286C	>0.9999
YDL109C	4.94	4.86	4.95	4.74	4.84	4.56	4.73	5.02	4.44	4.65	4.4	4.42	4.61	4.56	4.92	4.96													YJR102C	>0.9999	YDR109C	0.726	YNL137C	>0.9999	YJR094C	>0.9999
YDL110C	7.18	7.82	6.94	7.66	8.4	7.9	8.21	8.05	8.02	7.54	7.73	7.49	7.67	8.29	8.14	8.13													YGR014W	>0.9999	YFL037W	>0.9999	YLR390W	>0.9999	YEL018W	>0.9999
YDL111C	8.19	8.39	8.44	8.2	7.62	8.05	8.07	7.94	7.93	8.38	8.52	8.53	7.94	7.81	7.89	7.85													YBR145W	>0.9999	YMR206W	>0.9999	YCR108C	0.1005	YLR375W	>0.9999
YDL112W	8.97	8.81	8.95	8.56	8.3	8.28	8.24	8.34	7.99	9.05	8.46	8.37	8.91	8.63	8.1	8.22													YPL098C	>0.9999	YAL020C	>0.9999	YNR037C	>0.9999	YGR128C	>0.9999
YDL113C	6.78	7.02	6.52	6.95	7.15	7.03	7.14	7.22	7.35	6.6	7.17	7.14	7.22	7.23	7.2	7.16													YOR108W	>0.9999	YDR448W	>0.9999	YDR341C	>0.9999	YGL194C	>0.9999
YDL114W	2.92	3.26	2.94	2.81	3.45	3.32	3.17	3.04	3.19	3.13	2.97	3.17	2.82	3.23	3.56	3.14													YOR355W	>0.9999	YJR091C	0.1671	YCL058C	>0.9999	YBR203W	0.9951
YDL115C	7.22	7.27	6.68	7.03	7.44	7.4	7.09	6.99	7.45	7.31	6.97	7.12	7.39	7.43	7.1	6.98													YNL327W	>0.9999	YDL020C	0.1671	YMR218C	>0.9999	YER061C	>0.9999
YDL116W	8.72	8.85	8.83	8.78	8.61	8.6	8.79	8.84	8.54	8.67	8.9	8.81	8.93	8.65	8.75	8.76													YDL200C	>0.9999	YJL107C	0.076	YBR150C	0.5566	YDR266C	>0.9999
YDL117W	8.32	8.13	8.19	8.09	8.24	8.07	7.99	8.04	7.88	8.22	7.69	7.7	8.6	8.32	7.89	7.96													YLR021W	>0.9999	YDL137W	>0.9999	YMR284W	>0.9999	YGL247W	>0.9999
YDL119C	6.12	6.28	5.92	6.17	6.54	6.35	6.53	6.24	6.4	6.2	6.21	6.14	5.9	6.19	6.38	6.22													YLR029C	>0.9999	YGL224C	0.9995	YNL255C	>0.9999	YDR357C	>0.9999
YDL120W	7.63	7.77	7.48	7.72	7.55	7.83	7.77	7.78	7.65	7.71	8.06	8.13	7.54	7.64	7.67	7.68													YOR267C	>0.9999	YIR028W	>0.9999	YDR459C	>0.9999	YLR007W	>0.9999
YDL121C	7.89	7.66	8.3	8.19	7.85	8.33	8.12	8.1	8.41	7.74	8.41	8.49	7.46	7.69	8.27	8.28													YDR200C	>0.9999	YNR075C-A	>0.9999	YDR469W	>0.9999	YML054C-A	>0.9999
YDL122W	9.2	9.06	9.17	8.85	8.86	8.67	8.57	8.56	8.66	9.14	8.61	8.48	8.74	8.67	8.44	8.46													YKL135C	>0.9999	YMR158W	0.9999	YDR529C	>0.9999	YBL076C	>0.9999
YDL123W	6.81	7.38	6.7	6.82	6.8	6.78	6.95	6.88	6.77	7.03	6.78	6.97	6.76	6.99	7.03	6.87													YFL056C	>0.9999	YLR141W	>0.9999	YLR281C	>0.9999	YKR028W	>0.9999
YDL124W	10.54	10.73	10.2	10.81	10.96	10.51	10.85	10.87	10.97	10.13	10.72	10.62	9.97	10.39	10.93	10.84													YJL205C	>0.9999	YKL120W	0.9983	YAL013W	>0.9999	YGL106W	>0.9999
YDL125C	9.92	9.94	10.31	10.34	10.38	10.27	10.44	10.48	10.47	9.95	10.46	10.49	10.25	10.43	10.51	10.54													YKL054C	>0.9999	YDL210W	>0.9999	YFL041W	0.593	YPR181C	>0.9999
YDL126C	11.85	12.01	11.43	11.58	11.71	11.53	11.47	11.51	11.72	11.94	11.47	11.32	11.7	11.65	11.54	11.53													YMR308C	>0.9999	YER163C	0.7611	YDR479C	0.9968	YOL112W	>0.9999
YDL127W	6.77	6.22	6.37	6.25	6.55	6.45	6.24	6.23	5.84	6.69	6.13	6.19	6.5	6.31	6.32	6.11													YBR153W	>0.9999	YDL122W	0.7611	YOR067C	>0.9999	YHR191C	>0.9999
YDL128W	8.79	9.12	9.65	9.51	8.96	9.05	9.46	9.32	9.15	8.79	9.28	9.16	8.83	8.94	9.31	9.28													YLR393W	>0.9999	YDL029W	>0.9999	YCR065W	>0.9999	YJL062W	>0.9999
YDL129W	5.41	5.35	5.76	4.69	4.41	4.68	4.42	4.4	4.83	5.47	5.11	5.11	4.7	4.82	4.17	4.13													YGL028C	>0.9999	YOR322C	0.9831	YER092W	>0.9999	YGL201C	>0.9999
YDL130W	12.07	12.28	12.21	12.2	12.2	12.25	12.22	12.28	12.21	12.26	12.28	12.31	12.22	12.29	12.28	12.24													YLR030W	>0.9999	YKL196C	>0.9999	YGL060W	>0.9999	YKL173W	>0.9999
YDL130W-A	9.44	9.48	8.87	9.38	10.16	10.08	9.74	9.63	10.5	9.47	9.17	8.94	9.11	9.66	9.78	9.7													YML097C	>0.9999	YNL231C	>0.9999	YKR071C	>0.9999	YBR168W	>0.9999
YDL131W	10.84	10.91	10.81	10.97	10.83	10.88	11.13	10.87	10.92	10.92	10.71	10.55	11.02	10.91	10.79	10.56													YER025W	>0.9999	YEL012W	0.0675	YJL127C	>0.9999	YPL038W-A	>0.9999
YDL132W	8.32	8.08	8.11	8.27	8.53	8.36	8.26	8.31	8.28	8.04	7.86	7.71	8.25	8.26	8.31	8.31													YGL010W	>0.9999	YHR204W	0.2059	YHR019C	>0.9999	YJL187C	>0.9999
YDL133W	7.16	7.09	7.16	7.25	7.12	6.97	7.39	7.43	7.18	7.16	7.38	7.37	7.53	7.39	7.37	7.36													YPL103C	>0.9999	YLR408C	0.9405	YCR089W	>0.9999	YNL126W	>0.9999
YDL134C	8.88	9.4	9.06	9.15	9.14	9.1	9.41	9.32	9.25	8.91	9.11	9.09	9	9.15	9.37	9.41													YFR049W	>0.9999	YGL061C	>0.9999	YMR084W	0.0722	YDR371W	>0.9999
YDL135C	9.04	9.31	8.99	9.16	8.81	8.86	9.07	9.11	8.72	9.32	9.7	9.56	8.94	8.99	9.13	9.16													YCR028C	>0.9999	YDL191W	>0.9999	YNL031C	>0.9999	YDR510W	>0.9999
YDL137W	10.98	11.15	10.7	10.8	11.16	11.09	10.81	10.9	11.32	11.15	10.95	10.9	11.4	11.31	10.93	10.99													YBR055C	>0.9999	YLR329W	>0.9999	YER074W	>0.9999	YJL173C	>0.9999
YDL138W	7.3	7.53	7.3	7.41	7.45	7.16	7.6	7.37	7.62	7.12	7.13	7.08	7.16	7.26	7.45	7.37													YCR061W	>0.9999	YGR275W	>0.9999	YMR298W	>0.9999	YBL059C-A	>0.9999
YDL139C	5.98	5.9	5.56	5.67	5.95	5.82	5.57	5.54	5.75	5.88	5.77	5.83	5.94	6.14	5.65	5.62													YJL023C	>0.9999	YIR035C	0.9666	YMR164C	>0.9999	YLR285C-A	>0.9999
YDL140C	10.59	10.98	10.44	10.21	10.82	10.39	10.15	10.09	10.22	10.89	9.53	9.35	10.69	10.55	10.05	10.03													YPR098C	>0.9999	YOR147W	>0.9999	YDR035W	>0.9999	YER164W	>0.9999
YDL141W	7.44	7.82	7.81	7.82	7.1	7.2	7.72	7.74	7.04	7.45	7.78	7.64	7.21	7.23	7.64	7.71													YAL021C	>0.9999	YDL130W	>0.9999	YPR149W	>0.9999	YGR224W	>0.9999
YDL142C	6.07	6.38	6.52	6.69	6.39	6.48	7.13	6.93	6.56	6.02	6.77	6.79	6.44	6.6	7.1	7													YDR202C	>0.9999	YIL016W	0.1671	YEL016C	0.9547	YIL140W	>0.9999
YDL143W	10.7	10.74	10.57	10.63	10.38	10.49	10.43	10.42	10.5	10.81	10.54	10.54	10.38	10.42	10.39	10.32													YLR154C	>0.9999	YDR515W	0.999	YDR213W	>0.9999	YLR080W	>0.9999
YDL144C	8.26	8.33	8.2	8.31	8.31	8.2	8.23	8.23	8.4	8.39	8.2	8.23	8.24	8.3	8.27	8.16													YPL088W	>0.9999	YJL096W	>0.9999	YBR111C	>0.9999	YPL204W	>0.9999
YDL145C	10.59	10.33	10.41	10.34	10.59	10.42	10.18	10.25	10.25	10.77	10.16	10.06	10.7	10.62	10.17	10.23													YBR092C	>0.9999	YKR001C	>0.9999	YDR286C	>0.9999	YCL008C	>0.9999
YDL146W	5.9	6.28	6.22	6.43	6.81	6.48	6.72	6.67	6.16	5.93	6.39	6.25	6.48	6.55	6.77	6.77													YKR018C	>0.9999	YDR385W	>0.9999	YJR094C	0.2994	YPL233W	>0.9999
YDL147W	10.04	9.59	9.81	9.88	9.66	9.81	9.69	9.77	9.89	9.91	10.03	9.98	9.6	9.45	9.61	9.63													YER106W	>0.9999	YOL052C	>0.9999	YEL018W	>0.9999	YNL077W	>0.9999
YDL148C	9.43	8.79	9	8.65	8.53	8.69	7.9	8.07	8.02	9.53	8.64	8.69	8.78	8.78	7.81	7.87													YBR060C	>0.9999	YBR291C	0.8801	YLR375W	>0.9999	YJL133C-A	>0.9999
YDL149W	6.12	6.23	5.74	6.37	6.25	6.36	6.28	6.49	6.81	5.97	5.96	5.97	6.42	6.12	6.32	6.36													YBR194W	>0.9999	YBR172C	0.9831	YGR128C	>0.9999	YBR033W	>0.9999
YDL150W	8	7.77	7.86	7.52	7.43	7.5	7.19	7.2	7.35	8.14	7.62	7.73	7.99	7.73	7.04	7													YJR047C	>0.9999	YHR212W-A	>0.9999	YGL194C	>0.9999	YOR234C	>0.9999
YDL153C	9.73	9.5	9.32	8.9	9.01	9.19	8.3	8.19	8.88	9.89	8.83	8.92	9.05	9.09	7.99	8													YPL091W	>0.9999	YDL157C	0.304	YBR203W	>0.9999	YKL212W	>0.9999
YDL154W	5.3	5.82	5.23	5.5	5.81	5.31	5.31	5.47	5.84	5.65	5.4	5.29	6.05	5.94	5.52	5.62													YOR214C	>0.9999	YDR003W-A	>0.9999	YER061C	>0.9999	YOR087W	>0.9999
YDL155W	9.11	9.5	9.65	9.54	9.77	9.63	9.61	9.57	9.57	9.31	9.48	9.56	9.46	9.93	9.65	9.85													YCL047C	>0.9999	YDR370C	>0.9999	YDR266C	>0.9999	YOL090W	>0.9999
YDL156W	7.27	7.45	6.8	7.03	8.1	7.71	6.87	6.87	7.62	7.64	6.63	6.52	7.64	7.68	7.15	7.02													YJR031C	>0.9999	YOR112W	>0.9999	YGL247W	>0.9999	YMR074C	>0.9999
YDL157C	8.92	8.55	8.5	8.54	8.92	9.23	8.58	8.46	9.09	9.1	9.05	9.05	8.94	9.13	8.53	8.62													YML037C	>0.9999	YPR065W	>0.9999	YDR357C	>0.9999	YGR082W	>0.9999
YDL159W	6.1	6.29	6.03	6.08	6.04	5.93	5.98	5.9	6.2	6.2	6.01	6.12	6.26	6.22	5.81	5.77													YDR362C	>0.9999	YKR051W	>0.9999	YLR007W	>0.9999	YDR505C	>0.9999
YDL159W-A	3.13	2.46	3.04	2.64	4	2.85	2.75	3.23	2.74	2.75	2.71	2.65	2.47	2.54	2.7	2.81													YPL047W	>0.9999	YKL075C	>0.9999	YBL076C	>0.9999	YNL239W	>0.9999
YDL160C	9.66	8.47	9.36	9.45	9.35	9.55	9.16	9.24	9.04	8.73	8.56	8.28	8.07	8.3	9.13	9.1													YBL020W	>0.9999	YLL014W	>0.9999	YKR028W	>0.9999	YNL117W	>0.9999
YDL160C-A	6.22	6.46	5.81	6.22	6.04	6.52	6.37	5.91	6.09	6.29	6.46	6.45	6.04	6.15	6.17	6.13													YOL075C	>0.9999	YPR120C	>0.9999	YGL106W	>0.9999	YPR109W	>0.9999
YDL161W	8.08	7.9	7.77	7.76	7.91	7.9	7.71	7.69	7.81	8.04	7.69	7.68	7.85	7.75	7.64	7.6													YBL026W	>0.9999	YBL039W-A	0.9885	YPR181C	>0.9999	YGL235W	>0.9999
YDL164C	7.85	7.87	7.84	7.76	8.01	8.08	7.84	7.93	7.69	8.03	7.88	7.83	8	8.14	7.89	7.99													YLR352W	>0.9999	YNL137C	>0.9999	YOL112W	>0.9999	YBR201W	>0.9999
YDL165W	8.29	8.88	8.54	8.48	8.49	8.55	8.6	8.44	8.42	8.68	8.89	8.9	8.75	8.94	8.6	8.56													YJR032W	>0.9999	YLR390W	>0.9999	YHR191C	>0.9999	YKL084W	>0.9999
YDL166C	8.66	8.63	8.69	8.57	8.46	8.7	8.3	8.37	8.44	8.61	8.81	8.85	8.47	8.51	8.35	8.23													YOR051C	>0.9999	YNR037C	0.9952	YJL062W	>0.9999	YAL034W-A	>0.9999
YDL167C	8.89	8.23	8.7	8.01	8.2	8.23	7.65	7.71	8	8.54	7.8	7.83	8.6	8.31	7.51	7.47													YDR050C	0.4674	YDR341C	0.9995	YKL173W	>0.9999	YJR135C	>0.9999
YDL168W	9.1	9.07	9.46	9.35	9.29	9.34	9.38	9.34	9.44	9.16	9.3	9.43	9.17	9.2	9.34	9.45													YBR248C	>0.9999	YCL058C	>0.9999	YBR168W	0.1244	YPL032C	>0.9999
YDL169C	5.22	5.93	4.93	5.35	5.83	5.78	5.97	5.83	7.1	5.4	5.51	5.48	5.39	5.58	6.21	5.99													YPR179C	>0.9999	YMR218C	>0.9999	YPL038W-A	>0.9999	YDR158W	0.9997
YDL170W	7.17	7.51	7.54	7.45	7.87	7.81	7.98	7.48	8.07	7.33	7.04	7.14	7.98	7.84	7.63	7.53													YKR055W	>0.9999	YBR150C	>0.9999	YJL187C	>0.9999	YGR181W	>0.9999
YDL171C	10.44	10.45	10.49	10.42	10.71	10.42	10.53	10.45	11.01	10.67	9.83	9.74	10.26	10.43	10.49	10.46													YPL121C	>0.9999	YMR284W	0.6523	YNL126W	0.8306	YPR052C	>0.9999
YDL173W	9.27	8.73	8.94	8.94	9.54	9.62	8.84	8.89	9.44	9.16	9.2	9.37	9.19	9.42	8.9	8.88													YPR122W	>0.9999	YNL255C	>0.9999	YMR095C	>0.9999	YLR005W	>0.9999
YDL174C	9.39	9.93	10.1	10.19	9.53	9.67	9.97	10.19	8.88	9.35	9.96	9.85	9.69	9.65	10.14	10.1													YBL072C	>0.9999	YDR459C	>0.9999	YDR371W	>0.9999	YMR287C	>0.9999
YDL175C	6.87	6.64	6.9	6.95	7.22	7.08	7.02	7.1	6.48	6.72	6.84	6.85	6.79	6.8	6.95	7.05													YLR455W	>0.9999	YDR469W	0.9983	YDR510W	0.7013	YLR264C-A	>0.9999
YDL176W	6.73	6.84	6.59	6.57	6.55	6.31	6.54	6.69	6.51	6.97	6.7	6.32	7.13	6.8	6.63	6.64													YDL093W	>0.9999	YDR529C	>0.9999	YJL173C	>0.9999	YOL092W	>0.9999
YDL177C	6.85	6.57	6.28	6.62	6.65	6.7	6.39	6.39	6.86	6.87	6.42	6.65	6.7	6.54	6.41	6.33													YAL009W	>0.9999	YAL013W	>0.9999	YBL059C-A	>0.9999	YDR043C	>0.9999
YDL178W	8.76	9	9.31	9.13	9.02	9.11	9.37	9.21	8.96	8.85	9.3	9.31	9.2	9.31	9.2	9.23													YJR016C	>0.9999	YFL041W	>0.9999	YER164W	>0.9999	YBR138C	>0.9999
YDL179W	8.02	7.8	7.76	7.66	8.16	7.99	7.67	7.59	7.64	8.14	7.67	7.78	8.12	7.97	7.55	7.57													YCR020C-A	>0.9999	YDR479C	>0.9999	YGR224W	0.9968	YBR234C	>0.9999
YDL180W	7.57	7.6	7.36	7.82	7.69	7.5	7.79	7.76	7.73	7.65	7.6	7.68	7.67	7.49	7.74	7.76													YPL084W	>0.9999	YOR067C	>0.9999	YIL140W	0.6294	YIL106W	>0.9999
YDL181W	9.59	9.64	9.05	9.49	9.55	9.5	9.17	9.39	10.3	9.9	9.93	9.81	9.25	9.69	9.66	9.5													YOR107W	>0.9999	YCR065W	0.1857	YLR080W	>0.9999	YOL069W	>0.9999
YDL182W	12.13	12.27	12.21	12.14	11.94	12	12.23	11.95	12.05	12	11.65	11.69	11.95	11.85	11.74	11.41													YDL132W	>0.9999	YER092W	0.6896	YPL204W	>0.9999	YLR078C	>0.9999
YDL183C	6.5	6.74	7.01	7.03	7.06	6.76	7.35	6.85	6.39	6.69	6.12	5.62	7.16	7.11	6.7	6.18													YGR040W	>0.9999	YGL060W	>0.9999	YCL008C	>0.9999	YDR170C	>0.9999
YDL184C	12.02	12.07	10.45	11.64	11.57	11.23	10.7	11.34	11.28	12.06	11.65	11.85	12.2	12.06	10.66	10.45													YDR205W	>0.9999	YKR071C	>0.9999	YPL233W	0.992	YMR148W	>0.9999
YDL185W	11.57	11.89	11.25	11.47	11.72	11.7	11.62	11.56	11.68	11.75	11.46	11.29	11.46	11.83	11.61	11.65													YGR140W	>0.9999	YJL127C	>0.9999	YNL077W	>0.9999	YMR313C	>0.9999
YDL186W	2.9	3.43	2.75	3.02	3.15	2.89	2.86	2.65	2.76	2.82	2.64	2.75	2.76	3.06	3.12	2.93													YDL082W	>0.9999	YHR019C	>0.9999	YJL133C-A	>0.9999	YNR039C	>0.9999
YDL188C	8.37	8.42	8.56	8.56	8.47	8.48	8.67	8.61	8.6	8.42	8.49	8.46	8.66	8.64	8.73	8.63													YGL027C	>0.9999	YMR084W	>0.9999	YBR033W	>0.9999	YOR324C	>0.9999
YDL189W	8.76	8.98	8.46	8.43	8.78	8.52	8.25	8.29	8.53	8.9	8.4	8.35	8.92	8.66	8.26	8.26													YBR272C	>0.9999	YNL031C	>0.9999	YOR234C	>0.9999	YER098W	>0.9999
YDL190C	9.12	9.59	9.1	9.06	9.15	9.1	9.06	9.06	9.11	9.09	8.89	8.96	9.34	9.34	9.04	9.03													YOR197W	>0.9999	YER074W	>0.9999	YKL212W	>0.9999	YJL128C	>0.9999
YDL191W	12.27	12.21	12.28	12.32	12.22	12.27	12.27	12.34	12.22	12.33	12.41	12.39	12.3	12.26	12.35	12.31													YBR029C	>0.9999	YMR298W	0.5386	YOR087W	>0.9999	YHR175W	>0.9999
YDL192W	11.62	11.81	11.48	11.54	11.67	11.68	11.54	11.6	11.6	11.77	11.73	11.78	11.62	11.69	11.62	11.66													YPR023C	>0.9999	YMR164C	0.076	YOL090W	>0.9999	YHR208W	0.122
YDL193W	7.16	7.47	7.53	7.6	7.43	7.44	7.56	7.64	7.26	7.03	7.67	7.47	7.41	7.56	7.65	7.65													YPL163C	>0.9999	YDR035W	0.7611	YMR074C	>0.9999	YFL007W	>0.9999
YDL194W	5.84	6.46	5.9	6.01	6.02	5.56	5.91	5.9	6.56	6.05	5.59	5.66	6.16	6	5.99	6.06													YJR010W	>0.9999	YPR149W	>0.9999	YGR082W	>0.9999	YDL006W	>0.9999
YDL195W	10.34	10.54	9.89	9.97	10.43	10.24	9.96	9.92	10.08	10.58	9.29	9.19	10.32	10.08	9.95	9.88													YGR233C	>0.9999	YEL016C	>0.9999	YDR505C	>0.9999	YBR290W	>0.9999
YDL197C	6.59	6.46	6.11	6.43	6.88	6.62	6.57	6.44	6.52	6.61	6.03	6.07	6.41	6.57	6.62	6.43													YHR117W	>0.9999	YDR213W	>0.9999	YNL239W	0.9994	YEL003W	>0.9999
YDL198C	10.56	10.36	10.82	10.76	11.06	11.08	11.01	10.6	11.03	10.32	10.27	10.37	10.55	10.95	10.77	10.74													YBR278W	>0.9999	YBR111C	0.7611	YNL117W	>0.9999	YLR283W	>0.9999
YDL199C	5.19	5.95	5.13	5.85	6.08	5.72	5.94	6.04	6	5.41	5.52	5.4	5.76	5.87	6.03	6.03													YBR089C-A	>0.9999	YDR286C	>0.9999	YPR109W	>0.9999	YGR206W	>0.9999
YDL200C	7.49	7.32	6.85	7.22	7.07	7.33	6.91	6.98	8.37	7.5	7.42	7.53	7.19	7.31	7.08	7.01													YLR348C	>0.9999	YJR094C	0.7943	YBR201W	>0.9999	YDR517W	>0.9999
YDL201W	8.52	8.56	8.7	8.33	8.08	8.4	8.06	8.09	8.11	8.65	8.47	8.56	8.35	8.32	7.89	7.9													YOR167C	>0.9999	YEL018W	>0.9999	YKL084W	>0.9999	YJR102C	>0.9999
YDL202W	7.59	7.75	7.66	7.78	7.89	7.97	7.8	7.68	7.54	7.76	8	8.04	7.91	8.01	7.75	7.63													YOR259C	>0.9999	YLR375W	>0.9999	YAL034W-A	>0.9999	YGR014W	>0.9999
YDL203C	7.49	7.5	7.79	7.58	7.57	7.42	7.56	7.67	7.46	7.52	7.62	7.57	7.28	7.62	7.82	7.81													YMR080C	>0.9999	YBR203W	>0.9999	YJR135C	>0.9999	YBR145W	>0.9999
YDL204W	6.11	6.39	5.55	6.3	6.67	6.45	6.09	6.11	6.87	5.91	5.58	5.45	5.87	6.24	5.94	5.61													YLR054C	>0.9999	YER061C	>0.9999	YPL032C	>0.9999	YPL098C	>0.9999
YDL205C	7.22	7.06	7.77	7.61	7.06	7.19	7.34	7.42	6.97	7.17	7.4	7.56	6.73	7.08	7.32	7.33													YER068W	>0.9999	YDR266C	>0.9999	YDR158W	>0.9999	YOR355W	>0.9999
YDL206W	5.82	6.6	5.81	6.31	6.82	6.34	6.73	6.43	6.81	6.02	6.13	6.14	6.39	6.6	6.65	6.5													YJL136W-A	>0.9999	YGL247W	>0.9999	YGR181W	>0.9999	YNL327W	>0.9999
YDL207W	7.58	7.38	7.72	7.52	7.42	7.29	7.6	7.59	7.27	7.55	7.4	7.36	7.52	7.43	7.66	7.68													YNL159C	>0.9999	YDR357C	0.9405	YPR052C	>0.9999	YDL200C	>0.9999
YDL208W	11.8	11.81	11.18	11.2	11.54	11.62	10.91	10.89	11.56	11.99	11.17	11.26	11.59	11.61	10.89	10.78													YNL153C	>0.9999	YLR007W	>0.9999	YLR005W	>0.9999	YIL169C	>0.9999
YDL209C	7.12	6.9	6.72	6.77	6.84	7.01	6.56	6.5	6.62	7.21	6.89	7.01	7.15	7.14	6.58	6.38													YGR207C	>0.9999	YBL076C	0.9233	YMR094W	>0.9999	YLR021W	>0.9999
YDL210W	4.77	4.85	5.34	5.17	4.86	4.91	5.49	5.64	6.02	4.96	5.36	5.64	4.93	5.01	6.54	6.06													YHL040C	>0.9999	YKR028W	0.7943	YLR264C-A	0.3267	YLR029C	>0.9999
YDL211C	6.86	6.46	6.77	6.94	7.02	6.75	7.11	7.14	6.78	7.03	6.92	7.08	7.11	7.07	6.96	7.04													YMR295C	>0.9999	YGL106W	>0.9999	YOL092W	>0.9999	YOR267C	>0.9999
YDL212W	10.16	10.36	10.34	10.47	10.19	10.26	10.37	10.38	10.13	10.24	10.75	10.73	10.24	10.4	10.34	10.27													YDL154W	>0.9999	YPR181C	0.9405	YDR043C	>0.9999	YDR200C	>0.9999
YDL213C	10.15	9.61	9.49	9.3	9.86	10.03	8.87	8.77	10.06	10.16	9.14	9.3	9.48	9.6	8.76	8.76													YML087C	>0.9999	YOL112W	>0.9999	YBR138C	0.4853	YKL135C	>0.9999
YDL214C	3.7	3.96	3.83	3.61	4.34	3.9	3.97	3.86	3.9	3.85	3.83	3.57	4.14	4.12	3.79	4.03													YPL260W	>0.9999	YHR191C	0.5386	YBR234C	>0.9999	YFL056C	>0.9999
YDL215C	7.72	8.01	7.84	7.82	8.09	7.9	8.15	8.11	8.98	7.86	7.91	7.89	8.05	8.06	8.13	8.15													YCL005W-A	>0.9999	YJL062W	0.5014	YIL106W	>0.9999	YJL205C	>0.9999
YDL216C	5.1	5.24	4.95	5.31	5.46	5.32	5.55	5.65	5.15	5.14	5.28	5.38	5.52	5.59	5.46	5.75													YDL044C	>0.9999	YKL173W	0.9233	YOL069W	>0.9999	YKL054C	>0.9999
YDL217C	7.4	7.84	7.28	7.24	7.11	7.46	7.1	7.07	7.21	7.52	7.34	7.5	7.13	7.23	7.1	6.96													YDR014W	>0.9999	YBR168W	>0.9999	YLR078C	>0.9999	YMR308C	>0.9999
YDL218W	4.38	4.61	4.13	4.1	4.25	4.05	3.92	4.11	3.92	4.64	4.26	4.3	4.12	4.06	3.96	3.94													YJR125C	>0.9999	YPL038W-A	>0.9999	YDR170C	>0.9999	YBR153W	>0.9999
YDL219W	8.42	8.33	8.58	8.65	8.52	8.81	8.81	8.71	8.43	8.41	9.07	9.07	8.35	8.53	8.76	8.84													YDR302W	>0.9999	YJL187C	>0.9999	YMR148W	>0.9999	YLR393W	>0.9999
YDL220C	5.72	5.84	5.48	5.57	5.71	5.61	5.5	5.41	5.69	6.02	5.15	5.28	5.93	5.76	5.64	5.41													YBR176W	>0.9999	YNL126W	>0.9999	YMR313C	>0.9999	YGL028C	>0.9999
YDL222C	5.27	5.94	5.46	5.72	5.36	5.31	5.97	5.71	5.3	5.02	5.01	4.93	4.47	4.77	5.46	5.3													YOR339C	>0.9999	YDR371W	0.2278	YNR039C	>0.9999	YLR030W	>0.9999
YDL223C	5.76	6.01	5.74	5.67	5.79	5.64	5.68	5.61	6.12	5.72	4.99	4.65	4.95	4.96	5.54	5.49													YPL214C	>0.9999	YJL173C	0.9999	YOR324C	>0.9999	YML097C	>0.9999
YDL224C	9.05	9.33	8.9	8.91	9.52	9.17	9.02	8.95	8.98	9.11	8.44	8.35	9.32	9.26	8.94	8.98													YGR044C	>0.9999	YBL059C-A	0.333	YER098W	>0.9999	YER025W	>0.9999
YDL225W	9.48	9.14	9.08	9.11	9.46	9.29	9	9.03	9.14	9.55	9.02	9.12	9.55	9.43	8.92	8.98													YLR238W	>0.9999	YER164W	0.1501	YJL128C	>0.9999	YGL010W	>0.9999
YDL226C	7.98	7.69	7.99	8.11	7.72	7.97	8.03	8.09	7.7	7.71	8.33	8.28	7.75	7.86	8.09	8.05													YDL045W-A	>0.9999	YIL140W	0.8254	YHR175W	>0.9999	YPL103C	0.718
YDL227C	1.85	1.69	3.24	4	3.35	3.82	3.28	3.26	4.1	1.78	2.68	1.97	1.4	2.02	3.69	3.46													YGR090W	0.9464	YLR080W	>0.9999	YHR208W	>0.9999	YFR049W	>0.9999
YDL229W	12.72	12.76	12.81	12.71	12.46	12.49	12.64	12.65	12.33	12.79	12.63	12.6	12.61	12.54	12.61	12.58													YJL191W	>0.9999	YPL204W	0.9549	YFL007W	>0.9999	YCR028C	>0.9999
YDL229W	12.82	12.87	12.84	12.78	12.71	12.72	12.77	12.74	12.67	12.85	12.7	12.7	12.79	12.79	12.75	12.75													YMR133W	>0.9999	YCL008C	0.9405	YDL006W	>0.9999	YBR055C	>0.9999
YDL230W	6.97	7.27	6.91	7.11	7.17	7.1	7.44	7.32	7.52	7.07	7.03	7.16	7.18	7.18	7.45	7.46													YNL254C	>0.9999	YPL233W	0.3637	YBR290W	>0.9999	YCR061W	>0.9999
YDL231C	8.09	8.76	7.84	7.91	8.15	7.97	7.93	7.95	8.36	8.27	7.74	7.9	8.6	8.44	7.91	7.89													YIL116W	>0.9999	YNL077W	0.9885	YEL003W	>0.9999	YJL023C	>0.9999
YDL232W	9.06	8.94	9.11	9.26	9.16	9.22	9.42	9.28	8.95	9.22	9.51	9.44	8.95	9.15	9.4	9.21													YBL005W	>0.9999	YJL133C-A	>0.9999	YLR283W	>0.9999	YPR098C	>0.9999
YDL233W	6.43	6.53	6.35	6.61	6.41	6.27	6.52	6.42	6.68	6.35	6.33	6.34	6.3	6.4	6.47	6.56													YBR022W	>0.9999	YBR033W	0.9233	YGR206W	>0.9999	YAL021C	>0.9999
YDL234C	6.67	7.36	6.85	6.89	6.8	6.75	7.24	7.09	7	6.62	6.65	6.58	6.87	6.93	7.22	7.22													YIL131C	>0.9999	YOR234C	>0.9999	YDR517W	>0.9999	YDR202C	>0.9999
YDL235C	8.47	8.18	8.79	8.86	8.08	8.26	8.74	8.73	8.39	8.47	9.07	9.02	8.03	8.16	8.65	8.74													YBR171W	>0.9999	YKL212W	>0.9999	YJR102C	>0.9999	YLR154C	>0.9999
YDL236W	9.28	9.51	9.54	9.6	9.31	9.35	9.57	9.55	9.1	9.22	9.84	9.7	9.16	9.35	9.56	9.54													YOR204W	>0.9999	YOR087W	>0.9999	YGR014W	>0.9999	YPL088W	0.7588
YDL237W	8.42	9.15	8.89	8.98	8.62	8.83	9.12	9.19	9.12	8.58	9.11	9.11	8.82	8.9	9.22	9.18													YDR143C	>0.9999	YOL090W	>0.9999	YBR145W	0.1005	YBR092C	>0.9999
YDL238C	4.75	4.71	4.81	4.89	5.35	5.56	5.13	5.08	6.57	4.35	4.74	4.73	4.63	4.87	5.4	5.3													YOL067C	>0.9999	YMR074C	0.9999	YPL098C	>0.9999	YKR018C	>0.9999
YDL239C	6.02	6.38	5.83	6.19	7.04	6.28	6.43	6.45	7.29	6.03	5.79	5.64	6.69	6.51	6.58	6.45													YBR083W	>0.9999	YGR082W	>0.9999	YOR108W	>0.9999	YER106W	>0.9999
YDL240W	6.78	6.32	6.8	6.94	6.72	6.29	6.88	6.93	6	6.74	6.78	6.61	7.08	6.86	6.87	6.83													YHR022C	>0.9999	YDR505C	>0.9999	YOR355W	>0.9999	YBR060C	>0.9999
YDL241W	6.47	6.87	5.94	6.11	6.07	6.3	5.78	5.41	5.73	6.7	5.59	5.63	6.36	6.68	5.27	5.38													YML129C	>0.9999	YNL239W	>0.9999	YNL327W	>0.9999	YBR194W	>0.9999
YDL243C	4.26	5.37	4.19	3.99	4.27	4.41	4.29	4.13	5.05	4.74	4.24	4.19	4.72	4.78	4.25	4.48													YKL088W	>0.9999	YNL117W	>0.9999	YDL200C	>0.9999	YJR047C	>0.9999
YDL243C	7.76	8.2	7.14	7.56	8.1	7.96	7.78	7.73	8.32	7.84	7.13	7.32	8.06	7.97	7.83	7.71													YOR075W	>0.9999	YPR109W	>0.9999	YIL169C	>0.9999	YPL091W	>0.9999
YDL244W	4.97	5.47	4.9	4.96	5.27	5.23	5.3	5.15	5.67	5.1	4.86	5.01	4.88	4.85	5.38	5.19													YOL123W	>0.9999	YGL235W	>0.9999	YLR021W	>0.9999	YOR214C	>0.9999
YDL245C	3.11	2.81	3.2	2.45	3.48	3.09	3.37	3.08	2.79	2.78	2.45	2.59	2.67	2.42	2.85	3													YNL045W	>0.9999	YBR201W	>0.9999	YLR029C	>0.9999	YCL047C	>0.9999
YDL246C	3.68	3.96	3.86	3.95	3.96	3.53	3.98	4.05	4.25	4.12	4.1	4.43	3.81	4.13	4.33	4.38													YGR088W	>0.9999	YKL084W	0.9999	YOR267C	>0.9999	YJR031C	>0.9999
YDL247W	4.31	4.34	3.76	4.05	4.96	4.28	4.21	4.12	4.19	4.16	3.81	4.02	4.28	4.32	4.13	4.04													YBL099W	>0.9999	YAL034W-A	>0.9999	YDR200C	>0.9999	YML037C	>0.9999
YDL247W	3.51	3.61	3.05	2.96	3.67	2.55	3	3.3	2.95	3.7	3.37	3.3	3.47	3.54	3.11	3.1													YDR191W	>0.9999	YJR135C	>0.9999	YKL135C	>0.9999	YDR362C	>0.9999
YDL248W	6.23	6.13	6.28	6.68	6.67	6.56	6.95	6.93	6.61	5.94	6.59	6.45	6.38	6.62	7.02	7.03													YIL052C	>0.9999	YDR158W	>0.9999	YFL056C	>0.9999	YPL047W	>0.9999
YDR001C	8.79	9.34	8.59	8.83	9.18	9.2	9.04	8.95	9.93	8.86	8.55	8.35	8.8	9.04	9.1	8.97													YMR244W	>0.9999	YPL168W	0.0855	YJL205C	>0.9999	YBL020W	>0.9999
YDR002W	10.87	10.89	10.93	10.93	10.79	10.88	10.81	10.84	11	10.86	11.25	11.26	10.8	11.01	10.79	10.77													YER078W-A	>0.9999	YGR181W	>0.9999	YKL054C	>0.9999	YOL075C	>0.9999
YDR003W	6.93	7.42	7.05	7.36	7.24	7.42	7.52	7.48	7.92	6.75	7.6	7.72	7.17	7.43	7.42	7.49													YPR061C	>0.9999	YPR052C	>0.9999	YMR308C	>0.9999	YBL026W	>0.9999
YDR003W-A	7.95	8.67	7.82	8.23	8.19	8.16	8.37	8.35	8.54	8.1	8.34	8.4	8.56	8.5	8.38	8.42													YNR038W	>0.9999	YLR005W	>0.9999	YBR153W	>0.9999	YLR352W	>0.9999
YDR004W	6.97	6.89	6.96	7.11	7.17	7.15	7.2	7.26	6.88	6.98	7.22	7.37	7.21	7.02	7.29	7.21													YDR506C	>0.9999	YMR287C	>0.9999	YLR393W	>0.9999	YJR032W	>0.9999
YDR005C	7.53	7.29	7.59	7.62	7.62	7.7	7.75	7.9	7.68	7.53	7.65	7.6	7.5	7.62	7.92	7.94													YLR443W	>0.9999	YOL092W	>0.9999	YGL028C	>0.9999	YOR051C	>0.9999
YDR006C	9.22	9.41	9.24	8.75	9	8.72	8.58	8.63	9.1	9.49	8.75	8.74	9.11	8.97	8.55	8.58													YPL117C	>0.9999	YDR043C	0.1671	YML097C	>0.9999	YDR050C	>0.9999
YDR009W	4.45	4.59	4.17	4.36	4.29	4.21	4.23	4.22	4.98	4.24	4.07	4.01	3.96	4.12	4.38	4.4													YGR192C	>0.9999	YBR234C	>0.9999	YER025W	>0.9999	YBR248C	>0.9999
YDR011W	8.79	8.73	8.98	8.73	9.04	8.76	8.98	8.8	8.87	8.7	8.15	8.04	8.88	8.93	8.56	8.64													YPR107C	>0.9999	YIL106W	>0.9999	YGL010W	>0.9999	YPR179C	>0.9999
YDR012W	11.25	11.09	11.48	11.38	11.29	11.24	11.26	11.35	11.19	11.13	11.13	11.08	11.31	11.25	11.22	11.25													YNL009W	>0.9999	YLR078C	0.9924	YFR049W	>0.9999	YKR055W	>0.9999
YDR013W	6.62	6.71	6.88	7.15	7.12	7.31	7.31	7.22	6.92	6.74	7.13	7.12	6.86	6.99	7.5	7.48													YPL075W	>0.9999	YDR170C	0.9831	YCR028C	>0.9999	YPL121C	>0.9999
YDR014W	5.25	4.85	5.14	5.3	5.03	4.94	5.09	5.05	4.91	4.92	5.12	5.11	4.85	4.71	5.02	5.09													YDR198C	>0.9999	YMR148W	>0.9999	YBR055C	0.9948	YPR122W	>0.9999
YDR016C	6.92	7.18	6.72	7.14	7.09	7.24	7.37	7.26	6.89	7.05	7.18	7.29	7.48	7.25	7.28	7.25													YNL071W	>0.9999	YMR313C	>0.9999	YCR061W	0.2497	YBL072C	>0.9999
YDR017C	8.45	8.34	8.68	8.36	8.32	8.05	8.3	8.41	8.06	8.41	8.44	8.33	8.89	8.6	8.37	8.37													YGR124W	>0.9999	YNR039C	>0.9999	YJL023C	>0.9999	YLR455W	>0.9999
YDR018C	3.91	3.94	3.6	4.05	4	3.76	4.35	4.17	4.73	3.6	3.9	4	3.38	3.38	4.28	4.15													YDR078C	>0.9999	YOR324C	>0.9999	YPR098C	>0.9999	YDL093W	>0.9999
YDR019C	7.9	7.94	9.78	9.26	8.62	8.63	9.8	10.11	9.07	7.82	9.2	9.14	8.83	9.23	9.97	10.04													YLR040C	>0.9999	YER098W	>0.9999	YAL021C	>0.9999	YAL009W	>0.9999
YDR020C	6.37	6.2	6.62	6.13	5.56	6.08	5.8	5.86	5.49	6.3	6.33	6.41	5.64	5.6	5.82	5.76													YOR354C	>0.9999	YJL128C	>0.9999	YDR202C	>0.9999	YJR016C	>0.9999
YDR021W	8.23	7.53	8.24	7.44	6.74	7.27	6.61	6.79	7.27	8.02	7.58	7.75	7.33	6.96	6.58	6.47													YJR005C-A	>0.9999	YHR175W	>0.9999	YLR154C	>0.9999	YCR020C-A	>0.9999
YDR022C	6.26	6.4	6.41	6.47	6.53	6.55	6.82	6.83	7.07	6.27	6.52	6.62	6.32	6.27	7	6.88													YJR051W	>0.9999	YHR208W	>0.9999	YPL088W	>0.9999	YPL084W	>0.9999
YDR023W	11.06	10.89	11.14	11.08	10.82	10.91	10.87	11.02	10.71	10.86	10.98	10.97	10.64	10.75	10.88	10.93													YHR074W	>0.9999	YDL006W	>0.9999	YBR092C	>0.9999	YOR107W	>0.9999
YDR025W	11.8	11.69	12.08	12.03	11.83	11.82	12.04	12.07	11.79	11.9	12.06	12.11	11.8	11.84	12.08	11.99													YJL204C	>0.9999	YBR290W	>0.9999	YKR018C	>0.9999	YDL132W	>0.9999
YDR026C	7.76	7.63	7.68	7.53	7.63	7.17	7.32	7.41	7.48	7.88	7.41	7.46	7.63	7.56	7.36	7.45													YBL091C	>0.9999	YLR283W	>0.9999	YBR060C	>0.9999	YGR040W	>0.9999
YDR027C	7.41	7.37	7.33	7.68	7.91	7.5	7.76	7.76	7.49	7.37	7.28	7.31	7.8	7.78	7.74	7.74													YPL181W	>0.9999	YGR206W	0.999	YBR194W	>0.9999	YDR205W	>0.9999
YDR028C	8.58	8.7	8.3	8.39	8.75	8.42	8.32	8.36	8.3	8.72	8.23	8.22	8.85	8.85	8.16	8.29													YOL072W	>0.9999	YDR517W	>0.9999	YJR047C	>0.9999	YGR140W	>0.9999
YDR030C	7.4	7.28	7.06	6.63	7.09	6.99	6.68	6.66	7.93	7.27	6.6	6.8	7.25	7.01	6.76	6.53													YER136W	>0.9999	YJR102C	>0.9999	YPL091W	>0.9999	YDL082W	>0.9999
YDR031W	6.5	6.88	6.52	6.73	7.16	7.15	7.11	7.05	6.94	6.94	7.43	7.52	7.21	7.54	6.98	7.14													YER101C	>0.9999	YPL098C	>0.9999	YOR214C	>0.9999	YGL027C	>0.9999
YDR032C	10.88	11.24	10.73	10.89	11	11	10.92	10.97	11.3	10.93	11.05	10.96	10.79	11.01	10.93	10.92													YHR177W	>0.9999	YOR108W	>0.9999	YCL047C	>0.9999	YBR272C	>0.9999
YDR033W	12.29	12.27	12.15	12.22	12.23	12.18	12.32	12.33	11.77	12.2	12.16	12.01	12.19	12.23	12.39	12.32													YNR055C	>0.9999	YOR355W	0.3637	YJR031C	>0.9999	YOR197W	>0.9999
YDR034C	9	9.08	8.54	8.81	8.9	8.75	8.72	8.6	9.41	8.62	8.31	8.05	8.9	8.61	8.53	8.48													YNL321W	>0.9999	YDL200C	0.9032	YML037C	0.0901	YBR029C	>0.9999
YDR034C-A	5.98	4.4	7.06	6.79	6.67	7.11	7.44	7	7.73	3.85	6.19	6.41	5.17	5.4	6.7	6.34													YOR289W	>0.9999	YIL169C	>0.9999	YDR362C	>0.9999	YPR023C	>0.9999
YDR034W-B	5.76	3.84	5.69	6.21	10.17	7.5	6.58	6.63	5.14	4	4.39	4.53	3.65	4.04	7.7	6.72													YOL024W	>0.9999	YLR021W	0.9997	YPL047W	>0.9999	YPL163C	>0.9999
YDR035W	9.75	10.06	10.6	10.55	10.22	10.2	10.88	10.52	9.84	9.66	10.06	10.16	10.34	10.42	10.24	9.89													YLR451W	>0.9999	YLR029C	>0.9999	YBL020W	>0.9999	YJR010W	>0.9999
YDR036C	7.73	7.92	8.2	8.05	7.81	7.67	7.89	8.05	7.79	8.04	7.96	7.89	7.96	7.86	7.96	7.93													YOR040W	>0.9999	YOR267C	0.333	YOL075C	>0.9999	YGR233C	0.9993
YDR037W	11.71	11.76	11.73	11.68	11.52	11.58	11.54	11.41	11.54	11.59	11.21	11.2	11.57	11.53	11.25	11.19													YGR221C	>0.9999	YDR200C	>0.9999	YBL026W	0.8579	YHR117W	>0.9999
YDR038C	9.16	9.51	9.39	9.32	9.01	8.92	9.2	9.11	9.25	9.18	9.01	9.01	9.03	9.04	9.19	9.16													YLR096W	>0.9999	YKL135C	0.9952	YLR352W	>0.9999	YBR278W	>0.9999
YDR038C	6.86	7.28	6.93	6.93	6.53	6.72	6.79	6.77	7	7.1	6.87	6.94	6.8	6.67	6.69	6.69													YGL110C	>0.9999	YFL056C	>0.9999	YJR032W	0.5566	YBR089C-A	>0.9999
YDR041W	8.46	9.11	8.44	8.67	8.91	8.99	8.62	8.66	8.65	8.85	9.01	9	8.99	9.05	8.65	8.67													YMR192W	>0.9999	YJL205C	>0.9999	YOR051C	>0.9999	YLR348C	>0.9999
YDR042C	4.11	4.29	4.51	4.17	5.06	4.22	4.6	4.35	3.74	4.71	4.56	4.5	4.5	4.35	4.45	4.56													YDL192W	>0.9999	YKL054C	>0.9999	YDR050C	>0.9999	YOR167C	>0.9999
YDR043C	6.35	6.55	6.49	6.98	7.26	7.05	7.61	7.59	7.48	6.37	7.32	7.27	7.17	7.68	7.97	7.97													YLR197W	>0.9999	YMR308C	0.9885	YBR248C	>0.9999	YOR259C	>0.9999
YDR044W	8.2	7.76	8.05	7.89	8.72	8.73	7.98	8.17	9.2	8.27	7.94	7.97	8.61	9.04	8.32	8.3													YIL033C	>0.9999	YBR153W	0.999	YPR179C	0.1381	YMR080C	>0.9999
YDR045C	8.66	8.61	8.67	8.63	8.4	8.65	8.41	8.5	8.25	8.71	8.99	9.03	8.47	8.49	8.38	8.42													YPL150W	>0.9999	YLR393W	0.333	YKR055W	>0.9999	YLR054C	0.9392
YDR046C	8.99	9.32	9.36	9.56	7.92	8.65	9.39	9.17	8.67	9.11	9.09	9.13	8.41	8.42	8.85	8.39													YPL269W	>0.9999	YGL028C	0.1501	YPL121C	0.2737	YER068W	>0.9999
YDR047W	8.21	8.48	8.39	8.31	8.5	8.6	8.51	8.43	8.28	8.44	8.33	8.34	8.47	8.53	8.45	8.34													YNL161W	>0.9999	YML097C	>0.9999	YPR122W	>0.9999	YJL136W-A	>0.9999
YDR049W	7.11	6.76	6.83	6.56	6.73	6.45	6.45	6.28	6.57	7.17	6.66	6.79	7.11	6.95	6.31	6.35													YLR137W	>0.9999	YER025W	>0.9999	YBL072C	0.0722	YNL159C	>0.9999
YDR050C	12.96	13.05	13.02	13.03	13.07	13.09	13.07	13.07	13	12.92	13	13.05	12.9	12.94	13.07	13.1													YNR013C	>0.9999	YGL010W	0.9971	YLR455W	>0.9999	YNL153C	>0.9999
YDR051C	8.24	8.13	8.45	8.35	8.51	8.42	8.55	8.51	8.1	8.19	8.53	8.58	8.54	8.58	8.48	8.5													YOR008C	>0.9999	YPL103C	>0.9999	YDL093W	>0.9999	YGR207C	>0.9999
YDR052C	7.74	7.62	7.75	7.49	7.72	7.46	7.69	7.79	7.08	7.75	7.51	7.46	7.67	7.55	7.69	7.81													YLR372W	>0.9999	YFR049W	0.9405	YAL009W	>0.9999	YMR295C	>0.9999
YDR054C	9.32	9.52	8.96	8.98	9.46	9.49	8.87	8.91	9.43	9.32	8.98	8.98	9.35	9.48	8.88	8.84													YBR236C	>0.9999	YCR028C	>0.9999	YJR016C	>0.9999	YDL154W	>0.9999
YDR055W	9.54	10.03	9.35	9.46	9.9	9.81	10	9.81	10.24	10.01	9.44	9.36	9.82	10.09	10.08	9.92													YCR036W	>0.9999	YCR061W	0.0855	YCR020C-A	>0.9999	YML087C	>0.9999
YDR056C	8.62	8.83	8.56	8.85	8.25	8.57	8.61	8.68	8.72	8.5	9.24	9.23	8.31	8.52	8.66	8.58													YGL026C	>0.9999	YJL023C	>0.9999	YPL084W	>0.9999	YPL260W	>0.9999
YDR057W	5.93	5.71	5.85	5.89	5.89	5.9	5.75	5.79	6.22	5.94	5.89	5.91	6.2	5.92	5.62	5.49													YNL097C	>0.9999	YPR098C	0.9831	YDL132W	>0.9999	YCL005W-A	>0.9999
YDR058C	6.52	6.76	6.44	6.68	6.94	6.83	6.9	6.87	6.96	6.54	6.84	6.95	6.52	6.73	7.01	6.86													YOR319W	>0.9999	YDR202C	>0.9999	YGR040W	>0.9999	YDL044C	>0.9999
YDR059C	7.79	8.22	8.11	8.12	7.86	7.91	8.56	8.43	8.38	7.84	8.19	8.19	7.61	7.76	8.43	8.39													YKL174C	>0.9999	YLR154C	>0.9999	YDR205W	>0.9999	YDR014W	>0.9999
YDR060W	10.93	10.44	10.46	10.12	10.31	10.32	9.63	9.57	10.03	10.9	9.91	9.81	10.59	10.44	9.41	9.44													YAR068W	>0.9999	YPL088W	>0.9999	YDL082W	>0.9999	YJR125C	>0.9999
YDR061W	7.06	7.08	7	7.28	7.44	7.24	7.34	7.37	7.01	7.07	7.23	7.34	7.22	7.36	7.45	7.32													YDR146C	>0.9999	YBR092C	0.7943	YGL027C	>0.9999	YDR302W	>0.9999
YDR062W	10.28	10.46	10.21	10.34	10.28	10.38	10.16	10.15	10.43	9.88	9.93	9.88	10.12	10.16	10.15	10.1													YDL072C	>0.9999	YKR018C	0.8801	YBR272C	>0.9999	YBR176W	>0.9999
YDR063W	8.95	9.49	8.95	9.02	9.58	9.58	9.35	9.28	9.71	8.94	9.06	8.87	9.21	9.39	9.41	9.35													YOL149W	>0.9999	YER106W	>0.9999	YOR197W	>0.9999	YOR339C	>0.9999
YDR064W	12.58	12.65	12.73	12.73	12.44	12.41	12.69	12.73	12.35	12.68	12.77	12.75	12.68	12.67	12.72	12.66													YBL067C	>0.9999	YBR060C	>0.9999	YBR029C	>0.9999	YPL214C	>0.9999
YDR065W	5.47	5.69	5.6	5.39	5.01	5.31	5.43	5.46	4.97	5.54	5.67	5.67	5.54	5.41	5.46	5.52													YDR351W	>0.9999	YBR194W	>0.9999	YPR023C	>0.9999	YGR044C	>0.9999
YDR066C	6.2	6.39	5.97	6.25	6.02	5.81	5.88	5.79	6.14	6.27	6.28	6.49	6.08	6	5.79	5.89													YGR226C	>0.9999	YJR047C	>0.9999	YPL163C	>0.9999	YLR238W	>0.9999
YDR067C	7.66	7.67	7.74	7.8	7.78	8.01	7.93	7.91	7.85	7.79	7.85	7.81	7.94	8.05	7.9	7.81													YKL222C	>0.9999	YPL091W	>0.9999	YJR010W	>0.9999	YDL045W-A	>0.9999
YDR068W	8.29	8.01	8.25	8.24	8.33	8.33	8.24	8.2	8.61	8.14	8.26	8.27	8.5	8.53	8.3	8.35													YKL073W	>0.9999	YOR214C	>0.9999	YGR233C	0.2273	YGR090W	>0.9999
YDR069C	7.3	7.76	7.29	7.29	7.76	7.36	7.56	7.65	7	7.47	7.3	7.19	7.92	7.85	7.57	7.66													YDL131W	>0.9999	YCL047C	0.9819	YHR117W	>0.9999	YJL191W	0.8939
YDR070C	5.73	6.83	5.12	5.8	7.09	6.62	6.35	6.16	7.61	5.82	5.63	5.5	5.5	6.33	6.72	6.19													YNL204C	>0.9999	YJR031C	>0.9999	YBR278W	>0.9999	YMR133W	>0.9999
YDR071C	9.83	9.67	9.67	9.75	9.65	9.81	9.58	9.69	9.84	9.73	10.04	10.03	9.1	9.23	9.58	9.7													YDL061C	>0.9999	YDR362C	>0.9999	YBR089C-A	>0.9999	YNL254C	>0.9999
YDR072C	7.92	7.98	8.53	8.19	8.36	8.2	8.74	8.56	7.8	8.19	8.25	8.18	8.42	8.44	8.55	8.88													YML082W	>0.9999	YPL047W	>0.9999	YLR348C	>0.9999	YIL116W	>0.9999
YDR073W	7.7	7.78	7.97	7.9	8.16	8.02	8.32	8.32	7.88	7.75	7.95	7.92	7.96	8.23	8.37	8.44													YJL063C	>0.9999	YBL020W	>0.9999	YOR167C	>0.9999	YBL005W	>0.9999
YDR074W	7.7	8.71	8.14	8.72	9.03	8.8	9.18	9.04	8.55	7.74	8.34	8.19	8.22	8.83	8.92	8.85													YGL184C	>0.9999	YOL075C	0.999	YOR259C	>0.9999	YBR022W	>0.9999
YDR075W	7.31	7.66	7.64	7.07	7.33	7.48	7.08	6.99	7.67	7.44	7.77	7.85	7.01	7.4	7.1	7.19													YGR077C	>0.9999	YBL026W	0.9997	YMR080C	>0.9999	YIL131C	>0.9999
YDR076W	6.48	6.28	6.17	5.89	6.55	6.32	5.73	5.89	6.76	6.85	6.02	6.23	7.12	7.07	5.91	5.86													YLR278C	>0.9999	YLR352W	>0.9999	YLR054C	>0.9999	YBR171W	>0.9999
YDR077W	12.83	12.88	12.42	12.58	13.08	12.97	12.9	12.86	13.17	12.92	12.41	12.24	12.86	12.89	12.94	12.9													YPL234C	>0.9999	YJR032W	0.9938	YER068W	>0.9999	YOR204W	>0.9999
YDR078C	6.08	6.26	6.51	6.43	6.55	6.23	6.44	6.45	6.55	6.21	6.41	6.69	6.47	6.58	6.46	6.5													YIR032C	>0.9999	YOR051C	>0.9999	YNL159C	>0.9999	YDR143C	>0.9999
YDR079C-A	7.25	7.48	7.15	7.19	7.51	7.48	7.28	7.23	8.25	7.6	7.7	7.82	7.5	7.72	7.47	7.23													YJL140W	>0.9999	YDR050C	>0.9999	YNL153C	>0.9999	YOL067C	>0.9999
YDR079W	7.95	8.47	7.44	7.83	8.62	8.79	7.98	7.63	8.58	8.43	8.02	7.87	8.48	8.87	7.81	7.81													YEL072W	>0.9999	YBR248C	0.7968	YGR207C	>0.9999	YBR083W	>0.9999
YDR080W	7.24	7.27	7.1	7.08	7.16	7.13	7.09	6.88	7.36	7.04	6.92	7.04	7.19	7.16	6.97	6.99													YGR198W	>0.9999	YPR179C	0.9994	YHL040C	>0.9999	YML129C	>0.9999
YDR081C	8.42	8.03	8.58	8.48	8.35	8.36	8.23	8.17	8.06	8.48	8.28	8.41	8.22	8.49	8.13	8.07													YJL143W	0.4799	YKR055W	>0.9999	YMR295C	>0.9999	YKL088W	>0.9999
YDR082W	6.12	6.38	5.87	5.89	6.06	6.08	5.86	5.74	6.03	6.11	6.04	6.18	6.43	6.2	5.81	5.77													YNL221C	>0.9999	YPL121C	>0.9999	YDL154W	>0.9999	YOR075W	>0.9999
YDR083W	9.03	8.47	8.78	8.4	7.98	8.51	7.69	7.81	8.33	9.06	8.25	8.34	8.27	8.13	7.68	7.51													YIL102C	>0.9999	YPR122W	>0.9999	YPL260W	>0.9999	YOL123W	>0.9999
YDR084C	8.22	8.7	8.5	8.67	8.43	8.56	8.8	8.85	8.52	8.29	8.84	8.82	8.45	8.4	8.82	8.83													YOR264W	>0.9999	YBL072C	>0.9999	YKR034W	>0.9999	YNL045W	>0.9999
YDR085C	5.26	5.69	5.61	5.74	5.99	5.06	6.31	6.04	6.65	5.39	5.78	5.79	5.78	5.71	6.13	6.23													YIL118W	>0.9999	YLR455W	0.9136	YCL005W-A	>0.9999	YGR088W	0.4195
YDR086C	10.75	10.87	10.69	10.68	10.9	10.93	10.76	10.77	10.78	10.78	10.84	10.77	10.99	10.84	10.72	10.72													YMR238W	>0.9999	YDL093W	>0.9999	YDL044C	>0.9999	YBL099W	>0.9999
YDR087C	9.54	9.58	9.29	8.77	8.55	8.92	8.03	8.08	8.85	9.62	8.94	9.03	8.77	8.66	7.89	7.86													YPL067C	>0.9999	YAL009W	>0.9999	YDR014W	>0.9999	YDR191W	>0.9999
YDR088C	7.13	6.81	7.03	6.9	7.16	6.78	6.75	6.84	6.69	7.34	7.02	7.17	7.24	7.14	6.77	6.91													YJL014W	>0.9999	YJR016C	0.9998	YJR125C	>0.9999	YIL052C	>0.9999
YDR089W	7.81	7.95	8.65	8.55	8.41	8.34	8.91	9.01	7.67	7.83	8.48	8.44	8.82	8.74	8.9	8.93													YIL092W	>0.9999	YCR020C-A	0.9909	YDR302W	>0.9999	YMR244W	>0.9999
YDR090C	7.56	7.74	7.69	7.8	7.38	7.23	7.73	7.85	8.42	7.6	7.77	7.87	7.46	7.41	7.85	7.89													YHR002W	>0.9999	YPL084W	>0.9999	YBR176W	>0.9999	YER078W-A	>0.9999
YDR091C	9.38	8.98	9.83	9.56	8.94	9.14	9.28	9.32	8.55	9.29	9.18	9.08	8.89	8.94	9.18	9.22													YNL167C	>0.9999	YOR107W	>0.9999	YOR339C	0.4853	YPR061C	>0.9999
YDR092W	9.39	9.35	9.58	9.55	9.93	9.96	9.92	9.89	10	9.37	9.53	9.36	9.46	9.62	9.98	9.86													YDL070W	>0.9999	YDL132W	>0.9999	YPL214C	>0.9999	YNR038W	>0.9999
YDR093W	8.61	9.15	8.76	8.6	8.9	8.66	8.64	8.66	8.37	8.73	8.44	8.35	9.16	9.04	8.6	8.59													YLR211C	>0.9999	YGR040W	>0.9999	YGR044C	>0.9999	YDR506C	>0.9999
YDR096W	7.14	7.75	7.25	7.85	7.99	7.63	7.99	7.91	7.68	7.5	7.86	7.73	7.69	8.06	7.91	8.05													YLR192C	>0.9999	YDR205W	0.9753	YLR238W	>0.9999	YLR443W	>0.9999
YDR097C	8.45	8.37	8.12	8.12	8.33	8.4	7.94	7.91	8.29	8.58	8.05	8.06	8.37	8.28	7.88	8.07													YMR290C	>0.9999	YDL082W	>0.9999	YDL045W-A	>0.9999	YPL117C	>0.9999
YDR098C	9.56	9.77	9.27	9.47	9.41	9.61	9.28	9.36	9.69	9.52	9.57	9.58	9.21	9.23	9.31	9.36													YDR492W	>0.9999	YGL027C	>0.9999	YGR090W	>0.9999	YGR192C	>0.9999
YDR099W	10.7	10.23	10.62	10.85	10.78	10.7	10.83	10.75	10.81	10.53	10.49	10.42	10.2	10.33	10.78	10.71													YDR197W	0.1522	YBR272C	0.9994	YNL254C	0.9994	YPR107C	>0.9999
YDR100W	8.2	8.52	8.52	8.81	8.7	8.76	8.99	8.98	9.01	8.19	9	8.98	8.05	8.37	8.98	8.98													YJL071W	>0.9999	YOR197W	>0.9999	YIL116W	>0.9999	YNL009W	>0.9999
YDR101C	8.9	8.91	9.35	8.73	7.75	8.38	8.15	8.04	8.1	9.08	8.81	8.86	8.18	8.12	7.93	7.77													YKL094W	>0.9999	YBR029C	>0.9999	YBL005W	>0.9999	YPL075W	>0.9999
YDR103W	5.74	6.4	5.57	5.32	6.04	5.71	5.59	5.46	5.52	6	5.5	5.59	6.27	6.07	5.51	5.63													YBR211C	>0.9999	YPR023C	>0.9999	YBR022W	>0.9999	YDR198C	>0.9999
YDR104C	6.55	6.73	6.62	6.54	6.63	6.19	6.7	6.65	6.46	6.65	6.35	6.27	6.72	6.46	6.6	6.52													YDR232W	>0.9999	YPL163C	>0.9999	YIL131C	>0.9999	YNL071W	>0.9999
YDR105C	7.96	8.34	8.27	8.44	8.5	8.34	8.65	8.59	8.41	7.92	8.26	8.28	8.33	8.43	8.69	8.73													YGL190C	>0.9999	YJR010W	>0.9999	YBR171W	0.9048	YGR124W	>0.9999
YDR106W	3.98	4.37	3.88	4.35	4.7	4.41	4.35	4.21	3.89	4.18	4.36	4.34	4.25	4.45	4.31	4.37													YKL184W	>0.9999	YGR233C	>0.9999	YOR204W	>0.9999	YDR078C	>0.9999
YDR107C	6.9	7.08	7.67	7.66	7.59	7.43	7.85	8.02	7.66	6.9	7.38	6.96	7.65	7.44	7.96	7.96													YHR101C	>0.9999	YHR117W	>0.9999	YDR143C	>0.9999	YLR040C	>0.9999
YDR108W	6.83	6.85	6.79	6.91	6.54	6.74	6.94	6.71	6.97	6.72	6.76	6.79	6.73	6.76	6.73	6.77													YLR421C	>0.9999	YBR278W	>0.9999	YBR083W	>0.9999	YOR354C	>0.9999
YDR109C	6.6	6.53	6.59	6.5	6.49	6.52	6.46	6.48	6.76	6.36	6.14	6.01	6.48	6.34	6.47	6.42													YDR076W	>0.9999	YBR089C-A	>0.9999	YML129C	>0.9999	YJR005C-A	>0.9999
YDR110W	7.46	6.86	7.36	7.11	6.88	7.16	6.94	6.94	7.22	7.12	7.02	7.11	6.97	6.8	6.84	6.77													YGR180C	>0.9999	YLR348C	>0.9999	YKL088W	>0.9999	YJR051W	>0.9999
YDR111C	7.09	7.45	7.41	7.27	7.27	7.25	7.37	7.13	6.38	7.08	7.17	7.25	7.03	7.23	7.07	7.21													YOR175C	>0.9999	YOR167C	>0.9999	YOR075W	>0.9999	YHR074W	>0.9999
YDR113C	7.64	7.21	7.29	7.52	7.66	7.55	7.54	7.64	7.38	7.42	7.22	7.21	7.37	7.37	7.77	7.71													YOR130C	>0.9999	YOR259C	>0.9999	YOL123W	>0.9999	YJL204C	>0.9999
YDR115W	7.92	7.98	7.87	8.01	8.24	8.47	8.33	8.16	8.48	7.95	8.14	8.15	7.98	8.07	8.16	8.11													YNL223W	>0.9999	YMR080C	0.9959	YNL045W	>0.9999	YBL091C	>0.9999
YDR116C	7.42	7.56	7.72	7.78	7.84	7.78	8.09	8	7.46	7.59	7.91	7.91	7.44	7.71	7.95	8.04													YAL044C	>0.9999	YLR054C	>0.9999	YGR088W	0.1005	YPL181W	>0.9999
YDR117C	8.76	8.76	8.56	8.63	8.95	8.88	8.51	8.62	8.72	8.71	8.41	8.41	8.92	8.75	8.54	8.56													YOL109W	>0.9999	YER068W	>0.9999	YBL099W	>0.9999	YOL072W	>0.9999
YDR118W	5.95	6.32	6.16	6.35	6.65	6.42	6.49	6.42	6.66	6.06	6.12	6.2	6.66	6.69	6.53	6.57													YIR031C	>0.9999	YNL159C	>0.9999	YDR191W	>0.9999	YER136W	>0.9999
YDR119W	8.86	8.89	9.33	9.2	8.86	9	9.19	9.12	9.06	8.64	8.81	8.74	8.85	8.73	8.98	8.99													YMR123W	>0.9999	YNL153C	>0.9999	YIL052C	>0.9999	YER101C	>0.9999
YDR120C	9.9	9.35	9.63	9.21	9.07	9.14	8.6	8.63	9.09	9.79	9.21	9.28	9.13	9.1	8.38	8.37													YGL205W	>0.9999	YGR207C	>0.9999	YMR244W	>0.9999	YHR177W	>0.9999
YDR121W	8.25	8.21	7.89	7.9	7.75	8.08	7.52	7.64	7.72	8.3	8.18	8.29	7.9	7.97	7.55	7.58													YFL055W	>0.9999	YHL040C	0.0592	YER078W-A	0.0645	YNR055C	>0.9999
YDR122W	8.03	8.63	7.53	8.12	8.68	8.32	8.01	8.05	8.37	8.32	8	7.84	8.36	8.48	8.17	7.95													YJR119C	>0.9999	YMR295C	>0.9999	YPR061C	>0.9999	YNL321W	>0.9999
YDR123C	7.19	6.1	6.87	6.85	6.91	6.8	6.57	6.48	6.91	6.58	6.62	6.71	6.24	6.49	6.6	6.73													YDL069C	>0.9999	YDL154W	>0.9999	YNR038W	>0.9999	YOR289W	>0.9999
YDR124W	4.66	4.72	4.45	4.62	4.89	3.99	4.49	4.56	4.6	4.21	4.54	4.56	4.45	4.56	4.64	4.54													YOR097C	>0.9999	YPL260W	0.8498	YDR506C	>0.9999	YOL024W	>0.9999
YDR125C	5.37	5.27	4.91	5.13	5.54	4.93	5.16	5.29	5	4.8	4.77	4.82	5.19	4.89	5.05	4.66													YNL152W	>0.9999	YKR034W	>0.9999	YLR443W	>0.9999	YLR451W	>0.9999
YDR126W	5.94	6.05	6.13	6.03	6.24	6.14	6.1	6.12	6.43	5.85	5.87	5.9	5.91	6	6.35	6.21													YNL212W	>0.9999	YCL005W-A	>0.9999	YPL117C	>0.9999	YOR040W	>0.9999
YDR127W	11.11	11.45	11.27	11.2	11.62	11.33	11.41	11.1	11.19	11.41	10.49	10.42	11.72	11.66	11.12	10.94													YER123W	>0.9999	YDL044C	>0.9999	YGR192C	>0.9999	YGR221C	>0.9999
YDR128W	8.22	8.68	7.38	7.8	8.1	7.83	7.6	7.47	8.56	8.42	7.65	7.56	8.14	8.13	7.67	7.54													YPL167C	>0.9999	YDR014W	>0.9999	YPR107C	>0.9999	YLR096W	>0.9999
YDR129C	9.6	9.93	9.72	9.95	9.66	9.7	9.79	9.72	9.73	9.6	9.72	9.56	9.35	9.59	9.79	9.71													YCR098C	>0.9999	YJR125C	>0.9999	YNL009W	>0.9999	YGL110C	>0.9999
YDR130C	6.13	6.04	5.81	6.25	5.78	6.37	6.09	6.2	5.92	5.95	6.31	6.34	6.12	6.24	6.2	6.17													YIR030C	>0.9999	YDR302W	>0.9999	YPL075W	>0.9999	YMR192W	>0.9999
YDR131C	6.55	6.5	6.23	6.44	6.58	6.72	6.62	6.48	6.9	6.58	6.41	6.34	6.82	6.74	6.56	6.47													YCR081W	>0.9999	YBR176W	>0.9999	YDR198C	>0.9999	YDL192W	>0.9999
YDR132C	6.69	6.63	6.78	6.51	6.96	6.66	6.68	6.66	6.93	6.69	6.52	6.53	6.24	6.3	6.79	6.84													YKR057W	>0.9999	YOR339C	>0.9999	YNL071W	>0.9999	YLR197W	>0.9999
YDR135C	9.33	9.8	9.35	9.33	9.49	9.3	9.34	9.27	9.48	9.37	9.14	8.94	9.54	9.4	9.23	9.26													YCR082W	>0.9999	YPL214C	>0.9999	YGR124W	>0.9999	YIL033C	>0.9999
YDR137W	7.83	7.65	7.92	7.94	7.66	7.7	8.05	8.05	7.81	7.68	7.91	7.82	7.84	7.69	8.05	8.06													YDR288W	>0.9999	YGR044C	0.9974	YDR078C	>0.9999	YPL150W	>0.9999
YDR138W	6.35	6.35	6.46	6.36	6.18	6.12	6.27	6.36	5.79	6.38	6.22	5.85	6.54	6.44	6.16	6.14													YMR063W	>0.9999	YLR238W	>0.9999	YLR040C	0.7013	YPL269W	>0.9999
YDR139C	8.57	8.38	7.92	8.2	8.71	9.08	8.2	8.19	9.2	8.78	8.36	8.5	8.57	8.58	8.23	7.95													YKL068W	>0.9999	YDL045W-A	>0.9999	YOR354C	>0.9999	YNL161W	>0.9999
YDR140W	7.47	7.38	7.68	7.55	7.11	7.37	7.56	7.5	7.87	7.31	7.64	7.7	7.53	7.3	7.6	7.43													YDR221W	>0.9999	YGR090W	0.4737	YJR005C-A	0.2273	YLR137W	>0.9999
YDR141C	8.71	9	8.6	8.54	8.66	8.4	8.48	8.64	8.43	8.71	8.29	8.2	8.89	8.71	8.5	8.56													YDR378C	>0.9999	YJL191W	0.0997	YJR051W	>0.9999	YNR013C	>0.9999
YDR142C	6.97	7.24	7.29	7.24	7.14	7.09	7.36	7.37	7.25	7.09	7.29	7.39	7.13	7.12	7.4	7.3													YIL015W	>0.9999	YNL254C	>0.9999	YHR074W	>0.9999	YOR008C	>0.9999
YDR143C	8.23	8.17	8.43	8.05	8.25	7.77	7.99	8.02	7.59	8.33	7.7	7.64	8.12	8.08	8	8.01													YBL018C	>0.9999	YIL116W	>0.9999	YJL204C	>0.9999	YLR372W	>0.9999
YDR144C	8	8.27	7.85	8.23	7.7	7.8	7.84	7.39	8.13	8.19	7.71	7.73	7.52	7.79	7.67	7.41													YLR395C	>0.9999	YBL005W	0.5059	YBL091C	>0.9999	YBR236C	>0.9999
YDR145W	8.65	8.45	8.52	8.56	8.77	8.57	8.33	8.44	8.49	8.67	8.48	8.55	8.64	8.62	8.28	8.22													YKL012W	>0.9999	YBR022W	0.9819	YPL181W	>0.9999	YCR036W	>0.9999
YDR146C	7.78	8.14	7.67	7.83	8.11	7.85	7.61	7.81	6.99	8.15	8.28	8.5	8.86	9.02	7.82	7.99													YGL195W	>0.9999	YIL131C	>0.9999	YOL072W	>0.9999	YGL026C	>0.9999
YDR147W	6.96	6.87	6.85	6.85	6.66	6.6	6.68	6.81	7.11	6.87	6.99	7.14	7.05	7.14	6.92	6.94													YGR006W	>0.9999	YBR171W	>0.9999	YER136W	0.5206	YNL097C	>0.9999
YDR148C	9.34	9.88	9.44	9.65	9.29	9.31	9.57	9.67	9.42	9.45	9.64	9.61	9.17	9.49	9.63	9.66													YBR238C	>0.9999	YDR143C	0.4737	YER101C	>0.9999	YOR319W	>0.9999
YDR150W	9.72	10.56	9.23	9.42	9.62	9.32	9.18	8.99	9.74	10.33	9.18	9.12	10.37	10.03	9.16	9.02													YHR132W-A	>0.9999	YOL067C	>0.9999	YNR055C	>0.9999	YKL174C	>0.9999
YDR151C	7.73	7.56	7.42	7.6	7.62	7.67	7.61	7.65	7.55	7.58	7.95	8.01	7.34	7.73	7.67	7.74													YER111C	>0.9999	YBR083W	0.1627	YNL321W	>0.9999	YAR068W	>0.9999
YDR152W	9.16	9.01	8.92	8.74	8.67	8.89	8.49	8.44	8.69	9.17	8.95	8.98	9.25	8.88	8.34	8.36													YDR194W-A	>0.9999	YHR022C	>0.9999	YOR289W	>0.9999	YDR146C	>0.9999
YDR153C	8.84	8.68	8.8	8.66	8.89	8.87	8.71	8.58	8.66	8.88	8.56	8.57	9.04	9.08	8.62	8.62													YLR462W	0.9992	YML129C	0.9959	YAL062W	>0.9999	YDL072C	>0.9999
YDR155C	12.65	12.72	12.4	12.53	12.63	12.62	12.49	12.5	12.83	12.75	12.64	12.59	12.58	12.65	12.54	12.54													YCR101C	>0.9999	YKL088W	>0.9999	YLR451W	>0.9999	YOL149W	>0.9999
YDR156W	9.31	9.57	9.35	9.1	8.85	9.06	8.91	8.92	8.82	9.62	9.26	9.22	9.17	8.97	8.81	8.73													YPL138C	>0.9999	YOR075W	>0.9999	YOR040W	>0.9999	YBL067C	>0.9999
YDR158W	11.31	11.63	11.97	11.97	11.36	11.45	12.13	11.89	11.09	11.22	11.73	11.78	11.32	11.41	11.74	11.49													YPL145C	>0.9999	YOL123W	>0.9999	YGR221C	>0.9999	YDR351W	>0.9999
YDR159W	8.22	7.83	8.05	7.93	8.29	7.92	7.95	7.91	8.03	8.08	7.66	7.56	8.22	7.99	7.93	7.89													YDR281C	>0.9999	YNL045W	>0.9999	YLR096W	>0.9999	YGR226C	>0.9999
YDR160W	6.02	6.34	5.67	5.84	6.41	6.19	5.89	5.82	5.81	6.23	5.58	5.57	6.27	6.31	5.88	5.94													YJR015W	>0.9999	YGR088W	>0.9999	YGL110C	0.1873	YKL222C	>0.9999
YDR161W	9.13	9.07	8.92	8.58	8.23	8.7	8.16	8.07	8.62	9.05	8.56	8.71	8.56	8.38	7.96	7.94													YIL039W	>0.9999	YBL099W	>0.9999	YDL192W	>0.9999	YKL073W	>0.9999
YDR162C	6.67	6.41	6.53	6.7	6.39	6.59	6.5	6.52	6.61	6.59	6.71	6.77	6.5	6.42	6.45	6.45													YOL155C	>0.9999	YDR191W	>0.9999	YLR197W	>0.9999	YDL131W	>0.9999
YDR163W	7.99	7.82	7.62	7.68	7.9	8.01	7.53	7.56	7.97	8.05	7.73	7.73	7.95	7.89	7.53	7.59													YHL029C	>0.9999	YIL052C	>0.9999	YIL033C	>0.9999	YNL204C	>0.9999
YDR164C	8.09	7.66	7.76	7.71	7.91	7.98	7.6	7.56	8.28	7.71	7.37	7.42	7.53	7.5	7.57	7.59													YJR093C	>0.9999	YMR244W	0.9302	YPL150W	>0.9999	YDL061C	>0.9999
YDR165W	9.47	9.06	9.44	9.01	8.24	8.77	8.48	8.57	8.47	9.27	9.06	9.08	8.64	8.21	8.31	8.21													YJR112W	>0.9999	YER078W-A	>0.9999	YPL269W	>0.9999	YML082W	>0.9999
YDR166C	8.3	8.76	8.32	8.19	8.13	8.02	8.2	8.31	7.79	8.53	8.11	8.06	8.55	8.28	8.17	8.2													YLR394W	>0.9999	YPR061C	>0.9999	YNL161W	>0.9999	YJL063C	>0.9999
YDR167W	8.57	8.2	8.33	8.31	8.53	8.7	8.3	8.2	8.48	8.45	8.46	8.56	8.62	8.6	8.23	8.2													YNL012W	>0.9999	YNR038W	0.6058	YLR137W	>0.9999	YGR077C	>0.9999
YDR168W	9.91	9.95	9.7	9.72	9.9	9.93	9.66	9.72	10.06	9.76	9.75	9.74	10.01	9.96	9.82	9.75													YDR099W	>0.9999	YDR506C	>0.9999	YNR013C	>0.9999	YLR278C	>0.9999
YDR169C	8.15	8.07	7.54	7.78	8.48	8.31	7.88	7.82	8.16	7.88	7.25	7.28	7.94	7.94	8.05	7.86													YGL166W	>0.9999	YLR443W	>0.9999	YLR372W	>0.9999	YPL234C	>0.9999
YDR169C-A	2.78	2.45	2.82	3.01	3.27	2.72	2.65	2.72	2.56	2.39	2.57	2.69	2.79	2.57	2.27	2.26													YGL238W	>0.9999	YPL117C	>0.9999	YBR236C	>0.9999	YJL140W	>0.9999
YDR170C	9.92	9.87	10.01	9.89	9.81	9.62	9.87	9.76	9.72	9.8	9.6	9.48	9.95	9.78	9.78	9.78													YIL149C	>0.9999	YGR192C	>0.9999	YCR036W	>0.9999	YEL072W	>0.9999
YDR171W	7.75	8.4	6.87	8.23	8.88	8.64	8.68	8.51	8.98	7.55	8.28	8.31	7.36	8.72	8.83	8.94													YLR042C	>0.9999	YPR107C	0.9998	YGL026C	>0.9999	YGR198W	>0.9999
YDR172W	10.29	10.05	10.18	10.1	9.92	9.99	9.94	9.9	9.86	10.28	9.89	9.74	9.83	9.87	9.73	9.76													YPL160W	>0.9999	YNL009W	>0.9999	YNL097C	>0.9999	YJL143W	>0.9999
YDR173C	5.53	5.96	6.04	6.01	5.96	5.68	6.14	6.09	5.62	5.9	6.49	6.38	5.99	6.35	6.29	6.35													YFL046W	>0.9999	YPL075W	>0.9999	YOR319W	>0.9999	YNL221C	>0.9999
YDR174W	10.75	10.62	10.61	10.73	10.83	10.8	10.54	10.59	10.62	10.83	10.82	10.79	10.79	10.92	10.69	10.57													YLL046C	>0.9999	YDR198C	>0.9999	YKL174C	>0.9999	YIL102C	>0.9999
YDR175C	7.95	7.84	8	8.01	8.18	8.15	7.97	7.85	7.82	7.94	8.12	8.09	7.86	7.96	7.83	7.92													YLR289W	>0.9999	YNL071W	>0.9999	YAR068W	>0.9999	YOR264W	>0.9999
YDR176W	8.71	8.21	8.31	8.36	8.78	8.57	8.22	8.22	8.66	8.54	8.14	8.17	8.86	8.59	8.15	8.18													YNL079C	>0.9999	YGR124W	0.9998	YJR152W	>0.9999	YIL118W	>0.9999
YDR177W	10.34	10.29	9.85	10.04	10.37	10.3	9.83	9.77	10.68	10.25	10.11	10.13	9.92	10.27	9.86	9.78													YEL050C	>0.9999	YDR078C	>0.9999	YBL067C	>0.9999	YMR238W	>0.9999
YDR178W	9.06	8.6	9.68	9.14	10.5	10.53	9.92	11.03	9.82	8.77	8.79	8.9	8.22	8.44	9.6	10.18													YDR497C	>0.9999	YLR040C	>0.9999	YDR351W	0.0645	YPL067C	>0.9999
YDR179C	6.75	6.34	6.42	6.16	6.35	6.64	5.9	6.07	6.62	6.9	6.72	6.8	7.2	7.02	6	6.12													YBR079C	>0.9999	YOR354C	>0.9999	YKL222C	>0.9999	YJL014W	>0.9999
YDR179W-A	6.69	6.59	6.9	6.72	6.16	6.3	6.55	6.52	6.5	6.62	6.73	6.73	6.76	6.45	6.55	6.57													YOL114C	>0.9999	YJR005C-A	>0.9999	YKL073W	>0.9999	YIL092W	>0.9999
YDR180W	7.01	7.11	7.38	7.03	6.95	6.67	6.98	7.07	6.52	7.28	6.84	6.95	7.2	7.04	7.03	6.85													YNR035C	0.264	YJR051W	>0.9999	YDL131W	>0.9999	YHR002W	>0.9999
YDR181C	7.27	6.97	6.95	7.07	7.21	7.11	6.92	6.98	6.83	7.25	7.15	7.14	7.14	7.18	6.89	6.91													YHR050W	>0.9999	YHR074W	>0.9999	YDL061C	>0.9999	YNL167C	>0.9999
YDR182W	8.47	8.35	8.37	8.64	8.62	8.49	8.68	8.66	8.55	8.38	8.5	8.51	8.25	8.53	8.7	8.63													YIL097W	>0.9999	YJL204C	>0.9999	YML082W	>0.9999	YDL070W	>0.9999
YDR182W-A	4.76	5.14	5.08	4.93	4.78	4.31	5.05	5.08	4.58	5.32	5.04	5.09	5.33	5.27	4.83	4.99													YKL003C	>0.9999	YBL091C	>0.9999	YJL063C	>0.9999	YLR211C	>0.9999
YDR183W	7.55	7.46	7.28	7.34	7.38	7.59	7.29	7.23	7.54	7.56	7.67	7.76	7.25	7.32	7.32	7.32													YOR362C	>0.9999	YPL181W	>0.9999	YGL184C	>0.9999	YLR192C	>0.9999
YDR184C	7.86	7.81	8.27	7.52	6.6	7.03	6.85	6.96	6.55	8.03	7.98	8.01	7.35	6.8	6.64	6.51													YBR296C	>0.9999	YOL072W	>0.9999	YGR077C	>0.9999	YMR290C	>0.9999
YDR185C	5.2	5.32	5.78	5.56	5.42	5.33	5.79	5.79	5.33	5.08	5.65	5.77	5.04	5.48	5.82	5.75													YJR144W	>0.9999	YER136W	>0.9999	YLR278C	>0.9999	YDR492W	>0.9999
YDR186C	8.89	8.78	8.65	8.45	9.31	8.84	8.51	8.41	9.29	9.07	8.5	8.36	9.32	9.28	8.43	8.55													YOR375C	>0.9999	YER101C	>0.9999	YPL234C	>0.9999	YDR197W	>0.9999
YDR188W	10.38	10.43	10.49	10.34	10.27	10.23	10.27	10.31	10.39	10.58	10.51	10.46	10.44	10.44	10.26	10.14													YHR168W	>0.9999	YHR177W	>0.9999	YIR032C	>0.9999	YJL071W	0.9997
YDR189W	9.22	8.71	9.04	9.03	8.98	9.02	8.95	9	8.67	8.95	8.83	8.54	9.06	8.8	8.91	8.88													YBR287W	>0.9999	YNR055C	>0.9999	YJL140W	>0.9999	YKL094W	>0.9999
YDR190C	10.08	9.78	9.8	9.76	9.71	9.78	9.47	9.53	9.56	10.01	9.81	9.82	9.84	9.82	9.45	9.45													YML058W-A	>0.9999	YNL321W	0.9819	YEL072W	>0.9999	YBR211C	>0.9999
YDR191W	6.01	6.55	6.14	6.48	6.43	6.33	6.49	6.45	6.38	6.26	6.56	6.53	6.48	6.48	6.59	6.55													YFR013W	>0.9999	YOL024W	>0.9999	YGR198W	>0.9999	YDR232W	>0.9999
YDR192C	6.95	6.92	6.9	6.65	6.82	6.67	6.84	6.89	6.63	6.86	6.59	6.61	6.8	6.77	6.75	6.8													YPR132W	>0.9999	YAL062W	>0.9999	YJL143W	>0.9999	YGL190C	>0.9999
YDR194C	9.79	9.27	9.74	9.61	9.61	9.51	9.45	9.45	9.4	10.01	9.6	9.71	9.94	9.88	9.34	9.31													YJR008W	>0.9999	YLR451W	0.4422	YNL221C	>0.9999	YKL184W	>0.9999
YDR194W-A	2.58	2.83	2.31	1.86	3.43	1.76	1.68	2.39	1.86	2.73	1.5	2.07	2.41	2.15	1.69	1.37													YJR082C	>0.9999	YGR221C	0.9938	YOR264W	>0.9999	YHR101C	>0.9999
YDR195W	7.8	7.66	7.74	7.79	7.81	7.54	7.58	7.57	7.97	7.87	7.5	7.46	7.56	7.59	7.56	7.29													YIR018W	>0.9999	YLR096W	>0.9999	YIL118W	>0.9999	YLR421C	>0.9999
YDR196C	7.8	7.82	7.64	7.85	8	8.02	7.92	7.86	8	7.67	8.12	8.27	8	7.96	7.88	7.84													YKL138C-A	>0.9999	YGL110C	>0.9999	YMR238W	>0.9999	YDR076W	>0.9999
YDR197W	6.43	6.82	6.53	6.59	6.61	6.7	6.77	6.71	6.24	6.72	6.88	6.8	7.06	7.16	6.74	6.82													YBR162W-A	>0.9999	YMR192W	>0.9999	YPL067C	>0.9999	YGR180C	>0.9999
YDR198C	7.25	6.78	7.24	6.98	6.7	6.68	6.87	6.78	6.81	7.14	6.78	6.73	6.83	6.5	6.62	6.57													YDR536W	>0.9999	YDL192W	>0.9999	YJL014W	>0.9999	YOR175C	>0.9999
YDR200C	7.96	7.8	7.73	7.79	8.11	7.72	7.74	7.84	7.74	8.06	7.89	7.92	8.21	8.25	7.75	7.95													YLR066W	>0.9999	YLR197W	>0.9999	YIL092W	>0.9999	YNL223W	>0.9999
YDR201W	6.92	6.67	6.84	7.06	7.14	7.06	6.98	6.98	6.99	6.87	7.28	7.36	7.24	7.19	7.02	7.02													YDR222W	>0.9999	YIL033C	>0.9999	YHR002W	>0.9999	YAL044C	>0.9999
YDR202C	7.01	7.06	7.22	7.39	7.1	7.19	7.38	7.45	7.33	6.93	7.56	7.58	7.28	7.45	7.45	7.43													YLR324W	>0.9999	YPL150W	>0.9999	YNL167C	>0.9999	YOL109W	>0.9999
YDR204W	7.31	7.79	7.37	7.69	7.75	7.7	7.84	7.81	7.97	7.27	7.74	7.68	7.48	7.61	7.94	7.76													YOR313C	>0.9999	YNL161W	>0.9999	YDL070W	0.9989	YIR031C	>0.9999
YDR205W	6.78	7.11	7.22	7.07	7.12	6.89	7.18	7.14	6.78	6.75	6.69	6.66	7.06	7.02	7.19	7.17													YBR076W	>0.9999	YLR137W	>0.9999	YLR211C	>0.9999	YMR123W	>0.9999
YDR206W	8.11	7.95	7.89	7.86	7.88	8.02	7.76	7.7	7.98	7.86	7.38	7.25	7.67	7.55	7.74	7.63													YKL060C	>0.9999	YNR013C	0.7677	YLR192C	>0.9999	YGL205W	>0.9999
YDR207C	7.56	7.79	8.04	7.83	8.38	8.17	7.86	7.88	8.14	7.91	7.66	7.69	8.31	8.24	7.93	7.95													YDR155C	>0.9999	YOR008C	>0.9999	YMR290C	>0.9999	YFL055W	>0.9999
YDR208W	8.43	8.51	8.42	8.42	8.24	8.24	8.4	8.27	8.63	8.5	8.37	8.31	8.57	8.53	8.29	8.26													YML086C	>0.9999	YLR372W	>0.9999	YDR492W	>0.9999	YJR119C	>0.9999
YDR210W	8.2	8.02	8.3	8.29	8.38	8.69	8.69	8.64	8.36	8.14	8.99	8.81	8.31	8.3	8.59	8.61													YKR035W-A	>0.9999	YBR236C	0.987	YDR197W	>0.9999	YDL069C	>0.9999
YDR211W	9.5	9.31	9.48	9.27	9.31	9.32	9.16	9.19	9.36	9.4	9.21	9.08	9.47	9.33	9.1	9.15													YMR188C	>0.9999	YCR036W	>0.9999	YJL071W	>0.9999	YOR097C	>0.9999
YDR212W	9.59	9.86	9.98	9.96	9.53	9.71	9.78	9.81	9.64	9.62	9.88	9.73	9.33	9.45	9.67	9.64													YDR460W	>0.9999	YGL026C	0.9446	YKL094W	>0.9999	YNL152W	>0.9999
YDR213W	6.52	6.44	6.53	6.39	6.69	6.52	6.36	6.37	7.1	6.58	6.69	6.63	6.91	6.92	6.31	6.24													YOR255W	>0.9999	YNL097C	>0.9999	YBR211C	>0.9999	YNL212W	>0.9999
YDR214W	9.92	10.18	9.41	9.75	9.72	9.72	9.72	9.62	10.26	9.82	9.84	9.87	9.4	9.54	9.68	9.83													YFL048C	>0.9999	YOR319W	0.6394	YDR232W	>0.9999	YER123W	>0.9999
YDR216W	6.93	7.43	7.03	7.06	6.4	6.32	7.03	6.93	7.18	6.81	6.99	7.05	6.24	6.36	6.85	6.96													YPR162C	>0.9999	YKL174C	>0.9999	YGL190C	>0.9999	YPL167C	>0.9999
YDR217C	8.1	7.76	7.82	7.53	8.05	7.66	7.38	7.4	7.78	8.33	7.43	7.47	8.38	8.15	7.28	7.28													YER124C	>0.9999	YAR068W	>0.9999	YKL184W	>0.9999	YIR030C	>0.9999
YDR218C	4.1	3.48	3.91	3.32	4.61	4.2	3.96	3.74	4.18	3.83	3.56	3.48	3.86	3.53	3.64	3.87													YPL112C	>0.9999	YDR146C	0.1479	YHR101C	0.9997	YCR081W	>0.9999
YDR219C	7.6	7.21	7.35	7.55	7.68	7.37	7.59	7.63	7.16	7.44	7.47	7.5	7.68	7.6	7.72	7.79													YNR043W	>0.9999	YDL072C	>0.9999	YLR421C	>0.9999	YKR057W	>0.9999
YDR221W	7.52	7.78	7.13	7.26	6.91	7.28	6.99	6.94	7.37	7.33	6.71	6.75	7.07	7	7	7.01													YOL103W	>0.9999	YJR152W	>0.9999	YDR076W	0.2065	YCR082W	>0.9999
YDR222W	8.24	7.71	7.77	8.14	6.9	7.07	7.29	7.07	5.63	7.65	7.85	8.12	6.7	6.9	6.66	6.92													YPL162C	>0.9999	YBL067C	>0.9999	YGR180C	>0.9999	YDR288W	>0.9999
YDR223W	4.28	4.28	3.62	4.06	4.5	3.66	3.49	3.64	3.94	3.96	3.74	3.95	3.59	3.72	3.52	3.56													YNR011C	>0.9999	YDR351W	>0.9999	YOR175C	>0.9999	YMR063W	>0.9999
YDR224C	12.25	12.22	12.06	12.17	12.08	12.17	12.07	12.15	11.86	12.25	12.21	12.21	12.1	12.05	12.15	12.11													YBR165W	>0.9999	YGR226C	>0.9999	YOR130C	>0.9999	YKL068W	>0.9999
YDR225W	12.07	11.85	11.86	11.96	11.87	11.82	11.85	11.96	11.62	12.11	12	12	12.1	12.07	12	11.99													YDL138W	0.4125	YKL222C	0.7968	YNL223W	>0.9999	YDR221W	>0.9999
YDR226W	11.74	11.84	11.79	11.77	11.69	11.66	11.76	11.82	11.75	11.84	11.87	11.9	11.73	11.8	11.87	11.9													YML030W	>0.9999	YKL073W	>0.9999	YAL044C	>0.9999	YDR378C	>0.9999
YDR227W	8.37	8.21	7.94	7.88	8.14	8.02	7.58	7.76	7.88	8.14	7.77	7.76	8.38	8.12	7.6	7.8													YNL210W	>0.9999	YDL131W	>0.9999	YOL109W	>0.9999	YIL015W	>0.9999
YDR228C	7.48	7.73	7.81	7.85	8.02	7.5	7.75	7.78	7.52	7.73	7.75	7.73	7.97	8.05	7.66	7.68													YOR207C	>0.9999	YDL061C	>0.9999	YIR031C	>0.9999	YBL018C	>0.9999
YDR229W	7.22	7.36	7.07	7.11	7.39	7.37	7.21	7.05	7.56	7.19	7	6.93	7.35	7.4	7.25	7.09													YIL169C	>0.9999	YJL063C	>0.9999	YMR123W	>0.9999	YLR395C	>0.9999
YDR231C	7.09	7.21	7.01	7.53	7.75	7.79	7.46	7.52	8.39	6.98	7.34	7.42	7.63	7.84	7.77	7.55													YGL016W	>0.9999	YGR077C	>0.9999	YGL205W	>0.9999	YKL012W	>0.9999
YDR232W	10.13	10.44	10.09	10.02	9.92	9.91	9.79	9.79	10.36	10.08	9.56	9.5	9.82	9.84	9.77	9.7													YBR182C-A	>0.9999	YPL234C	>0.9999	YFL055W	>0.9999	YGL195W	>0.9999
YDR233C	11.13	11.32	11.35	11.29	11.27	11.09	11.23	11.24	10.84	11.18	11.08	11.08	11.11	11.22	11.28	11.23													YDL113C	>0.9999	YIR032C	0.1959	YJR119C	0.9983	YGR006W	>0.9999
YDR234W	10.59	10.38	10.56	10.53	10.32	10.53	10.54	10.25	10.34	10.45	10.01	9.95	10.09	10.2	10.14	10.01													YFL009W	>0.9999	YJL140W	>0.9999	YDL069C	>0.9999	YBR238C	>0.9999
YDR235W	6.94	7.19	7.17	7.26	7.02	7.1	7.46	7.41	7.03	6.88	7.36	7.36	7.24	7.08	7.45	7.46													YER114C	>0.9999	YGR198W	>0.9999	YOR097C	>0.9999	YHR132W-A	>0.9999
YDR236C	6.58	6.77	7.15	7.16	6.62	6.84	7.44	7.4	7.09	6.55	7.58	7.56	6.8	6.61	7.46	7.36													YCL045C	>0.9999	YJL143W	>0.9999	YNL152W	>0.9999	YER111C	>0.9999
YDR237W	7.61	7.45	7.79	7.78	7.75	8.01	7.8	7.76	7.69	7.76	7.92	8	7.68	7.61	7.74	7.71													YOR209C	>0.9999	YNL221C	>0.9999	YNL212W	>0.9999	YDR194W-A	0.0865
YDR238C	9.99	9.95	9.92	9.97	10.03	10.04	9.79	9.84	9.81	9.99	9.9	9.88	10.16	10.11	9.8	9.88													YMR256C	>0.9999	YOR264W	>0.9999	YER123W	>0.9999	YLR462W	>0.9999
YDR239C	7.17	7.07	7.07	6.98	6.85	6.76	6.68	6.76	7.02	7.06	6.68	6.63	7.27	7.07	6.7	6.54													YMR126C	>0.9999	YIL118W	0.9998	YPL167C	0.9997	YCR101C	>0.9999
YDR240C	6.35	6.55	6.48	6.42	6.16	6.2	6.29	6.34	6.01	6.39	6.78	6.53	6.2	6.08	6.27	6.17													YDL204W	>0.9999	YMR238W	>0.9999	YCR098C	>0.9999	YPL138C	>0.9999
YDR242W	7.41	7.43	7.02	7.26	7.54	7.35	7.42	7.28	9	7.35	6.88	6.96	7.51	7.46	7.84	7.53													YDR532C	>0.9999	YPL067C	0.9302	YIR030C	>0.9999	YPL145C	>0.9999
YDR243C	6.82	6.15	6.48	6.33	5.9	6.28	6.02	6.16	6.18	6.61	6.1	6.06	6.48	6.11	6	6.22													YPL059W	>0.9999	YJL014W	>0.9999	YCR081W	>0.9999	YJR015W	>0.9999
YDR244W	6.79	6.57	6.8	6.88	7.13	6.94	7.36	7.23	6.71	6.81	6.77	6.8	7.01	7.02	7.11	7.22													YMR109W	>0.9999	YIL092W	>0.9999	YKR057W	>0.9999	YIL039W	>0.9999
YDR245W	9.19	9.24	9.28	9.28	9	9.09	9.12	9.12	8.94	9.25	9.34	9.38	9.45	9.33	9.08	9.17													YDR481C	>0.9999	YHR002W	0.9994	YCR082W	>0.9999	YOL155C	>0.9999
YDR246W	7.57	7.52	7.63	7.58	7.68	7.51	7.67	7.62	7.76	7.53	7.55	7.57	7.58	7.7	7.68	7.8													YBR011C	>0.9999	YNL167C	0.9974	YDR288W	>0.9999	YHL029C	>0.9999
YDR246W-A	3.68	4.13	3.61	3.68	4.32	3.88	3.5	3.31	3.71	3.82	3.48	3.68	3.59	4.11	3.69	3.62													YER096W	>0.9999	YDL070W	>0.9999	YMR063W	0.3412	YJR093C	>0.9999
YDR247W	6.02	5.52	6.54	6.57	6.78	6.37	6.88	6.8	6.3	5.97	5.85	5.81	5.99	6.3	7.04	7.19													YGR065C	>0.9999	YLR211C	>0.9999	YKL068W	>0.9999	YJR112W	>0.9999
YDR248C	8.57	8.24	8.05	8.37	8.67	8.73	8.46	8.32	9.04	8.46	8.48	8.53	8.6	8.44	8.47	8.42													YDL008W	>0.9999	YLR192C	>0.9999	YDR221W	>0.9999	YLR394W	>0.9999
YDR249C	5.16	5.67	6.05	5.81	5.34	5.31	5.95	5.9	5.15	5.61	5.86	5.53	5.59	5.57	6.03	5.94													YFL068W	>0.9999	YMR290C	0.9136	YDR378C	>0.9999	YNL012W	0.3416
YDR251W	8.88	9.2	8.57	8.78	9.25	8.96	8.86	8.86	9.02	8.62	8.46	8.34	8.84	8.82	8.81	8.69													YDR320C	0.4524	YDR492W	0.9998	YIL015W	>0.9999	YDR099W	>0.9999
YDR252W	5.71	5.81	5.59	5.8	5.76	5.94	5.66	5.67	5.14	5.8	5.82	6.03	5.46	5.76	5.86	5.9													YJL179W	>0.9999	YDR197W	>0.9999	YBL018C	>0.9999	YGL166W	>0.9999
YDR253C	8.91	8.5	7.06	8.54	8.91	8.69	8.42	8.65	8.7	8.3	7.96	8.09	8.95	8.61	8.54	8.23													YLR136C	>0.9999	YJL071W	>0.9999	YLR395C	>0.9999	YGL238W	>0.9999
YDR254W	7.24	7.26	6.65	7.23	7.59	7.48	7.26	7.28	7.6	7.01	7.23	7.41	7.7	7.73	7.33	7.3													YDR002W	>0.9999	YKL094W	>0.9999	YKL012W	>0.9999	YIL149C	>0.9999
YDR255C	6.88	6.17	6.11	6.6	6.6	6.69	6.75	6.58	7.13	5.88	5.94	6.07	5.83	6.12	6.73	6.82													YHR004C	>0.9999	YBR211C	>0.9999	YGL195W	>0.9999	YLR042C	>0.9999
YDR256C	3.22	3.4	3.66	3.63	3.76	3.05	3.37	3.44	3.1	3.23	3.17	3.14	3.18	3.48	3.26	3.33													YLR218C	>0.9999	YDR232W	0.7677	YGR006W	>0.9999	YPL160W	>0.9999
YDR257C	6.99	6.7	7.23	7.19	6.41	6.58	7.04	6.98	6.4	6.59	7.33	7.41	6.78	6.65	6.84	6.82													YBR006W	>0.9999	YGL190C	>0.9999	YBR238C	>0.9999	YFL046W	>0.9999
YDR258C	8.79	9.16	8.14	8.9	10.09	9.88	9.66	9.25	9.99	8.9	8.83	8.56	9.63	10.12	9.36	9.34													YGR193C	>0.9999	YKL184W	>0.9999	YHR132W-A	>0.9999	YLL046C	>0.9999
YDR259C	6.37	6.78	5.81	6.39	5.86	5.23	5.02	5.14	7.09	6.47	6.05	6.44	5.45	5.72	5.36	5.55													YGL059W	>0.9999	YHR101C	>0.9999	YER111C	>0.9999	YLR289W	>0.9999
YDR260C	6.49	6.74	6.7	6.45	6.69	6.93	6.79	6.65	7.2	6.55	6.89	6.68	6.81	6.85	6.73	6.6													YEL029C	>0.9999	YLR421C	0.6394	YDR194W-A	>0.9999	YNL079C	>0.9999
YDR261C	7.19	7.46	7.36	7.37	7.35	7.07	7.59	7.69	7.57	7.14	7.2	7.18	7.49	7.3	7.77	7.76													YGL056C	>0.9999	YDR076W	>0.9999	YLR462W	0.9972	YEL050C	>0.9999
YDR261C-D	10.9	10.57	9.39	9.65	10.27	10.01	9.06	9.2	10.58	10.76	9.12	9.07	10.51	9.68	9.2	9.03													YPR054W	>0.9999	YGR180C	>0.9999	YPL138C	>0.9999	YDR497C	>0.9999
YDR261W-B	11.55	10.78	10.2	10.42	10.91	10.8	9.85	10.11	11.57	11.39	9.94	9.85	11.05	10.54	10.05	10.15													YML109W	>0.9999	YOR175C	>0.9999	YPL145C	>0.9999	YBR079C	>0.9999
YDR262W	7.54	7.71	7.62	7.84	7.98	7.9	8.03	7.87	8.44	7.73	7.8	7.86	7.89	8.2	8.09	7.98													YIR023W	>0.9999	YOR130C	0.7968	YDR281C	0.9815	YOL114C	>0.9999
YDR263C	5.76	6.21	5.67	5.78	6.28	5.9	5.98	5.94	6.02	5.89	5.69	5.76	6.38	6.4	6.03	5.97													YJR115W	>0.9999	YNL223W	>0.9999	YJR015W	>0.9999	YNR035C	>0.9999
YDR264C	7.98	8.25	7.98	8.03	7.88	8.05	7.97	8.09	8.12	7.53	8.06	7.8	8.09	7.98	8.1	8.16													YNL219C	>0.9999	YAL044C	>0.9999	YIL039W	>0.9999	YHR050W	>0.9999
YDR265W	7.05	7.09	6.69	6.88	7.04	7	7.03	7.06	7.12	6.89	6.84	6.91	7.2	7.07	7.2	7.04													YNL300W	>0.9999	YOL109W	>0.9999	YOL155C	>0.9999	YIL097W	>0.9999
YDR266C	8.17	8.21	8.34	8.2	8.13	8.19	8.21	8.24	7.98	8.15	8.06	7.93	8.37	8.26	8.06	8.12													YAR028W	>0.9999	YIR031C	>0.9999	YHL029C	>0.9999	YKL003C	>0.9999
YDR267C	7.34	7.41	7.49	7.4	7.16	7.32	7.23	7.35	7.34	7.23	7.5	7.6	7.26	7.31	7.2	7.21													YLR088W	>0.9999	YMR123W	>0.9999	YJR093C	>0.9999	YOR362C	>0.9999
YDR268W	6.24	6.65	6.41	6.74	6.35	6.71	6.79	6.75	6.52	6.19	6.95	6.97	6.38	6.43	6.89	6.91													YBR230W-A	>0.9999	YGL205W	>0.9999	YJR112W	>0.9999	YBR296C	>0.9999
YDR270W	6.64	7.49	6.36	6.58	7.64	7.01	6.99	7.11	7.23	7.03	6.96	6.85	7.5	7.67	7.42	7.06													YIR026C	>0.9999	YFL055W	>0.9999	YLR394W	>0.9999	YJR144W	>0.9999
YDR272W	9.07	9.1	8.71	8.93	9.28	9.27	8.95	9	9.32	9.01	9.31	9.1	9.09	9.26	8.98	9.05													YNR004W	>0.9999	YJR119C	>0.9999	YNL012W	>0.9999	YOR375C	>0.9999
YDR273W	6.07	6.3	5.97	5.88	7.02	6.3	6.03	6.06	6.73	6.45	5.82	5.93	6.5	6.48	6.31	6.21													YOR389W	>0.9999	YDL069C	>0.9999	YDR099W	>0.9999	YHR168W	>0.9999
YDR275W	7.28	6.91	7.01	7.2	6.99	6.94	6.76	6.95	7.68	6.91	7.24	7.56	7.36	7.62	7.06	7.02													YCR031C	>0.9999	YOR097C	>0.9999	YGL166W	>0.9999	YBR287W	>0.9999
YDR276C	11.93	11.93	11.6	11.68	12.07	12.05	11.85	11.8	12.01	11.98	11.71	11.71	12.01	12	11.86	11.87													YLR162W	>0.9999	YNL152W	>0.9999	YGL238W	>0.9999	YML058W-A	>0.9999
YDR277C	6.6	7.44	5.68	6.47	6.75	6.51	5.93	5.8	7.63	6.58	5.84	5.98	7.23	7.66	6.13	6.43													YDL092W	>0.9999	YNL212W	>0.9999	YIL149C	>0.9999	YFR013W	>0.9999
YDR279W	7.56	7.47	7.46	7.47	7.26	7.46	7.2	7.28	7.41	7.73	7.76	7.77	7.48	7.53	7.33	7.41													YIL014C-A	>0.9999	YER123W	>0.9999	YLR042C	0.2692	YPR132W	>0.9999
YDR280W	8.84	8.81	9.01	8.66	8.5	8.63	8.31	8.39	8.5	8.8	8.96	8.96	8.74	8.52	8.34	8.31													YEL066W	>0.9999	YPL167C	>0.9999	YPL160W	>0.9999	YJR008W	>0.9999
YDR281C	7.83	6.41	8.01	7.24	6.19	7.03	5.97	7.47	7.1	7.87	7.75	7.63	7.5	6.87	7.24	7.57													YLR263W	>0.9999	YCR098C	>0.9999	YFL046W	>0.9999	YJR082C	>0.9999
YDR282C	5.87	5.98	5.97	5.99	5.77	5.78	5.94	6	5.89	5.83	5.8	5.93	5.65	5.6	6.01	6													YNR045W	>0.9999	YIR030C	0.8733	YLR289W	>0.9999	YIR018W	>0.9999
YDR283C	7.86	8	7.24	7.77	7.86	7.73	7.59	7.51	7.74	7.76	7.45	7.47	7.76	7.72	7.47	7.3													YBR233W	>0.9999	YKR057W	>0.9999	YNL079C	>0.9999	YKL138C-A	>0.9999
YDR284C	7.82	8.27	8.06	8.23	8.73	8.61	8.51	8.48	8.4	7.94	8.28	8.27	8.3	8.39	8.49	8.46													YDR363W-A	>0.9999	YCR082W	>0.9999	YEL050C	>0.9999	YBR162W-A	>0.9999
YDR285W	6.76	5.88	6.47	6.8	6.53	6.57	6.33	6.27	7.01	6.2	6.35	6.49	5.77	5.92	6.17	6.28													YNL038W	>0.9999	YDR288W	0.2782	YDR497C	>0.9999	YDR536W	>0.9999
YDR286C	6.11	6.32	6.31	6.48	6.67	6.76	6.77	6.74	6.81	6.51	6.65	6.66	6.75	6.7	6.71	6.67													YIL113W	>0.9999	YMR063W	0.3277	YBR079C	>0.9999	YLR066W	>0.9999
YDR287W	7.46	7.65	7.03	7.18	7.27	7.42	7.21	7.27	7.55	7.43	7.28	7.25	7.22	7.22	7.29	7.29													YJR100C	>0.9999	YKL068W	>0.9999	YOL114C	>0.9999	YDR222W	0.9165
YDR288W	6.52	6.56	6.31	6.64	6.66	6.75	6.66	6.48	6.43	6.64	7.01	7.15	6.5	6.76	6.72	6.54													YIL008W	>0.9999	YDR221W	0.9819	YNR035C	>0.9999	YLR324W	>0.9999
YDR289C	7.29	6.9	7.03	6.94	6.8	6.78	6.79	6.83	6.89	7.08	7	7.11	7.04	6.96	6.57	6.71													YKR079C	>0.9999	YDR378C	>0.9999	YHR050W	>0.9999	YBR076W	>0.9999
YDR291W	7.03	7.27	7.16	6.93	6.88	6.72	6.94	6.96	6.87	6.98	7.05	7	7.27	7.2	6.98	7													YPR073C	>0.9999	YIL015W	>0.9999	YIL097W	>0.9999	YKL060C	>0.9999
YDR292C	8.72	8.96	8.5	8.47	8.24	8.31	8.33	8.36	8.17	8.6	8.33	8.22	8.61	8.36	8.32	8.31													YOR162C	>0.9999	YBL018C	0.9909	YKL003C	>0.9999	YDR155C	>0.9999
YDR293C	9.48	9.44	9.48	9.52	9.94	9.54	9.68	9.62	10.05	9.65	8.91	8.76	9.54	9.42	9.63	9.6													YML094W	>0.9999	YLR395C	0.987	YOR362C	>0.9999	YML086C	>0.9999
YDR294C	8.32	8.72	8.47	8.59	8.4	8.65	8.74	8.65	8.8	8.36	8.59	8.48	8.62	8.52	8.7	8.58													YDR196C	>0.9999	YKL012W	>0.9999	YBR296C	0.8266	YKR035W-A	>0.9999
YDR295C	8.09	8.08	7.78	7.82	7.95	7.67	7.65	7.79	7.86	8.38	7.9	7.88	7.95	7.88	7.68	7.78													YCR003W	>0.9999	YGL195W	0.9938	YJR144W	>0.9999	YMR188C	>0.9999
YDR296W	7.49	7.81	7.49	7.6	7.9	8.03	7.79	7.82	7.61	7.79	7.71	7.69	7.94	7.96	7.9	7.83													YJL084C	>0.9999	YGR006W	>0.9999	YOR375C	>0.9999	YDR460W	>0.9999
YDR297W	8.07	7.97	8.51	8.19	7.97	8.08	8.31	8.47	7.87	7.93	8.5	8.18	7.83	8.17	8.53	8.59													YGL094C	>0.9999	YHR132W-A	>0.9999	YHR168W	>0.9999	YOR255W	>0.9999
YDR298C	10.3	10.74	10.4	10.76	10.32	10.45	10.54	10.59	10.74	10.42	10.98	10.97	9.61	9.99	10.73	10.58													YEL018W	>0.9999	YER111C	>0.9999	YBR287W	>0.9999	YFL048C	>0.9999
YDR299W	9.29	8.97	9.35	8.77	7.97	8.31	8.09	8.28	7.97	9.26	8.8	8.73	8.65	8.12	7.96	7.93													YDL013W	>0.9999	YDR194W-A	>0.9999	YML058W-A	>0.9999	YPR162C	>0.9999
YDR300C	8.83	8.47	8.91	8.68	8.13	8.41	8.47	8.36	8.66	8.48	8.59	8.61	8.11	7.88	8.34	8.32													YAL051W	>0.9999	YLR462W	>0.9999	YFR013W	>0.9999	YER124C	>0.9999
YDR301W	7.43	7.9	7.49	7.4	7.41	7.29	7.33	7.38	7.28	7.42	7.29	7.24	7.87	7.59	7.34	7.26													YNL025C	>0.9999	YPL138C	>0.9999	YPR132W	>0.9999	YPL112C	>0.9999
YDR302W	7.95	8.02	8.01	8.03	7.98	8.08	8.02	8.07	7.81	8.14	8.42	8.41	8.3	8.07	7.99	8													YPL104W	>0.9999	YPL145C	0.9302	YJR008W	>0.9999	YNR043W	>0.9999
YDR303C	8.46	8.27	8.56	8.53	8.59	8.34	8.43	8.13	8.26	8.66	8.54	8.55	8.99	8.8	8.16	8.35													YNL148C	>0.9999	YDR281C	>0.9999	YJR082C	>0.9999	YOL103W	>0.9999
YDR304C	10.01	10.46	9.98	10.32	10.31	10.36	10.3	10.3	10.37	10.28	10.41	10.34	9.93	10.34	10.4	10.3													YAR050W	>0.9999	YJR015W	>0.9999	YIR018W	>0.9999	YPL162C	>0.9999
YDR305C	7.23	7.24	7.22	7.32	7.37	7.43	7.38	7.46	7.49	7.43	7.72	7.69	7.37	7.45	7.56	7.44													YLR413W	>0.9999	YIL039W	>0.9999	YKL138C-A	>0.9999	YNR011C	>0.9999
YDR306C	7.13	7.21	6.91	7.07	7.19	7.4	7.26	7.25	7.67	7.06	7.09	7.14	7.26	7.39	7.29	7.26													YGL143C	>0.9999	YOL155C	>0.9999	YBR162W-A	>0.9999	YBR165W	>0.9999
YDR307W	7.97	7.65	7.85	8.14	8.15	8.27	8.24	8.21	8.12	7.9	7.52	7.38	7.85	7.63	8.3	8.34													YER161C	>0.9999	YHL029C	>0.9999	YDR536W	0.2479	YDL138W	>0.9999
YDR308C	7.84	7.71	7.52	7.68	7.45	7.83	7.49	7.41	7.76	7.87	7.87	7.83	7.49	7.58	7.36	7.3													YML121W	>0.9999	YJR093C	>0.9999	YLR066W	>0.9999	YML030W	>0.9999
YDR309C	8.93	8.8	7.99	8.32	9.06	9.03	8.42	8.37	8.95	8.94	7.82	7.81	8.57	8.53	8.41	8.38													YPR004C	>0.9999	YJR112W	>0.9999	YDR222W	>0.9999	YNL210W	>0.9999
YDR310C	10.1	9.93	9.63	9.76	10.33	10.23	9.6	9.55	10.14	10.02	9.36	9.38	10.1	9.97	9.58	9.52													YGR247W	>0.9999	YLR394W	0.2343	YLR324W	>0.9999	YOR207C	>0.9999
YDR311W	8	8.06	8.18	8.07	8.09	7.99	8.22	8.17	8.05	8.07	7.99	7.93	8.38	8.12	8.14	8.16													YFR036W	>0.9999	YNL012W	>0.9999	YOR313C	>0.9999	YIL169C	>0.9999
YDR312W	8.06	7.28	7.89	7.69	7.25	7.44	7.32	7.57	7.38	7.59	7.38	7.59	6.92	6.88	7.22	6.94													YNL049C	>0.9999	YDR099W	>0.9999	YBR076W	>0.9999	YGL016W	>0.9999
YDR313C	7.18	7.44	6.75	7.09	7.22	6.98	6.85	6.55	7.58	7.64	7.28	7.27	7.58	7.57	6.89	6.76													YDR465C	>0.9999	YGL166W	>0.9999	YKL060C	>0.9999	YBR182C-A	>0.9999
YDR314C	4.72	4.13	4.01	4.15	4.36	3.98	3.76	3.9	4.31	4.37	3.9	4.06	4.26	4.42	3.75	3.87													YMR280C	>0.9999	YGL238W	>0.9999	YDR155C	>0.9999	YDL113C	>0.9999
YDR315C	5.77	6.02	5.69	5.89	6.15	6.06	6.21	6.23	6.6	6	6.31	6.32	6.33	6.23	6.35	6.24													YLR006C	>0.9999	YIL149C	0.987	YML086C	>0.9999	YFL009W	>0.9999
YDR316W	8.2	8.2	7.73	7.92	8.52	8.25	7.9	7.81	8.4	8.18	7.75	7.88	8.26	8.17	7.86	7.81													YER037W	>0.9999	YLR042C	>0.9999	YKR035W-A	>0.9999	YER114C	>0.9999
YDR316W-B	12.69	12.61	11.63	11.79	12.47	12.26	11.57	11.56	12.84	12.69	11.33	11.35	12.28	11.99	11.68	11.66													YDR164C	>0.9999	YPL160W	>0.9999	YMR188C	>0.9999	YCL045C	>0.9999
YDR317W	4.13	3.84	5.75	4.35	5.62	6.46	5.31	4.2	7.18	4	4.35	4.35	3.36	3.76	5.29	5.24													YOR020W-A	>0.9999	YFL046W	>0.9999	YDR460W	>0.9999	YOR209C	>0.9999
YDR318W	7.21	6.93	6.77	7.1	7.08	7.19	7.07	6.89	7.46	6.94	7.07	7.2	7.36	7.28	6.93	6.96													YDL211C	>0.9999	YLL046C	>0.9999	YFL048C	>0.9999	YMR256C	>0.9999
YDR319C	7.76	8.2	7.25	7.54	7.66	7.71	7.64	7.6	7.92	7.7	7.61	7.61	7.72	7.84	7.78	7.7													YER014W	>0.9999	YLR289W	>0.9999	YPR162C	>0.9999	YMR126C	>0.9999
YDR320C	7.4	7.69	7.32	7.13	7.46	7.27	7.06	7.06	7.19	7.36	7.05	7.02	7.36	7.26	7.04	7.1													YML072C	>0.9999	YNL079C	>0.9999	YER124C	>0.9999	YDL204W	>0.9999
YDR320C-A	8.4	8.26	8.22	8.48	8.4	8.66	8.56	8.49	8.76	8.6	8.74	8.82	8.83	8.6	8.54	8.46													YKL208W	>0.9999	YEL050C	>0.9999	YPL112C	>0.9999	YDR532C	>0.9999
YDR321W	9.59	9.79	10.19	9.95	9.6	9.9	9.93	9.87	9.73	9.54	10.04	10.17	9.55	9.57	9.75	9.78													YPR153W	>0.9999	YDR497C	>0.9999	YNR043W	>0.9999	YPL059W	>0.9999
YDR322C-A	9.85	9.92	9.64	10.17	10.02	10	9.95	9.86	10.39	10.1	10.13	10.24	9.93	10.12	10.05	9.85													YKL100C	>0.9999	YBR079C	0.967	YOL103W	>0.9999	YMR109W	>0.9999
YDR322W	7.72	7.63	8.14	8.19	8.26	8.36	8.37	8.38	8.61	7.56	8.02	8.09	7.35	7.55	8.51	8.55													YDR415C	>0.9999	YOL114C	>0.9999	YPL162C	>0.9999	YDR481C	>0.9999
YDR323C	5.83	6	5.91	5.93	6.1	5.71	6.02	6.15	6.21	6.06	6.02	5.92	6.11	6.03	6.29	6.12													YOL055C	>0.9999	YNR035C	>0.9999	YNR011C	>0.9999	YBR011C	>0.9999
YDR324C	9.24	8.77	9.24	8.59	7.96	8.17	8.19	8.28	7.79	9.15	8.7	8.47	8.79	8.29	7.92	7.92													YOL140W	>0.9999	YHR050W	>0.9999	YBR165W	>0.9999	YER096W	>0.9999
YDR325W	7.33	7.05	7.16	7.12	6.97	6.94	7.06	7.09	6.92	7.15	7.16	7.21	7.3	6.96	6.93	7.04													YER148W	>0.9999	YIL097W	>0.9999	YDL138W	>0.9999	YGR065C	>0.9999
YDR326C	8.98	9.33	8.7	9.07	8.94	8.88	8.84	8.52	8.82	9.06	8.9	8.84	9.12	9.29	8.59	8.62													YLR100W	>0.9999	YKL003C	>0.9999	YML030W	>0.9999	YDL008W	>0.9999
YDR328C	9.13	9.23	9.11	9.28	9.24	9.37	9.25	9.21	9.29	8.93	9.47	9.44	8.87	9.17	9.24	9.27													YNL224C	>0.9999	YOR362C	>0.9999	YNL210W	0.1101	YFL068W	>0.9999
YDR329C	7.7	7.52	7.36	7.52	7.6	7.67	7.44	7.53	7.92	7.59	7.38	7.4	7.73	7.66	7.61	7.55													YOR177C	>0.9999	YJR144W	0.9984	YOR207C	>0.9999	YDR320C	>0.9999
YDR330W	6.82	7.26	6.3	6.65	6.84	6.91	6.62	6.48	7.18	6.83	6.55	6.55	6.89	7.04	6.65	6.61													YOL159C	>0.9999	YOR375C	>0.9999	YIL169C	0.1601	YJL179W	>0.9999
YDR331W	8.23	8.17	8.6	8.41	8.34	8.42	8.4	8.41	8.52	8.28	8.4	8.38	8.34	8.19	8.43	8.34													YJR070C	>0.9999	YHR168W	>0.9999	YGL016W	>0.9999	YDR002W	>0.9999
YDR332W	6.42	6.77	6.28	6.24	6.48	6.06	6.11	6.13	5.93	6.63	6.3	6.19	6.5	6.49	6.09	6.16													YKL056C	>0.9999	YBR287W	>0.9999	YBR182C-A	>0.9999	YHR004C	>0.9999
YDR333C	7.06	7.41	7.57	7.51	7.02	7.05	7.58	7.58	6.96	7.08	7.65	7.68	7.29	7.27	7.49	7.62													YPR068C	>0.9999	YML058W-A	>0.9999	YDL113C	>0.9999	YGL007C-A	>0.9999
YDR334W	8.42	8.78	8.42	8.38	8.73	8.28	8.25	8.22	8.39	8.67	8.53	8.57	9.3	9.05	8.19	8.34													YBR167C	>0.9999	YFR013W	>0.9999	YFL009W	>0.9999	YLR218C	>0.9999
YDR335W	9.4	9.35	8.92	9.01	9.46	9.25	8.87	8.96	9.52	9.45	8.93	8.82	9.87	9.68	8.92	8.93													YML049C	>0.9999	YPR132W	0.9568	YER114C	>0.9999	YBR006W	>0.9999
YDR336W	6.13	6.44	6.28	6.47	6.19	5.98	6.46	6.51	6.26	6.29	6.49	6.55	6.48	6.62	6.45	6.61													YOR106W	>0.9999	YJR008W	>0.9999	YCL045C	>0.9999	YGR193C	>0.9999
YDR337W	7.64	7.58	7.49	7.47	7.67	7.72	7.57	7.74	7.52	7.6	8.08	8.14	7.35	7.84	7.52	7.27													YFL040W	>0.9999	YJR082C	0.7968	YOR209C	>0.9999	YGL059W	0.0634
YDR338C	6.24	6.62	6.56	6.29	6.42	6.39	6.57	6.48	6.19	6.11	6.39	6.3	6.41	6.51	6.58	6.63													YML078W	>0.9999	YIR018W	0.6726	YMR256C	>0.9999	YEL029C	>0.9999
YDR339C	9.45	9.55	9.32	9.28	8.92	9.24	8.97	8.98	9.1	9.69	9.53	9.59	9.04	9.17	8.94	8.92													YNL015W	>0.9999	YKL138C-A	0.9302	YMR126C	>0.9999	YGL056C	>0.9999
YDR341C	11.56	11.57	11.62	11.45	11.35	11.41	11.48	11.35	11.4	11.59	11.13	11.19	11.48	11.5	11.3	11.24													YDL140C	>0.9999	YBR162W-A	>0.9999	YDL204W	>0.9999	YPR054W	>0.9999
YDR342C	9.29	10.69	8.1	8.5	10.93	10.71	8.62	8.46	9.07	10.28	7.73	7.63	11.06	11.25	7.84	8.01													YER056C	>0.9999	YDR536W	>0.9999	YDR532C	>0.9999	YML109W	>0.9999
YDR345C	12.01	12.25	11.81	11.74	11.82	11.78	11.81	11.83	12.24	12	11.65	11.57	12.05	12	12.01	12.03													YLL019C	>0.9999	YLR066W	>0.9999	YPL059W	>0.9999	YIR023W	>0.9999
YDR346C	9.24	9.08	9.27	9.06	8.81	8.99	8.72	8.63	9.34	9.2	9.04	9.12	8.86	8.82	8.63	8.64													YLR405W	>0.9999	YDR222W	>0.9999	YMR109W	>0.9999	YJR115W	>0.9999
YDR347W	7.98	8.31	8.18	8.25	7.99	8.21	8.2	8.14	8.08	8.03	8.31	8.26	8.16	8.15	8.04	8.14													YDR318W	>0.9999	YLR324W	>0.9999	YDR481C	>0.9999	YNL219C	>0.9999
YDR348C	8.71	8.79	8.3	8.41	8.69	8.58	8.19	8.27	8.43	8.88	8.58	8.5	8.87	8.89	8.12	8.16													YKR061W	>0.9999	YOR313C	>0.9999	YBR011C	>0.9999	YNL300W	>0.9999
YDR349C	8.67	9.04	8.51	8.47	8.45	8.48	8.59	8.48	9	8.77	8.3	8.22	8.74	8.51	8.59	8.57													YIR009W	>0.9999	YBR076W	0.1343	YGR065C	>0.9999	YAR028W	>0.9999
YDR350C	6.78	7.03	6.72	6.95	6.84	6.79	7.17	6.92	6.86	6.69	6.66	6.62	6.95	6.94	7.06	6.85													YBL080C	>0.9999	YKL060C	>0.9999	YDL008W	>0.9999	YLR088W	>0.9999
YDR351W	8.38	8.24	8.37	8.18	8.12	7.92	8.23	8.21	8.23	8.61	8.25	8.29	8.82	8.65	8.17	7.98													YOR093C	>0.9999	YDR155C	>0.9999	YFL068W	0.9998	YBR230W-A	>0.9999
YDR352W	7.74	7.77	7.95	7.89	7.15	7.44	7.72	7.77	7.29	7.63	7.86	7.93	7.45	7.43	7.94	7.84													YLR271W	>0.9999	YML086C	>0.9999	YDR320C	>0.9999	YIR026C	>0.9999
YDR353W	11.47	11.44	10.95	11.17	11.07	11.14	10.99	10.89	11.28	11.55	11.21	11.19	11.18	11.23	10.88	10.92													YNL056W	>0.9999	YKR035W-A	>0.9999	YJL179W	>0.9999	YNR004W	>0.9999
YDR354W	8.05	8.16	8.59	8.62	7.97	8.17	8.85	8.33	8.27	7.99	8.16	8.13	8.13	8.09	8.23	8.01													YOR279C	>0.9999	YMR188C	0.2144	YLR136C	>0.9999	YCR031C	>0.9999
YDR356W	7.05	6.49	7	6.94	6.98	6.82	6.88	7.03	6.58	7.18	6.86	6.82	7.13	6.95	7.06	7.15													YGL207W	>0.9999	YDR460W	>0.9999	YDR002W	>0.9999	YLR162W	>0.9999
YDR357C	6.91	6.73	6.78	6.92	7.1	7.29	7.03	7	7.55	6.97	7.21	7.35	6.88	7.1	7.02	7.05													YKL029C	>0.9999	YOR255W	0.7053	YHR004C	>0.9999	YDL092W	>0.9999
YDR358W	6.78	7.57	6.14	6.91	7.48	7.3	7.27	7.28	7.67	6.81	7.05	6.97	7.09	7.55	7.34	7.33													YBR057C	>0.9999	YFL048C	>0.9999	YLR218C	>0.9999	YIL014C-A	>0.9999
YDR359C	7.84	7.7	7.36	7.36	8.05	7.64	7.53	7.21	7.97	7.74	6.93	6.79	7.84	7.55	7.37	7.11													YOL166W-A	>0.9999	YPR162C	>0.9999	YBR006W	>0.9999	YEL066W	>0.9999
YDR361C	8.6	8.39	8.83	8.32	7.49	7.97	7.75	7.69	8.11	8.45	8.6	8.66	7.83	7.77	7.52	7.54													YLR325C	>0.9999	YER124C	>0.9999	YGR193C	>0.9999	YLR263W	>0.9999
YDR362C	6.9	6.99	7.06	7.03	6.94	6.83	6.97	7.15	6.82	6.97	7.08	7.04	7.14	7.14	7.18	7.28													YMR036C	>0.9999	YPL112C	>0.9999	YGL059W	>0.9999	YNR045W	>0.9999
YDR363W	7.06	7.03	6.4	6.43	6.86	6.78	6.11	6.28	6.84	6.99	6.23	6.2	6.92	6.72	6.18	6.11													YPR144C	>0.9999	YNR043W	>0.9999	YEL029C	>0.9999	YBR233W	>0.9999
YDR363W-A	10.01	10.41	9.16	9.6	10.21	10.21	9.49	9.51	10.62	10.46	9.88	9.91	10.6	10.55	9.61	9.46													YDL030W	>0.9999	YOL103W	>0.9999	YGL056C	>0.9999	YDR363W-A	>0.9999
YDR364C	6.93	6.9	7.3	6.91	6.48	6.59	6.72	6.76	6.61	6.96	7.12	7.08	6.94	6.75	6.78	6.77													YKL069W	>0.9999	YPL162C	>0.9999	YPR054W	>0.9999	YNL038W	>0.9999
YDR365C	9.48	9.28	8.87	8.6	8.34	8.54	7.78	7.93	8.42	9.41	8.41	8.59	8.6	8.36	7.67	7.63													YDL043C	>0.9999	YNR011C	>0.9999	YML109W	>0.9999	YIL113W	>0.9999
YDR366C	4.91	3.45	6.31	6.59	5.69	6.56	7.06	6.48	6.07	3.34	6.27	6.47	4.71	4.54	6.17	5.51													YIL078W	>0.9999	YBR165W	>0.9999	YIR023W	>0.9999	YJR100C	>0.9999
YDR367W	7.51	7.86	8.25	8.35	7.65	8.15	8.42	8.45	7.66	7.67	8.73	8.67	7.7	7.69	8.41	8.35													YMR118C	>0.9999	YDL138W	>0.9999	YJR115W	>0.9999	YIL008W	>0.9999
YDR368W	8.93	9.3	9.3	9.49	9.31	9.52	9.75	9.88	9.24	8.87	9.82	9.74	8.94	9.12	9.85	10.12													YMR263W	>0.9999	YML030W	0.9974	YNL219C	>0.9999	YKR079C	>0.9999
YDR369C	6.09	6.66	6.55	6.47	6.9	6.72	6.21	6.44	6.2	6.62	6.35	5.38	6.63	7.03	6.26	6.47													YDR458C	>0.9999	YNL210W	>0.9999	YNL300W	>0.9999	YPR073C	>0.9999
YDR370C	6.68	6.81	6.93	6.8	6.57	6.68	6.89	6.79	6.84	6.87	6.96	6.94	7.03	6.74	6.74	6.82													YMR120C	>0.9999	YOR207C	>0.9999	YAR028W	>0.9999	YOR162C	>0.9999
YDR371W	5.63	6.19	5.58	6.14	5.51	5.89	5.85	5.73	5.83	5.96	6.38	6.43	5.94	6.04	5.83	5.8													YOR381W	>0.9999	YIL169C	>0.9999	YLR088W	>0.9999	YML094W	>0.9999
YDR372C	9.13	9.07	8.95	9.03	8.98	9.17	9.09	9.1	8.94	9.34	9.3	9.25	9.33	9.17	9.11	9.15													YGR043C	>0.9999	YGL016W	0.9959	YBR230W-A	>0.9999	YDR196C	>0.9999
YDR373W	9.18	9.54	9.05	9.22	9.24	9.15	9.23	9.18	9.57	9.38	9.49	9.54	9.51	9.43	9.1	9.23													YLR347C	>0.9999	YDL113C	0.9997	YIR026C	>0.9999	YCR003W	>0.9999
YDR374C	3.47	3.63	3.11	2.72	4.86	2.58	2.38	2.23	3.17	3.46	1.95	2.51	3.37	3.24	2.52	2.66													YLR341W	>0.9999	YFL009W	>0.9999	YOR389W	>0.9999	YJL084C	>0.9999
YDR375C	7.4	7.47	7.62	7.58	7.62	7.6	7.83	7.66	7.51	7.42	7.54	7.48	7.47	7.49	7.69	7.64													YLR377C	>0.9999	YER114C	>0.9999	YCR031C	>0.9999	YGL094C	>0.9999
YDR376W	6.52	6.76	6.87	6.96	6.66	6.83	7.09	7.09	6.88	6.68	7.05	7.08	6.72	6.92	7.12	7.22													YNL233W	>0.9999	YCL045C	>0.9999	YDL092W	>0.9999	YEL018W	>0.9999
YDR377W	9.4	9.76	9.74	10.09	9.43	9.64	9.98	10.05	10.08	9.65	10.39	10.4	9.26	9.61	10.19	10.07													YPR100W	>0.9999	YOR209C	>0.9999	YIL014C-A	>0.9999	YDL013W	>0.9999
YDR378C	8.54	8.33	8.72	8.73	8.86	8.98	8.85	8.82	9.25	8.46	8.99	8.85	8.92	8.79	8.91	8.89													YOL144W	>0.9999	YMR256C	>0.9999	YEL066W	>0.9999	YAL051W	>0.9999
YDR379C-A	6.32	6.57	6.51	6.8	7.19	7.02	7.6	7.48	7.64	6.58	7.03	6.88	6.57	6.86	7.71	7.62													YMR244C-A	>0.9999	YMR126C	>0.9999	YLR263W	>0.9999	YNL025C	>0.9999
YDR379W	7.8	7.74	7.36	7.49	8.41	8	7.79	7.84	8.14	7.84	7.39	7.23	8.3	8.24	7.78	7.7													YLR419W	>0.9999	YDL204W	>0.9999	YNR045W	0.4244	YPL104W	>0.9999
YDR380W	3.89	3.94	3.96	4.03	4.3	3.89	4.48	4.17	3.45	3.74	3.75	3.92	3.48	3.95	4.44	4.64													YER066W	>0.9999	YDR532C	>0.9999	YBR233W	0.8745	YNL148C	>0.9999
YDR381C-A	7.31	7.81	7.11	7.36	8.17	8.1	7.9	7.52	8.76	7.58	7.34	7.55	8.22	8.4	7.81	7.67													YGR148C	>0.9999	YPL059W	>0.9999	YDR363W-A	>0.9999	YAR050W	>0.9999
YDR381W	10.06	10.04	10.09	10.3	9.86	10.13	10.16	10.2	9.8	9.98	10.59	10.61	9.99	10.04	10.07	10.05													YGR024C	>0.9999	YMR109W	0.3022	YNL038W	>0.9999	YLR413W	0.6244
YDR382W	11.87	12.45	12.18	12.26	11.92	12.02	12.22	12.21	12.14	11.98	12.3	12.31	11.99	12.03	12.27	12.19													YOR367W	>0.9999	YDR481C	>0.9999	YIL113W	>0.9999	YGL143C	>0.9999
YDR383C	7.17	6.89	6.69	6.81	7.44	7.55	6.8	6.71	7.84	7.05	6.75	6.92	6.92	7.12	6.96	6.88													YNL094W	>0.9999	YBR011C	>0.9999	YJR100C	>0.9999	YER161C	>0.9999
YDR384C	9.24	9.07	9.37	8.84	8.52	8.93	8.79	8.34	9.08	8.6	8.28	8.5	7.92	8.22	8.05	7.98													YEL021W	>0.9999	YER096W	0.0732	YIL008W	>0.9999	YML121W	>0.9999
YDR385W	12.74	12.76	12.69	12.68	12.68	12.68	12.64	12.66	12.53	12.75	12.46	12.41	12.66	12.75	12.66	12.64													YPL172C	0.9764	YGR065C	0.987	YKR079C	>0.9999	YPR004C	>0.9999
YDR386W	6.66	6.55	6.2	6.55	6.53	6.29	6.38	6.55	6.8	6.7	6.58	6.51	6.48	6.33	6.44	6.39													YNL081C	>0.9999	YDL008W	0.9136	YPR073C	>0.9999	YGR247W	>0.9999
YDR387C	6.89	7.49	6.98	7.23	7.29	7.23	7.49	7.4	7.45	7.04	7.05	7.13	7.36	7.33	7.49	7.37													YDR225W	>0.9999	YFL068W	>0.9999	YOR162C	>0.9999	YFR036W	>0.9999
YDR388W	10.14	10.22	9.88	10.02	10.26	10.26	10.2	10.15	10.34	10.34	9.98	9.89	10.33	10.43	10.31	10.22													YLR049C	>0.9999	YDR320C	>0.9999	YML094W	>0.9999	YNL049C	>0.9999
YDR389W	7.73	7.63	7.6	7.62	7.66	7.51	7.7	7.62	7.58	7.61	7.54	7.35	7.67	7.58	7.7	7.68													YML111W	>0.9999	YJL179W	0.4422	YDR196C	>0.9999	YDR465C	>0.9999
YDR390C	8.48	8.01	8.41	8.32	8.29	8.39	8.16	8.17	8.25	8.38	8.26	8.35	8.86	8.7	8.13	8.13													YJR114W	>0.9999	YDR002W	>0.9999	YCR003W	>0.9999	YMR280C	>0.9999
YDR391C	6.93	7.24	6.86	7.14	6.93	7.06	7.16	7.1	7.56	6.81	7.12	7.15	6.72	6.96	7.23	7.06													YLR119W	>0.9999	YHR004C	>0.9999	YJL084C	>0.9999	YLR006C	>0.9999
YDR392W	7.38	7.3	7.3	7.37	7.43	7.47	7.41	7.37	7.3	7.25	7.42	7.56	7.35	7.47	7.36	7.37													YDR044W	>0.9999	YLR218C	0.9997	YGL094C	>0.9999	YER037W	>0.9999
YDR393W	6.28	5.81	6.17	6.18	6.43	6.23	6.34	6.05	6.44	6.04	5.96	6.15	6.31	6.14	6.18	6.15													YOR243C	>0.9999	YBR006W	>0.9999	YEL018W	>0.9999	YDR164C	>0.9999
YDR394W	9.3	9.41	9.34	9.34	9.06	9.15	9.25	9.35	9.32	9.29	9.44	9.45	9.11	9	9.35	9.39													YNR030W	>0.9999	YGR193C	>0.9999	YDL013W	>0.9999	YOR020W-A	>0.9999
YDR395W	9.35	9.03	9.26	9.14	8.69	9.15	8.9	8.91	8.85	8.97	8.9	8.81	8.98	8.75	8.77	8.65													YNR047W	>0.9999	YGL059W	0.9984	YAL051W	>0.9999	YDL211C	>0.9999
YDR397C	9.78	9.48	9.53	9.38	9.67	9.82	9.34	9.22	9.96	9.51	9.45	9.44	9.56	9.49	9.18	9.2													YDR046C	>0.9999	YEL029C	0.6726	YNL025C	>0.9999	YER014W	>0.9999
YDR398W	9.71	9.76	9.7	8.91	8.67	9.03	8.15	8.28	9.04	9.57	8.93	8.86	9.04	8.67	8.04	8.05													YMR321C	>0.9999	YGL056C	>0.9999	YPL104W	>0.9999	YML072C	>0.9999
YDR399W	10.57	10.41	10.76	10.59	9.96	10.26	9.97	9.97	10.16	10.74	10.55	10.53	10.19	10.03	9.75	9.72													YDR223W	>0.9999	YPR054W	>0.9999	YNL148C	>0.9999	YKL208W	>0.9999
YDR400W	7.02	6.88	7.44	7.25	6.94	7.08	7.23	7.4	7.14	7.02	7.36	7.36	6.55	6.56	7.49	7.48													YJR085C	>0.9999	YML109W	>0.9999	YAR050W	>0.9999	YPR153W	>0.9999
YDR402C	4.99	3.91	4.23	4.13	5.17	4.46	4.32	4.52	4.78	4.03	3.49	3.72	3.82	3.92	4.93	4.62													YDR169C	>0.9999	YIR023W	0.1343	YLR413W	>0.9999	YKL100C	>0.9999
YDR403W	4.1	4.39	4.1	3.98	4.2	4.06	4.47	4.15	4.64	4.56	4.47	4.5	3.98	4.19	4.47	4.54													YDR334W	>0.9999	YNL219C	>0.9999	YGL143C	>0.9999	YDR415C	>0.9999
YDR404C	9.23	9.13	9.24	9.26	9.08	9.11	9.24	9.23	8.76	9.3	9.34	9.36	9.35	9.23	9.1	9.12													YDL057W	>0.9999	YNL300W	>0.9999	YER161C	>0.9999	YOL055C	>0.9999
YDR405W	7.68	7.91	7.62	7.68	8.18	8.22	7.74	7.63	7.97	7.74	7.52	7.68	7.99	8.11	7.67	7.72													YKR094C	>0.9999	YAR028W	>0.9999	YML121W	>0.9999	YER148W	>0.9999
YDR406W	6.54	7.68	6.46	6.52	7.67	7.38	6.93	6.78	7.13	7.04	6.27	6.07	7.22	7.25	6.78	6.83													YOR347C	>0.9999	YLR088W	>0.9999	YPR004C	>0.9999	YLR100W	>0.9999
YDR407C	8.31	8.37	8.11	8.26	8.41	8.21	8.25	8.33	8.16	8.22	8.12	8.05	8.57	8.4	8.2	8.22													YER062C	>0.9999	YBR230W-A	0.3022	YGR247W	>0.9999	YNL224C	>0.9999
YDR408C	9.06	9.11	10.02	9.83	9.44	9.68	10.18	9.99	9.47	8.83	9.95	9.93	9.52	9.77	9.96	9.93													YGL243W	>0.9999	YIR026C	0.999	YFR036W	>0.9999	YOR177C	0.9903
YDR409W	6.54	6.19	6.68	6.65	7.12	6.5	6.77	6.83	6.83	6.53	5.95	5.94	6.62	6.58	6.79	6.62													YPL212C	>0.9999	YOR389W	0.2556	YNL049C	>0.9999	YOL159C	>0.9999
YDR410C	6.52	7.01	6.79	7.06	6.74	6.81	7.02	6.8	6.89	6.69	7.1	7.23	6.83	6.73	6.93	6.88													YMR182C	>0.9999	YCR031C	>0.9999	YDR465C	>0.9999	YJR070C	>0.9999
YDR411C	7.98	8.17	7.9	8.21	8.32	8.08	8.23	8.23	8.13	7.98	8.16	8.11	8.19	8.37	8.26	8.25													YGL003C	>0.9999	YDL092W	>0.9999	YMR280C	>0.9999	YKL056C	>0.9999
YDR412W	8.13	7.81	8.04	7.7	7.29	7.64	7.09	7.2	7.04	8.31	7.98	8.05	7.55	7.61	7.1	7													YGL006W-A	>0.9999	YIL014C-A	0.1627	YLR006C	>0.9999	YPR068C	>0.9999
YDR414C	6.65	6.49	7.36	7.3	6.73	6.87	7.33	7.26	6.72	6.79	7.11	7.24	7.04	7.01	7.17	7.22													YGR178C	>0.9999	YEL066W	>0.9999	YER037W	>0.9999	YBR167C	>0.9999
YDR415C	7.61	7.76	7.74	7.91	7.65	7.82	7.87	7.79	7.6	7.59	7.75	7.75	7.41	7.39	7.89	7.92													YGR286C	>0.9999	YLR263W	0.6726	YDR164C	>0.9999	YML049C	>0.9999
YDR416W	6.05	6.27	6.41	6.18	5.84	5.78	5.81	5.88	6.08	6.03	6.19	6.24	6.25	6.1	6.07	5.95													YLR243W	>0.9999	YNR045W	>0.9999	YOR020W-A	>0.9999	YOR106W	>0.9999
YDR418W	11.76	11.51	12.1	12.07	11.79	11.79	12.1	12.16	11.77	11.78	12.11	12.08	11.72	11.74	12.12	12.08													YIL004C	>0.9999	YBR233W	>0.9999	YDL211C	>0.9999	YFL040W	>0.9999
YDR419W	5.95	6	6.39	6.29	6.04	5.91	6.31	6.45	6.3	5.71	6.08	5.93	5.88	5.81	6.36	6.3													YPL101W	>0.9999	YDR363W-A	0.8243	YER014W	>0.9999	YML078W	>0.9999
YDR420W	8.86	9.28	8.84	8.67	9.17	8.66	8.82	8.75	8.84	9.04	8.37	8.13	9.12	8.92	8.75	8.68													YEL075C	>0.9999	YNL038W	0.9994	YML072C	>0.9999	YNL015W	0.9734
YDR421W	6.85	7.02	6.68	6.67	6.82	6.53	6.81	6.76	6.78	6.86	6.8	6.82	6.88	6.88	6.74	6.75													YNL024C-A	>0.9999	YIL113W	>0.9999	YKL208W	>0.9999	YDL140C	>0.9999
YDR422C	7.28	7.39	7.32	7.42	7.23	7.26	7.43	7.15	7.34	7.14	7.15	6.97	6.75	7	7.23	7.12													YLR208W	>0.9999	YJR100C	>0.9999	YPR153W	>0.9999	YER056C	>0.9999
YDR423C	7.52	7.69	7.14	7.11	7.58	7.36	7.36	7.3	7.79	7.48	7.16	7.27	7.6	7.47	7.5	7.39													YMR259C	>0.9999	YIL008W	>0.9999	YKL100C	>0.9999	YLL019C	>0.9999
YDR424C	8.51	8.61	8.36	8.61	9.17	9	8.89	8.76	9.24	8.67	8.67	8.51	9.05	9.09	8.9	8.66													YEL047C	>0.9999	YKR079C	>0.9999	YDR415C	>0.9999	YLR405W	>0.9999
YDR425W	6.33	6.37	6.29	6.54	6.43	6.27	6.65	6.52	6.31	6.51	6.4	6.38	6.58	6.44	6.52	6.7													YOR224C	>0.9999	YPR073C	0.7371	YOL055C	>0.9999	YDR318W	>0.9999
YDR427W	9.05	8.87	9.08	9.19	8.76	9.03	9.13	9.09	9.04	8.98	9.54	9.54	8.84	8.82	9.06	9.12													YNL139C	>0.9999	YOR162C	>0.9999	YOL140W	>0.9999	YKR061W	>0.9999
YDR428C	7.47	7.53	7.34	7.2	7.44	7.85	7.33	7.33	7.52	7.44	7.31	7.42	7.29	7.46	7.35	7.42													YNR036C	>0.9999	YML094W	>0.9999	YER148W	0.9936	YIR009W	>0.9999
YDR429C	10.71	10.43	10.46	10.45	10.42	10.48	10.18	10.04	10.3	10.78	10.51	10.56	10.29	10.39	10.05	10.1													YDR494W	>0.9999	YDR196C	0.9938	YLR100W	>0.9999	YBL080C	>0.9999
YDR430C	7.26	7.41	7.12	7.29	7.6	7.44	7.11	6.91	7.61	7.46	6.75	6.69	7.27	7.27	7.02	6.93													YOL098C	>0.9999	YCR003W	>0.9999	YNL224C	>0.9999	YOR093C	>0.9999
YDR432W	11.29	11.98	10.92	11.1	10.98	11.05	10.75	10.8	11.16	11.43	10.96	10.96	11.09	11.28	10.87	10.76													YJL068C	>0.9999	YJL084C	>0.9999	YOR177C	>0.9999	YLR271W	>0.9999
YDR434W	8.24	8.14	8.45	8.52	8.03	8.32	8.34	8.49	8.36	8.05	8.57	8.62	8.44	8.41	8.37	8.41													YLR466C-B	>0.9999	YGL094C	>0.9999	YOL159C	>0.9999	YNL056W	>0.9999
YDR435C	6.46	6.99	7.18	7.17	6.76	7.08	7.5	7.43	7.07	6.46	7.11	7.18	6.83	6.99	7.52	7.58													YHR186C	>0.9999	YEL018W	>0.9999	YJR070C	>0.9999	YOR279C	>0.9999
YDR436W	5.8	6.52	6.02	6.21	6.07	6.14	6.2	6.08	6.37	6.07	5.92	6.03	6.16	6.29	6.14	6.26													YDR270W	>0.9999	YDL013W	>0.9999	YKL056C	>0.9999	YGL207W	>0.9999
YDR437W	4.73	4.3	5.07	5.12	4.73	4.89	4.83	5.18	4.14	4.44	5.06	5.16	4.87	4.82	5.06	4.93													YCL037C	>0.9999	YAL051W	0.6726	YPR068C	>0.9999	YKL029C	>0.9999
YDR438W	5.91	5.98	5.88	5.85	6.27	5.77	6.05	6.05	6.11	5.83	5.34	5.31	6.09	5.94	6.02	5.95													YOL021C	>0.9999	YNL025C	>0.9999	YBR167C	>0.9999	YBR057C	>0.9999
YDR439W	6.66	6.99	6.45	6.6	6.81	6.63	6.42	6.41	6.55	6.79	6.46	6.51	6.78	6.73	6.56	6.45													YPL245W	>0.9999	YPL104W	>0.9999	YML049C	>0.9999	YOL166W-A	>0.9999
YDR440W	7.95	7.91	7.78	7.69	7.65	7.53	7.22	7.58	7.68	8.01	7.83	7.87	7.96	7.83	7.43	7.59													YOR363C	>0.9999	YNL148C	>0.9999	YOR106W	>0.9999	YLR325C	>0.9999
YDR441C	7.98	8.37	8.4	7.95	7.34	7.71	7.67	8.13	8.14	8.22	8.22	8.03	7.68	7.67	8.2	8.25													YBL001C	>0.9999	YAR050W	0.967	YML078W	>0.9999	YMR036C	>0.9999
YDR443C	6.93	6.94	6.86	6.88	6.91	6.83	6.98	7.04	6.78	6.81	6.31	6.03	6.91	6.6	7.02	6.99													YML067C	>0.9999	YGL143C	>0.9999	YNL015W	>0.9999	YPR144C	>0.9999
YDR444W	7.65	7.91	7.31	7.34	7.79	7.43	7.25	7.19	7.39	7.53	7.42	7.49	7.88	8.02	7.33	7.34													YBR208C	>0.9999	YER161C	>0.9999	YDL140C	>0.9999	YDL030W	>0.9999
YDR446W	3.45	3.23	3.11	2.68	3.96	2.85	2.71	3.07	2.69	3.13	2.78	2.73	2.34	2.81	3.01	3.02													YOL089C	>0.9999	YML121W	>0.9999	YER056C	>0.9999	YKL069W	>0.9999
YDR447C	11.24	11.35	11.58	11.55	11.4	11.5	11.53	11.46	11.24	11.26	11.83	11.87	11.15	11.5	11.55	11.6													YMR037C	>0.9999	YPR004C	>0.9999	YLL019C	0.3159	YDL043C	>0.9999
YDR447C	11.69	11.76	11.74	11.86	11.92	12.01	11.95	11.83	12.01	11.77	11.92	11.95	11.64	11.83	11.88	11.82													YDR540C	>0.9999	YGR247W	0.999	YLR405W	>0.9999	YIL078W	>0.9999
YDR448W	7.15	7.02	7.1	7.07	6.93	6.87	6.78	7.05	6.78	7.22	7.35	7.25	7.39	7.46	6.94	6.98													YGR109W-A	>0.9999	YFR036W	>0.9999	YDR318W	>0.9999	YMR118C	0.5235
YDR449C	8.87	8.76	9.02	8.5	7.68	8.32	7.84	7.92	7.83	8.75	8.7	8.76	8.18	7.61	7.57	7.45													YNL118C	>0.9999	YNL049C	>0.9999	YKR061W	>0.9999	YMR263W	>0.9999
YDR450W	11.98	11.92	12.08	12.07	11.97	12.06	12.14	12.1	12	12.01	12.16	12.19	11.9	11.96	12.11	12.03													YGL001C	>0.9999	YDR465C	0.999	YIR009W	>0.9999	YDR458C	>0.9999
YDR451C	7.86	7.53	7.4	7.84	7.53	7.51	7.71	7.77	7.21	7.66	8.02	8	7.76	7.57	7.78	7.66													YML048W	>0.9999	YMR280C	>0.9999	YBL080C	>0.9999	YMR120C	>0.9999
YDR452W	9.92	10.09	9.51	9.8	10.14	10.05	9.7	9.71	10.14	9.85	9.45	9.2	10.23	10.19	9.78	9.73													YPL030W	>0.9999	YLR006C	>0.9999	YOR093C	0.3412	YOR381W	0.9946
YDR453C	5.55	6.11	5.48	5.59	5.27	5.68	5.67	5.6	7.51	5.75	5.68	5.72	4.57	5.26	5.92	5.59													YJR010C-A	>0.9999	YDR164C	>0.9999	YLR271W	>0.9999	YGR043C	0.5737
YDR454C	10.56	10.84	10.85	10.89	10.78	10.87	10.93	10.99	10.84	10.61	11.2	11.14	10.67	10.79	11.08	11													YLR127C	>0.9999	YOR020W-A	0.0997	YNL056W	>0.9999	YLR347C	>0.9999
YDR456W	8.37	8.76	8.57	8.65	8.91	8.84	8.98	8.86	8.7	8.55	8.52	8.42	8.75	8.78	8.92	8.87													YJL153C	>0.9999	YDL211C	>0.9999	YOR279C	>0.9999	YLR341W	>0.9999
YDR457W	10.2	10.66	9.9	9.76	10.46	10.09	9.78	9.76	10.31	10.24	9.47	9.35	10.7	10.45	9.73	9.72													YOR303W	>0.9999	YER014W	>0.9999	YGL207W	>0.9999	YLR377C	>0.9999
YDR458C	7.35	7.36	7.38	7.54	7.42	7.34	7.36	7.27	7.32	7.42	7.52	7.6	7.58	7.56	7.3	7.29													YMR279C	>0.9999	YML072C	0.999	YKL029C	>0.9999	YNL233W	>0.9999
YDR459C	6.76	6.91	6.7	6.89	7.02	6.96	6.95	6.92	6.96	6.83	6.91	7.04	7.26	7.16	6.99	6.86													YDR254W	>0.9999	YKL208W	>0.9999	YBR057C	>0.9999	YPR100W	>0.9999
YDR460W	7.03	7.06	7.14	7.13	7.01	6.97	7.11	7.12	6.93	7.12	7.14	7.08	7	6.89	6.98	7													YER038C	>0.9999	YPR153W	>0.9999	YOL166W-A	>0.9999	YOL144W	>0.9999
YDR461W	5.29	5.67	4.87	4.88	5.83	5.73	5.15	4.99	5.91	5.39	4.75	4.96	5.32	5.44	4.87	4.77													YDL195W	>0.9999	YKL100C	>0.9999	YLR325C	>0.9999	YMR244C-A	>0.9999
YDR462W	7.5	7.91	7.56	7.75	7.67	7.94	7.7	7.67	7.76	7.62	7.77	7.79	7.53	7.73	7.71	7.67													YKL081W	>0.9999	YDR415C	>0.9999	YMR036C	>0.9999	YLR419W	>0.9999
YDR463W	8.57	8.53	8.72	8.57	8.42	8.35	8.56	8.62	8.33	8.69	8.5	8.43	8.49	8.46	8.53	8.47													YFL017C	>0.9999	YOL055C	>0.9999	YPR144C	>0.9999	YER066W	>0.9999
YDR464W	8.28	8.15	7.83	7.75	7.98	7.67	7.44	7.51	7.66	8.14	7.53	7.58	8.28	8.07	7.43	7.55													YMR261C	>0.9999	YER148W	>0.9999	YDL030W	>0.9999	YGR148C	>0.9999
YDR465C	9.52	9.49	9.65	9.06	8.73	9.01	8.51	8.63	9.06	9.34	8.87	8.98	8.99	8.48	8.43	8.29													YOR144C	0.056	YLR100W	>0.9999	YKL069W	>0.9999	YGR024C	>0.9999
YDR466W	8.31	8.9	7.89	7.83	8.49	8.13	7.79	7.83	8.29	8.23	7.66	7.72	8.31	8.25	7.82	7.81													YKL106C-A	>0.9999	YNL224C	>0.9999	YDL043C	>0.9999	YOR367W	>0.9999
YDR468C	8.22	8.33	8.2	8.15	8.27	8.2	8.14	8.23	8.07	8.47	8.58	8.13	8.31	8.36	8.16	8.31													YGR204W	>0.9999	YOR177C	>0.9999	YIL078W	>0.9999	YNL094W	>0.9999
YDR469W	8.39	8.04	7.94	7.89	8.14	8.46	7.93	7.76	8.26	8.58	8.31	8.29	8.57	8.42	7.88	7.98													YJL198W	>0.9999	YOL159C	>0.9999	YMR118C	>0.9999	YEL021W	>0.9999
YDR470C	6.39	6.48	6.47	6.56	6.56	6.58	6.71	6.75	6.41	6.39	6.5	6.43	6.58	6.57	6.72	6.7													YDR033W	>0.9999	YJR070C	>0.9999	YMR263W	>0.9999	YPL172C	>0.9999
YDR471W	11.49	11.29	11.75	11.66	11.29	11.36	11.64	11.71	11.17	11.58	11.79	11.77	11.48	11.52	11.64	11.63													YPR161C	>0.9999	YKL056C	>0.9999	YDR458C	>0.9999	YNL081C	>0.9999
YDR472W	7.11	7.44	7.67	7.64	7.09	7.41	7.57	7.56	7.24	6.95	7.44	7.52	7.19	7.15	7.53	7.4													YPL140C	>0.9999	YPR068C	>0.9999	YMR120C	>0.9999	YDR225W	>0.9999
YDR473C	7.44	7.43	7.2	7.09	7.35	7.12	6.93	6.95	7.08	7.53	7.12	7.11	7.4	7.33	7.02	7.02													YIL109C	>0.9999	YBR167C	>0.9999	YOR381W	>0.9999	YLR049C	>0.9999
YDR475C	7.97	8.32	7.57	7.98	8.82	8.47	8.34	8.34	8.45	7.95	7.85	7.75	8.87	8.65	8.39	8.36													YJR073C	>0.9999	YML049C	>0.9999	YGR043C	0.6469	YML111W	>0.9999
YDR476C	7.34	7.64	7.68	7.51	7.67	7.65	7.75	7.74	8.02	7.48	7.59	7.56	7.88	7.88	7.96	7.96													YPR171W	>0.9999	YOR106W	>0.9999	YLR347C	>0.9999	YJR114W	0.8137
YDR477W	8.23	8.37	8.45	8.52	8.11	8.2	8.41	8.53	7.81	8.19	8.42	8.26	8.04	8.17	8.31	8.31													YJR004C	>0.9999	YML078W	>0.9999	YLR377C	>0.9999	YLR119W	>0.9999
YDR478W	7.69	7.82	7.02	6.91	6.85	7.31	6.44	6.56	6.95	7.62	7.19	7.3	7.29	7.24	6.59	6.5													YDL215C	0.8033	YNL015W	0.3047	YNL233W	>0.9999	YDR044W	>0.9999
YDR479C	6.49	6.79	6.63	6.66	6.82	6.8	7.12	7.29	7.09	6.68	6.9	6.78	7.29	7.32	7.18	7.09													YDR402C	>0.9999	YER056C	>0.9999	YPR100W	>0.9999	YOR243C	>0.9999
YDR480W	6.05	6	6.03	6.16	5.88	5.96	6.19	6.4	5.33	5.95	6.17	6.21	6.01	5.92	6.44	6.49													YPL092W	>0.9999	YLL019C	0.0542	YMR244C-A	>0.9999	YNR030W	>0.9999
YDR481C	10.23	9.32	9.66	9.8	9.37	10.07	9.14	9.89	10.3	10.21	9.58	9.46	10.31	9.89	9.76	9.93													YDL224C	>0.9999	YLR405W	>0.9999	YLR419W	>0.9999	YNR047W	>0.9999
YDR482C	6.47	6.5	6.41	6.24	6.88	6.74	6.5	6.33	6.75	6.55	6.4	6.35	6.82	6.88	6.5	6.41													YDR174W	>0.9999	YDR318W	>0.9999	YER066W	>0.9999	YDR223W	>0.9999
YDR483W	10	10.19	10.39	10.41	10.31	10.45	10.48	10.54	10.66	10.15	10.4	10.37	10.32	10.37	10.62	10.62													YLR060W	>0.9999	YKR061W	>0.9999	YGR148C	>0.9999	YJR085C	>0.9999
YDR484W	6.51	6.19	6.69	6.71	6.49	6.36	6.76	6.82	5.79	6.46	6.82	6.33	6.87	6.66	6.55	6.7													YJL159W	>0.9999	YIR009W	>0.9999	YGR024C	>0.9999	YDR169C	>0.9999
YDR485C	7.59	7.61	7.33	7.3	7.47	7.14	7.21	7.29	7.01	7.62	7.02	7.01	7.5	7.41	7.19	7.14													YPL109C	>0.9999	YBL080C	>0.9999	YOR367W	>0.9999	YDR334W	>0.9999
YDR486C	7.92	7.78	7.67	7.83	7.77	7.88	7.8	7.78	8.17	7.97	8.01	8	7.77	8.01	7.79	7.82													YGL175C	>0.9999	YOR093C	>0.9999	YNL094W	>0.9999	YDL057W	>0.9999
YDR487C	9.59	9.96	9.89	9.88	9.79	9.99	10.18	9.89	9.82	9.76	9.94	9.92	9.79	10.05	9.88	9.9													YDR472W	>0.9999	YLR271W	0.229	YPL172C	>0.9999	YKR094C	>0.9999
YDR488C	6.76	7.79	6.34	6.48	6.99	6.89	6.28	6.26	7.07	7.01	6.36	6.36	7.04	7.29	6.46	6.57													YMR168C	>0.9999	YNL056W	0.9946	YNL081C	>0.9999	YOR347C	>0.9999
YDR489W	5.99	6.31	6.52	6.51	5.83	5.93	6.39	6.33	6.02	5.91	6.32	6.33	5.58	5.64	6.42	6.35													YDR468C	>0.9999	YOR279C	>0.9999	YDR225W	>0.9999	YER062C	>0.9999
YDR490C	7.37	8.03	7.2	7.49	8.16	7.67	7.55	7.51	7.86	7.48	7.52	7.37	7.68	7.98	7.63	7.62													YGL021W	>0.9999	YGL207W	>0.9999	YLR049C	>0.9999	YGL243W	>0.9999
YDR492W	8.76	8.27	8.85	8.43	8.77	8.56	8.23	8.23	8.38	8.65	8.21	8.24	8.59	8.37	8.18	8.15													YJL108C	>0.9999	YBR057C	>0.9999	YML111W	>0.9999	YPL212C	>0.9999
YDR493W	6.75	7.03	7.06	7.07	7	7.24	7.33	7.22	6.67	7.04	7.39	7.34	7.07	7.24	7.21	7.16													YGL077C	>0.9999	YLR325C	0.9994	YJR114W	>0.9999	YMR182C	>0.9999
YDR494W	7.89	7.82	7.81	7.85	8.03	8.08	7.92	7.88	7.57	7.91	7.8	7.76	8.02	7.96	7.86	7.79													YIL085C	>0.9999	YMR036C	>0.9999	YLR119W	>0.9999	YGL003C	>0.9999
YDR495C	7.55	7.53	7.39	7.42	7.21	7.14	7.4	7.45	7.33	7.44	7.35	7.25	7.48	7.17	7.33	7.35													YDR485C	>0.9999	YPR144C	0.5369	YDR044W	>0.9999	YGL006W-A	>0.9999
YDR496C	10.36	10.04	10.33	9.56	9.26	9.57	9.11	9.06	9.35	10.31	9.66	9.73	9.81	9.45	8.78	8.73													YMR174C	>0.9999	YDL030W	>0.9999	YOR243C	>0.9999	YGR178C	>0.9999
YDR497C	11.93	11.95	11.51	11.8	11.89	11.63	11.52	11.75	12.16	11.67	11.8	11.75	11.93	11.95	11.85	11.8													YHL039W	>0.9999	YKL069W	0.9646	YNR030W	>0.9999	YGR286C	>0.9999
YDR498C	7.17	6.87	7.26	7.09	7.22	7.26	7.42	7.41	7.22	7.16	6.96	7.09	7.26	7.25	7.46	7.44													YOR163W	>0.9999	YDL043C	>0.9999	YNR047W	>0.9999	YLR243W	>0.9999
YDR499W	6.81	6.63	6.49	6.61	6.8	6.55	6.52	6.56	6.43	6.87	6.56	6.56	7.14	6.95	6.54	6.53													YGL179C	>0.9999	YIL078W	>0.9999	YDR046C	>0.9999	YIL004C	>0.9999
YDR500C	12.15	12.13	12.03	12.06	12.22	12.26	12.11	12.16	12.19	12.28	12.19	12.11	12.14	12.15	12.25	12.03													YIL124W	>0.9999	YMR118C	>0.9999	YMR321C	>0.9999	YPL101W	>0.9999
YDR501W	5.12	5	5.01	5.09	5.12	4.86	5.14	5.07	3.99	5.14	5.16	5.1	4.8	4.79	5.05	5.15													YBR021W	>0.9999	YMR263W	0.8999	YDR223W	>0.9999	YEL075C	>0.9999
YDR502C	12.55	12.43	12.14	12.37	12.16	12.2	12.01	12.26	12.39	12.35	12.36	12.29	12.15	12.03	12.24	12.25													YNL294C	>0.9999	YDR458C	>0.9999	YJR085C	>0.9999	YNL024C-A	>0.9999
YDR503C	5.2	5.36	5.49	5.71	5.57	5.43	6.01	5.96	5.29	5.17	5.82	5.77	5.25	5.31	6.08	6.1													YMR071C	>0.9999	YMR120C	>0.9999	YDR169C	>0.9999	YLR208W	>0.9999
YDR504C	9.59	8.43	10.03	10.97	10.41	9.81	10.52	9.85	11.37	8.8	8.69	8.67	9.04	9.34	10.13	11.21													YOL105C	>0.9999	YOR381W	>0.9999	YDR334W	0.5489	YMR259C	>0.9999
YDR505C	8.3	8.13	8.52	8.52	8.33	8.18	8.6	8.6	8.18	8.21	8.26	8.09	8.09	8.03	8.5	8.55													YDL125C	>0.9999	YLR347C	0.9997	YDL057W	>0.9999	YEL047C	>0.9999
YDR506C	6.71	6.6	6.43	6.39	6.27	6.16	6.13	6.27	5.94	6.61	6.1	6.13	6.3	6.31	6.15	6.19													YBR039W	>0.9999	YLR341W	>0.9999	YKR094C	>0.9999	YOR224C	>0.9999
YDR507C	8.5	8.01	8.27	8.34	8.74	8.54	8.21	8.29	8.15	8.54	8.24	8.06	8.53	8.31	8.25	8.23													YDR272W	>0.9999	YLR377C	>0.9999	YOR347C	0.9972	YNL139C	>0.9999
YDR508C	11.81	11.85	11.63	11.71	11.26	11.34	11.36	11.35	11.59	11.6	11.32	11.26	11.28	11.32	11.14	11.16													YGL180W	>0.9999	YNL233W	>0.9999	YER062C	0.3955	YNR036C	>0.9999
YDR510W	10.94	11.61	10.61	10.74	10.85	10.86	10.71	10.83	10.73	11.36	11.34	11.29	11.48	11.39	10.82	10.82													YKR100C	>0.9999	YPR100W	>0.9999	YGL243W	>0.9999	YDR494W	>0.9999
YDR511W	8.12	8.69	7.61	8.1	8.56	8.82	8.23	8.01	8.11	8.3	8.37	8.31	8.37	8.63	8.15	8.17													YDR182W-A	>0.9999	YMR244C-A	0.9917	YPL212C	>0.9999	YOL098C	>0.9999
YDR512C	7.94	7.63	7.41	7.73	7.98	8.19	7.73	7.73	8.21	8.16	7.89	7.9	8.24	8.1	7.5	7.48													YBR085C-A	>0.9999	YLR419W	0.3334	YGL003C	>0.9999	YJL068C	>0.9999
YDR513W	9.8	9.92	9.7	10.28	10.01	10.1	10.27	10.26	10	9.82	10.4	10.03	9.42	9.77	10.01	9.95													YBR096W	>0.9999	YER066W	>0.9999	YGL006W-A	>0.9999	YLR466C-B	>0.9999
YDR514C	7.63	7.18	7.8	7.44	6.83	6.82	7.12	7.33	6.38	7.51	7.55	7.66	7.42	7.13	7.14	7.08													YEL007W	>0.9999	YGR148C	>0.9999	YGR178C	>0.9999	YHR186C	>0.9999
YDR515W	6.34	5.98	6.48	6.27	5.84	6.05	5.76	6.1	6.07	6.66	6.8	6.71	6.32	6.14	5.97	6.19													YER093C-A	>0.9999	YGR024C	0.998	YLR243W	0.9998	YDR270W	>0.9999
YDR516C	7.8	8.21	7.45	8.06	8.63	8.78	8.07	7.78	8.58	7.69	7.85	7.74	7.95	8.63	7.83	7.87													YGL011C	>0.9999	YOR367W	>0.9999	YIL004C	>0.9999	YCL037C	>0.9999
YDR517W	8.57	8.64	8.63	8.79	8.82	8.81	8.9	8.79	9.32	8.53	8.8	8.93	8.85	9.02	8.83	8.84													YNL006W	>0.9999	YNL094W	0.9994	YPL101W	>0.9999	YOL021C	>0.9999
YDR518W	7.73	7.99	7.78	7.85	8.19	8.09	8.16	8.23	8	7.86	8.06	7.94	8.14	8.19	8.3	8.4													YGR255C	>0.9999	YPL172C	>0.9999	YEL075C	>0.9999	YPL245W	>0.9999
YDR519W	8.85	9.16	8.84	9.11	9.24	9.31	9.14	9.05	9.39	8.94	9.29	9.34	8.81	8.88	9.17	9.21													YBR139W	>0.9999	YNL081C	>0.9999	YNL024C-A	>0.9999	YOR363C	>0.9999
YDR520C	6.9	7.23	7.14	7.01	6.76	6.86	7.06	6.93	6.91	7.06	6.8	6.81	7.17	6.96	6.99	7.04													YGR187C	>0.9999	YDR225W	>0.9999	YLR208W	>0.9999	YBL001C	>0.9999
YDR522C	3.17	3.59	3.35	3.11	3.64	3.34	3.13	3.05	2.9	2.91	2.93	3.13	2.77	3.25	3.23	3.29													YMR217W	>0.9999	YLR049C	0.6496	YMR259C	>0.9999	YML067C	>0.9999
YDR523C	3.89	4.43	4.2	4.04	4.95	4.2	4.29	4.13	3.94	4.23	3.95	3.91	4.31	4.34	4.24	4.08													YBR095C	>0.9999	YML111W	>0.9999	YEL047C	>0.9999	YBR208C	0.8529
YDR524C	7.1	6.58	7.59	7.3	6.93	6.88	7.36	7.37	6.99	6.92	7.3	7.23	6.98	6.95	7.33	7.32													YLR456W	>0.9999	YJR114W	>0.9999	YOR224C	>0.9999	YOL089C	>0.9999
YDR524C-B	13.13	13.06	12.92	13.02	13.22	13.2	13.07	13.04	13.2	13.15	12.93	12.92	13.13	13.16	13.11	13.01													YGL262W	>0.9999	YLR119W	>0.9999	YNL139C	>0.9999	YMR037C	>0.9999
YDR524W-A	9.52	7.04	8.52	7.72	8.79	9.22	8.58	8.64	10.24	6.4	6.58	7.17	6.87	6.94	8.08	7.75													YHR010W	>0.9999	YDR044W	>0.9999	YNR036C	>0.9999	YDR540C	0.9987
YDR525W-A	8.81	8.46	8.75	8.95	9.4	9.35	9.5	9.32	9.93	9.09	9.08	8.94	8.95	9.08	9.65	9.49													YDL098C	>0.9999	YOR243C	0.8505	YDR494W	>0.9999	YGR109W-A	>0.9999
YDR527W	9.31	9.47	8.93	8.72	8.89	9.01	8.51	8.54	8.97	9.31	8.77	8.84	9.31	9.25	8.4	8.44													YNL293W	>0.9999	YNR030W	>0.9999	YOL098C	>0.9999	YNL118C	>0.9999
YDR528W	8.23	8.05	7.65	8.12	8.86	8.46	8.1	8.25	8.25	8.78	8.32	8.19	8.56	8.85	8.22	7.86													YLR306W	>0.9999	YNR047W	>0.9999	YJL068C	>0.9999	YGL001C	>0.9999
YDR529C	11.6	11.5	11.11	11.39	11.55	11.48	11.2	11.35	11.82	11.63	11.55	11.45	11.56	11.67	11.43	11.26													YOL061W	>0.9999	YDR046C	>0.9999	YLR466C-B	0.9444	YML048W	>0.9999
YDR530C	7.1	7.17	7.52	7.42	7.43	7.63	7.65	7.8	8.16	7.03	7.35	7.36	7.12	7.49	7.89	7.99													YLR055C	>0.9999	YMR321C	>0.9999	YHR186C	>0.9999	YPL030W	>0.9999
YDR531W	8.95	8.93	9.02	9.06	8.79	9.05	9.19	8.95	9.41	8.8	9.09	9.16	8.8	8.6	8.88	8.86													YPL021W	>0.9999	YDR223W	>0.9999	YDR270W	>0.9999	YJR010C-A	>0.9999
YDR532C	6.12	5.72	5.72	5.94	5.92	6.07	5.65	5.68	5.79	6.36	6.2	6.17	6.42	6.56	5.44	5.62													YKL152C	>0.9999	YJR085C	0.3334	YCL037C	>0.9999	YLR127C	>0.9999
YDR533C	7.99	9.46	8.78	8.87	8.37	8.93	9.64	9.26	9.78	8.44	9.45	9.08	7.96	8.55	9.38	9.11													YBR252W	>0.9999	YDR169C	0.9967	YOL021C	>0.9999	YMR279C	>0.9999
YDR534C	4.69	5.07	4.8	4.67	5.15	4.55	4.98	5.09	4.53	4.85	4.45	4.46	4.97	4.74	5.02	4.88													YGL073W	>0.9999	YDR334W	>0.9999	YPL245W	>0.9999	YDR254W	>0.9999
YDR536W	3.51	3.09	3.32	3.23	3.78	3.71	3.33	3.17	3.23	3.21	3.31	3.59	3.04	3	2.92	3.48													YJL072C	>0.9999	YDL057W	>0.9999	YOR363C	>0.9999	YER038C	>0.9999
YDR538W	6.57	6.65	6.75	6.76	6.57	6.75	6.68	6.94	6.12	6.78	6.45	6.46	6.75	6.58	6.97	7.02													YDL045C	>0.9999	YKR094C	>0.9999	YBL001C	>0.9999	YDL195W	>0.9999
YDR539W	7.43	7.93	7.44	7.35	7.26	7.59	7.23	7.61	7.7	7.64	7.54	7.51	7.53	7.73	7.81	7.84													YKL124W	>0.9999	YOR347C	>0.9999	YML067C	>0.9999	YKL081W	>0.9999
YDR540C	5.34	5.41	5.04	5.05	6.08	5.6	5.61	5.35	5.75	5.82	5.38	5.37	5.52	5.41	5.78	5.88													YML104C	>0.9999	YER062C	>0.9999	YBR208C	>0.9999	YFL017C	>0.9999
YDR541C	6.63	7	6.35	6.45	6.88	7.05	6.81	6.86	6.98	7.03	6.79	6.59	7.28	7.29	7.17	6.98													YBL007C	>0.9999	YGL243W	>0.9999	YOL089C	>0.9999	YMR261C	>0.9999
YEL001C	8.8	9.16	9.04	9.27	9.16	9.23	9.43	9.39	9.57	8.79	9.32	9.34	9.12	9.09	9.47	9.19													YMR225C	>0.9999	YPL212C	>0.9999	YMR037C	>0.9999	YOR144C	>0.9999
YEL002C	10.12	10.25	10.34	10.43	10.31	10.31	10.5	10.5	10.37	10.23	10.3	10.31	10.56	10.5	10.47	10.46													YDR307W	>0.9999	YGL003C	>0.9999	YDR540C	>0.9999	YKL106C-A	>0.9999
YEL002C	10.06	10.21	10.32	10.41	10.33	10.33	10.5	10.44	10.41	10.14	10.28	10.27	10.52	10.51	10.49	10.43													YOL115W	>0.9999	YGR178C	>0.9999	YNL118C	>0.9999	YGR204W	>0.9999
YEL002C	8.41	8.04	9.02	9.13	8.32	8.52	9.09	9.13	7.96	7.93	9.04	8.91	8.16	8.36	9.02	9													YGR109W-B	>0.9999	YGR286C	0.9875	YGL001C	>0.9999	YJL198W	>0.9999
YEL002C	8.9	9	9.21	9.3	8.96	9.09	9.25	9.35	8.8	8.83	9.31	9.36	9.18	9.34	9.25	9.31													YLR152C	>0.9999	YLR243W	>0.9999	YML048W	>0.9999	YDR033W	>0.9999
YEL003W	8.65	8.63	8.32	8.57	8.72	8.79	8.33	8.37	8.66	8.87	9.05	9.26	8.91	9.27	8.25	8.21													YGR147C	>0.9999	YIL004C	>0.9999	YPL030W	>0.9999	YPR161C	>0.9999
YEL004W	7.19	7.59	7.1	7.19	7.83	7.83	7.46	7.38	7.97	7.27	7.12	7.13	7.57	7.68	7.52	7.52													YGR001C	>0.9999	YPL101W	>0.9999	YJR010C-A	>0.9999	YPL140C	>0.9999
YEL005C	7.07	6.91	6.79	6.95	7.48	7.24	7.39	7.31	7.36	6.9	6.74	6.72	7.1	7.17	7.4	7.36													YJL003W	>0.9999	YEL075C	>0.9999	YJL153C	>0.9999	YIL109C	>0.9999
YEL006W	8.09	7.9	7.9	7.94	8.14	8.18	8.05	8	8.19	7.85	7.93	8.03	8.04	8.07	8.03	8.05													YBL034C	>0.9999	YNL024C-A	0.9875	YOR303W	>0.9999	YJR073C	>0.9999
YEL007W	9.41	9.31	9.05	9.25	9.88	9.51	9.27	9.23	9.43	9.38	8.88	8.49	9.35	9.45	9.29	9.19													YNR069C	>0.9999	YLR208W	>0.9999	YMR279C	>0.9999	YPR171W	>0.9999
YEL009C	12.39	12.51	12.21	12.27	12.4	12.38	12.35	12.22	12.52	12.43	12.19	12.21	12.54	12.53	12.31	12.26													YIR015W	>0.9999	YEL047C	>0.9999	YDR254W	>0.9999	YJR004C	>0.9999
YEL011W	7.84	9.23	7.21	8.14	9.14	8.89	8.34	8.35	9.64	8.05	7.91	7.73	8.7	9.39	8.53	8.46													YLL009C	>0.9999	YOR224C	>0.9999	YER038C	>0.9999	YDL215C	>0.9999
YEL012W	7.63	8.07	6.98	7.7	8.32	8.01	7.88	7.98	8.23	7.8	8.02	7.86	8.19	8.47	8.15	8.16													YDR375C	>0.9999	YNL139C	0.9378	YDL195W	>0.9999	YDR402C	0.9972
YEL013W	8.5	8.44	8.82	8.93	8.48	8.62	9.03	9	8.5	8.42	8.89	8.7	8.22	8.39	8.85	8.89													YCR045C	>0.9999	YNR036C	0.9989	YKL081W	>0.9999	YPL092W	0.0741
YEL015W	8.56	8.36	8.48	8.44	8.41	8.43	8.42	8.26	8.4	8.32	8.23	8.22	8.27	8.34	8.26	8.22													YOR007C	>0.9999	YDR494W	>0.9999	YFL017C	>0.9999	YDL224C	>0.9999
YEL016C	7.31	7.63	7.34	7.36	7.38	7.32	7.35	7.28	7.53	7.48	7.3	7.44	7.97	7.79	7.36	7.36													YOL086W-A	>0.9999	YOL098C	>0.9999	YMR261C	>0.9999	YDR174W	>0.9999
YEL017C-A	11.93	11.89	11.55	11.77	11.95	11.86	11.66	11.68	11.79	11.85	11.46	11.43	11.88	11.89	11.69	11.56													YJR043C	>0.9999	YJL068C	>0.9999	YOR144C	>0.9999	YLR060W	>0.9999
YEL017W	8.83	8.76	8.84	9.1	9.29	9.09	9.22	9.1	8.69	8.63	8.84	9.01	8.78	8.88	9.26	9.28													YGL103W	>0.9999	YHR186C	>0.9999	YKL106C-A	>0.9999	YJL159W	>0.9999
YEL018W	7.19	7.23	7.16	7.1	7.27	7.03	7.01	7.04	6.97	7.39	7.34	7.52	7.24	7.38	7.14	7.07													YDR038C	>0.9999	YDR270W	0.9378	YGR204W	>0.9999	YPL109C	>0.9999
YEL018W	7.25	7.33	7.24	7.1	7.26	7.13	7.01	7.11	6.91	7.51	7.43	7.43	7.44	7.51	7.06	7.12													YKR004C	>0.9999	YCL037C	0.9526	YJL198W	>0.9999	YGL175C	>0.9999
YEL018W	5.92	5.86	6.06	5.94	5.74	5.86	5.66	5.63	5.56	6.08	6.14	6.43	6.02	5.91	5.69	5.8													YMR278W	>0.9999	YOL021C	>0.9999	YDR033W	>0.9999	YDR472W	>0.9999
YEL018W	7.37	7.42	7.17	7.19	7.53	7.27	7.08	7.13	7.12	7.57	7.32	7.19	7.71	7.59	7.12	7													YDL161W	>0.9999	YPL245W	>0.9999	YPR161C	>0.9999	YMR168C	>0.9999
YEL019C	4.08	3.98	3.87	3.55	4.24	3.88	3.45	3.52	4.13	4.36	4.13	4.28	4.88	5	3.55	3.64													YOR137C	>0.9999	YBL001C	0.9998	YPL140C	0.9444	YDR468C	>0.9999
YEL020C	5.73	6.2	6.08	5.88	6.12	5.97	5.94	6.19	5.53	6.1	5.92	5.86	6.41	6.36	6.4	6.28													YLR207W	>0.9999	YML067C	>0.9999	YIL109C	>0.9999	YGL021W	>0.9999
YEL020W-A	7.55	7.98	7.82	7.96	7.96	8.27	8.26	8.08	7.13	8.08	8.41	8.49	8.15	8.18	7.95	8.12													YJL050W	>0.9999	YBR208C	>0.9999	YJR073C	>0.9999	YJL108C	>0.9999
YEL021W	3.07	0.99	3.25	1.91	3.27	3.84	3.26	1.74	4.51	1.18	2.11	1.66	0.41	1.23	2.45	2.01													YIL021W	>0.9999	YOL089C	>0.9999	YPR171W	>0.9999	YGL077C	>0.9999
YEL021W	1.96	1.33	1.06	0.97	1.72	1.36	2.13	1.89	1.15	1.64	2.45	2.42	1.66	1.67	1.4	0.92													YDR534C	>0.9999	YMR037C	>0.9999	YJR004C	>0.9999	YIL085C	>0.9999
YEL021W	2.23	1.86	2.72	3.09	2.47	3.08	2.35	2.28	3.6	1.35	1.85	2.06	2.31	2.59	2.84	3.03													YJR022W	>0.9999	YDR540C	>0.9999	YDL215C	>0.9999	YDR485C	>0.9999
YEL021W	3.16	2.75	4.03	3.09	3.08	2.98	3.67	3.66	2.73	3.04	3.26	3.51	3.15	3.33	3.76	3.69													YBL079W	>0.9999	YGR109W-A	0.9946	YPL092W	>0.9999	YMR174C	>0.9999
YEL022W	9.01	8.82	8.76	8.67	8.95	8.84	8.58	8.62	8.8	9	8.55	8.43	9.33	9.01	8.53	8.52													YMR112C	>0.9999	YNL118C	>0.9999	YDL224C	>0.9999	YHL039W	>0.9999
YEL023C	6.3	6.73	6.12	6.16	6.72	6.28	6.28	6.24	6.09	6.61	6.18	6.29	6.51	6.55	6.34	6.44													YJL131C	>0.9999	YGL001C	0.9998	YDR174W	>0.9999	YOR163W	>0.9999
YEL024W	8.66	9.14	8.89	9.33	8.71	8.71	9.1	9.12	8.43	9.12	9.54	9.53	8.56	9.14	9.18	9.11													YER028C	>0.9999	YML048W	>0.9999	YLR060W	>0.9999	YGL179C	>0.9999
YEL024W	8.11	8.33	8.55	9.03	8.13	8.28	8.59	8.69	8.06	8.25	9.06	9.04	7.46	7.96	8.71	8.54													YEL043W	>0.9999	YPL030W	0.9526	YJL159W	>0.9999	YIL124W	>0.9999
YEL024W	8.51	8.8	8.92	9.38	8.61	8.68	9.02	9.1	8.56	8.72	9.44	9.47	8.03	8.68	9.15	9.08													YHR166C	0.1611	YJR010C-A	0.9946	YPL109C	>0.9999	YBR021W	>0.9999
YEL024W	8.2	8.58	8.62	9.2	8.28	8.25	8.71	8.78	8.1	8.38	9.24	9.33	7.67	8.35	8.85	8.73													YLR165C	>0.9999	YLR127C	>0.9999	YGL175C	0.5167	YNL294C	>0.9999
YEL025C	6.57	6.98	6.7	6.38	7.64	7.61	7.13	8.23	6.75	6.4	6.13	6.04	6.57	6.53	6.75	7.07													YPR154W	>0.9999	YJL153C	>0.9999	YDR472W	>0.9999	YMR071C	>0.9999
YEL026W	12	12.07	11.9	11.76	11.57	11.74	11.62	11.65	11.58	12.13	11.75	11.8	11.91	11.8	11.58	11.56													YLL054C	>0.9999	YOR303W	0.8218	YMR168C	>0.9999	YOL105C	>0.9999
YEL027W	11.78	12.3	11.71	11.92	11.91	11.91	11.98	11.96	11.77	11.87	12.02	12.01	11.97	12.01	12.07	12.01													YOR017W	>0.9999	YMR279C	>0.9999	YDR468C	>0.9999	YDL125C	>0.9999
YEL029C	6.57	6.99	7.11	7.06	6.39	6.63	7.13	7.16	6.57	6.97	7.63	7.62	7.09	6.95	6.95	7.07													YDR260C	>0.9999	YDR254W	0.9994	YGL021W	>0.9999	YBR039W	>0.9999
YEL030W	4.79	5.03	4.56	4.49	4.76	4.75	4.61	4.71	4.5	4.83	4.62	4.59	5.23	5.29	4.58	4.82													YDR300C	>0.9999	YER038C	>0.9999	YJL108C	>0.9999	YDR272W	>0.9999
YEL031W	10.51	10.86	10.43	10.44	10.46	10.28	10.23	10.26	10.48	10.62	10.13	9.96	10.67	10.33	10.18	10.18													YPL054W	>0.9999	YKL081W	>0.9999	YGL077C	>0.9999	YGL180W	0.9734
YEL032W	8.12	8.18	8.27	8.14	7.99	8.13	8.29	8.17	8.21	8.11	7.83	7.7	7.92	8.02	8.14	7.92													YHR142W	>0.9999	YFL017C	>0.9999	YIL085C	>0.9999	YKR100C	>0.9999
YEL034W	12.5	12.55	12.29	12.33	12.53	12.65	12.29	12.23	12.47	12.46	12.29	12.32	12.41	12.44	12.2	12.18													YGR048W	>0.9999	YMR261C	>0.9999	YDR485C	>0.9999	YDR182W-A	>0.9999
YEL035C	3.91	3.97	3.64	3.29	3.29	3.36	3.64	3.69	1.94	4.11	3.79	3.93	4.56	3.72	2.99	3.08													YLL018C-A	>0.9999	YOR144C	>0.9999	YMR174C	>0.9999	YBR085C-A	>0.9999
YEL036C	8.91	9.05	9.04	8.83	8.78	8.78	8.85	8.77	8.91	8.92	8.64	8.79	8.98	8.79	8.73	8.69													YNR032C-A	>0.9999	YKL106C-A	>0.9999	YHL039W	>0.9999	YBR096W	>0.9999
YEL037C	9.62	9.92	9.1	9.49	9.53	9.59	9.21	9.15	9.62	9.86	9.68	9.61	9.08	9.72	9.37	9.02													YLR315W	>0.9999	YGR204W	>0.9999	YOR163W	>0.9999	YEL007W	>0.9999
YEL038W	7.77	8.2	8.07	8.03	7.74	7.98	7.94	7.91	8.6	8.02	8.11	8.14	7.6	7.84	7.88	7.84													YOL100W	>0.9999	YDR033W	>0.9999	YGL179C	>0.9999	YER093C-A	0.9998
YEL039C	5.34	6.17	4.57	5.18	6.75	6.57	5.32	5.35	6	6	4.67	4.68	5.91	6.77	4.9	4.7													YGL083W	>0.9999	YPR161C	0.9203	YIL124W	>0.9999	YGL011C	>0.9999
YEL040W	10.94	10.68	10.67	10.5	10.85	10.59	10.14	10.15	10.62	10.88	10.19	10.11	10.92	10.82	9.98	9.88													YPR055W	>0.9999	YPL140C	0.9203	YBR021W	>0.9999	YNL006W	>0.9999
YEL041W	5.28	5.7	5.18	5.78	5.81	5.6	5.95	5.85	6.2	5	5.47	5.61	5.41	5.75	6.13	6.09													YNL169C	>0.9999	YIL109C	>0.9999	YNL294C	>0.9999	YGR255C	>0.9999
YEL042W	10.55	10.92	10.55	10.44	10.11	10.11	10.11	10.2	10.07	10.5	10.36	10.34	10.61	10.52	10.04	10.15													YEL036C	>0.9999	YJR073C	>0.9999	YMR071C	>0.9999	YBR139W	>0.9999
YEL043W	8.68	8.99	8.46	8.42	8.74	8.53	8.37	8.43	8.34	8.73	8.08	8.01	8.88	8.6	8.43	8.29													YOR308C	>0.9999	YPR171W	>0.9999	YOL105C	>0.9999	YGR187C	>0.9999
YEL044W	7.77	7.83	7.9	7.68	8.11	7.93	8.04	7.92	8.58	7.71	7.99	8.01	8.17	8.15	8.12	8.09													YLR067C	>0.9999	YJR004C	>0.9999	YDL125C	>0.9999	YMR217W	>0.9999
YEL046C	9.77	9.31	10.13	9.85	9.09	9.38	9.75	9.38	9	9.41	9.35	9.18	8.84	8.79	9.22	8.99													YNL258C	>0.9999	YDL215C	>0.9999	YBR039W	>0.9999	YBR095C	>0.9999
YEL047C	8.59	9.15	8.72	8.59	8.97	9.01	9.04	9.1	9.36	8.82	8.74	8.64	9.12	9.33	9.25	9.22													YOR251C	>0.9999	YDR402C	0.1361	YDR272W	>0.9999	YLR456W	>0.9999
YEL048C	5.88	6.04	6.51	6.07	5.56	6	5.78	5.79	5.66	5.73	6.45	6.56	5.73	5.71	5.58	5.77													YPL170W	>0.9999	YDL224C	0.4642	YGL180W	>0.9999	YGL262W	>0.9999
YEL049W	4.92	5.03	5.07	5.14	5.37	5.21	5.41	5.43	6.39	5.05	4.7	4.77	4.93	4.69	5.69	5.31													YJR130C	>0.9999	YDR174W	>0.9999	YKR100C	>0.9999	YHR010W	>0.9999
YEL050C	7.53	7.9	8	8	7.82	8.08	8.12	8.14	7.64	7.91	8.35	8.44	8.02	8.42	8.14	8.04													YCL028W	>0.9999	YLR060W	>0.9999	YDR182W-A	0.146	YDL098C	>0.9999
YEL051W	9.89	9.96	9.94	10.1	10.16	10.22	10.17	10.34	9.91	10.01	10.55	9.98	10.27	10.28	10.19	10.14													YGR085C	>0.9999	YJL159W	>0.9999	YBR085C-A	>0.9999	YNL293W	>0.9999
YEL052W	7.98	8.21	8.62	8.55	8.49	8.44	8.87	8.78	8.37	8	8.38	8.25	8.5	8.51	8.76	8.66													YIL051C	>0.9999	YPL109C	>0.9999	YBR096W	>0.9999	YLR306W	>0.9999
YEL053C	7.61	7.37	7.89	7.46	8.05	7.87	7.92	7.95	7.69	7.64	7.21	7.17	7.88	7.64	7.92	7.93													YDR248C	>0.9999	YGL175C	>0.9999	YEL007W	>0.9999	YOL061W	>0.9999
YEL054C	11.36	11.22	11.66	11.56	11.26	11.34	11.56	11.59	11.1	11.39	11.71	11.65	11.37	11.34	11.57	11.51													YPR010C	>0.9999	YDR472W	>0.9999	YGL011C	>0.9999	YLR055C	>0.9999
YEL055C	9.09	8.81	8.95	8.59	8.25	8.44	8.24	8.36	8.22	8.99	8.46	8.42	8.91	8.57	8.18	8.29													YOR195W	>0.9999	YMR168C	>0.9999	YNL006W	>0.9999	YPL021W	>0.9999
YEL056W	8.09	8.1	8.09	8.14	7.8	8.04	8.12	8.09	8.03	7.83	8.11	8.22	7.95	7.93	8.11	8.11													YBR231C	>0.9999	YDR468C	>0.9999	YGR255C	>0.9999	YKL152C	>0.9999
YEL057C	3.9	4.6	3.57	3.94	3.97	3.36	3.75	3.63	4.21	4.3	4.05	4.02	3.59	3.6	3.9	3.72													YEL058W	>0.9999	YGL021W	0.6496	YBR139W	>0.9999	YBR252W	>0.9999
YEL058W	8.97	9.27	9.61	9.48	9.22	9.36	9.89	9.77	10.37	9.16	9.54	9.27	9.44	9.58	9.93	9.98													YJR110W	>0.9999	YGL077C	>0.9999	YGR187C	>0.9999	YGL073W	>0.9999
YEL059C-A	6.57	6.99	6.74	6.85	6.72	6.89	7.44	7.35	8.31	7.28	7.43	7.36	6.81	7.17	7.91	6.73													YNL042W	>0.9999	YIL085C	>0.9999	YMR217W	>0.9999	YJL072C	>0.9999
YEL060C	9.34	9.41	9.39	9.7	9.72	9.54	10.05	10.16	10.57	9.23	9.68	9.45	8.95	9.3	10.5	10.52													YDR090C	>0.9999	YDR485C	>0.9999	YBR095C	>0.9999	YDL045C	>0.9999
YEL061C	8.22	7.21	7.68	7.94	7.88	7.69	7.52	7.6	7.2	7.9	7.85	7.89	8.29	7.79	7.46	7.59													YCL035C	>0.9999	YMR174C	0.9994	YLR456W	>0.9999	YKL124W	>0.9999
YEL062W	6.94	6.85	6.85	7.01	6.9	6.82	7.12	7.05	6.84	6.96	6.96	6.84	7	7.09	7.16	7.17													YOR009W	>0.9999	YHL039W	>0.9999	YHR010W	>0.9999	YML104C	>0.9999
YEL063C	9.22	9.01	9.89	9.91	9.51	9.28	10.28	10.06	9.64	9.04	9.49	9.39	9.25	9.44	10.27	10.25													YOR265W	>0.9999	YOR163W	>0.9999	YDL098C	>0.9999	YBL007C	>0.9999
YEL064C	5.33	5.57	5.48	5.85	5.43	5.46	6.12	6.2	5.52	5.41	5.91	5.83	5.9	5.88	6.15	6.26													YHR138C	>0.9999	YGL179C	>0.9999	YNL293W	>0.9999	YMR225C	>0.9999
YEL065W	7.97	8.39	7.63	6.51	8.19	7.65	7.46	8.23	9.28	7.54	8.16	7.88	8.31	8.28	8.5	8.4													YHR023W	>0.9999	YIL124W	0.7576	YLR306W	>0.9999	YDR307W	>0.9999
YEL066W	7.8	8.3	7.9	8.01	8.12	8.26	8.41	8.33	9.43	7.8	8.29	8.28	7.95	8.24	8.72	8.54													YER149C	>0.9999	YBR021W	0.2777	YOL061W	>0.9999	YOL115W	>0.9999
YEL069C	2.29	2.08	2.27	2.07	3.14	2.45	2.04	2.17	1.83	2.72	1.32	2.03	2.72	2.22	2.2	2.06													YLR179C	>0.9999	YNL294C	>0.9999	YLR055C	>0.9999	YGR109W-B	>0.9999
YEL069C	2.59	2.29	2.53	2.51	2.92	1.9	1.52	2.55	3.14	2.38	1.88	1.86	2.24	2.03	1.64	2.31													YGL220W	>0.9999	YMR071C	0.6866	YKL152C	>0.9999	YLR152C	0.6747
YEL070W	4.41	4.98	4.67	4.05	5.59	4.73	4.18	4.3	5.09	4.63	4.02	4.35	4.57	4.85	4.2	4.17													YCR004C	>0.9999	YOL105C	>0.9999	YBR252W	>0.9999	YGR147C	>0.9999
YEL071W	11.75	11.97	10.96	11.49	11.42	11.48	11.22	11.28	12.02	11.76	11.44	11.53	11.55	11.55	11.35	11.33													YOR156C	>0.9999	YDL125C	>0.9999	YGL073W	>0.9999	YGR001C	>0.9999
YEL072W	8.12	7.98	7	8.05	8.21	8.29	8.01	8.24	8	7.81	8.12	8.38	8.72	8.53	8.28	8.18													YGL227W	>0.9999	YBR039W	>0.9999	YJL072C	>0.9999	YJL003W	>0.9999
YEL073C	7.67	7.61	6.81	7.69	7.44	7.28	7.19	7.65	7.9	7.11	7.9	7.83	7.79	7.68	7.78	7.86													YJR098C	>0.9999	YDR272W	0.9989	YDL045C	>0.9999	YBL034C	>0.9999
YEL075C	2.32	2.56	0.9	1.67	2.6	2.01	1.9	1.97	1.47	1.93	1.74	0.97	1.69	2.31	1.78	1.63													YNL022C	>0.9999	YGL180W	0.2524	YKL124W	>0.9999	YNR069C	0.9987
YEL076C	5.56	4.79	5.19	5.55	6.75	6.04	5.55	5.44	5.73	3.94	3.97	3.49	4.2	4.38	5.61	5.49													YDR034C	>0.9999	YKR100C	>0.9999	YML104C	>0.9999	YIR015W	>0.9999
YEL076C-A	6.92	6.57	6.55	6.93	7.93	7.36	6.91	6.88	6.91	5.45	5.66	5.11	5.91	6.09	7.11	6.91													YDR041W	>0.9999	YDR182W-A	>0.9999	YBL007C	>0.9999	YLL009C	>0.9999
YER001W	9.69	9.12	9.47	9.51	9.24	9.21	9.38	9.59	8.62	9.71	9.22	9.08	9.57	9.34	9.47	9.58													YDR292C	>0.9999	YBR096W	>0.9999	YMR225C	>0.9999	YDR375C	>0.9999
YER002W	9.33	9.06	8.95	8.67	8.44	8.83	7.97	7.98	8.61	9.39	8.84	9.03	8.68	8.53	7.66	7.71													YMR205C	>0.9999	YEL007W	0.7907	YDR307W	>0.9999	YCR045C	0.8137
YER003C	10.31	10.39	10.67	10.68	10.24	10.37	10.65	10.74	10.26	10.24	10.59	10.45	9.8	9.84	10.83	10.79													YKL048C	>0.9999	YGL011C	>0.9999	YOL115W	>0.9999	YOR007C	>0.9999
YER004W	8.8	9	9.02	8.94	8.79	8.96	8.92	8.99	9.47	8.86	9.14	9.19	8.86	8.99	9.09	9.01													YLR172C	>0.9999	YNL006W	0.9998	YGR109W-B	>0.9999	YOL086W-A	>0.9999
YER005W	7.44	7.86	7.62	7.51	7.4	7.46	7.57	7.54	7.49	7.48	7.48	7.37	7.74	7.61	7.5	7.6													YJR122W	>0.9999	YGR255C	>0.9999	YLR152C	>0.9999	YJR043C	>0.9999
YER006W	10.33	9.97	10.21	9.81	9.22	9.69	9.3	9.14	9.71	10.23	9.56	9.66	9.54	9.45	9.06	9													YLR382C	>0.9999	YBR139W	>0.9999	YGR147C	>0.9999	YGL103W	>0.9999
YER007C-A	9.89	9.89	10.03	9.91	9.79	9.89	9.82	9.9	9.63	10	10.25	10.15	9.91	10.02	9.8	9.82													YKR010C	>0.9999	YGR187C	>0.9999	YGR001C	0.9138	YDR038C	>0.9999
YER007W	5.78	5.9	6.02	5.66	5.55	5.28	5.62	5.63	5.44	5.7	5.96	5.97	5.66	5.54	5.55	5.49													YBR069C	>0.9999	YMR217W	>0.9999	YJL003W	>0.9999	YKR004C	>0.9999
YER008C	8.81	8.89	8.54	8.63	8.76	8.58	8.37	8.34	8.61	8.54	8.35	8.25	8.42	8.21	8.29	8.18													YIL026C	>0.9999	YBR095C	>0.9999	YBL034C	>0.9999	YMR278W	>0.9999
YER009W	11.26	11.16	11.18	11.27	11.18	11.39	11.27	11.3	11.46	11.16	11.26	11.18	11.07	11.1	11.32	11.31													YPR067W	>0.9999	YLR456W	0.612	YNR069C	>0.9999	YDL161W	>0.9999
YER010C	7.62	7.63	7.63	7.76	7.95	7.98	8.19	8.24	8.07	7.68	8.05	7.99	7.67	7.94	8.4	8.36													YJL062W-A	>0.9999	YHR010W	>0.9999	YIR015W	0.9815	YOR137C	>0.9999
YER011W	6.02	6.59	5.64	5.77	5.7	6.11	5.76	5.89	7.87	6.32	5.43	5.63	6	6.11	6.02	5.64													YKR026C	>0.9999	YDL098C	0.9917	YLL009C	>0.9999	YLR207W	>0.9999
YER012W	10.22	10.78	9.84	10.05	9.99	9.97	9.91	9.94	10	10.36	10.44	10.3	10.08	10.13	9.97	9.96													YDR282C	>0.9999	YNL293W	>0.9999	YDR375C	>0.9999	YJL050W	>0.9999
YER013W	7.71	7.72	7.56	7.51	7.55	7.31	7.49	7.39	7.61	7.83	7.44	7.46	7.81	7.59	7.38	7.26													YPR022C	>0.9999	YLR306W	>0.9999	YOR007C	>0.9999	YIL021W	>0.9999
YER014C-A	3.26	3.05	3.47	2.74	3.41	2.92	3	3.1	3.05	3	2.95	3	3.23	3.18	3.11	3.03													YNL302C	>0.9999	YOL061W	>0.9999	YOL086W-A	>0.9999	YDR534C	>0.9999
YER014W	7.34	7.42	6.77	7.06	7.47	7.23	7.2	7.21	7.74	7.39	6.91	6.91	7.66	7.69	7.48	7.42													YCR046C	>0.9999	YLR055C	>0.9999	YJR043C	>0.9999	YJR022W	>0.9999
YER015W	5.19	5.88	5.59	5.5	5.58	5.37	6.14	5.58	6.03	5.7	5.36	5.2	5.71	5.87	5.81	6.05													YOR275C	>0.9999	YPL021W	>0.9999	YGL103W	>0.9999	YBL079W	>0.9999
YER016W	7.32	6.99	6.94	7.09	7.33	7.43	6.96	7.1	7.02	7.36	7.32	7.32	7.3	7.33	7.1	7.11													YLL048C	>0.9999	YKL152C	>0.9999	YDR038C	>0.9999	YMR112C	>0.9999
YER017C	8.64	8.82	8.45	8.63	8.84	8.82	8.49	8.44	8.8	8.61	8.26	8.3	8.73	8.7	8.48	8.45													YMR077C	>0.9999	YBR252W	0.9967	YKR004C	>0.9999	YJL131C	>0.9999
YER018C	6.57	6.98	6.95	7.08	6.84	6.84	7.35	7.28	6.93	6.86	7.35	7.24	7.08	7.28	7.65	7.56													YDL188C	>0.9999	YJL072C	>0.9999	YMR278W	>0.9999	YER028C	>0.9999
YER019C-A	10.35	10.54	10.37	10.47	10.73	10.69	10.7	10.59	10.9	10.43	10.39	10.5	10.45	10.46	10.68	10.67													YBR049C	>0.9999	YDL045C	>0.9999	YDL161W	>0.9999	YEL043W	>0.9999
YER019W	7.22	7.36	7.41	7.55	7.52	7.39	7.73	7.7	7.8	7.29	7.39	7.27	7.56	7.5	7.72	7.67													YPL263C	>0.9999	YKL124W	>0.9999	YOR137C	>0.9999	YHR166C	>0.9999
YER020W	8.95	9.2	8.76	8.95	9.83	9.69	9.26	9.23	9.85	8.88	8.9	8.86	9.62	9.96	9.34	9.32													YLR228C	>0.9999	YML104C	>0.9999	YLR207W	>0.9999	YLR165C	>0.9999
YER021W	9.53	9.58	9.43	9.47	9.5	9.47	9.44	9.42	9.64	9.45	9.48	9.53	9.56	9.41	9.34	9.46													YOR099W	>0.9999	YBL007C	>0.9999	YJL050W	>0.9999	YPR154W	>0.9999
YER022W	8.56	8.15	8.46	8.37	8.63	8.41	8.41	8.48	8.36	8.45	8.25	8.27	8.54	8.46	8.39	8.45													YHR178W	>0.9999	YMR225C	>0.9999	YIL021W	>0.9999	YLL054C	>0.9999
YER022W	4.83	3.92	4.63	4.85	4.72	4.53	4.59	4.69	3.93	4.17	5.13	4.9	4.3	4.65	4.39	4.45													YER049W	>0.9999	YDR307W	0.2524	YDR534C	>0.9999	YOR017W	>0.9999
YER022W	6.69	6.03	6.56	6.67	6.65	6.33	6.53	6.63	5.63	6.18	7.25	6.98	6.36	6.52	6.43	6.49													YML105C	>0.9999	YOL115W	>0.9999	YJR022W	>0.9999	YDR260C	>0.9999
YER023W	11.47	11.83	11.21	11.32	11.41	11.33	11.21	11.38	11.5	11.59	11.49	11.51	11.62	11.63	11.48	11.5													YHR149C	>0.9999	YGR109W-B	0.9203	YBL079W	>0.9999	YDR300C	>0.9999
YER024W	7.85	8.2	7.55	8.15	7.41	7.48	8.06	7.31	8.95	7.75	6.87	7.16	7.35	7.43	7.42	7.02													YOR284W	>0.9999	YLR152C	0.9967	YMR112C	>0.9999	YHR142W	>0.9999
YER025W	10.79	10.99	11.08	10.95	10.46	10.63	10.72	10.79	10.47	10.76	10.81	10.83	10.46	10.48	10.69	10.73													YDR438W	>0.9999	YGR147C	>0.9999	YJL131C	>0.9999	YGR048W	>0.9999
YER026C	10.29	10.83	10.23	10.7	10.19	10.27	10.18	10.36	10.73	9.98	10.87	10.85	10.12	10.2	10.41	10.34													YJL130C	>0.9999	YGR001C	>0.9999	YER028C	>0.9999	YLL018C-A	>0.9999
YER027C	8.4	8.41	8.55	8.56	8.67	8.57	8.48	8.75	8.12	8.52	8.74	8.68	8.74	8.84	8.66	8.52													YHR014W	>0.9999	YJL003W	0.3958	YEL043W	>0.9999	YNR032C-A	>0.9999
YER028C	7.38	7.33	7.77	7.41	6.25	6.75	7.47	7.23	7.04	6.88	7.27	7.37	6.25	6.17	7.12	7.23													YER188C-A	>0.9999	YBL034C	0.8218	YHR166C	>0.9999	YLR315W	>0.9999
YER029C	8.05	8.27	7.69	7.85	8.08	8.09	7.58	7.5	7.94	8.32	7.89	8.05	8.11	8.21	7.64	7.68													YKR037C	>0.9999	YNR069C	>0.9999	YLR165C	>0.9999	YOL100W	>0.9999
YER030W	8.58	8.35	8.62	8.66	8.46	8.51	8.55	8.63	8.8	8.52	8.99	8.95	8.89	8.68	8.56	8.55													YAR014C	>0.9999	YIR015W	>0.9999	YPR154W	>0.9999	YGL083W	>0.9999
YER031C	9.31	9.47	9.52	9.52	9.24	9.37	9.48	9.63	9.2	9.24	9.84	9.85	9.33	9.44	9.63	9.7													YNR075W	>0.9999	YLL009C	0.9378	YLL054C	>0.9999	YPR055W	>0.9999
YER032W	9.01	8.76	8.58	8.73	9	8.86	8.38	8.47	8.83	8.85	8.31	8.32	9.15	8.9	8.59	8.55													YOR245C	>0.9999	YDR375C	>0.9999	YOR017W	>0.9999	YNL169C	>0.9999
YER033C	6.51	6.92	6.24	6.73	7.56	7.04	7	6.99	7.12	6.72	6.49	6.25	6.92	7.07	7.2	6.99													YFR051C	>0.9999	YOR007C	>0.9999	YDR260C	>0.9999	YEL036C	>0.9999
YER034W	7.5	7.32	7.24	7.15	7.41	7.48	6.91	6.91	8.12	7.6	7.06	7.18	7.41	7.45	7.16	7.02													YOR008C-A	>0.9999	YOL086W-A	>0.9999	YDR300C	>0.9999	YOR308C	>0.9999
YER035W	8.33	8.98	8.41	8.72	9.4	9.2	9.28	9.04	10.05	8.45	8.75	8.76	8.57	9.11	9.41	9.32													YPL149W	>0.9999	YJR043C	>0.9999	YPL054W	>0.9999	YLR067C	>0.9999
YER036C	10.94	10.78	10.91	10.81	10.47	10.74	10.44	10.38	10.59	10.83	10.39	10.45	10.55	10.53	10.25	10.25													YBR262C	>0.9999	YGL103W	>0.9999	YHR142W	>0.9999	YNL258C	>0.9999
YER037W	5.81	6.14	5.77	6.54	5.33	5.67	5.92	6.24	6.96	5.81	7.05	7.08	5.21	5.62	6.36	6.36													YPL223C	>0.9999	YDR038C	>0.9999	YGR048W	>0.9999	YOR251C	>0.9999
YER038C	4.77	4.8	4.73	4.99	4.21	4.53	4.82	4.71	4.75	4.52	4.78	4.78	4.02	4.26	4.66	4.51													YGR215W	>0.9999	YKR004C	>0.9999	YLL018C-A	>0.9999	YPL170W	>0.9999
YER039C	5.1	5.49	5.4	5.43	5.88	5.6	5.86	5.74	5.62	5.23	5.15	5.2	5.75	5.73	5.88	5.76													YDL107W	>0.9999	YMR278W	>0.9999	YNR032C-A	>0.9999	YCL028W	>0.9999
YER039C-A	4.23	4.27	4.06	4.65	4.58	4.06	5.01	4.8	4.11	3.91	4.55	4.77	4.64	4.77	4.97	4.76													YBR089C-A	>0.9999	YDL161W	>0.9999	YLR315W	>0.9999	YGR085C	>0.9999
YER040W	7.1	7.06	7.26	7.23	7.11	6.9	7.29	7.09	6.62	6.97	6.85	6.61	7.16	6.92	7.04	6.94													YPR121W	>0.9999	YOR137C	>0.9999	YOL100W	>0.9999	YIL051C	>0.9999
YER041W	6.68	6.89	6.54	6.6	6.75	6.62	6.56	6.63	6.96	6.67	6.35	6.4	6.64	6.66	6.73	6.67													YDR255C	>0.9999	YLR207W	0.5001	YGL083W	>0.9999	YDR248C	>0.9999
YER042W	8.98	8.83	9.09	9.28	8.38	8.78	9	9.04	9.74	8.63	9.4	9.52	8.36	8.54	8.98	8.85													YCR088W	>0.9999	YIL021W	>0.9999	YPR055W	0.8952	YPR010C	>0.9999
YER043C	12.65	12.83	12.23	12.49	12.54	12.55	12.29	12.3	12.64	12.72	12.5	12.55	12.41	12.6	12.4	12.32													YNL086W	>0.9999	YDR534C	>0.9999	YNL169C	>0.9999	YOR195W	>0.9999
YER044C	9.37	10.49	8.68	9.01	10.25	10.2	9.37	9.26	9.95	9.92	9.46	8.98	10.5	10.59	9.67	9.68													YDR381C-A	>0.9999	YJR022W	>0.9999	YEL036C	>0.9999	YBR231C	>0.9999
YER044C-A	3.11	3.25	2.89	2.99	3.34	2.4	2.75	2.88	2.85	3.24	3.25	2.82	3.26	3.3	2.6	2.79													YPL128C	>0.9999	YBL079W	0.8505	YOR308C	>0.9999	YEL058W	>0.9999
YER045C	7.38	7.31	7.39	7.1	7.91	7.58	7.34	7.19	8.73	7.32	6.67	6.56	7.23	7.29	7.58	7.64													YIL144W	>0.9999	YMR112C	>0.9999	YLR067C	0.0821	YJR110W	>0.9999
YER046W	5.94	6.34	5.87	6.26	6.58	6.27	6.35	6.33	6.61	6.12	6.53	6.38	6.34	6.61	6.46	6.53													YDR067C	>0.9999	YJL131C	0.4293	YNL258C	>0.9999	YNL042W	>0.9999
YER047C	7.4	7.55	7.29	7.12	7.38	7.17	7.1	7.07	7.47	7.33	6.93	6.9	7.39	7.29	7.21	7.12													YJL136C	>0.9999	YER028C	>0.9999	YOR251C	>0.9999	YDR090C	>0.9999
YER048C	9.94	9.66	9.27	9.74	10	9.96	9.77	9.44	9.77	9.85	9.9	9.86	9.8	10.02	9.57	9.62													YDR135C	>0.9999	YEL043W	0.9967	YPL170W	>0.9999	YCL035C	>0.9999
YER048W-A	7.29	7.31	7.35	7.6	7.56	7.66	7.77	7.7	7.41	7.47	8.16	8.15	7.77	7.78	7.68	7.8													YDR518W	>0.9999	YHR166C	>0.9999	YJR130C	>0.9999	YOR009W	>0.9999
YER049W	9.16	9.38	9.3	9	8.75	8.98	8.67	8.69	8.61	9.13	9.04	9.02	8.95	8.8	8.57	8.66													YLR344W	>0.9999	YLR165C	>0.9999	YCL028W	>0.9999	YOR265W	>0.9999
YER050C	8.89	8.85	8.77	8.94	9.02	9.01	8.98	8.97	8.64	8.97	9.11	9.04	9.04	9.1	8.94	8.98													YML110C	>0.9999	YPR154W	>0.9999	YGR085C	>0.9999	YHR138C	>0.9999
YER051W	6.43	6.89	6	6.47	6.57	6.3	6.28	6.29	6.32	6.63	6.53	6.5	6.41	6.55	6.47	6.36													YGL230C	>0.9999	YLL054C	>0.9999	YIL051C	>0.9999	YHR023W	>0.9999
YER052C	10.77	11.04	10.85	11.11	10.67	10.77	11.02	10.66	10.43	10.82	10.51	10.61	10.76	10.58	10.44	10.13													YGR184C	>0.9999	YOR017W	0.8505	YDR248C	>0.9999	YER149C	>0.9999
YER053C	7.16	7.97	7.27	7.98	9.05	8.44	8.81	8.75	8.02	7.04	7.62	7.57	7.96	8.64	8.83	8.68													YLR368W	>0.9999	YDR260C	>0.9999	YPR010C	>0.9999	YLR179C	>0.9999
YER053C-A	4.02	4.81	5.11	5.99	7.31	6.34	8.05	7.53	4.34	4.22	6.11	6.04	6.22	7.16	7.64	7.34													YER184C	0.5983	YDR300C	>0.9999	YOR195W	>0.9999	YGL220W	>0.9999
YER054C	3.45	4.57	3.13	3.49	4.88	4.13	3.9	3.7	4.11	3.91	3.69	3.7	4.46	4.67	3.73	3.97													YJL080C	>0.9999	YPL054W	>0.9999	YBR231C	>0.9999	YCR004C	>0.9999
YER055C	10.89	11.27	11.41	11.36	11.06	11.15	11.39	11.21	11.12	11	11.36	11.35	11.37	11.33	11.06	10.89													YGR174W-A	>0.9999	YHR142W	>0.9999	YEL058W	>0.9999	YOR156C	>0.9999
YER056C	11.1	11.13	11.48	11.16	10.54	10.9	10.89	10.73	11.17	11.03	10.97	11.02	10.51	10.33	10.71	10.64													YOL086C	>0.9999	YGR048W	>0.9999	YJR110W	>0.9999	YGL227W	>0.9999
YER056C-A	11.62	11.34	11.69	11.67	11.55	11.52	11.62	11.7	11.4	11.64	11.77	11.74	11.66	11.64	11.64	11.55													YNL106C	>0.9999	YLL018C-A	>0.9999	YNL042W	>0.9999	YJR098C	>0.9999
YER057C	10.29	10.49	10.37	10.52	10.59	10.8	10.71	10.75	11.17	10.47	10.69	10.62	10.59	10.7	10.96	10.87													YMR004W	>0.9999	YNR032C-A	0.9994	YDR090C	>0.9999	YNL022C	>0.9999
YER058W	6.52	6.92	6.19	6.63	7.28	7.11	6.94	6.79	6.96	6.93	6.77	6.67	7.21	7.4	6.82	6.65													YAR002W	>0.9999	YLR315W	>0.9999	YCL035C	>0.9999	YDR034C	>0.9999
YER059W	7.73	7.63	7.51	7.7	8	7.77	7.83	7.84	7.91	7.69	7.69	7.64	7.9	7.91	7.89	7.84													YNR018W	>0.9999	YOL100W	0.0542	YOR009W	>0.9999	YDR041W	>0.9999
YER060W	4.22	4.54	3.69	3.79	3.66	3.51	3.46	3.68	3.13	4.36	3.95	3.81	3.66	3.58	3.63	3.64													YEL064C	>0.9999	YGL083W	0.998	YOR265W	>0.9999	YDR292C	>0.9999
YER060W-A	4.61	4.03	5.12	4.93	4.84	4.82	4.92	4.91	5.06	4.09	3.84	3.9	3.89	3.53	5.16	4.93													YOR315W	>0.9999	YPR055W	>0.9999	YHR138C	>0.9999	YMR205C	>0.9999
YER061C	6.83	7.29	7.11	7.18	6.71	7.03	7.25	7.08	7.39	6.9	7.12	7.22	7.22	7.18	7.37	7.32													YLR090W	>0.9999	YNL169C	>0.9999	YHR023W	0.4244	YKL048C	>0.9999
YER062C	10.25	10.36	10.43	10.5	9.64	10.07	10.15	10.33	10.04	10.03	10.53	10.48	9.15	9.17	10.13	10.06													YLR319C	>0.9999	YEL036C	>0.9999	YER149C	>0.9999	YLR172C	>0.9999
YER063W	9.44	9.47	9.21	9.37	9.54	9.69	9.44	9.45	9.73	9.41	9.57	9.54	9.47	9.48	9.39	9.36													YOL032W	>0.9999	YOR308C	>0.9999	YLR179C	>0.9999	YJR122W	>0.9999
YER064C	7.76	7.32	8.75	7.77	5.73	6.55	7.17	7.24	7.2	7.53	7.08	7.16	6.19	6.11	6.86	6.87													YDR246W	>0.9999	YLR067C	>0.9999	YGL220W	>0.9999	YLR382C	>0.9999
YER065C	5.37	5.87	5.4	5.59	5.51	5.18	5.64	5.6	5.3	5.58	5.58	5.6	5.75	5.79	5.66	5.68													YER115C	>0.9999	YNL258C	>0.9999	YCR004C	>0.9999	YKR010C	>0.9999
YER066W	5.5	6.04	5.48	5.72	6.11	5.78	6.15	5.99	6.2	5.62	5.64	5.82	6.18	6.39	6.15	6.23													YBR043C	>0.9999	YOR251C	>0.9999	YOR156C	>0.9999	YIL026C	>0.9999
YER067W	5.65	6.91	6.3	6.57	7.84	6.77	7.66	7.32	7.85	5.86	6.17	6.33	7.57	8.16	7.5	7.71													YNL270C	>0.9999	YPL170W	>0.9999	YGL227W	>0.9999	YPR067W	>0.9999
YER068W	8.82	8.7	8.69	8.66	8.67	8.47	8.51	8.65	8.44	8.74	8.4	8.33	8.53	8.56	8.64	8.71													YGL126W	>0.9999	YJR130C	0.2777	YJR098C	>0.9999	YJL062W-A	>0.9999
YER069W	10.93	11.34	11.1	11.29	11.77	11.68	11.66	11.08	10.34	11.07	9.98	10.02	11.83	11.72	10.77	10.21													YJR094W-A	>0.9999	YCL028W	0.9875	YNL022C	>0.9999	YKR026C	>0.9999
YER070W	10.68	10.24	10.35	10.47	10.52	10.51	10.49	10.5	10	10.49	10.08	9.81	10.01	10.08	10.52	10.39													YGL251C	>0.9999	YGR085C	>0.9999	YDR034C	>0.9999	YFR055W	>0.9999
YER071C	6.41	6.44	6.49	6.51	6.91	7.07	6.97	6.85	7.32	6.5	6.77	6.67	6.72	6.65	7	6.86													YDR409W	>0.9999	YIL051C	>0.9999	YDR041W	>0.9999	YDR282C	>0.9999
YER072W	11.73	11.87	11.8	11.61	11.17	11.61	10.98	11.79	11.49	11.81	11.77	11.57	11.67	11.56	11.68	11.78													YJL055W	>0.9999	YDR248C	>0.9999	YDR292C	>0.9999	YPR022C	>0.9999
YER073W	9.86	9.55	10.66	10.3	9.48	9.86	10.33	9.85	9.31	9.53	9.71	9.84	9.95	9.8	9.42	9.26													YER064C	>0.9999	YPR010C	0.4293	YMR205C	>0.9999	YNL302C	>0.9999
YER074W	12.31	12.14	12.38	12.26	12.39	12.37	12.31	12.3	12.29	12.38	12.37	12.41	12.37	12.42	12.34	12.33													YDL135C	>0.9999	YOR195W	>0.9999	YKL048C	>0.9999	YCR046C	>0.9999
YER074W	12.35	12.21	12.33	12.35	12.38	12.41	12.33	12.35	12.29	12.41	12.42	12.39	12.35	12.42	12.34	12.23													YGR104C	>0.9999	YBR231C	0.9875	YLR172C	>0.9999	YOR275C	>0.9999
YER074W-A	9.07	9.13	8.81	8.99	9.38	9.49	9.09	8.96	9.36	9.36	9.29	9.14	9.69	9.58	9.09	9.08													YOR386W	>0.9999	YEL058W	>0.9999	YJR122W	>0.9999	YLL048C	>0.9999
YER075C	7.47	7.19	7.68	7.33	6.9	6.71	7.23	7.18	7.56	7.13	7.42	7.44	7.32	6.83	7.07	7.06													YKL139W	>0.9999	YJR110W	>0.9999	YLR382C	>0.9999	YMR077C	>0.9999
YER076C	6.4	6.5	6.23	6.24	6.27	6.35	6.33	6.53	6.21	6.29	6.36	6.45	6.29	6.34	6.44	6.41													YDR138W	>0.9999	YNL042W	>0.9999	YKR010C	>0.9999	YDL188C	>0.9999
YER077C	6.78	6.92	6.55	6.57	6.88	6.61	6.4	6.33	7.44	6.96	6.52	6.52	7.02	6.95	6.41	6.44													YDL042C	>0.9999	YDR090C	>0.9999	YBR069C	0.9972	YBR049C	>0.9999
YER078C	6.71	6.96	6.89	7.08	6.73	6.93	7.14	7.1	6.44	6.81	7.22	7.17	6.87	6.85	7.13	6.99													YBL085W	>0.9999	YCL035C	>0.9999	YIL026C	>0.9999	YPL263C	>0.9999
YER078W-A	4.23	4.12	4.07	4.12	4.73	4.22	3.9	4.14	4.75	3.96	3.54	3.92	3.71	3.81	4.01	3.97													YGR155W	>0.9999	YOR265W	>0.9999	YPR067W	>0.9999	YLR228C	>0.9999
YER079W	8.61	8.6	7.87	8.39	9.31	9.22	8.66	8.68	9.65	8.41	7.97	7.81	8.7	8.98	8.85	8.66													YNL275W	>0.9999	YHR138C	>0.9999	YJL062W-A	>0.9999	YOR099W	>0.9999
YER080W	8.88	9.15	8.86	8.85	8.93	8.84	8.96	9	9.09	8.82	8.79	8.65	8.9	8.93	9.02	9.11													YNL096C	>0.9999	YHR023W	>0.9999	YKR026C	>0.9999	YHR178W	>0.9999
YER081W	8.41	7.67	9.93	9.1	10.18	10.13	10.1	10.41	11.07	8.89	9.43	9.41	10.14	10.08	10.47	10.42													YNR066C	>0.9999	YER149C	>0.9999	YFR055W	>0.9999	YER049W	>0.9999
YER082C	9	8.38	8.73	8.21	7.97	8.23	7.63	7.63	8.2	8.95	8.34	8.52	8.53	8.31	7.42	7.32													YJL170C	>0.9999	YLR179C	>0.9999	YDR282C	>0.9999	YML105C	>0.9999
YER083C	8.96	9.16	8.93	8.94	8.99	9.07	8.93	8.97	9.32	9.11	8.91	8.91	9.06	8.98	9.05	9.04													YPL095C	>0.9999	YGL220W	0.7576	YPR022C	>0.9999	YHR149C	>0.9999
YER085C	2.92	3.5	3.79	3.23	3.85	3.22	3.17	3.38	2.97	3.68	3.63	3.56	3.31	2.92	3.07	3.15													YLR128W	>0.9999	YCR004C	>0.9999	YNL302C	>0.9999	YOR284W	>0.9999
YER086W	10.48	11	10.71	10.79	10.56	10.54	10.87	10.51	10.19	10.68	10.34	10.26	10.61	10.75	10.59	10.48													YKL057C	>0.9999	YOR156C	0.6866	YOR275C	>0.9999	YDR438W	>0.9999
YER087C-B	9.52	9.46	9.64	9.6	9.7	9.83	9.69	9.68	9.3	9.71	9.9	9.84	9.77	9.78	9.66	9.64													YDR377W	>0.9999	YGL227W	>0.9999	YLL048C	>0.9999	YJL130C	>0.9999
YER087W	6.63	6.73	6.72	6.85	6.72	6.58	6.81	6.73	6.7	6.68	6.87	6.89	6.9	7.02	6.83	6.83													YDR376W	>0.9999	YJR098C	>0.9999	YMR077C	>0.9999	YHR014W	>0.9999
YER088C	9.62	9.84	9.74	9.53	10.49	10.05	9.81	9.8	10.05	9.7	9.19	9.07	10.09	10.27	9.84	9.73													YMR275C	>0.9999	YNL022C	>0.9999	YDL188C	>0.9999	YER188C-A	>0.9999
YER089C	9.41	9.54	9.34	9.36	9.33	9.45	9.29	9.24	9.45	9.22	9.01	8.97	9.33	9.32	9.23	9.12													YGL064C	>0.9999	YDR034C	0.5744	YBR049C	>0.9999	YKR037C	>0.9999
YER090W	9.11	9.59	9.67	9.7	9.16	9.49	9.81	9.29	9.27	9.06	9.3	9.19	9.31	9.32	9.24	8.98													YGL095C	>0.9999	YDR041W	0.8766	YPL263C	>0.9999	YAR014C	>0.9999
YER091C	12.92	12.9	12.82	12.9	12.89	12.86	12.82	12.86	12.76	12.91	12.73	12.68	12.79	12.79	12.84	12.83													YOR002W	>0.9999	YDR292C	>0.9999	YLR228C	>0.9999	YNR075W	0.8529
YER092W	7.61	7.39	7.04	7.44	7.78	7.99	7.64	7.51	8.17	7.48	7.65	7.78	7.97	7.89	7.71	7.54													YNL310C	>0.9999	YMR205C	0.9526	YOR099W	>0.9999	YOR245C	>0.9999
YER093C	7.66	7.51	7.45	7.27	7.7	7.46	7.37	7.37	7.72	7.58	7.17	7.23	7.96	7.78	7.33	7.37													YOR125C	>0.9999	YKL048C	>0.9999	YHR178W	>0.9999	YFR051C	>0.9999
YER093C-A	6.41	6.62	7.09	7.02	6.93	7.1	7.11	7.05	7.09	6.34	6.37	6.42	5.93	6.1	7.4	7.44													YKL219W	>0.9999	YLR172C	0.9875	YER049W	>0.9999	YPL149W	>0.9999
YER094C	9.51	9.53	9.41	9.62	9.34	9.45	9.55	9.57	9.51	9.52	9.92	9.86	9.15	9.28	9.59	9.56													YLR370C	>0.9999	YJR122W	>0.9999	YML105C	>0.9999	YBR262C	>0.9999
YER095W	8.06	8.02	8.01	8.3	8.18	8.35	8.45	8.33	8.04	8.15	8.24	8.23	7.68	8.01	8.48	8.44													YDL198C	>0.9999	YLR382C	>0.9999	YHR149C	>0.9999	YPL223C	>0.9999
YER096W	5.72	5.84	4.91	4.84	6.19	6.4	4.98	5.02	5.9	5.61	4.19	4.21	5.47	5.45	4.79	4.76													YLR433C	>0.9999	YKR010C	>0.9999	YOR284W	>0.9999	YGR215W	>0.9999
YER098W	5.84	5.92	5.56	5.86	6.46	5.89	5.94	6.02	6.27	6.03	5.92	5.99	6.41	6.61	5.87	6.08													YPR056W	>0.9999	YIL026C	>0.9999	YDR438W	>0.9999	YDL107W	>0.9999
YER099C	7.96	8.14	8.02	7.92	7.57	7.78	7.68	7.85	7.87	7.9	8.16	8.2	7.74	7.88	7.84	7.87													YLR204W	>0.9999	YPR067W	>0.9999	YJL130C	>0.9999	YBR089C-A	>0.9999
YER100W	8.1	8.06	8.05	8.11	7.94	8.06	7.83	8.08	8.02	7.89	8.24	8.17	7.66	7.84	8.05	8.09													YIL023C	>0.9999	YJL062W-A	>0.9999	YER188C-A	0.2091	YPR121W	>0.9999
YER101C	6.03	6.43	5.76	6.1	6.28	6.29	6.46	6.09	6.22	6.29	6.3	6.19	6.23	6.6	6.34	6.41													YOL006C	>0.9999	YKR026C	>0.9999	YKR037C	>0.9999	YDR255C	>0.9999
YER102W	11.86	11.97	12.15	12.14	11.56	11.61	12	12.11	11.46	11.92	12.46	12.44	11.68	11.85	12.06	12.05													YDL090C	>0.9999	YFR055W	>0.9999	YAR014C	>0.9999	YCR088W	>0.9999
YER103W	8.4	8.84	7.23	7.53	9.63	9.66	8.01	7.89	9.25	8.67	7.82	7.66	9.32	9.68	8.3	8.24													YOL084W	0.9254	YDR282C	>0.9999	YNR075W	0.9565	YNL086W	>0.9999
YER104W	6.05	5.87	5.74	5.93	5.8	5.83	5.93	5.93	5.77	5.95	6.01	6.1	5.8	5.76	5.96	5.98													YHR068W	>0.9999	YPR022C	>0.9999	YOR245C	>0.9999	YDR381C-A	>0.9999
YER105C	9.3	9.46	9.24	9.17	9.25	9.16	9.05	8.99	9.39	9.35	8.84	8.79	9.77	9.51	8.96	8.87													YJR132W	>0.9999	YNL302C	>0.9999	YFR051C	>0.9999	YER081W	>0.9999
YER106W	5.04	4.65	5.32	4.96	5.91	5.22	4.99	5.04	5.03	5.23	4.64	4.88	4.67	4.48	5.03	5.11													YBR260C	>0.9999	YCR046C	0.9967	YOR008C-A	>0.9999	YPL128C	>0.9999
YER107C	8.73	8.94	9.01	8.8	8.78	8.8	8.74	8.73	8.73	8.78	8.99	9.08	9.02	8.99	8.68	8.78													YPL110C	>0.9999	YOR275C	>0.9999	YPL149W	>0.9999	YIL144W	>0.9999
YER109C	7	6.8	6.75	6.64	7.04	6.77	6.56	6.57	6.69	7.13	6.42	6.3	7.2	7	6.57	6.63													YKL077W	>0.9999	YLL048C	0.9917	YBR262C	>0.9999	YDR067C	>0.9999
YER110C	10.25	10.34	10.33	10.01	9.7	9.87	9.65	9.73	9.84	10.61	9.68	9.59	10.2	10.24	9.71	9.61													YBR251W	>0.9999	YMR077C	>0.9999	YPL223C	0.0821	YJL136C	>0.9999
YER111C	7.62	7.48	7.35	7.4	7.74	7.4	7.43	7.5	7.2	7.53	7.46	7.39	7.56	7.42	7.17	7.41													YAR020C	>0.9999	YDL188C	>0.9999	YGR215W	0.9867	YDR135C	>0.9999
YER112W	9.44	8.88	8.89	8.91	9.33	9.32	8.9	8.82	9.24	9.26	8.67	8.71	9.21	9.09	8.75	8.71													YBR026C	>0.9999	YBR049C	>0.9999	YDL107W	>0.9999	YDR518W	>0.9999
YER113C	7.25	7.58	7.53	7.59	7.37	7.58	7.75	7.51	7.2	7.5	7.87	7.78	7.03	7.44	7.67	7.46													YLR002C	>0.9999	YPL263C	>0.9999	YBR089C-A	>0.9999	YLR344W	>0.9999
YER114C	8.51	8.73	8.5	8.31	8.15	8.16	8.04	8.12	8.17	8.41	8.11	7.93	8.4	8.29	8.01	8.01													YDR525W-A	>0.9999	YLR228C	>0.9999	YPR121W	>0.9999	YML110C	>0.9999
YER115C	7.55	7.78	7.35	7.54	7.72	7.67	7.46	7.3	7.76	7.81	7.52	7.47	7.76	7.84	7.59	7.4													YPL085W	>0.9999	YOR099W	>0.9999	YDR255C	0.5489	YGL230C	>0.9999
YER116C	6.15	7.01	6.2	6.21	6.15	5.82	6.33	6.2	6.25	6.22	6.28	6.35	6.46	6.54	6.36	6.19													YML091C	>0.9999	YHR178W	>0.9999	YCR088W	>0.9999	YGR184C	>0.9999
YER117W	11.53	11.51	11.54	11.69	11.8	11.81	11.73	11.63	11.77	11.64	11.81	11.73	11.53	11.81	11.74	11.67													YNL283C	>0.9999	YER049W	>0.9999	YNL086W	>0.9999	YLR368W	>0.9999
YER118C	8.29	8.23	8.29	8.26	7.83	8.05	7.94	8	8.07	8.26	8.1	8.13	8.03	7.98	8.07	8.05													YOL068C	>0.9999	YML105C	>0.9999	YDR381C-A	>0.9999	YER184C	>0.9999
YER119C	7.73	8.19	7.72	8.11	8.23	8.27	8.33	8.41	8.66	7.69	7.9	7.9	8.15	8.16	8.47	8.46													YHR006W	>0.9999	YHR149C	>0.9999	YER081W	>0.9999	YJL080C	>0.9999
YER120W	10.71	11.18	10.84	10.88	10.59	10.64	10.77	10.91	10.65	10.85	11	11.02	10.65	10.82	10.89	10.86													YCR083W	>0.9999	YOR284W	0.6866	YPL128C	>0.9999	YGR174W-A	>0.9999
YER122C	9.52	9.37	9.52	9.56	9.6	9.64	9.46	9.47	9.41	9.55	9.6	9.4	9.66	9.65	9.45	9.35													YGR067C	>0.9999	YDR438W	0.2777	YIL144W	>0.9999	YOL086C	>0.9999
YER123W	7.07	6.71	7.32	7.24	7.07	6.99	7.25	7.13	6.98	7.07	6.98	6.92	6.84	6.87	7.08	7.14													YMR122W-A	>0.9999	YKR037C	0.9946	YDR067C	>0.9999	YNL106C	>0.9999
YER124C	9.14	9.07	9.47	9.37	9.28	9.1	9.49	9.51	9.16	9.09	9.3	9.19	9.31	9.06	9.34	9.15													YMR027W	>0.9999	YAR014C	0.7576	YJL136C	>0.9999	YMR004W	>0.9999
YER125W	9.69	9.78	9.62	9.49	9.79	9.7	9.45	9.31	9.56	9.6	9.36	9.19	9.48	9.45	9.2	9.24													YHL022C	>0.9999	YOR245C	>0.9999	YDR135C	>0.9999	YAR002W	>0.9999
YER126C	10.21	9.78	10.14	9.68	9.32	9.89	9.21	9.2	9.94	10.19	9.76	9.82	9.27	9.19	9.06	9													YBL049W	>0.9999	YFR051C	>0.9999	YDR518W	>0.9999	YNR018W	>0.9999
YER127W	8.98	9.03	8.72	8.28	7.97	8.31	7.51	7.4	8.1	9.17	8.48	8.61	8.43	8.05	7.19	7.18													YGL057C	>0.9999	YOR008C-A	>0.9999	YLR344W	>0.9999	YEL064C	>0.9999
YER128W	6.51	6.31	6.43	6.36	6.46	6.46	6.48	6.24	6.38	6.62	6.45	6.51	6.17	6.36	6.33	6.15													YML059C	>0.9999	YPL149W	0.9203	YML110C	0.6792	YOR315W	0.9592
YER129W	7.65	7.5	7.45	7.46	7.44	7.32	7.34	7.36	7.15	7.66	7.2	7.12	7.8	7.59	7.26	7.3													YDL100C	>0.9999	YBR262C	>0.9999	YGL230C	>0.9999	YLR090W	>0.9999
YER130C	6.62	6.79	7.08	6.93	7.09	6.84	7.28	7.3	6.98	6.83	7.49	7.33	7.18	7.2	7.39	7.49													YLR126C	>0.9999	YPL223C	>0.9999	YGR184C	>0.9999	YLR319C	>0.9999
YER131W	12.04	12.29	12.07	12.01	11.86	11.87	11.94	12.05	11.58	12.19	12.17	12.22	12.11	12.08	12.06	12.07													YLR262C	>0.9999	YGR215W	>0.9999	YLR368W	>0.9999	YOL032W	>0.9999
YER132C	8.07	7.94	7.91	7.61	8.32	7.91	7.65	7.65	8.36	8.17	7.1	7.13	8.25	8.09	7.76	7.72													YDR245W	>0.9999	YDL107W	0.3047	YER184C	>0.9999	YDR246W	>0.9999
YER133W	10.12	9.56	10.06	10.25	10.31	10.34	10.27	10.23	10.41	9.81	10.29	10.35	10.22	10.45	10.19	10.17													YER187W	>0.9999	YBR089C-A	>0.9999	YJL080C	>0.9999	YER115C	>0.9999
YER134C	7.7	7.85	7.55	7.83	7.64	7.87	7.98	7.97	7.41	7.57	8.13	8.12	7.22	7.67	8.07	8.04													YIL088C	>0.9999	YPR121W	0.9994	YGR174W-A	>0.9999	YBR043C	0.3029
YER136W	9.44	9.24	9.15	9.61	9.26	9.49	9.6	9.45	9.46	9.03	9.48	9.3	8.6	8.94	9.54	9.32													YNL206C	0.9997	YDR255C	>0.9999	YOL086C	>0.9999	YNL270C	>0.9999
YER137C	7.2	7.51	7.21	6.78	7.21	7.1	6.33	6.27	6.69	7.43	7	7.17	7.37	7.24	5.96	6.08													YER010C	>0.9999	YCR088W	0.9378	YNL106C	>0.9999	YGL126W	>0.9999
YER138W-A	11.86	11.79	11.13	11.19	11.78	11.82	11.14	11.17	11.96	11.72	10.8	10.8	11.66	11.12	11.19	11.07													YDR088C	>0.9999	YNL086W	>0.9999	YMR004W	>0.9999	YJR094W-A	>0.9999
YER139C	5.97	6.27	5.93	6.07	5.47	5.49	5.74	6.01	5.16	5.92	6.32	6.31	5.58	5.51	5.86	5.91													YOR110W	>0.9999	YDR381C-A	>0.9999	YAR002W	>0.9999	YGL251C	>0.9999
YER140W	6.64	6.61	7.09	6.86	6.6	6.34	6.79	6.82	6.5	6.57	6.69	6.63	6.66	6.53	6.86	6.83													YNL213C	>0.9999	YER081W	>0.9999	YNR018W	>0.9999	YDR409W	>0.9999
YER141W	8.53	8.99	8.67	8.9	9.41	9.45	9.36	9.41	8.77	8.5	8.85	8.69	9.21	9.35	9.43	9.45													YLR367W	>0.9999	YPL128C	>0.9999	YEL064C	>0.9999	YJL055W	>0.9999
YER142C	7.16	7.12	6.87	6.98	7.31	7.2	6.97	7.12	7.85	7.29	7.43	7.5	6.94	7.06	7.19	7.41													YKR077W	>0.9999	YIL144W	>0.9999	YOR315W	>0.9999	YER064C	0.9998
YER143W	7.07	7.12	6.88	7.1	6.79	7.05	6.91	6.92	7.48	6.99	7.02	6.91	6.94	6.97	7.04	6.97													YKL035W	>0.9999	YDR067C	>0.9999	YLR090W	>0.9999	YDL135C	>0.9999
YER144C	7.59	8.07	7.66	7.49	7.51	7.06	7.68	7.73	7.91	7.72	7.43	7.46	7.73	7.44	7.73	7.79													YOR274W	>0.9999	YJL136C	>0.9999	YLR319C	>0.9999	YGR104C	>0.9999
YER145C	9.85	9.8	9.15	8.39	10.51	10.21	8.83	9.36	10	9.68	9.12	9.07	10.37	10.34	9.54	9.38													YLR225C	>0.9999	YDR135C	>0.9999	YOL032W	>0.9999	YOR386W	>0.9999
YER146W	9.06	9.1	9.16	8.96	9.48	9.43	9.09	9.1	9.55	9.29	9.4	9.48	9.38	9.59	9.11	9.09													YFR016C	>0.9999	YDR518W	>0.9999	YDR246W	>0.9999	YHL016C	0.1006
YER147C	7.55	7.87	7.22	7.17	7.28	7.48	6.91	6.94	8.11	7.32	7.17	7.34	7.4	7.49	6.93	6.81													YHR043C	0.6239	YLR344W	>0.9999	YER115C	>0.9999	YKL139W	>0.9999
YER148W	8.07	7.53	8.11	8.15	7.76	7.96	7.83	7.93	7.44	7.78	8.13	8.13	7.29	7.31	7.87	7.88													YPL006W	>0.9999	YML110C	>0.9999	YBR043C	>0.9999	YDR138W	>0.9999
YER148W	10	9.67	9.75	9.64	9.87	9.95	9.7	9.69	9.8	9.93	9.92	10.08	9.83	9.87	9.59	9.57													YCR035C	>0.9999	YGR184C	0.5001	YNL270C	>0.9999	YDL042C	>0.9999
YER148W	10.11	9.76	9.92	9.87	9.91	9.99	9.79	9.85	9.78	9.99	10.06	10.07	9.84	9.85	9.76	9.75													YHL017W	>0.9999	YLR368W	>0.9999	YGL126W	>0.9999	YBL085W	>0.9999
YER148W	9.61	9.35	9.58	9.5	9.34	9.55	9.35	9.48	8.99	9.61	9.83	9.9	9.34	9.46	9.3	9.33													YDR303C	>0.9999	YER184C	>0.9999	YJR094W-A	>0.9999	YGR155W	>0.9999
YER149C	7.46	7.35	7.56	7.42	7.14	7.34	7.29	7.33	7.71	7.43	7.51	7.53	7.45	7.16	7.42	7.35													YKL053C-A	>0.9999	YJL080C	>0.9999	YGL251C	0.9565	YNL275W	>0.9999
YER150W	6.84	7.27	6.31	6.49	7.59	7.42	7.31	6.96	8.23	6.39	6.25	6.13	6.45	7.04	7.2	6.78													YNR019W	>0.9999	YGR174W-A	>0.9999	YDR409W	>0.9999	YNL096C	>0.9999
YER151C	9.47	9.43	9.16	8.97	9.35	9.08	8.79	8.8	9.17	9.58	8.93	8.7	9.59	9.33	8.72	8.77													YBR103W	>0.9999	YOL086C	>0.9999	YJL055W	>0.9999	YNR066C	>0.9999
YER152C	8.93	9.55	8.9	8.97	9.16	9.08	8.85	8.84	9.45	8.93	8.86	8.77	9.2	8.97	9.02	9.01													YOR290C	>0.9999	YNL106C	0.1219	YER064C	>0.9999	YJL170C	>0.9999
YER153C	4.81	4.77	5.39	5.46	5.45	5.47	5.47	5.34	4.64	4.26	4.95	5.07	4.28	4.74	5.41	5.7													YCR047C	>0.9999	YMR004W	>0.9999	YDL135C	>0.9999	YPL095C	0.5737
YER154W	8.94	9.16	9.17	9.07	9.07	8.95	8.98	9.03	8.88	9.06	9.05	8.99	9.02	9.16	9.04	9.1													YDR085C	>0.9999	YAR002W	>0.9999	YGR104C	>0.9999	YLR128W	>0.9999
YER155C	9.58	9.57	9.27	9.27	9.7	9.36	9.2	9.12	9.55	9.65	9.04	8.85	9.96	9.62	9.07	9.08													YNL176C	>0.9999	YNR018W	>0.9999	YOR386W	0.8515	YKL057C	>0.9999
YER156C	9.09	9.25	9.52	9.36	8.96	9.19	9.09	9.16	8.86	9.14	9.48	9.52	9.38	9.42	9.12	9.05													YHR021W-A	>0.9999	YEL064C	>0.9999	YHL016C	>0.9999	YDR377W	>0.9999
YER157W	7.1	7.29	7.36	7.34	7	6.87	7.38	7.47	7.21	7.21	7.58	7.59	7.78	7.56	7.32	7.51													YEL034W	>0.9999	YOR315W	>0.9999	YKL139W	>0.9999	YDR376W	>0.9999
YER158C	7.47	7.9	6.68	6.85	8.38	7.94	7.7	7.69	8.25	7.86	7	6.61	8.12	8.12	7.95	7.66													YGL231C	>0.9999	YLR090W	>0.9999	YDR138W	>0.9999	YMR275C	>0.9999
YER159C	9.46	9.29	8.82	9.02	9.58	9.46	9.04	8.93	9.5	9.4	9.01	9.02	9.69	9.66	8.94	8.79													YEL017C-A	>0.9999	YLR319C	>0.9999	YDL042C	>0.9999	YGL064C	>0.9999
YER161C	6.99	6.72	7.03	7.04	6.78	6.62	6.79	6.99	6.83	6.86	6.96	7.02	7.03	7.03	6.93	6.98													YOL143C	>0.9999	YDR246W	>0.9999	YBL085W	>0.9999	YGL095C	>0.9999
YER162C	5.94	6.4	5.72	6.15	6.41	6.39	6.12	6.04	6.16	6.33	6.13	6.04	6.35	6.42	6.06	5.98													YBR132C	>0.9999	YER115C	>0.9999	YGR155W	>0.9999	YOR002W	>0.9999
YER163C	7.79	8.59	7.86	8.06	8.44	8.31	8.36	8.23	8.49	8.01	8.43	8.42	8.46	8.57	8.43	8.5													YIL003W	>0.9999	YNL270C	>0.9999	YNL275W	>0.9999	YNL310C	>0.9999
YER164W	9.04	9.14	8.73	8.58	8.89	8.33	8.37	8.36	8.66	8.83	8.06	8.12	8.57	8.65	8.25	8.25													YMR140W	>0.9999	YGL126W	>0.9999	YNL096C	>0.9999	YOR125C	>0.9999
YER165W	11.95	12.01	11.76	11.73	11.73	11.67	11.62	11.61	11.65	12.01	11.54	11.49	11.77	11.81	11.67	11.68													YHR038W	>0.9999	YJR094W-A	>0.9999	YJL170C	0.9815	YKL219W	>0.9999
YER166W	9.66	9.64	9.2	9.4	9.84	9.62	9.35	9.2	9.79	9.57	8.84	8.78	9.93	9.74	9.28	9.25													YDL229W	>0.9999	YGL251C	0.2072	YPL095C	0.5815	YLR370C	>0.9999
YER167W	9.25	9.44	8.8	8.82	9.39	9.16	8.8	8.74	9.69	9.25	8.65	8.57	9.32	9.29	8.78	8.77													YHR090C	>0.9999	YJL055W	>0.9999	YLR128W	>0.9999	YDL198C	>0.9999
YER168C	7.51	7.74	7.65	7.6	7.18	7.41	7.46	7.36	7.32	7.34	7.81	7.84	7.11	7.41	7.41	7.41													YLR110C	>0.9999	YDL135C	0.2072	YKL057C	>0.9999	YLR433C	>0.9999
YER169W	8.2	8.09	8.12	7.41	7.33	7.49	7.13	6.97	8.01	8.1	7.17	7.02	7.55	7.36	7.03	7.02													YPR164W	>0.9999	YGR104C	>0.9999	YDR377W	>0.9999	YPR056W	>0.9999
YER170W	5.37	5.3	5.44	5.88	5.64	5.66	5.87	5.99	4.95	5.32	6.22	6.12	5.36	5.73	6.09	6.01													YKR023W	>0.9999	YOR386W	>0.9999	YDR376W	>0.9999	YLR204W	>0.9999
YER171W	7.59	8.04	7.89	7.69	7.45	7.41	7.59	7.66	7.04	7.6	7.75	7.61	7.8	7.89	7.56	7.52													YDR523C	>0.9999	YHL016C	>0.9999	YMR275C	>0.9999	YIL023C	>0.9999
YER172C	8.57	8.57	8.3	8.24	8.52	8.29	8.12	8.17	8.22	8.64	7.97	7.99	8.9	8.66	8.02	8.11													YJL193W	>0.9999	YKL139W	>0.9999	YGL064C	>0.9999	YOL006C	>0.9999
YER173W	6.58	6.78	6.55	6.66	6.6	6.37	6.52	6.46	6.55	6.76	6.45	6.51	6.91	6.85	6.48	6.46													YPR191W	>0.9999	YDR138W	0.9997	YGL095C	>0.9999	YDL090C	>0.9999
YER174C	7.51	7.66	8.04	8.66	7.38	7.89	8.04	7.7	7.82	7.68	8.23	8.19	7.12	7.2	7.49	7.48													YPR133W-A	>0.9999	YDL042C	>0.9999	YOR002W	>0.9999	YHR068W	>0.9999
YER175C	6.7	6.84	6.98	7.44	6.75	7.04	8.05	7.15	7.46	6.3	6.43	6.7	6.37	6.76	7.26	6.49													YLR307C-A	>0.9999	YBL085W	>0.9999	YNL310C	>0.9999	YJR132W	>0.9999
YER175W-A	2.37	1.94	1.96	2.07	2.16	1.49	1.85	2.06	1.87	1.69	1.71	2.14	2.13	1.89	2.11	1.58													YDR231C	>0.9999	YGR155W	>0.9999	YOR125C	>0.9999	YBR260C	>0.9999
YER176W	8	8.05	7.83	7.51	7.89	7.63	7.45	7.43	7.79	8.07	7.28	7.33	8.05	7.79	7.47	7.54													YNR027W	>0.9999	YNL275W	>0.9999	YKL219W	>0.9999	YPL110C	>0.9999
YER177W	12.46	12.44	12.12	12.2	12.53	12.54	12.17	12.21	12.44	12.41	12.25	12.25	12.39	12.41	12.2	12.3													YML092C	>0.9999	YNL096C	>0.9999	YLR370C	>0.9999	YKL077W	>0.9999
YER178W	11.81	12.18	11.7	11.78	11.57	11.49	11.66	11.8	12.04	11.79	11.88	11.79	11.75	11.79	11.79	11.77													YLR388W	>0.9999	YJL170C	>0.9999	YDL198C	>0.9999	YBR251W	>0.9999
YER179W	3.8	4.13	3.78	3.51	4.3	4.08	3.58	3.63	3.75	4.09	4	4.01	4.09	4.14	3.5	3.51													YHR159W	>0.9999	YLR128W	>0.9999	YLR433C	>0.9999	YAR020C	>0.9999
YER180C	7.83	7.89	7.62	7.62	7.84	7.64	7.38	7.57	7.61	7.89	7.41	7.45	8.03	7.92	7.59	7.69													YCR005C	>0.9999	YKL057C	>0.9999	YPR056W	>0.9999	YBR026C	>0.9999
YER180C-A	4.34	4.01	4.01	4.05	3.91	3.99	3.82	3.86	3.57	4.15	4.26	4.37	4	4.19	3.67	3.91													YLR003C	>0.9999	YDR377W	0.6866	YLR204W	>0.9999	YLR002C	>0.9999
YER182W	7.48	7.47	7.45	7.73	7.95	8.17	7.73	7.58	8.13	7.62	7.62	7.64	7.78	8.1	7.66	7.53													YBL039C	>0.9999	YDR376W	>0.9999	YIL023C	>0.9999	YDR525W-A	>0.9999
YER183C	7.9	7.87	8.18	8.13	8.01	8.14	8.27	8.26	8.13	7.98	8.47	8.53	7.64	7.78	8.32	8.25													YMR146C	>0.9999	YMR275C	>0.9999	YOL006C	>0.9999	YPL085W	>0.9999
YER184C	4.32	4.27	4.13	4.19	4.06	3.89	4.28	4.28	3.76	4.05	3.93	4.13	4.05	4.09	4.31	4.33													YOR103C	>0.9999	YGL064C	>0.9999	YDL090C	>0.9999	YML091C	>0.9999
YER185W	4.37	4.12	5.24	4.79	4.75	3.71	5.2	4.96	4.45	4.4	4.6	4.66	4.26	4.14	5.07	4.66													YMR197C	>0.9999	YGL095C	>0.9999	YOL084W	0.0743	YNL283C	>0.9999
YER186C	6.41	6.87	6.44	6.72	6.63	6.43	6.73	6.65	6.84	6.7	6.67	6.8	6.75	6.69	6.89	6.81													YDL053C	>0.9999	YOR002W	>0.9999	YHR068W	>0.9999	YOL068C	>0.9999
YER187W	4.61	5.37	4.99	4.83	5.27	4.95	5.34	5.58	4.73	5.06	5.25	5.14	5.41	5.28	5.73	5.88													YDR034C-A	>0.9999	YNL310C	>0.9999	YJR132W	>0.9999	YHR006W	>0.9999
YER188C-A	5.89	5.92	5.88	5.41	6.9	6.06	5.57	5.73	6.22	6.05	4.95	4.85	5.85	5.64	5.88	5.73													YBR173C	>0.9999	YOR125C	0.4293	YBR260C	0.9138	YCR083W	>0.9999
YFL001W	7.52	7.22	7.77	7.41	7.22	7.2	7.24	7.25	7.44	7.55	7.45	7.59	7.34	7.35	7.18	7.1													YBR097W	>0.9999	YKL219W	>0.9999	YPL110C	>0.9999	YGR067C	>0.9999
YFL002C	8.19	8.05	8.07	7.88	7.76	7.81	7.62	7.58	7.67	8.24	8.05	8.08	8.01	8.07	7.55	7.58													YHR005C-A	>0.9999	YLR370C	>0.9999	YKL077W	>0.9999	YMR122W-A	>0.9999
YFL003C	4.26	4.43	4.38	3.92	4.7	4.26	4.53	4.38	4.25	4.52	4.39	4.37	4.52	4.43	4.35	4.42													YLR427W	>0.9999	YDL198C	0.7576	YBR251W	>0.9999	YMR027W	>0.9999
YFL004W	10.14	9.5	10.24	10.02	9.69	10.02	9.6	10.26	9.81	9.98	9.85	9.74	10.04	9.74	10.04	10.1													YEL018W	>0.9999	YLR433C	>0.9999	YAR020C	>0.9999	YHL022C	0.5737
YFL005W	9.26	9.09	9.36	9.54	9.36	9.51	9.53	9.48	9.46	9.26	9.71	9.71	8.84	9.24	9.49	9.45													YKL017C	>0.9999	YPR056W	0.4642	YBR026C	>0.9999	YBL049W	0.6244
YFL007W	8.82	8.86	8.82	8.74	8.99	9.01	8.65	8.56	9.22	8.65	8.13	8.13	8.62	8.63	8.55	8.74													YLR432W	>0.9999	YLR204W	>0.9999	YLR002C	>0.9999	YGL057C	>0.9999
YFL008W	8.6	8.03	8.09	8.27	8.62	8.33	8.17	8.2	8.17	8.68	7.95	7.89	8.3	8.25	8.25	8.22													YDR110W	>0.9999	YIL023C	>0.9999	YDR525W-A	>0.9999	YML059C	>0.9999
YFL009W	8.22	8.11	8.31	8.25	8.15	7.98	8.3	8.27	8	8.1	8.1	8.08	8.22	8.09	8.23	8.22													YGR061C	>0.9999	YOL006C	>0.9999	YPL085W	>0.9999	YDL100C	>0.9999
YFL010C	10.15	10.38	10.03	10.22	10.33	10.16	10.32	10.27	10.55	10.1	10.16	10.12	10.35	10.2	10.41	10.38													YGR056W	>0.9999	YDL090C	>0.9999	YML091C	>0.9999	YLR126C	>0.9999
YFL010W-A	6.76	6.52	6.7	6.32	6.98	7.04	6.97	6.71	7.69	6.27	6.15	6.09	7.02	6.91	6.65	6.57													YOR320C	>0.9999	YOL084W	>0.9999	YNL283C	>0.9999	YLR262C	>0.9999
YFL011W	3.59	3.34	4.18	3.25	4.53	4.47	3.95	3.47	4.14	3.62	3.11	3.12	3.22	3.8	3.97	4.17													YAL040C	>0.9999	YHR068W	>0.9999	YOL068C	>0.9999	YDR245W	>0.9999
YFL012W	4.71	4.09	5.1	4.73	4.99	4.74	5.07	4.95	4.97	4.31	4.1	4.2	3.79	3.61	4.94	4.94													YKL190W	>0.9999	YJR132W	0.7478	YHR006W	>0.9999	YER187W	0.9994
YFL013C	8.29	8.28	8	8.09	8.29	8.2	7.86	7.89	8.17	8.3	7.99	7.98	8.26	8.26	7.84	7.82													YGL236C	>0.9999	YBR260C	0.4703	YCR083W	>0.9999	YIL088C	>0.9999
YFL014W	11.46	12.2	11.12	11.9	12.09	11.85	11.63	11.6	11.23	11.22	11.08	11.52	10.4	11.22	10.95	10.43													YBR135W	>0.9999	YPL110C	>0.9999	YGR067C	0.8515	YNL206C	>0.9999
YFL016C	9.14	9.52	8.49	9.05	9.57	9.52	8.94	8.81	9.41	9.26	9.03	9.13	9.42	9.72	9.03	9.08													YDL128W	>0.9999	YKL077W	>0.9999	YMR122W-A	>0.9999	YER010C	>0.9999
YFL017C	9.01	8.9	8.81	8.86	9.49	9.47	9.18	9.15	9.47	9.07	9.01	9.03	9.54	9.4	9.37	9.18													YJR153W	>0.9999	YBR251W	>0.9999	YMR027W	>0.9999	YDR088C	>0.9999
YFL017W-A	8.51	8.63	8.4	8.46	8.51	8.61	8.6	8.53	8.96	8.75	8.76	8.68	8.77	8.6	8.56	8.48													YMR105C	>0.9999	YAR020C	>0.9999	YHL022C	>0.9999	YOR110W	>0.9999
YFL018C	11.38	11.67	11.1	11.21	11.3	11.23	11.06	11.12	11.44	11.53	11.17	11.15	11.37	11.45	11.15	11.07													YPR108W-A	>0.9999	YBR026C	0.5043	YBL049W	>0.9999	YNL213C	>0.9999
YFL020C	5.1	5.54	5.36	5.22	6.09	5.61	5.73	5.47	6.27	5.21	4.63	4.71	5.32	5.53	5.71	5.54													YOL013C	>0.9999	YLR002C	>0.9999	YGL057C	>0.9999	YLR367W	>0.9999
YFL020C	5.09	5.56	5.36	5.33	6.08	5.68	5.75	5.46	6.29	5.35	4.56	4.65	5.5	5.7	5.7	5.65													YLR109W	>0.9999	YDR525W-A	>0.9999	YML059C	>0.9999	YKR077W	>0.9999
YFL021W	9.19	9.11	9.26	9.58	10.37	9.81	10.03	9.95	10.14	9.04	8.83	8.95	9.65	9.6	10.18	10.05													YLL028W	>0.9999	YML091C	>0.9999	YDL100C	>0.9999	YKL035W	>0.9999
YFL022C	10.63	10.68	10.59	10.54	10.44	10.58	10.45	10.44	10.35	10.69	10.3	10.15	10.15	10.2	10.45	10.41													YGR046W	>0.9999	YNL283C	0.5391	YLR126C	>0.9999	YOR274W	>0.9999
YFL023W	8.65	8.45	8.27	7.68	7.87	7.82	7.31	7.35	7.72	8.62	7.5	7.54	8.21	7.87	7.27	7.29													YNL326C	>0.9999	YOL068C	>0.9999	YLR262C	>0.9999	YLR225C	>0.9999
YFL024C	7.85	7.58	7.46	7.55	7.83	7.59	7.42	7.25	7.67	7.93	7.48	7.52	8.05	7.86	7.25	7.02													YGR230W	>0.9999	YHR006W	>0.9999	YDR245W	>0.9999	YFR016C	>0.9999
YFL025C	8.04	8.05	8.31	8.21	8.11	8	8.38	8.24	8.12	7.92	8.16	8.01	8.54	8.45	8.19	8.31													YIL135C	>0.9999	YCR083W	>0.9999	YER187W	>0.9999	YHR043C	>0.9999
YFL026W	5.24	5.77	5.29	5.31	5.65	5.16	5.2	5.09	5.51	5.52	5.05	5.06	5.28	5.48	5.16	5.06													YOR180C	>0.9999	YGR067C	>0.9999	YIL088C	>0.9999	YPL006W	>0.9999
YFL027C	6.78	6.8	7.02	6.93	6.77	6.69	7.01	7.2	7.04	6.75	6.82	6.71	6.6	6.57	7.13	6.98													YER065C	>0.9999	YMR122W-A	>0.9999	YNL206C	>0.9999	YCR035C	>0.9999
YFL028C	8.29	8.27	8.64	8.58	8.58	8.72	8.97	8.62	8.65	8.27	8.77	8.77	8.59	8.64	8.53	8.41													YDR388W	>0.9999	YMR027W	>0.9999	YER010C	>0.9999	YHL017W	>0.9999
YFL029C	6.52	6.92	6.37	6.54	6.47	6.41	6.39	6.41	6.64	6.83	6.67	6.71	6.55	6.7	6.54	6.54													YFR002W	>0.9999	YHL022C	>0.9999	YDR088C	>0.9999	YDR303C	>0.9999
YFL030W	5.74	6.49	5.83	6.31	6.27	5.99	6.66	6.35	6.7	6.15	6.13	6.17	5.73	5.99	6.74	6.33													YPL219W	>0.9999	YBL049W	>0.9999	YOR110W	>0.9999	YKL053C-A	>0.9999
YFL031W	9.81	10.51	9.69	10.23	10.35	10.41	10.33	9.99	10.57	9.16	10	10.17	9.83	10.07	10.47	10.39													YGL067W	>0.9999	YGL057C	>0.9999	YNL213C	>0.9999	YNR019W	>0.9999
YFL033C	7.51	7.87	7.07	7.04	7.71	7.32	7.34	7.4	7.5	7.7	7.14	7.12	8.02	7.91	7.45	7.31													YBR061C	>0.9999	YML059C	>0.9999	YLR367W	>0.9999	YBR103W	>0.9999
YFL034C-A	9.89	9.77	10.18	10.1	9.74	9.75	10.16	9.78	9.82	10.03	10.09	10.11	9.87	9.83	9.71	9.57													YDL127W	>0.9999	YDL100C	>0.9999	YKR077W	>0.9999	YOR290C	>0.9999
YFL034C-B	7.96	8.25	7.66	7.72	7.75	7.98	7.62	7.62	7.48	8.07	7.89	7.96	7.54	7.63	7.6	7.63													YGL139W	>0.9999	YLR126C	>0.9999	YKL035W	>0.9999	YCR047C	>0.9999
YFL034W	7.13	7.4	6.84	7	7.5	7.16	6.9	7.01	7.09	7.29	6.94	6.93	7.56	7.6	7.08	6.93													YGR208W	>0.9999	YLR262C	>0.9999	YOR274W	>0.9999	YDR085C	>0.9999
YFL036W	7.88	8.31	8.11	7.99	8.16	7.94	7.95	7.89	7.59	8.12	8.04	7.84	8.49	8.49	7.75	7.87													YNL129W	>0.9999	YDR245W	>0.9999	YLR225C	>0.9999	YNL176C	>0.9999
YFL037W	11.49	11.31	11.36	11.37	11.38	11.29	11.29	11.42	11.19	11.58	11.43	11.44	11.52	11.52	11.43	11.5													YPR074C	>0.9999	YER187W	>0.9999	YFR016C	>0.9999	YHR021W-A	>0.9999
YFL038C	10.92	10.88	10.4	10.66	10.97	10.98	10.64	10.6	11.06	10.9	10.91	10.85	10.78	11.03	10.65	10.61													YIL166C	>0.9999	YIL088C	>0.9999	YHR043C	>0.9999	YEL034W	>0.9999
YFL039C	12.33	12.38	12.37	12.36	12.21	12.19	12.36	12.37	12.24	12.33	12.33	12.32	12.06	12.19	12.37	12.39													YER017C	>0.9999	YNL206C	>0.9999	YPL006W	>0.9999	YGL231C	>0.9999
YFL039C	12.67	12.8	12.6	12.68	12.66	12.56	12.64	12.67	12.59	12.84	12.65	12.64	12.69	12.72	12.71	12.68													YNL047C	>0.9999	YER010C	>0.9999	YCR035C	>0.9999	YEL017C-A	>0.9999
YFL039C	11.55	11.54	11.87	11.89	11.48	11.43	11.75	11.8	11.3	11.47	11.9	11.97	10.93	11.42	11.76	11.8													YCR020C	>0.9999	YDR088C	>0.9999	YHL017W	>0.9999	YOL143C	>0.9999
YFL039C	12.69	12.77	12.59	12.66	12.64	12.57	12.65	12.65	12.6	12.84	12.6	12.61	12.67	12.69	12.68	12.65													YDR306C	>0.9999	YOR110W	>0.9999	YDR303C	>0.9999	YBR132C	>0.9999
YFL040W	3.11	2.29	3.77	4.1	3.72	3.96	3.55	3.54	4.25	2.57	2.39	2.71	2.31	2.65	3.74	3.84													YPL268W	>0.9999	YNL213C	>0.9999	YKL053C-A	>0.9999	YIL003W	>0.9999
YFL041W	8.15	8.51	8.53	8.46	8.04	8.12	8.21	8.35	8.38	8.27	8.6	8.55	8.65	8.7	8.27	8.26													YDR208W	>0.9999	YLR367W	>0.9999	YNR019W	>0.9999	YMR140W	>0.9999
YFL041W-A	5.3	5.43	5	5.5	5.74	5.62	5.9	5.82	6.04	5.16	4.8	5.04	5.28	5.41	5.99	5.82													YJL166W	>0.9999	YKR077W	>0.9999	YBR103W	>0.9999	YHR038W	>0.9999
YFL042C	7.77	8.11	7.69	7.8	8.01	7.93	7.97	7.9	8.68	7.88	7.63	7.64	8.07	7.97	7.94	7.92													YBR009C	>0.9999	YKL035W	>0.9999	YOR290C	>0.9999	YDL229W	>0.9999
YFL044C	6.89	6.92	6.5	6.73	6.45	6.74	6.37	6.42	7.24	6.85	6.89	6.91	6.38	6.48	6.62	6.51													YIR027C	>0.9999	YOR274W	>0.9999	YCR047C	>0.9999	YHR090C	>0.9999
YFL045C	11.54	11.43	11.58	11.59	11.45	11.52	11.44	11.54	11.18	11.63	11.68	11.62	11.41	11.42	11.54	11.56													YNR041C	>0.9999	YLR225C	>0.9999	YDR085C	>0.9999	YLR110C	>0.9999
YFL046W	7.72	7.44	7.52	7.66	8.03	7.96	7.91	7.84	7.79	7.79	7.71	7.8	8.18	8.11	7.96	7.83													YHR103W	>0.9999	YFR016C	0.887	YNL176C	>0.9999	YPR164W	>0.9999
YFL047W	6.77	7.11	6.85	7.04	6.86	7	6.98	6.89	6.91	6.76	6.82	6.69	6.85	6.91	7.08	7.04													YGR159C	>0.9999	YHR043C	0.7146	YEL034W	>0.9999	YKR023W	>0.9999
YFL048C	8.13	8.32	8.52	8.41	8.28	8.34	8.65	8.59	8.5	8.2	8.71	8.6	8.59	8.46	8.54	8.54													YML102W	>0.9999	YPL006W	0.6453	YGL231C	>0.9999	YDR523C	>0.9999
YFL049W	7.48	7.49	7.01	7.31	7.59	7.34	7.29	7.12	7.41	7.57	7.3	7.24	7.5	7.51	7.18	7.09													YBL090W	>0.9999	YCR035C	>0.9999	YEL017C-A	>0.9999	YJL193W	>0.9999
YFL050C	5.75	6.29	5.62	5.43	5.76	5.71	5.6	5.43	5.45	6.06	5.25	5.18	6.5	6.03	5.46	5.56													YER016W	>0.9999	YHL017W	>0.9999	YOL143C	>0.9999	YPR191W	>0.9999
YFL051C	3.3	2.79	2.86	3.27	3.76	3.16	3.52	3.03	3.45	2.65	2.48	2.56	2.02	2.01	3.52	3.29													YLR466C-B	>0.9999	YDR303C	>0.9999	YIL003W	>0.9999	YPR133W-A	>0.9999
YFL052W	3	3.11	3.04	2.46	2.93	2.17	2.69	2.99	2.74	2.9	2.83	2.81	2.62	2.65	2.53	2.65													YNR051C	>0.9999	YKL053C-A	>0.9999	YMR140W	>0.9999	YLR307C-A	>0.9999
YFL053W	3.46	4.35	3.19	3.37	3.7	3.08	2.93	3.29	2.57	3.69	3.43	3.66	3.16	3.4	3.14	3.2													YGR280C	>0.9999	YNR019W	>0.9999	YHR038W	>0.9999	YDR231C	>0.9999
YFL054C	6.19	7.39	5.89	6.47	6.68	6.63	6.49	6.44	7.6	6.25	6.3	6.34	6.41	6.55	6.45	6.53													YMR185W	>0.9999	YBR103W	>0.9999	YDL229W	>0.9999	YNR027W	>0.9999
YFL055W	7.29	7.74	6.29	7.19	5.99	6.53	6.39	6.65	6.75	6.45	6.59	6.72	6.01	5.87	6.36	6.55													YDR501W	>0.9999	YOR290C	0.4703	YHR090C	>0.9999	YML092C	>0.9999
YFL056C	4.73	4.76	4.01	4.67	4.66	4.7	4.72	4.58	4.41	4.13	4.23	4.34	4.58	4.55	4.63	4.55													YDR151C	>0.9999	YCR047C	>0.9999	YLR110C	>0.9999	YLR388W	>0.9999
YFL059W	5.82	6.35	6.07	6.04	5.96	6.11	6.03	6.13	6.7	6.41	6.59	6.7	5.7	6.23	6.44	6.05													YNL216W	>0.9999	YDR085C	>0.9999	YPR164W	>0.9999	YHR159W	>0.9999
YFL060C	5.76	6.23	5.63	5.83	6.24	6.16	6.11	5.95	6.61	6.15	6.23	5.97	5.91	6.09	6.39	6.33													YBR258C	>0.9999	YNL176C	>0.9999	YKR023W	>0.9999	YCR005C	>0.9999
YFL061W	5.16	4.63	6.59	4.81	5.49	5.24	5.22	5.33	5.85	4.66	4.62	4.72	4.45	4.54	5.8	6.11													YBR256C	>0.9999	YHR021W-A	>0.9999	YDR523C	>0.9999	YLR003C	>0.9999
YFL062W	8.41	8.8	9.33	9.31	9.56	9.26	9.97	9.72	9.86	8.59	9.44	9.32	9.35	9.59	10.02	9.89													YGR136W	>0.9999	YEL034W	>0.9999	YJL193W	>0.9999	YBL039C	>0.9999
YFL064C	7.17	7.29	6.25	6.84	7.61	7.46	6.93	6.74	7.46	6.63	6.43	6.31	6.83	6.94	7.09	7.03													YDL205C	>0.9999	YGL231C	>0.9999	YPR191W	>0.9999	YMR146C	>0.9999
YFL065C	6.83	6.96	5.99	6.68	7.21	7.27	6.78	6.52	6.93	6.65	6.41	6.25	6.67	6.67	6.71	6.62													YDL229W	>0.9999	YEL017C-A	>0.9999	YPR133W-A	>0.9999	YOR103C	>0.9999
YFL067W	5.47	4.76	5.11	4.11	6.84	5.4	4.47	4.61	5.17	4.93	3.71	3.95	4.81	4.69	4.28	4.39													YMR178W	>0.9999	YOL143C	>0.9999	YLR307C-A	>0.9999	YMR197C	>0.9999
YFL068W	6.46	6.57	5.97	5.72	6.54	6.68	5.96	5.8	6.69	6	5.23	5.66	6.26	5.91	5.81	5.9													YJR052W	0.9312	YBR132C	0.1223	YDR231C	>0.9999	YDL053C	>0.9999
YFR001W	9.76	9.36	9.33	9.14	8.79	9.15	8.64	8.57	9.36	9.87	9.21	9.02	9.19	9.09	8.45	8.53													YGR020C	>0.9999	YIL003W	>0.9999	YNR027W	0.4543	YBR173C	>0.9999
YFR002W	8.41	8.33	8.67	8.5	8	8.23	8.34	8.4	7.84	8.34	8.49	8.49	8.21	8.02	8.23	8.35													YGL256W	>0.9999	YMR140W	>0.9999	YML092C	>0.9999	YBR097W	>0.9999
YFR003C	7.54	7.62	6.97	7.54	7.64	7.68	7.62	7.67	7.78	7.68	7.91	7.82	7.64	7.91	7.73	7.72													YGL157W	>0.9999	YHR038W	>0.9999	YLR388W	>0.9999	YHR005C-A	>0.9999
YFR004W	8.77	8.51	8.62	8.7	8.54	8.63	8.44	8.42	8.68	8.53	8.96	9.01	8.46	8.55	8.34	8.37													YGR169C	>0.9999	YDL229W	>0.9999	YHR159W	>0.9999	YLR427W	>0.9999
YFR005C	6.67	7.33	7.15	7.12	6.84	6.8	7.15	7.11	7.21	6.75	7.23	7.35	7.11	7.1	7.14	7.02													YDR188W	>0.9999	YHR090C	>0.9999	YCR005C	>0.9999	YEL018W	>0.9999
YFR006W	8.89	8.89	8.81	9.1	9.01	9.24	9.09	9.05	9.58	8.93	8.83	8.87	8.6	8.59	8.97	8.88													YCL042W	>0.9999	YLR110C	>0.9999	YLR003C	>0.9999	YKL017C	>0.9999
YFR007W	6.22	6.98	6.48	6.71	6.84	6.77	6.89	6.78	6.8	6.49	6.91	6.81	6.45	6.74	6.96	6.83													YOL152W	>0.9999	YPR164W	>0.9999	YBL039C	>0.9999	YLR432W	>0.9999
YFR008W	4.98	5.4	5.26	5.65	5.04	5.12	5.75	5.6	5.34	5.22	5.74	5.73	4.82	5.26	5.76	5.56													YJR078W	>0.9999	YKR023W	>0.9999	YMR146C	>0.9999	YDR110W	>0.9999
YFR009W	9.61	9.7	9.84	9.69	9.48	9.69	9.65	9.62	9.45	9.64	9.58	9.5	9.55	9.54	9.58	9.67													YLR446W	>0.9999	YDR523C	>0.9999	YOR103C	>0.9999	YGR061C	>0.9999
YFR010W	9.25	9.19	9.05	9.19	9.28	9.25	9.08	9.14	9.15	9.38	9.34	9.12	9.23	9.42	9.12	9.09													YML068W	>0.9999	YJL193W	>0.9999	YMR197C	>0.9999	YGR056W	>0.9999
YFR011C	8.26	8.2	8.33	8.53	7.98	8.28	8.25	8.24	8	8.05	9.08	8.97	7.88	8.11	8.17	8.12													YCR010C	>0.9999	YPR191W	>0.9999	YDL053C	>0.9999	YOR320C	>0.9999
YFR012W	3.9	3.87	3.74	3.28	4.57	3.52	3.55	3.48	3.68	4.38	3.87	3.95	4.03	4.04	3.68	3.66													YBR068C	>0.9999	YPR133W-A	>0.9999	YBR173C	>0.9999	YAL040C	>0.9999
YFR012W-A	4.27	4.37	4.79	4.07	5.05	5.43	4.88	4.22	6.15	4.4	4.07	4.08	3.95	3.96	4.76	4.65													YML018C	>0.9999	YLR307C-A	0.1102	YBR097W	>0.9999	YKL190W	>0.9999
YFR013W	7.58	7.31	7.12	7.32	7.48	7.52	7.03	6.94	7.35	7.45	6.94	6.89	7.27	7.26	6.93	6.89													YMR202W	>0.9999	YDR231C	>0.9999	YHR005C-A	>0.9999	YGL236C	>0.9999
YFR014C	6.92	6.98	6.77	7.07	7.36	7.47	7.17	7.05	7.72	6.67	7.08	7.05	6.79	7.11	7.05	7.14													YPL019C	>0.9999	YNR027W	>0.9999	YLR427W	>0.9999	YBR135W	>0.9999
YFR015C	5.94	7.27	5.61	6.67	8.21	7.49	6.89	6.73	6.72	5.93	6.5	6.25	7.88	8.59	6.71	7.18													YOR149C	>0.9999	YML092C	>0.9999	YEL018W	>0.9999	YDL128W	>0.9999
YFR016C	8.41	8.38	7.99	8.11	8.62	8.36	7.98	8.06	8.42	8.38	7.67	7.48	8.34	8.15	8.09	8.09													YJR080C	>0.9999	YLR388W	>0.9999	YKL017C	>0.9999	YJR153W	>0.9999
YFR017C	5.39	6.51	5.27	6.15	7	6.72	6.57	6.07	7.49	5.54	5.46	5.41	6.25	7.22	6.62	6.49													YER117W	>0.9999	YHR159W	>0.9999	YLR432W	>0.9999	YMR105C	>0.9999
YFR018C	7.43	7.69	7.47	7.51	7.45	7.6	7.53	7.35	8.49	7.53	7.39	7.34	7.42	7.58	7.67	7.57													YGR122W	>0.9999	YCR005C	>0.9999	YDR110W	>0.9999	YPR108W-A	>0.9999
YFR019W	8.42	8.83	8.01	7.86	8.77	8.37	7.96	7.92	9.01	8.57	7.91	7.78	8.89	8.61	8.05	8.09													YPR198W	>0.9999	YLR003C	>0.9999	YGR061C	>0.9999	YOL013C	>0.9999
YFR021W	6.78	6.96	6.82	6.83	6.88	6.84	6.87	6.94	6.96	6.98	6.42	6.42	6.99	6.97	7.03	6.91													YNL304W	>0.9999	YBL039C	>0.9999	YGR056W	>0.9999	YLR109W	>0.9999
YFR022W	4.78	5.72	4.96	5.14	5.49	5.12	5.36	5.2	5.31	5.07	4.82	4.9	5.48	5.58	5.4	5.3													YBR286W	>0.9999	YMR146C	>0.9999	YOR320C	>0.9999	YLL028W	>0.9999
YFR023W	3.82	4.26	3.54	3.94	4.7	3.98	4.01	3.84	3.89	4.32	3.77	3.74	3.67	3.72	4.23	4.31													YBR063C	>0.9999	YOR103C	>0.9999	YAL040C	>0.9999	YGR046W	>0.9999
YFR024C-A	8.3	8.45	8.57	8.61	8.43	8.56	8.68	8.63	8.66	8.11	8.69	8.68	8.22	8.38	8.72	8.69													YMR155W	>0.9999	YMR197C	>0.9999	YKL190W	>0.9999	YNL326C	>0.9999
YFR025C	9.13	9.14	9.18	9.19	9.26	9.12	9.49	9.33	9.35	9.11	9.1	9.06	9.48	9.3	9.19	9.3													YBR221C	>0.9999	YDL053C	>0.9999	YGL236C	>0.9999	YGR230W	>0.9999
YFR026C	5.53	5.89	5.32	5.45	5.93	5.71	5.64	5.7	5.4	5.95	5.57	5.61	5.84	5.8	5.79	5.75													YGR037C	>0.9999	YDR034C-A	0.099	YBR135W	>0.9999	YIL135C	>0.9999
YFR027W	5.7	5.31	5.4	5.6	5.76	5.7	5.42	5.56	5.5	5.83	5.62	5.64	5.46	5.4	5.74	5.55													YDR285W	>0.9999	YBR173C	>0.9999	YDL128W	>0.9999	YOR180C	>0.9999
YFR028C	8.41	8.24	8.25	8.22	8.17	8.15	8.03	8.13	7.99	8.31	8.14	8.15	8.48	8.38	8.02	8.01													YDR127W	0.4961	YBR097W	>0.9999	YJR153W	>0.9999	YER065C	>0.9999
YFR029W	7.39	7.59	7.31	7.21	7.58	7.27	7.37	7.38	7.68	7.61	6.91	6.61	7.83	7.7	7.44	7.38													YDL066W	>0.9999	YHR005C-A	>0.9999	YMR105C	>0.9999	YDR388W	>0.9999
YFR030W	11.43	11.78	11.03	11.29	11.36	11.2	11.28	11.32	11.09	11.45	11.02	11.04	11.4	11.42	11.29	11.19													YIR021W	>0.9999	YLR427W	>0.9999	YPR108W-A	>0.9999	YFR002W	>0.9999
YFR031C	8.38	7.96	8.25	8.01	8.49	8.12	7.98	8.07	8.48	8.38	7.86	7.93	8.7	8.33	8.01	8.09													YPR017C	>0.9999	YEL018W	>0.9999	YOL013C	>0.9999	YPL219W	>0.9999
YFR031C-A	12.82	12.9	12.98	12.96	12.9	12.9	12.95	12.93	12.79	12.86	13	13.01	12.9	12.97	12.99	12.96													YKL186C	>0.9999	YKL017C	>0.9999	YLR109W	>0.9999	YGL067W	>0.9999
YFR031C-A	11.95	11.93	12.07	12.05	12.1	12.14	12.09	12.09	11.97	11.98	12.07	12.04	11.97	12.16	12.08	12.06													YMR156C	>0.9999	YLR432W	>0.9999	YLL028W	>0.9999	YBR061C	>0.9999
YFR032C	3.92	3.75	4.99	4.71	4.68	4.48	4.87	5.05	3.92	3.75	3.94	3.86	3.31	3.26	4.94	4.84													YDR420W	>0.9999	YDR110W	>0.9999	YGR046W	>0.9999	YDL127W	>0.9999
YFR032C-A	12.12	12.16	11.97	12.14	12.13	12.12	12.14	12.2	12.11	12.28	12.29	12.25	12.2	12.14	12.22	12.15													YLR210W	>0.9999	YGR061C	0.9943	YNL326C	>0.9999	YGL139W	>0.9999
YFR032C-B	2.99	4.3	2.69	3.54	3.6	3.29	2.67	2.76	3.21	3.65	3.76	3.2	3.88	4.34	2.25	2.72													YCR038C	>0.9999	YGR056W	0.9874	YGR230W	>0.9999	YGR208W	>0.9999
YFR033C	10.66	10.97	10.13	10.42	10.87	10.6	10.26	10.3	10.81	11.18	10.26	10.29	10.8	10.97	10.5	10.39													YFR012W	>0.9999	YOR320C	>0.9999	YIL135C	>0.9999	YNL129W	>0.9999
YFR034C	8.83	8.82	8.59	8.48	8.95	8.79	8.4	8.44	8.49	8.85	8.45	8.64	9.16	9.18	8.43	8.39													YPL184C	>0.9999	YKL190W	>0.9999	YOR180C	>0.9999	YPR074C	>0.9999
YFR035C	4.39	4.69	5.08	4.56	4.8	4.57	5.07	4.97	4.46	4.02	4.76	5	4.49	4.46	4.89	5.13													YJR077C	>0.9999	YBR135W	>0.9999	YER065C	>0.9999	YIL166C	>0.9999
YFR036W	7.08	6.86	7.27	7.04	6.69	6.89	6.9	6.83	7.18	7.03	6.88	6.72	6.45	6.59	6.89	6.69													YNL083W	>0.9999	YDL128W	>0.9999	YDR388W	>0.9999	YER017C	>0.9999
YFR037C	10.27	10.15	9.72	9.67	10.26	10.31	9.47	9.46	10.37	10.15	9.59	9.64	10.27	10.12	9.39	9.38													YJL217W	>0.9999	YJR153W	>0.9999	YFR002W	>0.9999	YNL047C	>0.9999
YFR038W	8.09	8.17	7.85	7.88	7.78	7.84	7.79	7.78	7.99	8.27	7.69	7.72	8.1	8.06	7.75	7.77													YHL038C	>0.9999	YMR105C	>0.9999	YPL219W	>0.9999	YCR020C	>0.9999
YFR039C	7.2	7.45	7.52	7.64	7.25	7.39	7.72	7.71	7.49	7.14	7.71	7.72	7.54	7.5	7.7	7.85													YKL145W	>0.9999	YPR108W-A	0.3454	YGL067W	>0.9999	YDR306C	>0.9999
YFR040W	7.86	7.84	7.93	7.7	7.61	7.38	7.6	7.71	7.4	7.97	7.85	7.74	8.1	7.81	7.51	7.57													YKL092C	>0.9999	YOL013C	>0.9999	YBR061C	>0.9999	YPL268W	>0.9999
YFR041C	7.7	7.59	7.55	7.68	8.09	8.06	7.75	7.75	7.87	7.85	8.02	8.07	8.07	8.2	7.73	7.75													YGL258W	>0.9999	YLR109W	>0.9999	YDL127W	>0.9999	YDR208W	>0.9999
YFR042W	6.64	6.87	6.9	7.24	7.09	7.21	7.59	7.44	6.97	6.66	7.51	7.52	6.71	6.85	7.49	7.5													YOR229W	>0.9999	YLL028W	0.0639	YGL139W	>0.9999	YJL166W	>0.9999
YFR043C	7.24	7.29	7.02	7.12	6.94	7.15	7.21	7.07	7.53	6.93	7.25	7.44	7.23	6.99	7.2	7.02													YLR116W	>0.9999	YGR046W	>0.9999	YGR208W	>0.9999	YBR009C	>0.9999
YFR044C	11.02	11.39	11.01	11.13	10.97	10.87	11.08	11.19	11.23	11.2	10.84	10.86	11	11.03	11.17	11.06													YNL003C	>0.9999	YNL326C	>0.9999	YNL129W	>0.9999	YIR027C	0.1006
YFR045W	6.58	6.77	6.35	6.76	6.88	6.99	7	6.8	7.1	6.45	6.39	6.53	6.64	6.66	6.91	6.95													YML017W	>0.9999	YGR230W	>0.9999	YPR074C	>0.9999	YNR041C	>0.9999
YFR046C	6.35	6.37	6.26	6.36	6.36	6.25	6.43	6.4	6.44	6.39	6.44	6.54	6.22	6.46	6.54	6.6													YDR283C	>0.9999	YIL135C	>0.9999	YIL166C	>0.9999	YHR103W	>0.9999
YFR047C	9.08	9.63	9.75	9.7	9.99	9.98	10.25	10.07	10.08	9.18	9.82	9.8	9.52	9.59	10.22	10.19													YBL093C	>0.9999	YOR180C	>0.9999	YER017C	>0.9999	YGR159C	>0.9999
YFR048W	8.22	8.4	8.2	8.1	8.43	8.05	8.22	8.23	8.04	8.26	8.07	7.85	8.68	8.49	8.18	8.08													YOL122C	>0.9999	YER065C	>0.9999	YNL047C	>0.9999	YML102W	>0.9999
YFR049W	9.57	10.05	9.18	9.57	9.7	9.57	9.48	9.51	9.87	9.77	9.79	9.82	9.73	9.89	9.56	9.49													YJL127C-B	>0.9999	YDR388W	>0.9999	YCR020C	>0.9999	YBL090W	>0.9999
YFR050C	9.59	9.61	9.62	9.75	9.47	9.48	9.61	9.58	9.68	9.63	9.77	9.62	9.52	9.58	9.63	9.61													YDR512C	>0.9999	YFR002W	>0.9999	YDR306C	>0.9999	YER016W	>0.9999
YFR051C	9.63	9.56	9.63	9.62	9.65	9.58	9.59	9.61	9.37	9.63	9.4	9.3	9.72	9.65	9.65	9.62													YBL101C	>0.9999	YPL219W	>0.9999	YPL268W	>0.9999	YLR466C-B	>0.9999
YFR052W	9.4	9.96	9.41	9.49	9.21	9.45	9.5	9.55	9.61	9.38	9.73	9.67	9.26	9.22	9.57	9.6													YDR483W	>0.9999	YGL067W	>0.9999	YDR208W	>0.9999	YNR051C	>0.9999
YFR053C	9.32	10.17	9.03	9.44	10.6	10.16	9.75	9.56	10.39	9.13	9.45	9.13	9.83	10.69	9.44	9.68													YCR094W	>0.9999	YBR061C	>0.9999	YJL166W	>0.9999	YGR280C	>0.9999
YFR055W	6.68	5.82	7.42	7.02	6.84	6.68	8.01	7.8	8.86	6.57	7.11	7.07	6.83	7.04	8.28	8.07													YKL037W	>0.9999	YDL127W	>0.9999	YBR009C	>0.9999	YMR185W	>0.9999
YFR057W	2.04	1.92	2.19	2.27	2.97	1.99	1.46	1.92	2.63	2.14	1.1	1.88	2.24	2.51	1.95	1.64													YOL001W	>0.9999	YGL139W	0.9914	YIR027C	0.9972	YDR501W	>0.9999
YGL001C	8.9	9.45	8.9	8.89	8.99	9.17	9.21	9.12	9.44	8.96	9.28	9.25	8.95	9.09	9.28	9.33													YHR199C	>0.9999	YGR208W	>0.9999	YNR041C	>0.9999	YDR151C	>0.9999
YGL002W	6.54	6.67	6.8	7.23	6.83	6.88	7.37	7.38	6.95	6.52	7.1	7.14	6.85	6.9	7.51	7.32													YOR080W	>0.9999	YNL129W	>0.9999	YHR103W	0.4543	YNL216W	>0.9999
YGL003C	6.7	7	6.77	6.74	6.93	6.84	6.98	7.01	6.99	6.81	6.81	6.7	7.28	7.08	7.09	7.03													YDR419W	>0.9999	YPR074C	>0.9999	YGR159C	>0.9999	YBR258C	>0.9999
YGL004C	6.8	6.93	6.75	6.76	6.85	6.97	6.97	6.94	7.41	6.73	6.65	6.71	6.67	6.86	6.98	6.93													YKL063C	>0.9999	YIL166C	>0.9999	YML102W	>0.9999	YGR136W	>0.9999
YGL005C	7.04	6.82	6.92	7.01	6.91	6.97	6.93	6.98	7.18	6.99	7.46	7.64	7.45	7.24	7.12	7.15													YNL234W	>0.9999	YER017C	>0.9999	YBL090W	>0.9999	YDL205C	>0.9999
YGL006W	7.93	8.47	7.8	8.17	8.13	8.04	8.06	8.11	8.57	8.1	8.09	8.04	8.08	8.22	8.24	8.11													YDL176W	0.9996	YNL047C	0.3747	YER016W	>0.9999	YDL229W	>0.9999
YGL006W-A	3.47	3.14	3.2	4.55	4.21	3.84	3.67	3.59	4.05	2.78	2.82	2.77	3.39	3.63	3.39	4.17													YDL017W	>0.9999	YCR020C	>0.9999	YLR466C-B	0.9138	YMR178W	>0.9999
YGL007C-A	6.79	5.14	8.61	7.18	9.12	10.12	8.72	6.66	10.65	5.33	4.83	5.03	4.94	5	8.27	7.78													YAR027W	>0.9999	YDR306C	>0.9999	YNR051C	>0.9999	YJR052W	>0.9999
YGL008C	12.38	12.24	12.24	12.27	12.27	12.26	12.27	12.21	12.25	12.19	11.84	11.71	11.93	11.98	12.27	12.22													YAL041W	>0.9999	YPL268W	>0.9999	YGR280C	>0.9999	YGR020C	>0.9999
YGL009C	10.61	10.11	10.93	10.93	9.72	10.13	11.04	10.76	9.22	10.07	10.11	9.93	9.51	9.58	10.21	10.21													YJL157C	>0.9999	YDR208W	>0.9999	YMR185W	0.3955	YGL256W	>0.9999
YGL010W	5.9	5.87	5.8	6.48	6.39	6.41	6.61	6.59	6.52	6.01	6.54	6.52	6.23	6.62	6.76	6.85													YDR440W	>0.9999	YJL166W	0.7146	YDR501W	>0.9999	YNL195C	>0.9999
YGL011C	10.02	10.37	9.94	10.07	9.87	9.89	9.97	10.03	10.19	10.1	10.35	10.35	9.89	9.96	10.07	10.05													YNR040W	>0.9999	YBR009C	>0.9999	YDR151C	>0.9999	YGL157W	>0.9999
YGL012W	11.16	11.68	11.18	11.34	10.99	11.01	11.06	11.08	11.31	11.44	11.19	11.2	10.99	10.95	11.13	11.12													YBL019W	>0.9999	YIR027C	>0.9999	YNL216W	>0.9999	YGR169C	>0.9999
YGL013C	8.62	8.34	8.34	8.27	8.15	8.03	8	8.09	8.71	8.52	7.9	7.78	8.35	8.12	8.06	8.06													YPL156C	>0.9999	YNR041C	>0.9999	YBR258C	>0.9999	YDR188W	>0.9999
YGL014W	9.44	9.61	9.26	8.94	9.11	8.96	8.69	8.69	8.95	9.62	8.59	8.55	9.4	9.09	8.64	8.64													YLR321C	>0.9999	YHR103W	>0.9999	YBR256C	>0.9999	YCL042W	>0.9999
YGL015C	3.16	3.14	3.03	2.73	3.91	2.41	2.71	2.45	2.42	3.19	2.84	2.96	2.84	2.92	2.87	2.49													YGR253C	>0.9999	YGR159C	>0.9999	YGR136W	>0.9999	YOL152W	>0.9999
YGL016W	7.24	7.26	7.84	7.63	7.32	7.35	7.61	7.73	7.14	7.21	7.4	7.18	7.35	7.47	7.54	7.57													YGR243W	>0.9999	YML102W	>0.9999	YDL205C	>0.9999	YLR446W	>0.9999
YGL017W	6.48	6.67	6.83	6.58	6.29	6.49	6.68	6.72	6.5	6.62	6.76	6.62	6.66	6.52	6.63	6.67													YNL309W	>0.9999	YER016W	>0.9999	YDL229W	>0.9999	YML068W	>0.9999
YGL018C	7.15	7.48	6.73	6.72	7.15	7.36	6.77	6.61	7.19	7.21	6.66	6.5	6.92	6.91	6.74	6.73													YFL065C	>0.9999	YNR051C	0.9986	YMR178W	>0.9999	YCR010C	>0.9999
YGL019W	8.71	8.76	8.56	8.73	8.73	8.73	8.58	8.55	9.11	8.72	8.64	8.71	8.8	8.76	8.48	8.31													YDR140W	>0.9999	YGR280C	0.7146	YJR052W	>0.9999	YML018C	>0.9999
YGL020C	8.5	8.38	8.5	8.45	8.56	8.66	8.38	8.41	8.73	8.31	8.31	8.43	8.58	8.63	8.35	8.34													YDL243C	>0.9999	YMR185W	>0.9999	YGR020C	>0.9999	YMR202W	>0.9999
YGL021W	8.32	8.4	7.76	8.17	8.45	8.34	8.03	8.03	8.07	8.16	8.41	8.49	8.74	8.84	8.09	8.07													YDL230W	>0.9999	YDR501W	>0.9999	YGL157W	0.5167	YOR149C	>0.9999
YGL022W	9.92	10.75	9.92	9.97	10.01	9.98	9.79	9.82	9.87	10.09	9.7	9.55	10.32	10.13	9.78	9.81													YBR302C	>0.9999	YDR151C	0.9079	YGR169C	>0.9999	YJR080C	>0.9999
YGL023C	8.4	8.45	8.19	8.14	8.44	8.11	7.96	7.99	8.57	8.39	7.84	7.85	8.32	8.44	8.06	7.97													YBR045C	>0.9999	YNL216W	>0.9999	YDR188W	>0.9999	YER117W	>0.9999
YGL025C	7.06	6.81	6.8	6.78	7.04	6.91	6.88	6.79	6.73	7.06	6.62	6.44	7.1	7.08	6.79	6.69													YGL032C	>0.9999	YBR258C	>0.9999	YOL152W	>0.9999	YGR122W	>0.9999
YGL026C	11.02	11.53	11.23	11.31	11.32	11.32	11.59	11.39	11.02	11.08	10.87	10.7	11.45	11.49	11.41	11.26													YOL051W	>0.9999	YBR256C	>0.9999	YLR446W	>0.9999	YPR198W	>0.9999
YGL027C	8.31	8.68	8.52	8.44	8.33	8.23	8.56	8.63	8.9	8.43	8.5	8.44	8.53	8.5	8.75	8.7													YJR034W	>0.9999	YGR136W	>0.9999	YML068W	0.9989	YNL304W	>0.9999
YGL028C	9.89	10.03	10.32	10.08	10.36	9.75	9.95	9.98	9.47	10.07	9.73	9.54	10.23	10.15	9.78	9.79													YLR342W-A	>0.9999	YDL205C	>0.9999	YCR010C	>0.9999	YBR286W	>0.9999
YGL029W	10.39	10.37	9.75	9.43	9.87	9.95	8.86	8.73	10.11	10.66	9.26	9.29	9.95	9.58	8.55	8.48													YKL006C-A	>0.9999	YDL229W	>0.9999	YML018C	>0.9999	YBR063C	>0.9999
YGL030W	12.7	12.72	12.72	12.76	12.74	12.78	12.78	12.76	12.71	12.69	12.69	12.67	12.62	12.65	12.77	12.76													YLR450W	>0.9999	YMR178W	0.8097	YMR202W	>0.9999	YMR155W	>0.9999
YGL031C	12.28	12.26	12.41	12.44	12.28	12.28	12.42	12.41	12.21	12.34	12.48	12.46	12.26	12.28	12.4	12.39													YML013W	>0.9999	YJR052W	>0.9999	YPL019C	>0.9999	YBR221C	>0.9999
YGL032C	4.77	6.3	4.64	4.4	5.99	5.62	5.04	4.42	5.5	5.14	4.3	4.43	4.95	5.19	4.64	4.57													YJL038C	>0.9999	YGR020C	>0.9999	YOR149C	>0.9999	YGR037C	>0.9999
YGL033W	3.68	4.44	2.84	2.56	4.56	3.6	2.82	2.82	4.01	4.21	3.32	3.77	4.23	4.28	2.67	3													YLR154C-H	>0.9999	YGL256W	>0.9999	YJR080C	>0.9999	YDR285W	>0.9999
YGL035C	8.69	8.81	8.31	8.33	8.69	8.43	7.91	8.06	8.65	8.63	7.94	7.96	8.91	8.8	8.1	8.31													YAL016C-B	>0.9999	YGL157W	>0.9999	YER117W	>0.9999	YDR127W	>0.9999
YGL036W	7.02	7.23	7.15	7.16	7.23	7	7.52	7.49	7.61	7.16	6.87	6.8	7.51	7.56	7.54	7.56													YGL159W	>0.9999	YGR169C	>0.9999	YGR122W	>0.9999	YDL066W	>0.9999
YGL037C	9.69	10.46	9.25	10.03	10.37	10.38	10.25	10.08	10.39	9.77	10.14	10.02	9.85	10.44	10.17	10.15													YDR165W	>0.9999	YDR188W	>0.9999	YPR198W	>0.9999	YIR021W	>0.9999
YGL038C	8.38	8.43	7.25	8.14	8.75	8.82	8.45	8.37	8.92	8.5	7.93	7.77	8.84	9.02	8.42	8.34													YER174C	>0.9999	YCL042W	>0.9999	YNL304W	>0.9999	YPR017C	>0.9999
YGL039W	8.41	8.58	8.32	8.33	7.59	7.87	8.11	8.18	9.29	8.22	8.4	8.51	7.67	7.82	8.26	8.21													YDR218C	>0.9999	YOL152W	>0.9999	YBR286W	>0.9999	YKL186C	>0.9999
YGL040C	8.94	9.49	9.11	9.29	9.51	9.6	9.37	9.06	9.4	8.92	9.19	9.37	9.14	9.34	9.29	9.15													YLR423C	>0.9999	YJR078W	>0.9999	YBR063C	>0.9999	YMR156C	>0.9999
YGL041C-B	3.76	3.81	3.83	3.5	4.42	3.22	3.43	3.62	3.01	3.66	3.94	4.02	4.25	4.29	3.39	3.42													YNL185C	>0.9999	YLR446W	>0.9999	YMR155W	>0.9999	YDR420W	>0.9999
YGL043W	8.35	8.19	8.22	8.25	8.16	8.33	8.13	8.03	8.31	8.16	8.39	8.5	8.03	8.02	8.01	8.04													YKL161C	>0.9999	YML068W	>0.9999	YBR221C	>0.9999	YLR210W	>0.9999
YGL044C	7.9	7.77	7.68	7.67	7.63	7.8	7.43	7.46	7.65	7.87	7.53	7.69	7.76	7.7	7.35	7.31													YGL129C	>0.9999	YCR010C	>0.9999	YGR037C	>0.9999	YCR038C	>0.9999
YGL045W	6.82	6.86	7.72	7.35	7.16	6.86	7.69	7.54	7.3	6.71	7.43	7.59	7.1	6.89	7.78	7.79													YDL055C	>0.9999	YML018C	>0.9999	YDR285W	0.3412	YFR012W	>0.9999
YGL047W	6.45	6.88	6.35	6.8	6.65	6.82	6.96	6.84	7.04	6.63	7.27	7.25	6.49	7.1	7.03	6.93													YLR452C	>0.9999	YMR202W	>0.9999	YDR127W	>0.9999	YPL184C	>0.9999
YGL048C	10.01	10.27	9.85	10.13	9.98	10.09	10.09	9.99	10.09	10.03	10.24	10.24	9.84	9.97	10.01	10.07													YFR050C	>0.9999	YPL019C	>0.9999	YDL066W	>0.9999	YJR077C	>0.9999
YGL049C	7.83	7.81	7.81	7.67	7.71	7.48	7.65	7.77	7.23	7.82	7.74	7.68	7.86	7.74	7.6	7.66													YDL007W	>0.9999	YOR149C	0.9992	YIR021W	>0.9999	YNL083W	>0.9999
YGL050W	6.85	7.16	7.24	7.13	6.7	6.83	7.19	7.21	6.63	6.97	7.51	7.45	6.78	6.73	7.1	7.19													YOL033W	>0.9999	YJR080C	>0.9999	YPR017C	>0.9999	YJL217W	>0.9999
YGL051W	4.52	4.5	4.15	4.18	4.9	3.87	4.13	4.13	3.33	4.6	4.89	4.81	4.48	4.83	3.85	4.14													YOR045W	>0.9999	YER117W	>0.9999	YKL186C	>0.9999	YHL038C	>0.9999
YGL053W	5.96	5.87	5.8	6.34	5.97	6.1	6.54	6.37	6.23	5.68	6.11	6.16	5.54	5.74	6.65	6.63													YLR015W	>0.9999	YGR122W	>0.9999	YMR156C	>0.9999	YKL145W	>0.9999
YGL054C	9.86	9.71	10.08	10.19	10.05	10.3	10.26	10.15	9.77	9.81	10.37	10.3	9.77	9.89	9.99	10.1													YOL076W	>0.9999	YPR198W	0.8377	YDR420W	>0.9999	YKL092C	>0.9999
YGL055W	10.49	9.92	10.23	10.29	9.42	9.62	9.99	9.92	10.54	10.52	10.22	10.22	9.53	9.6	10.2	10.1													YMR134W	>0.9999	YNL304W	0.9999	YLR210W	>0.9999	YGL258W	>0.9999
YGL056C	9.37	9.1	9.05	8.78	8.73	8.9	8.39	8.29	9	9.18	8.51	8.56	8.59	8.48	8.16	8.16													YAL064W	>0.9999	YBR286W	>0.9999	YCR038C	>0.9999	YOR229W	>0.9999
YGL057C	6.8	6.96	7.11	6.96	7.13	6.89	7.18	7.06	7.13	7.08	7.26	7.24	6.88	6.85	7.15	7.13													YBR085W	>0.9999	YBR063C	>0.9999	YFR012W	>0.9999	YLR116W	>0.9999
YGL058W	8.02	7.94	8.13	8.07	7.75	7.85	7.95	8.02	7.67	7.99	8.5	8.49	7.62	7.68	7.99	8.06													YCL063W	>0.9999	YMR155W	>0.9999	YPL184C	>0.9999	YNL003C	>0.9999
YGL059W	6.79	7.02	7.01	7.52	7.55	7.63	8.04	7.35	7.85	6.6	6.84	6.82	6.95	7.29	7.37	6.99													YBR080C	>0.9999	YBR221C	>0.9999	YJR077C	>0.9999	YML017W	>0.9999
YGL060W	7.28	7.24	7.29	7.28	6.77	7.11	7.22	7.14	6.95	7.08	7.22	7.05	6.83	6.79	7.11	7.16													YKL018C-A	>0.9999	YGR037C	>0.9999	YNL083W	>0.9999	YDR283C	>0.9999
YGL061C	7.22	6.66	7.04	6.91	7.08	7.25	6.85	6.98	7.07	7.21	7.13	7.15	7.25	7.18	7	7.07													YIL111W	>0.9999	YDR285W	>0.9999	YJL217W	>0.9999	YBL093C	>0.9999
YGL062W	11.14	11.66	10.88	11.43	9.79	9.75	10.05	10.29	12.18	11.1	10.84	11.17	9.79	9.73	10.46	10.49													YDR434W	>0.9999	YDL066W	>0.9999	YHL038C	>0.9999	YOL122C	>0.9999
YGL063W	5.31	5.67	5.69	5.59	5.74	5.47	5.76	5.7	5.41	5.46	5.47	5.41	5.88	5.87	5.88	5.68													YDR489W	>0.9999	YIR021W	>0.9999	YKL145W	>0.9999	YJL127C-B	>0.9999
YGL064C	6.49	6.32	6.59	6.28	6.17	6.33	6.25	6.29	6.06	6.59	6.23	6.21	6.31	6.25	6.22	6.2													YCR051W	>0.9999	YPR017C	>0.9999	YKL092C	>0.9999	YDR512C	>0.9999
YGL065C	7.95	7.93	7.67	8.19	8	8.2	8.17	8.08	8.07	8.19	8.04	8.12	7.65	8.17	8.28	8													YNL291C	0.9617	YKL186C	>0.9999	YOR229W	>0.9999	YBL101C	>0.9999
YGL066W	7.7	7.63	7.66	7.5	7.91	7.6	7.77	7.72	7.41	7.45	7.02	6.94	7.55	7.37	7.67	7.62													YPL267W	>0.9999	YMR156C	>0.9999	YLR116W	>0.9999	YDR483W	>0.9999
YGL067W	8.43	8.53	8.63	8.62	8.5	8.49	8.72	8.65	8.87	8.22	8.41	8.52	8.15	8.25	8.65	8.67													YPR156C	>0.9999	YDR420W	0.7146	YNL003C	>0.9999	YCR094W	>0.9999
YGL068W	7.91	8.11	8.48	8.51	8.38	8.64	8.59	8.49	8.07	8.1	8.98	8.89	8.23	8.42	8.47	8.49													YHR096C	>0.9999	YLR210W	>0.9999	YML017W	>0.9999	YKL037W	>0.9999
YGL070C	8.01	8.28	8.17	8.14	7.7	8.09	8.07	8.01	7.57	8.18	8.71	8.58	7.9	8.11	7.99	8													YJL020C	>0.9999	YCR038C	>0.9999	YDR283C	>0.9999	YOL001W	>0.9999
YGL071W	7.86	7.81	7.69	7.4	7.89	7.51	7.59	7.62	7.79	7.58	6.97	6.86	7.29	7.08	7.77	7.67													YHR070W	>0.9999	YFR012W	0.9996	YBL093C	>0.9999	YHR199C	>0.9999
YGL073W	8.15	8.06	7.81	7.85	8.67	8.25	7.94	7.81	8.48	8	7.22	7.13	8.09	7.92	7.98	7.87													YDR463W	>0.9999	YPL184C	>0.9999	YOL122C	>0.9999	YOR080W	>0.9999
YGL075C	5.42	5.1	5.13	5.31	5.36	5.37	5.25	5.21	4.93	5.34	5.31	5.2	5.41	5.35	5.33	5.34													YGL128C	>0.9999	YJR077C	>0.9999	YJL127C-B	>0.9999	YDR419W	>0.9999
YGL076C	12.75	12.71	12.9	12.85	12.67	12.67	12.86	12.88	12.62	12.81	12.87	12.87	12.65	12.71	12.85	12.84													YOL031C	>0.9999	YNL083W	>0.9999	YDR512C	>0.9999	YKL063C	>0.9999
YGL077C	11.32	11.03	11.1	11.09	11.01	10.79	10.63	10.94	10.83	10.98	10.84	10.77	11.1	10.91	10.78	10.87													YIL053W	>0.9999	YJL217W	>0.9999	YBL101C	>0.9999	YNL234W	>0.9999
YGL078C	10.03	9.55	10.02	9.46	9.12	9.4	9	9.03	9.05	10.12	9.44	9.47	9.37	9.28	8.78	8.82													YAL002W	>0.9999	YHL038C	>0.9999	YDR483W	>0.9999	YDL176W	>0.9999
YGL079W	7.54	7.61	7.28	7.6	7.35	7.61	7.55	7.33	7.6	7.63	7.67	7.73	7.3	7.46	7.5	7.47													YBR229C	0.9984	YKL145W	>0.9999	YCR094W	>0.9999	YDL017W	>0.9999
YGL080W	8.13	8	8.08	8.32	7.98	8.19	8.26	8.25	7.95	8.18	8.64	8.52	8.02	8.09	8.19	8.25													YML126C	>0.9999	YKL092C	>0.9999	YKL037W	>0.9999	YAR027W	>0.9999
YGL081W	4.2	4.55	3.91	3.97	4.53	3.86	3.83	4.26	3.66	3.96	4.09	4.18	4.02	4.3	4	4.18													YNR048W	>0.9999	YGL258W	>0.9999	YOL001W	>0.9999	YAL041W	>0.9999
YGL082W	8.54	8.45	8.19	8.6	8.85	8.91	8.51	8.49	8.64	8.34	8.69	8.79	8.49	8.81	8.58	8.69													YJL138C	>0.9999	YOR229W	>0.9999	YHR199C	>0.9999	YJL157C	>0.9999
YGL083W	7.68	7.92	7.3	7.23	7.12	7.13	7.03	7.13	7.06	7.51	6.88	6.87	7.64	7.33	6.88	6.85													YOR359W	>0.9999	YLR116W	0.982	YOR080W	>0.9999	YDR440W	>0.9999
YGL084C	7.51	7.67	7.75	7.91	7.59	7.73	7.89	7.86	7.57	7.49	7.72	7.67	7.58	7.64	7.84	7.91													YDR430C	>0.9999	YNL003C	>0.9999	YDR419W	>0.9999	YNR040W	>0.9999
YGL085W	6.69	6.5	6.57	6.63	6.58	6.8	6.46	6.51	6.72	6.79	6.83	6.88	6.83	6.72	6.58	6.56													YER077C	>0.9999	YML017W	0.8097	YKL063C	>0.9999	YBL019W	>0.9999
YGL086W	7.84	7.1	7.67	7.53	7.75	7.62	7.45	7.33	7.6	7.69	7.34	7.3	7.87	7.67	7.36	7.36													YAL046C	>0.9999	YDR283C	>0.9999	YNL234W	>0.9999	YPL156C	>0.9999
YGL087C	8.83	8.6	8.72	8.89	9.13	9.22	9.32	9.18	9.03	8.78	9.09	8.85	8.86	8.84	9.24	9.14													YHR080C	>0.9999	YBL093C	>0.9999	YDL176W	0.9994	YLR321C	>0.9999
YGL089C	4.25	4.49	4.87	4.39	4.31	4.16	4.69	4.7	3.75	4.5	4.71	4.58	4.26	4.39	4.41	4.35													YOR286W	>0.9999	YOL122C	>0.9999	YDL017W	>0.9999	YGR253C	>0.9999
YGL090W	5.7	5.74	4.86	5.05	5.41	5.06	4.87	4.7	5.11	5.76	5.11	5.48	5.9	5.89	4.51	4.59													YIR024C	>0.9999	YJL127C-B	>0.9999	YAR027W	>0.9999	YNL309W	>0.9999
YGL091C	6.58	6.72	6.82	6.7	6.49	6.63	6.8	6.82	6.64	6.62	7.14	7.26	6.75	6.89	6.83	6.98													YBR247C	>0.9999	YDR512C	>0.9999	YAL041W	>0.9999	YFL065C	>0.9999
YGL092W	9.34	9.97	9.37	9.19	9.22	9.23	9.01	8.9	9.25	9.43	9.07	9.02	9.67	9.45	8.81	8.8													YBR130C	>0.9999	YBL101C	0.099	YJL157C	>0.9999	YDR140W	>0.9999
YGL093W	7.73	7.7	7.23	7.63	7.8	7.7	7.73	7.59	7.69	7.64	7.46	7.45	7.56	7.64	7.71	7.65													YKL002W	>0.9999	YDR483W	>0.9999	YDR440W	>0.9999	YDL243C	>0.9999
YGL094C	8.83	8.47	8.65	8.64	9.09	8.82	8.64	8.72	8.62	8.72	8.37	8.17	8.92	8.68	8.68	8.58													YML022W	>0.9999	YCR094W	>0.9999	YNR040W	>0.9999	YDL230W	>0.9999
YGL095C	7.64	7.63	7.39	7.52	7.78	7.88	7.79	7.76	7.88	7.48	7.27	7.24	7.78	7.57	7.68	7.6													YNL175C	>0.9999	YKL037W	>0.9999	YBL019W	>0.9999	YBR302C	>0.9999
YGL096W	6.74	8.18	6.18	7.27	7.95	7.74	7.61	7.48	7.99	6.95	7.26	7.26	7.49	7.78	7.64	7.55													YAL036C	>0.9999	YOL001W	>0.9999	YPL156C	>0.9999	YBR045C	>0.9999
YGL097W	9.19	8.78	9.27	9.18	8.94	9.19	8.9	8.91	9.03	9.26	9.04	9.12	9.34	9.42	8.94	8.92													YCR086W	>0.9999	YHR199C	>0.9999	YLR321C	>0.9999	YGL032C	>0.9999
YGL098W	6.61	6.85	6.58	6.61	6.61	6.43	6.56	6.44	6.74	6.66	6.77	6.92	6.56	6.58	6.48	6.45													YNL307C	>0.9999	YOR080W	>0.9999	YGR253C	>0.9999	YOL051W	>0.9999
YGL099W	10.06	9.93	9.74	9.53	9.39	9.53	8.98	9.08	9.23	10.11	9.61	9.66	9.61	9.57	8.88	8.88													YDL247W	>0.9999	YDR419W	>0.9999	YGR243W	>0.9999	YJR034W	>0.9999
YGL100W	7.7	7.93	7.9	7.93	7.95	8.13	7.92	7.93	7.97	7.63	8.1	8.18	7.79	7.95	8.01	7.97													YAL043C	>0.9999	YKL063C	>0.9999	YNL309W	>0.9999	YLR342W-A	>0.9999
YGL101W	6.56	6.4	6.9	7.07	6.8	6.94	7.08	7.1	5.88	6.43	7.44	7.51	6.67	6.72	6.89	7.01													YEL031W	>0.9999	YNL234W	0.7146	YFL065C	0.9867	YKL006C-A	>0.9999
YGL103W	12.59	12.67	12.66	12.74	12.62	12.59	12.69	12.66	12.6	12.64	12.76	12.75	12.72	12.7	12.7	12.62													YGL213C	>0.9999	YDL176W	>0.9999	YDR140W	>0.9999	YLR450W	>0.9999
YGL104C	5.47	5.92	5.66	6.16	6.19	6.25	6.25	6.48	6.07	5.46	6	5.87	5.7	5.91	6.6	6.48													YBR084W	>0.9999	YDL017W	>0.9999	YDL243C	>0.9999	YML013W	>0.9999
YGL105W	11.31	11.37	11.1	11.11	11.14	11.16	10.98	11.07	10.87	11.37	11.12	10.99	11.16	11.18	11.02	11.01													YBR177C	>0.9999	YAR027W	0.9662	YDL230W	>0.9999	YJL038C	>0.9999
YGL106W	9.4	9.27	9.33	9.29	9.52	9.6	9.3	9.31	9.84	9.4	9.39	9.38	9.65	9.64	9.39	9.37													YBR253W	>0.9999	YAL041W	>0.9999	YBR302C	>0.9999	YLR154C-H	>0.9999
YGL107C	7.6	7.73	7.88	7.73	7.64	7.44	7.84	7.72	7.38	7.72	7.64	7.68	7.86	7.81	7.61	7.68													YEL062W	>0.9999	YJL157C	>0.9999	YBR045C	>0.9999	YAL016C-B	>0.9999
YGL108C	8.14	8.14	7.58	7.75	8.05	8.06	7.54	7.56	7.8	8.03	7.77	7.82	8.07	7.95	7.65	7.61													YHR106W	>0.9999	YDR440W	>0.9999	YGL032C	0.2091	YGL159W	>0.9999
YGL110C	7.75	7.43	7.45	7.46	6.83	7.73	7.33	7.44	7.5	7.81	7.52	7.45	8.04	7.85	7.39	7.44													YGL006W	>0.9999	YNR040W	0.9914	YOL051W	>0.9999	YDR165W	>0.9999
YGL111W	9.28	9.05	8.92	8.56	8.03	8.37	8.15	8.09	8.3	9.17	8.72	8.84	8.56	8.4	7.86	7.84													YBR107C	>0.9999	YBL019W	>0.9999	YJR034W	>0.9999	YER174C	0.9405
YGL112C	8.03	7.88	8.33	8.3	7.7	7.9	8.13	8.23	7.59	7.92	8.51	8.38	7.89	7.92	8.19	8.14													YER003C	>0.9999	YPL156C	>0.9999	YLR342W-A	>0.9999	YDR218C	>0.9999
YGL113W	6.85	6.54	6.73	6.5	6.87	6.44	6.4	6.52	6.59	6.91	6.22	6.15	6.66	6.58	6.55	6.36													YCR012W	>0.9999	YLR321C	>0.9999	YKL006C-A	>0.9999	YLR423C	>0.9999
YGL114W	7.83	7.78	8.57	7.76	8.74	9.55	8.64	7.7	9.85	7.53	7.27	7.39	7.65	7.67	8.33	7.88													YAL064W-B	>0.9999	YGR253C	0.9992	YLR450W	>0.9999	YNL185C	>0.9999
YGL115W	8.41	8.64	8.66	8.7	8.49	8.59	8.67	8.73	8.6	8.3	8.97	8.96	8.36	8.47	8.68	8.71													YBR175W	>0.9999	YGR243W	>0.9999	YML013W	>0.9999	YKL161C	>0.9999
YGL116W	7.06	7.19	6.9	6.84	6.82	6.83	6.65	6.69	6.74	6.99	6.96	7.07	7.31	7.25	6.79	6.68													YBR074W	>0.9999	YNL309W	>0.9999	YJL038C	>0.9999	YGL129C	>0.9999
YGL117W	6.85	6.8	8.27	8.62	7.3	7.55	9.16	7.93	7.92	6.61	6.67	7.11	7.25	7.26	7.66	6.43													YGR134W	>0.9999	YFL065C	>0.9999	YAL016C-B	>0.9999	YDL055C	>0.9999
YGL119W	7.81	8.11	7.97	7.89	7.77	7.95	7.84	7.9	7.91	7.83	7.93	8.04	7.82	7.82	7.88	7.89													YPL135W	>0.9999	YDR140W	>0.9999	YGL159W	>0.9999	YLR452C	>0.9999
YGL120C	10.9	10.86	10.24	10.01	10.16	10.41	9.4	9.23	10.31	10.73	9.65	9.71	10	10.13	9.31	9.3													YFR030W	>0.9999	YDL243C	>0.9999	YDR165W	>0.9999	YFR050C	>0.9999
YGL121C	5.7	6.93	4.59	5.4	7.22	6.58	6.77	6.33	8.2	6.11	5.89	5.56	5.96	6.48	7.46	7.02													YDR052C	>0.9999	YDL230W	>0.9999	YER174C	>0.9999	YDL007W	>0.9999
YGL122C	8.74	9.28	8.98	8.79	8.5	8.59	8.42	8.49	8.58	8.82	8.83	8.82	8.76	8.75	8.48	8.58													YBR119W	>0.9999	YBR302C	>0.9999	YDR218C	0.3159	YOL033W	>0.9999
YGL123W	12.44	12.43	12.56	12.63	12.51	12.46	12.6	12.56	12.4	12.44	12.54	12.55	12.41	12.51	12.65	12.54													YCR073C	>0.9999	YBR045C	0.9262	YLR423C	>0.9999	YOR045W	>0.9999
YGL124C	6.05	6.1	6.04	6.04	6.4	5.95	6.09	5.99	6.44	6.01	6.11	6.02	6.15	6	5.99	5.97													YDR131C	>0.9999	YGL032C	>0.9999	YNL185C	>0.9999	YLR015W	>0.9999
YGL125W	10.52	10.07	10.24	10.53	10.44	10.22	10.49	10.32	10.89	10.1	9.61	9.25	10.06	9.88	10.2	10													YJL145W	>0.9999	YOL051W	>0.9999	YKL161C	>0.9999	YOL076W	>0.9999
YGL126W	5.32	5.96	6.4	6.36	6.63	6.32	6.99	6.67	6.83	5.65	6.74	6.56	6.33	6.7	7.09	6.94													YCL009C	>0.9999	YJR034W	0.2435	YGL129C	>0.9999	YMR134W	>0.9999
YGL127C	7.78	8.14	7.68	7.99	8.1	7.94	8.17	8.16	7.79	7.85	7.82	7.73	8.11	7.93	8.23	8.11													YCR057C	>0.9999	YKL006C-A	>0.9999	YDL055C	>0.9999	YAL064W	>0.9999
YGL128C	6.77	7.07	6.87	6.81	6.76	6.68	6.84	6.96	6.6	6.64	6.74	6.69	6.79	6.77	7	6.98													YKL109W	>0.9999	YLR450W	0.9262	YLR452C	>0.9999	YBR085W	>0.9999
YGL129C	7.59	7.48	7.82	7.81	7.31	7.43	7.65	7.75	7.25	7.43	7.76	7.78	7.28	7.29	7.6	7.62													YBR062C	>0.9999	YML013W	0.982	YFR050C	>0.9999	YCL063W	>0.9999
YGL130W	7.99	8.04	7.88	7.94	7.78	7.91	7.88	7.78	8.23	8	7.89	7.93	7.93	7.88	7.77	7.79													YJL049W	>0.9999	YJL038C	>0.9999	YDL007W	>0.9999	YBR080C	>0.9999
YGL131C	6.32	5.64	5.84	5.9	5.59	5.46	5.75	5.7	5.77	5.67	5.11	5.28	5.65	5.34	5.68	5.69													YHL048W	>0.9999	YLR154C-H	0.7796	YOL033W	>0.9999	YKL018C-A	>0.9999
YGL133W	8.45	7.96	8.09	8.04	8.66	8.27	7.92	7.99	8.43	8.16	7.82	7.72	8.36	8.32	7.86	7.93													YJR001W	>0.9999	YAL016C-B	0.9419	YOR045W	>0.9999	YIL111W	>0.9999
YGL134W	7.43	7.37	7.51	7.41	7.72	7.47	7.64	7.76	7.55	7.18	7.33	7.51	7.69	7.65	7.74	7.74													YLL004W	>0.9999	YGL159W	>0.9999	YLR015W	>0.9999	YDR434W	>0.9999
YGL135W	12.55	12.55	12.7	12.64	12.55	12.61	12.69	12.63	12.61	12.5	12.61	12.63	12.44	12.52	12.68	12.68													YMR016C	>0.9999	YDR165W	>0.9999	YOL076W	>0.9999	YDR489W	>0.9999
YGL136C	6.7	7.19	6.98	6.84	6.72	6.81	6.99	7.02	6.83	6.99	7.16	7.22	7.31	7.26	7	7													YNL032W	>0.9999	YER174C	>0.9999	YMR134W	>0.9999	YCR051W	>0.9999
YGL137W	10.25	10.24	9.8	10.02	10.25	10.24	9.85	9.81	10.06	10.16	9.8	9.78	10.35	10.33	9.93	9.91													YBR066C	>0.9999	YDR218C	>0.9999	YBR085W	>0.9999	YNL291C	>0.9999
YGL138C	2.77	2.5	2.91	2.5	3.71	2.35	1.98	2.09	3.02	2.42	2.53	2.19	2.93	2.15	2.13	2.43													YLR195C	>0.9999	YLR423C	>0.9999	YCL063W	>0.9999	YPL267W	>0.9999
YGL139W	7.84	7.13	7.87	7.78	7.37	7.46	7.52	7.47	7.5	7.65	7.37	7.42	7.3	7.33	7.47	7.54													YKL114C	>0.9999	YNL185C	>0.9999	YBR080C	>0.9999	YPR156C	>0.9999
YGL140C	8.14	8.46	8.08	8.1	7.93	7.82	7.97	7.98	7.92	7.93	7.91	7.9	8.25	8.04	7.94	7.98													YOR184W	>0.9999	YKL161C	>0.9999	YKL018C-A	>0.9999	YHR096C	>0.9999
YGL141W	7.11	7.53	7.26	7.41	7.33	7.29	7.71	7.61	7.6	7.03	7.31	7.26	7.33	7.26	7.65	7.59													YPL270W	>0.9999	YGL129C	>0.9999	YIL111W	>0.9999	YJL020C	>0.9999
YGL142C	6.92	6.64	7.11	7.27	6.99	6.97	7.36	7.32	7.05	6.78	6.78	6.76	6.98	6.86	7.36	7.3													YJL095W	>0.9999	YDL055C	>0.9999	YDR434W	>0.9999	YHR070W	>0.9999
YGL143C	6.35	6.81	6.95	6.83	6.87	7	6.98	6.95	7.03	6.63	6.77	6.99	6.86	7.15	7.19	7.29													YGL114W	>0.9999	YLR452C	0.9914	YDR489W	>0.9999	YDR463W	>0.9999
YGL144C	6.23	5.99	6.38	6.06	6.33	5.83	6.09	6.28	6.3	6.32	6.11	6.2	6.67	6.44	6.24	6.3													YGL226W	>0.9999	YFR050C	>0.9999	YCR051W	>0.9999	YGL128C	>0.9999
YGL145W	7.48	7.28	7.5	7.44	7.32	7.37	7.41	7.46	7.3	7.33	7.41	7.39	7.72	7.39	7.4	7.38													YIL002W-A	>0.9999	YDL007W	>0.9999	YNL291C	>0.9999	YOL031C	>0.9999
YGL146C	4.28	4.51	4.02	4.45	4.97	4.19	4.08	4.15	4.8	4.09	3.88	4	4.06	4.23	4.43	4.29													YOR012W	>0.9999	YOL033W	>0.9999	YPL267W	>0.9999	YIL053W	>0.9999
YGL147C	10.97	11.14	11.4	11.64	11.21	11.25	11.6	11.55	10.87	11.06	11.87	11.88	11.16	11.49	11.57	11.52													YNL011C	>0.9999	YOR045W	>0.9999	YHR096C	>0.9999	YAL002W	>0.9999
YGL148W	10.36	10.14	10.64	10.52	10.28	10.38	10.54	10.33	10.21	10.29	10.26	10.33	10.61	10.62	10.22	9.95													YNL121C	>0.9999	YLR015W	>0.9999	YJL020C	>0.9999	YBR229C	>0.9999
YGL150C	8.4	8.5	8.4	8.16	8.49	8.15	8.07	8.11	8.14	8.53	7.93	7.89	8.54	8.34	8.02	8.08													YBL091C-A	>0.9999	YOL076W	>0.9999	YHR070W	>0.9999	YML126C	>0.9999
YGL151W	8.88	9.12	8.58	8.7	9.13	8.83	8.64	8.59	8.84	9.01	8.68	8.6	9.4	9.41	8.53	8.58													YOR120W	>0.9999	YMR134W	>0.9999	YDR463W	>0.9999	YNR048W	>0.9999
YGL153W	8.06	7.89	7.86	7.9	8.17	8.07	7.83	7.86	8.15	8.07	7.82	7.88	8.01	8.13	7.85	7.86													YOR159C	>0.9999	YBR085W	>0.9999	YGL128C	>0.9999	YJL138C	>0.9999
YGL154C	7.06	7.27	7.29	7.18	7.54	7.15	7.62	7.43	7.53	7.16	7.15	7.21	7.62	7.74	7.43	7.47													YER107C	>0.9999	YCL063W	>0.9999	YOL031C	>0.9999	YOR359W	0.9835
YGL155W	7.27	7.86	7.72	7.69	7.07	7.27	7.46	7.48	6.85	7.32	7.91	7.93	7.64	7.6	7.38	7.6													YJL035C	>0.9999	YBR080C	>0.9999	YIL053W	>0.9999	YDR430C	>0.9999
YGL156W	7.37	7.92	6.87	7.27	8	7.74	7.59	7.57	8.72	7.58	7.2	6.82	7.28	7.51	7.88	7.75													YBL028C	>0.9999	YKL018C-A	>0.9999	YAL002W	>0.9999	YER077C	>0.9999
YGL157W	9.29	9.28	9.55	9.67	9.22	9.43	9.87	9.76	9.41	8.88	9.69	9.61	8.63	8.67	9.68	9.84													YOR065W	>0.9999	YIL111W	0.7478	YBR229C	>0.9999	YAL046C	>0.9999
YGL158W	6.16	5.25	4.1	3.07	4.08	3.99	3.25	3.34	4.64	5.14	3.73	3.76	4.19	4.28	3.34	3.42													YDR195W	>0.9999	YDR434W	>0.9999	YML126C	>0.9999	YHR080C	>0.9999
YGL159W	6.04	6.25	6.79	6.68	6.16	6.36	6.8	6.83	7.04	6.13	7.02	6.91	6.29	6.19	6.93	6.88													YCR107W	>0.9999	YDR489W	>0.9999	YNR048W	>0.9999	YOR286W	>0.9999
YGL160W	6.99	7.3	7.37	7.32	7.24	7.27	7.37	7.45	6.72	7.2	7.34	7.28	7.7	7.63	7.46	7.47													YPL196W	>0.9999	YCR051W	>0.9999	YJL138C	>0.9999	YIR024C	>0.9999
YGL161C	8.61	8.79	8.67	8.92	8.93	8.91	8.94	8.95	9.14	8.61	8.92	8.9	8.75	8.7	9.01	9.01													YBL063W	>0.9999	YNL291C	>0.9999	YOR359W	>0.9999	YBR247C	>0.9999
YGL162W	6.98	6.97	6.94	6.66	7.15	6.92	6.71	6.68	5.96	6.89	6.59	6.76	7.78	7.95	6.6	6.76													YOR048C	>0.9999	YPL267W	>0.9999	YDR430C	>0.9999	YBR130C	>0.9999
YGL163C	7.45	7.79	7.19	7.2	7.82	7.44	7.36	7.2	7.45	7.45	7.37	7.37	7.89	8.05	7.39	7.43													YLR436C	>0.9999	YPR156C	>0.9999	YER077C	>0.9999	YKL002W	>0.9999
YGL164C	8.32	8.51	7.88	8.06	8.68	8.29	7.8	7.99	8.53	8.49	8.02	8.14	8.47	8.56	7.98	8.07													YBR235W	>0.9999	YHR096C	0.5744	YAL046C	>0.9999	YML022W	>0.9999
YGL166W	6.2	6.22	6.42	6.3	6.29	6.3	6.81	6.79	6.51	6.32	6.67	6.79	6.4	6.19	7.1	6.99													YLR105C	0.9994	YJL020C	>0.9999	YHR080C	>0.9999	YNL175C	>0.9999
YGL167C	9.47	9.59	9.72	9.69	9.31	9.32	9.67	9.71	9.18	9.43	9.5	9.42	9.51	9.35	9.67	9.79													YER083C	>0.9999	YHR070W	0.9977	YOR286W	>0.9999	YAL036C	>0.9999
YGL168W	5.8	5.8	6.18	5.88	5.66	5.66	6.18	6.03	5.71	5.21	5.82	6.05	6.2	5.91	5.88	5.85													YER024W	>0.9999	YDR463W	>0.9999	YIR024C	>0.9999	YCR086W	>0.9999
YGL169W	7.56	7.22	7.53	7.03	6.51	6.93	6.72	6.78	6.86	7.45	7.21	7.23	7.17	6.87	6.62	6.69													YPR159W	>0.9999	YGL128C	>0.9999	YBR247C	>0.9999	YNL307C	>0.9999
YGL170C	2.56	2.52	2.46	1.88	2.35	0.95	2	2.09	1.91	2.56	2.08	2.72	2.53	2.34	1.8	2.47													YGL258W-A	>0.9999	YOL031C	>0.9999	YBR130C	>0.9999	YDL247W	>0.9999
YGL171W	9.61	9.3	9.31	8.77	8.44	8.75	7.94	8.11	8.32	9.7	8.8	8.94	9.17	9.03	7.83	7.93													YER138W-A	>0.9999	YIL053W	>0.9999	YKL002W	>0.9999	YAL043C	>0.9999
YGL172W	8.05	8.19	8.51	8.4	7.99	8.04	8.36	8.42	7.85	8.1	8.51	8.57	8.24	8.3	8.32	8.35													YGR111W	>0.9999	YAL002W	0.7146	YML022W	>0.9999	YEL031W	>0.9999
YGL173C	10.26	10.22	9.82	9.42	10.02	9.73	9.58	9.61	9.71	10.24	9.52	9.45	9.91	9.95	9.56	9.72													YIL048W	>0.9999	YBR229C	>0.9999	YNL175C	>0.9999	YGL213C	>0.9999
YGL174W	6.61	6.6	6.54	6.37	6.48	6.36	6.44	6.54	5.93	6.78	6.68	6.77	6.77	6.73	6.49	6.55													YFL038C	>0.9999	YML126C	>0.9999	YAL036C	>0.9999	YBR084W	>0.9999
YGL175C	3.9	3.67	4.22	3.95	4.17	3.68	3.69	4.13	3.56	4.03	4.07	4.28	4.37	4.83	3.86	3.97													YPR024W	>0.9999	YNR048W	>0.9999	YCR086W	>0.9999	YBR177C	>0.9999
YGL176C	7.06	7.49	6.97	7.07	7.21	6.94	6.95	6.99	6.68	7.31	6.78	6.8	7.47	7.41	7.03	7.01													YBL003C	>0.9999	YJL138C	>0.9999	YNL307C	>0.9999	YBR253W	>0.9999
YGL178W	8.51	8.79	8.65	8.16	8.52	8.3	8.16	8.15	8.43	8.43	7.91	8.06	8.35	8.26	8.09	8.03													YJR013W	>0.9999	YOR359W	>0.9999	YDL247W	>0.9999	YEL062W	>0.9999
YGL179C	5.03	5.27	4.99	5.43	5.64	5.2	5.58	5.53	5.81	5.11	5.35	5.3	5.34	5.69	5.66	5.63													YGL116W	>0.9999	YDR430C	0.8377	YAL043C	>0.9999	YHR106W	>0.9999
YGL180W	5.53	6.03	5.89	6.25	6.26	5.74	6.75	6.15	6.71	5.36	5.42	5.63	5.59	5.7	6.17	5.98													YKL042W	>0.9999	YER077C	>0.9999	YEL031W	>0.9999	YGL006W	>0.9999
YGL181W	8.07	8.4	8.11	8.3	8.51	8.41	8.45	8.37	8.54	8.15	8.12	7.96	8.29	8.28	8.62	8.55													YPR168W	>0.9999	YAL046C	>0.9999	YGL213C	>0.9999	YBR107C	>0.9999
YGL183C	2.83	3.07	3.25	3.41	3.33	2.94	3.17	3.22	3.03	3.05	3.37	3.3	3.37	3.15	3.18	3.13													YDR389W	>0.9999	YHR080C	>0.9999	YBR084W	>0.9999	YER003C	>0.9999
YGL184C	6.88	6.87	6.99	8.26	7.14	7.29	8.37	8.08	7.6	6.16	6.6	7	7.2	7.35	7.64	6.91													YDL088C	>0.9999	YOR286W	>0.9999	YBR177C	>0.9999	YCR012W	>0.9999
YGL185C	7	6.95	6.46	6.57	7.18	7.26	6.77	6.93	7.67	6.86	6.71	6.58	7.07	6.95	7.15	7.14													YBR254C	>0.9999	YIR024C	>0.9999	YBR253W	>0.9999	YAL064W-B	>0.9999
YGL186C	9.09	9.36	9.53	9.5	9.74	9.7	9.79	9.56	9.73	9.2	9.19	9.17	9.92	9.9	9.58	9.54													YKR095W	>0.9999	YBR247C	>0.9999	YEL062W	>0.9999	YBR175W	>0.9999
YGL187C	10.28	10.54	10.11	10.48	10.36	10.37	10.34	10.43	10.29	10.56	10.68	10.65	9.94	10.48	10.62	10.37													YKL140W	>0.9999	YBR130C	>0.9999	YHR106W	>0.9999	YBR074W	>0.9999
YGL188C-A	3.21	3.62	3.29	3.8	3.19	2.95	3.23	3.55	1.94	3.99	4.35	4.75	4.49	4.19	2.64	2.84													YAR064W	>0.9999	YKL002W	>0.9999	YGL006W	>0.9999	YGR134W	>0.9999
YGL189C	12.12	12.24	12.12	12.17	12.18	12.08	12.24	12.22	12.13	12.31	12.31	12.23	12.22	12.22	12.31	12.22													YKR049C	>0.9999	YML022W	>0.9999	YBR107C	>0.9999	YPL135W	>0.9999
YGL189C	12.12	12.23	12.14	12.19	12.05	12	12.18	12.24	12.03	12.31	12.35	12.27	12.27	12.2	12.27	12.24													YDR016C	>0.9999	YNL175C	>0.9999	YER003C	>0.9999	YFR030W	>0.9999
YGL190C	8.39	8.45	8.25	8.34	8.43	8.34	8.27	8.27	8.03	8.49	8.16	8.05	8.38	8.4	8.29	8.17													YAL001C	>0.9999	YAL036C	>0.9999	YCR012W	>0.9999	YDR052C	>0.9999
YGL191W	10.12	10.26	9.74	10.34	10.46	10.55	10.22	10.22	10.48	10.27	10.31	10.33	9.7	10.22	10.36	10.11													YMR251W	>0.9999	YCR086W	>0.9999	YAL064W-B	0.9936	YBR119W	>0.9999
YGL192W	5.95	5.75	5.73	5.75	6.03	5.82	5.79	5.66	5.69	6.02	5.61	5.61	6.2	6.35	5.86	5.69													YLR214W	>0.9999	YNL307C	>0.9999	YBR175W	>0.9999	YCR073C	>0.9999
YGL194C	6.93	6.97	6.62	6.55	6.89	6.93	6.53	6.6	7.04	6.77	7.2	7.27	7.26	7.39	6.51	6.52													YPL231W	>0.9999	YDL247W	>0.9999	YBR074W	>0.9999	YDR131C	>0.9999
YGL195W	10.21	10.2	9.98	9.83	10.09	9.95	9.73	9.75	9.84	10.12	9.54	9.37	10.21	9.97	9.59	9.67													YKR063C	>0.9999	YAL043C	>0.9999	YGR134W	>0.9999	YJL145W	>0.9999
YGL196W	7.15	7	7.44	7.66	7.42	7.32	7.73	7.95	7.76	6.87	7.6	7.58	7.26	7.42	7.85	7.86													YEL017W	>0.9999	YEL031W	0.9999	YPL135W	>0.9999	YCL009C	>0.9999
YGL197W	8.36	8.56	8.03	8.13	8.39	8.04	8.07	8.08	8.09	8.42	7.93	7.78	8.52	8.27	8.06	7.95													YLR356W	>0.9999	YGL213C	>0.9999	YFR030W	>0.9999	YCR057C	0.9946
YGL198W	8.04	8.43	8.49	8.67	8.62	8.64	8.97	8.93	8.76	8.08	8.75	8.8	8.49	8.69	9.07	9.03													YKL010C	>0.9999	YBR084W	0.9977	YDR052C	>0.9999	YKL109W	>0.9999
YGL200C	10.27	10.57	10.38	10.55	10.52	10.53	10.69	10.65	10.43	10.37	10.75	10.74	10.26	10.41	10.67	10.66													YJL117W	>0.9999	YBR177C	>0.9999	YBR119W	>0.9999	YBR062C	>0.9999
YGL201C	8	7.72	8.23	8.07	8.45	8.38	8.25	8.05	8.66	7.73	7.57	7.38	7.64	7.63	8.05	8.19													YDR117C	>0.9999	YBR253W	>0.9999	YCR073C	>0.9999	YJL049W	>0.9999
YGL202W	10.96	10.81	11.16	11.23	10.96	11.07	11.34	11.12	10.83	10.8	10.6	10.63	10.7	10.87	11.05	10.8													YLR312C	>0.9999	YEL062W	>0.9999	YDR131C	>0.9999	YHL048W	>0.9999
YGL203C	9.93	9.79	9.37	9.34	9.93	9.67	9.18	9.3	9.68	9.85	8.97	9.01	9.77	9.7	9.23	9.19													YDL060W	>0.9999	YHR106W	>0.9999	YJL145W	0.8745	YJR001W	>0.9999
YGL205W	3.14	3.5	2.86	3.42	3.21	2.76	3.83	3.57	3.59	3.6	3.57	3.11	3.41	3.42	3.71	3.56													YIL087C	>0.9999	YGL006W	>0.9999	YCL009C	>0.9999	YLL004W	>0.9999
YGL206C	9.73	9.62	9.78	9.76	9.75	9.71	9.74	9.79	9.48	9.69	9.24	8.95	9.54	9.44	9.71	9.77													YMR001C	>0.9999	YBR107C	>0.9999	YCR057C	>0.9999	YMR016C	>0.9999
YGL207W	9.65	9.83	9.58	9.53	9.71	9.61	9.45	9.43	9.7	9.65	9.34	9.17	9.75	9.52	9.35	9.4													YPL126W	>0.9999	YER003C	>0.9999	YKL109W	0.9998	YNL032W	>0.9999
YGL208W	7.12	6.91	7.04	7.31	7.56	7.5	7.63	7.53	7.9	6.67	6.84	6.78	6.88	7.08	7.66	7.61													YMR246W	>0.9999	YCR012W	>0.9999	YBR062C	>0.9999	YBR066C	0.9972
YGL209W	7.55	7.57	8.56	8.41	7.52	7.67	8.32	8.27	7.87	7.51	8.09	8.04	7.87	7.51	8.54	8.74													YGR095C	>0.9999	YAL064W-B	>0.9999	YJL049W	>0.9999	YLR195C	>0.9999
YGL210W	7.86	7.39	7.94	7.79	7.92	7.86	7.76	7.9	8.12	7.76	7.79	7.78	7.87	7.79	7.99	7.9													YOR358W	>0.9999	YBR175W	>0.9999	YHL048W	>0.9999	YKL114C	>0.9999
YGL211W	7.34	7.15	7.33	7.13	7.11	7.07	6.86	6.96	7.13	7.11	7.33	7.42	7	7.1	6.94	6.96													YLL050C	>0.9999	YBR074W	>0.9999	YJR001W	>0.9999	YOR184W	>0.9999
YGL212W	6.38	6.81	5.79	5.8	6.69	6.43	5.71	5.74	6.55	6.36	6.11	6.17	6.85	7.02	5.75	5.87													YDL186W	>0.9999	YGR134W	>0.9999	YLL004W	>0.9999	YPL270W	>0.9999
[truncated: 3,745 more rows]

## Sheet: endometabolites
[amino acid] (ng/ml)	air+pH+ C1	air+pH+ C2	air+pH-C1	air+pH-C2	air-pH+C1	air-pH+C2	air-pH-C1	air-pH-C2	air+pH+ R1	air+pH+ R2	air+pH-R1	air+pH-R2	air-pH+R1	air-pH+R2	air-pH-R1	air-pH-R2
Alanine	0.174	0.1856	0.1617	0.1114	0.1593	0.1035	0.2435	0.2258	0.33	0.1903	0.3259	0.2942	0.3941	0.4388	0.074	0.3502
Arginine	0.0033	0.0045	0.0013	0.0015	0.0017	0.0015	0.0018	0.0022	0.0017	0.0018	0.0022	0.0024	0.0039	0.0027	0.0016	0.0021
Asparagine	0.0305	0.0415	0.0151	0.0175	0.0398	0.0353	0.0152	0.0422	0.0476	0.0234	0.0303	0.0261	0.0357	0.0105	0.0331	0.0429
Aspartic acid	0.2596	0.1348	0.1735	0.1547	0.2156	0.046	0.1325	0.1347	0.1915	0.2427	0.2407	0.1202	0.1304	0.118	0.1367	0.1322
Cysteine	0.0745	0.1256	0.1099	0.0548	0.0807	0.0887	0.0546		0.1511		0.0726	0.057	0.188	0.1042		0.0594
Glutamic acid	0.3119	0.4314	0.2362	0.2371	0.2074	0.2138	0.5785	0.557	0.6463	0.5735	0.5628	0.5689	0.2128	0.322	0.1549	0.1915
Glutamine	0.0301	0.0274	0.0195	0.0189	0.0233	0.02	0.0144	0.0136	0.0192	0.0141	0.0209	0.0207	0.039	0.0232	0.0223	0.0279
Glycine	0.4006	0.4066	0.2369	0.2638	0.6484	0.4592	0.2534	0.2291	0.2072	0.192	0.4405	0.5774	0.1828	0.2769	0.2759	0.221
Histidine	0.0075	0.0099	0.0025	0.0034	0.0032	0.0022	0.0036	0.0037	0.0041	0.0039	0.0034	0.0037	0.0062	0.0046	0.0026	0.0038
Isoleucine	0.0745	0.0794	0.1034	0.1077	0.0652	0.0588	0.0822	0.0877	0.0992	0.0966	0.1055	0.1068	0.0417	0.0907	0.0575	0.0812
Leucine	0.0449	0.0443	0.0266	0.0293	0.0146	0.0154	0.0696	0.0521	0.046	0.0446	0.0393	0.0398	0.0181	0.0163	0.0356	0.0378
Lysine	0.0406	0.048	0.0275	0.0228	0.037	0.0297	0.0171	0.0265	0.0307	0.0307	0.0293	0.0335	0.0406	0.0344	0.0284	0.0225
Methionine	0.0095	0.0112	0.0026	0.0019	0.0085	0.0099	0.0064	0.0057	0.0016	0.0021	0.0088	0.0077	0.0025	0.0025	0.002	0.0052
Phenylalanine	0.0067	0.0032	0.0034	0.0098	0.0048	0.0037	0.0044	0.0022	0.0031	0.0085	0.0061	0.0072	0.0042	0.0087	0.0042	0.0042
Proline	0.0102	0.0086	0.005	0.0035	0.0111	0.009	0.0103	0.0096	0.0111	0.0078	0.0041	0.0054	0.0069	0.0064	0.0115	0.0107
Serine	0.155	0.1334	0.0645	0.0634	0.1152	0.1042	0.1647	0.1654	0.1388	0.1284	0.1726	0.1953	0.2021	0.2405	0.1015	0.0826
Threonine	0.0127	0.0128	0.0167	0.0233	0.0074	0.0099	0.0191	0.0239	0.0226	0.0227	0.0167	0.0199	0.0292	0.0289	0.0139	0.0105
Tryptophan	0.0003	0.0014	0.0015	0.0015	0.0018	0.0014	0.0005	0.0007	0.0028	0.0024	0.0011	0.0012	0.0002	0.0007	0.0001	0.0002
Tyrosine	0.0236	0.0108	0.0065	0.0061	0.0099	0.0081	0.0138	0.0165	0.0059	0.0095	0.0061	0.0081	0.0056	0.0054	0.0074	0.0062
Valine	0.0464	0.0721	0.0434	0.0429	0.0252	0.0293	0.0806	0.077	0.0457	0.0548	0.0804	0.0767	0.0266	0.0177	0.0222	0.0443
[TCA cycle intermediate] (ng/ml)	air+pH+ C1	air+pH+ C2	air+pH-C1	air+pH-C2	air-pH+C1	air-pH+C2	air-pH-C1	air-pH-C2	air+pH+ R1	air+pH+ R2	air+pH-R1	air+pH-R2	air-pH+R1	air-pH+R2	air-pH-R1	air-pH-R2
Citric acid	0.3072	0.2367	0.1516	0.1614	0.2741	0.1721	0.1723	0.1684	0.1624	0.162	0.1591	0.1558	0.1475	0.152	0.3607	0.1198
Fumaric acid	0.4549	0.1988	0.1861	0.5214	0.1696	0.147	0.1756	0.1177	0.1228	0.0684	0.1281	0.1088	0.1723	0.0842	0.1122	0.1394
Isocitric acid	0.4309	0.1878	0.1016	0.2378	0.2555	0.2505	0.2508	0.2451	0.2364	0.2358	0.2316	0.2267	0.2146	0.2213	0.227	0.1744
Malic acid	0.2952	0.2938	0.1986	0.1876	0.1672	0.142	0.1296	0.112	0.1099	0.0968	0.0846	0.0798	0.0804	0.0732	0.0536	0.0466
Succinic acid	0.0419	0.0451	0.048	0.0494	0.0435	0.0473	0.0483	0.0516	0.0571	0.0562	0.076	0.0642	0.0911	0.0919	0.0662	0.0632
alpha-Ketoglutaric acid	0.1438	0.1262	0.2204	0.2234	0.1515	0.1763	0.1561	0.1531	0.2941	0.2732	0.1687	0.1729	0.105	0.2572	0.3683	0.3538
cis-Aconitic acid	0.0307	0.0329	0.0455	0.0451	0.0207	0.0279	0.0357	0.0441	0.0376	0.0354	0.0467	0.0531	0.0266	0.0273	0.0478	0.0469
Sodium pyruvate	0.0127	0.0103	0.0197	0.0258	0.0333	0.0272	0.0164	0.0163	0.0245	0.0237	0.01	0.011	0.0217	0.0199	0.021	0.0188

## Sheet: significantGOenrichments
TRANSCRIPTOME
R vs C	paired ttest at 0.05 + 1.5 fold change in relative expression
all 38
Gene Ontology term - C	Cluster frequency	Genome frequency	Corrected p-value	FDR	FP	Genes annotated to the term
ribonucleoprotein granule	5 of 38 genes, 13.2%	125 of 7166 genes, 1.7%	0.0349	0.08	0.08	YFL017W-A, YDR206W, YJR137C, YDL160C, YKL204W
cytoplasmic ribonucleoprotein granule	5 of 38 genes, 13.2%	125 of 7166 genes, 1.7%	0.0349	0.04	0.08	YFL017W-A, YDR206W, YJR137C, YDL160C, YKL204W
17 upregulated
Gene Ontology term - C	Cluster frequency	Genome frequency	Corrected p-value	FDR	FP	Genes annotated to the term
rough endoplasmic reticulum	2 of 17 genes, 11.8%	12 of 7166 genes, 0.2%	0.01723	0.06	0.06	YKL154W, YLR292C
rough endoplasmic reticulum membrane	2 of 17 genes, 11.8%	12 of 7166 genes, 0.2%	0.01723	0.03	0.06	YKL154W, YLR292C
R vs C air+	paired ttest at 0.05 + 1.5 fold change in relative expression
all 49
Gene Ontology term - P	Cluster frequency	Genome frequency	Corrected p-value	FDR	FP	Genes annotated to the term
carboxylic acid metabolic process	11 of 48 genes, 22.9%	375 of 7166 genes, 5.2%	0.0088	0	0	YEL046C, YIR034C, YBR115C, YPL095C, YGR087C, YGL009C, YMR272C, YOR040W, YER069W, YKL055C, YOR344C
oxoacid metabolic process	11 of 48 genes, 22.9%	389 of 7166 genes, 5.4%	0.01236	0	0	YEL046C, YIR034C, YBR115C, YPL095C, YGR087C, YGL009C, YMR272C, YOR040W, YER069W, YKL055C, YOR344C
organic acid metabolic process	11 of 48 genes, 22.9%	390 of 7166 genes, 5.4%	0.01266	0	0	YEL046C, YIR034C, YBR115C, YPL095C, YGR087C, YGL009C, YMR272C, YOR040W, YER069W, YKL055C, YOR344C
Gene Ontology term - F	Cluster frequency	Genome frequency	Corrected p-value	FDR	FP	Genes annotated to the term
inorganic molecular entity transmembrane transporter activity	8 of 48 genes, 16.7%	242 of 7166 genes, 3.4%	0.01234	0.06	0.06	YDR384C, YLL053C, YGR191W, YPR020W, YKR103W, YPL134C, YBR220C, YLL052C
water transmembrane transporter activity	2 of 48 genes, 4.2%	4 of 7166 genes, 0.1%	0.01829	0.05	0.1	YLL053C, YLL052C
water channel activity	2 of 48 genes, 4.2%	4 of 7166 genes, 0.1%	0.01829	0.0333	0.1	YLL053C, YLL052C
30 downregulated
Gene Ontology term - P	Cluster frequency	Genome frequency	Corrected p-value	FDR	FP	Genes annotated to the term
carboxylic acid metabolic process	9 of 29 genes, 31.0%	375 of 7166 genes, 5.2%	0.00241	0	0	YEL046C, YIR034C, YBR115C, YGR087C, YGL009C, YMR272C, YER069W, YKL055C, YOR344C
oxoacid metabolic process	9 of 29 genes, 31.0%	389 of 7166 genes, 5.4%	0.00325	0	0	YEL046C, YIR034C, YBR115C, YGR087C, YGL009C, YMR272C, YER069W, YKL055C, YOR344C
organic acid metabolic process	9 of 29 genes, 31.0%	390 of 7166 genes, 5.4%	0.00332	0	0	YEL046C, YIR034C, YBR115C, YGR087C, YGL009C, YMR272C, YER069W, YKL055C, YOR344C
alpha-amino acid metabolic process	6 of 29 genes, 20.7%	141 of 7166 genes, 2.0%	0.00392	0	0	YEL046C, YIR034C, YBR115C, YER069W, YGR087C, YGL009C
alpha-amino acid biosynthetic process	5 of 29 genes, 17.2%	97 of 7166 genes, 1.4%	0.00865	0	0	YEL046C, YIR034C, YBR115C, YER069W, YGL009C
cellular amino acid biosynthetic process	5 of 29 genes, 17.2%	108 of 7166 genes, 1.5%	0.0145	0.0133	0.08	YEL046C, YIR034C, YBR115C, YER069W, YGL009C
organic acid biosynthetic process	6 of 29 genes, 20.7%	195 of 7166 genes, 2.7%	0.02435	0.0257	0.18	YEL046C, YIR034C, YBR115C, YER069W, YGL009C, YOR344C
carboxylic acid biosynthetic process	6 of 29 genes, 20.7%	195 of 7166 genes, 2.7%	0.02435	0.0225	0.18	YEL046C, YIR034C, YBR115C, YER069W, YGL009C, YOR344C
cellular amino acid metabolic process	6 of 29 genes, 20.7%	215 of 7166 genes, 3.0%	0.04167	0.0311	0.28	YEL046C, YIR034C, YBR115C, YER069W, YGR087C, YGL009C
pseudohyphal growth	4 of 29 genes, 13.8%	75 of 7166 genes, 1.0%	0.04959	0.034	0.34	YNL068C, YOR140W, YOR030W, YJR147W
19 upregulated
Gene Ontology term - F	Cluster frequency	Genome frequency	Corrected p-value	FDR	FP	Genes annotated to the term
water transmembrane transporter activity	2 of 19 genes, 10.5%	4 of 7166 genes, 0.1%	0.00059	0	0	YLL053C, YLL052C
water channel activity	2 of 19 genes, 10.5%	4 of 7166 genes, 0.1%	0.00059	0	0	YLL053C, YLL052C
substrate-specific channel activity	2 of 19 genes, 10.5%	16 of 7166 genes, 0.2%	0.01172	0.06	0.18	YLL053C, YLL052C
channel activity	2 of 19 genes, 10.5%	17 of 7166 genes, 0.2%	0.01326	0.055	0.22	YLL053C, YLL052C
passive transmembrane transporter activity	2 of 19 genes, 10.5%	17 of 7166 genes, 0.2%	0.01326	0.044	0.22	YLL053C, YLL052C
inorganic molecular entity transmembrane transporter activity	4 of 19 genes, 21.1%	242 of 7166 genes, 3.4%	0.04942	0.1	0.6	YPR020W, YPL134C, YLL053C, YLL052C
R vs C air-	paired ttest at 0.05 + 1.5 fold change in relative expression
all 44
Gene Ontology term - F	Cluster frequency	Genome frequency	Corrected p-value	FDR	FP	Genes annotated to the term
water transmembrane transporter activity	2 of 44 genes, 4.5%	4 of 7166 genes, 0.1%	0.00767	0.02	0.02	YLL053C, YLL052C
water channel activity	2 of 44 genes, 4.5%	4 of 7166 genes, 0.1%	0.00767	0.01	0.02	YLL053C, YLL052C
heme binding	2 of 44 genes, 4.5%	7 of 7166 genes, 0.1%	0.02655	0.0933	0.28	YGR088W, YDR178W
tetrapyrrole binding	2 of 44 genes, 4.5%	7 of 7166 genes, 0.1%	0.02655	0.07	0.28	YGR088W, YDR178W
34 downregulated
Gene Ontology term - F	Cluster frequency	Genome frequency	Corrected p-value	FDR	FP	Genes annotated to the term
heme binding	2 of 34 genes, 5.9%	7 of 7166 genes, 0.1%	0.01175	0.1	0.1	YGR088W, YDR178W
tetrapyrrole binding	2 of 34 genes, 5.9%	7 of 7166 genes, 0.1%	0.01175	0.05	0.1	YGR088W, YDR178W
10 upregulated
Gene Ontology term - F	Cluster frequency	Genome frequency	Corrected p-value	FDR	FP	Genes annotated to the term
water transmembrane transporter activity	2 of 10 genes, 20.0%	4 of 7166 genes, 0.1%	9.45e-05	0.02	0.02	YLL053C, YLL052C
water channel activity	2 of 10 genes, 20.0%	4 of 7166 genes, 0.1%	9.45e-05	0.01	0.02	YLL053C, YLL052C
substrate-specific channel activity	2 of 10 genes, 20.0%	16 of 7166 genes, 0.2%	0.00187	0.02	0.06	YLL053C, YLL052C
channel activity	2 of 10 genes, 20.0%	17 of 7166 genes, 0.2%	0.00212	0.015	0.06	YLL053C, YLL052C
passive transmembrane transporter activity	2 of 10 genes, 20.0%	17 of 7166 genes, 0.2%	0.00212	0.012	0.06	YLL053C, YLL052C
Gene Ontology term	Cluster frequency	Genome frequency	Corrected p-value	FDR	FP	Genes annotated to the term
integral component of plasma membrane	3 of 10 genes, 30.0%	69 of 7166 genes, 1.0%	0.00263	0.02	0.02	YEL065W, YLL053C, YLL052C
intrinsic component of plasma membrane	3 of 10 genes, 30.0%	89 of 7166 genes, 1.2%	0.00563	0.01	0.02	YEL065W, YLL053C, YLL052C
plasma membrane part	3 of 10 genes, 30.0%	129 of 7166 genes, 1.8%	0.01683	0.0267	0.08	YEL065W, YLL053C, YLL052C
R vs C pH+	paired ttest at 0.05 + 1.5 fold change in relative expression
all 31
Gene Ontology term - F	Cluster frequency	Genome frequency	Corrected p-value	FDR	FP	Genes annotated to the term
solute:proton symporter activity	3 of 31 genes, 9.7%	40 of 7166 genes, 0.6%	0.02794	0.34	0.34	YLR081W, YDL245C, YBR220C
protein serine/threonine kinase inhibitor activity	2 of 31 genes, 6.5%	10 of 7166 genes, 0.1%	0.03429	0.2	0.4	YEL019C, YGR233C
solute:cation symporter activity	3 of 31 genes, 9.7%	43 of 7166 genes, 0.6%	0.0346	0.1333	0.4	YLR081W, YDL245C, YBR220C
symporter activity	3 of 31 genes, 9.7%	44 of 7166 genes, 0.6%	0.03702	0.105	0.42	YLR081W, YDL245C, YBR220C
25 downregulated
Gene Ontology term - F	Cluster frequency	Genome frequency	Corrected p-value	FDR	FP	Genes annotated to the term
solute:proton symporter activity	3 of 25 genes, 12.0%	40 of 7166 genes, 0.6%	0.01055	0.12	0.12	YLR081W, YDL245C, YBR220C
solute:cation symporter activity	3 of 25 genes, 12.0%	43 of 7166 genes, 0.6%	0.01308	0.09	0.18	YLR081W, YDL245C, YBR220C
symporter activity	3 of 25 genes, 12.0%	44 of 7166 genes, 0.6%	0.01401	0.06	0.18	YLR081W, YDL245C, YBR220C
6 upregulated
Gene Ontology term - F	Cluster frequency	Genome frequency	Corrected p-value	FDR	FP	Genes annotated to the term
protein serine/threonine kinase inhibitor activity	2 of 6 genes, 33.3%	10 of 7166 genes, 0.1%	0.00028	0	0	YEL019C, YGR233C
protein kinase inhibitor activity	2 of 6 genes, 33.3%	12 of 7166 genes, 0.2%	0.00042	0	0	YEL019C, YGR233C
kinase inhibitor activity	2 of 6 genes, 33.3%	13 of 7166 genes, 0.2%	0.00049	0	0	YEL019C, YGR233C
enzyme inhibitor activity	2 of 6 genes, 33.3%	49 of 7166 genes, 0.7%	0.00742	0.005	0.02	YEL019C, YGR233C
protein kinase regulator activity	2 of 6 genes, 33.3%	54 of 7166 genes, 0.8%	0.00902	0.004	0.02	YEL019C, YGR233C
kinase regulator activity	2 of 6 genes, 33.3%	57 of 7166 genes, 0.8%	0.01004	0.0033	0.02	YEL019C, YGR233C
R vs C pH-	paired ttest at 0.05 + 1.5 fold change in relative expression
all 96
Gene Ontology term - P	Cluster frequency	Genome frequency	Corrected p-value	FDR	FP	Genes annotated to the term
cellular amino acid biosynthetic process	20 of 95 genes, 21.1%	108 of 7166 genes, 1.5%	1.43e-15	0	0	YOR303W, YOR130C, YAL062W, YDR035W, YGL009C, YMR108W, YBR249C, YJR109C, YJL088W, YOL140W, YHR018C, YNL104C, YEL046C, YIR034C, YBR115C, YOL058W, YGL125W, YER069W, YOR108W, YMR062C
organic acid biosynthetic process	23 of 95 genes, 24.2%	195 of 7166 genes, 2.7%	1.15e-13	0	0	YOR303W, YOR130C, YAL062W, YDR035W, YER073W, YGL009C, YMR108W, YBR249C, YDR127W, YJR109C, YLL027W, YJL088W, YOL140W, YHR018C, YNL104C, YEL046C, YIR034C, YBR115C, YOL058W, YGL125W, YER069W, YOR108W, YMR062C
carboxylic acid biosynthetic process	23 of 95 genes, 24.2%	195 of 7166 genes, 2.7%	1.15e-13	0	0	YOR303W, YOR130C, YAL062W, YDR035W, YER073W, YGL009C, YMR108W, YBR249C, YDR127W, YJR109C, YLL027W, YJL088W, YOL140W, YHR018C, YNL104C, YEL046C, YIR034C, YBR115C, YOL058W, YGL125W, YER069W, YOR108W, YMR062C
alpha-amino acid biosynthetic process	17 of 95 genes, 17.9%	97 of 7166 genes, 1.4%	1.56e-12	0	0	YOR303W, YOR130C, YAL062W, YGL009C, YJR109C, YJL088W, YOL140W, YHR018C, YNL104C, YEL046C, YIR034C, YBR115C, YOL058W, YGL125W, YER069W, YOR108W, YMR062C
arginine biosynthetic process	9 of 95 genes, 9.5%	14 of 7166 genes, 0.2%	5.78e-12	0	0	YOR303W, YOR130C, YER069W, YOL058W, YJR109C, YJL088W, YMR062C, YOL140W, YHR018C
small molecule biosynthetic process	26 of 95 genes, 27.4%	345 of 7166 genes, 4.8%	5.63e-11	0	0	YFL059W, YOR303W, YOR130C, YAL062W, YDR035W, YER073W, YGL009C, YMR108W, YMR095C, YBR249C, YDR127W, YJR109C, YLL027W, YJL088W, YMR096W, YOL140W, YHR018C, YNL104C, YEL046C, YIR034C, YBR115C, YOL058W, YGL125W, YER069W, YOR108W, YMR062C
arginine metabolic process	9 of 95 genes, 9.5%	18 of 7166 genes, 0.3%	1.34e-10	0	0	YOR303W, YOR130C, YER069W, YOL058W, YJR109C, YJL088W, YMR062C, YOL140W, YHR018C
glutamine family amino acid biosynthetic process	10 of 95 genes, 10.5%	29 of 7166 genes, 0.4%	5.97e-10	0	0	YOR303W, YOR130C, YOL058W, YAL062W, YER069W, YJR109C, YJL088W, YMR062C, YOL140W, YHR018C
alpha-amino acid metabolic process	17 of 95 genes, 17.9%	141 of 7166 genes, 2.0%	9.26e-10	0	0	YOR303W, YOR130C, YAL062W, YGL009C, YJR109C, YJL088W, YOL140W, YHR018C, YNL104C, YEL046C, YIR034C, YBR115C, YOL058W, YGL125W, YER069W, YOR108W, YMR062C
cellular amino acid metabolic process	20 of 95 genes, 21.1%	215 of 7166 genes, 3.0%	1.2e-09	0	0	YOR303W, YOR130C, YAL062W, YDR035W, YGL009C, YMR108W, YBR249C, YJR109C, YJL088W, YOL140W, YHR018C, YNL104C, YEL046C, YIR034C, YBR115C, YOL058W, YGL125W, YER069W, YOR108W, YMR062C
carboxylic acid metabolic process	24 of 95 genes, 25.3%	375 of 7166 genes, 5.2%	1.94e-08	0	0	YOR303W, YOR130C, YAL062W, YDR035W, YER073W, YGL009C, YMR108W, YBR249C, YDR127W, YJR109C, YLL027W, YJL088W, YOL140W, YHR018C, YNL104C, YEL046C, YIR034C, YBR115C, YOL058W, YOR040W, YGL125W, YER069W, YOR108W, YMR062C
glutamine family amino acid metabolic process	10 of 95 genes, 10.5%	42 of 7166 genes, 0.6%	3.81e-08	0	0	YOR303W, YOR130C, YOL058W, YAL062W, YER069W, YJR109C, YJL088W, YMR062C, YOL140W, YHR018C
oxoacid metabolic process	24 of 95 genes, 25.3%	389 of 7166 genes, 5.4%	4.19e-08	0	0	YOR303W, YOR130C, YAL062W, YDR035W, YER073W, YGL009C, YMR108W, YBR249C, YDR127W, YJR109C, YLL027W, YJL088W, YOL140W, YHR018C, YNL104C, YEL046C, YIR034C, YBR115C, YOL058W, YOR040W, YGL125W, YER069W, YOR108W, YMR062C
organic acid metabolic process	24 of 95 genes, 25.3%	390 of 7166 genes, 5.4%	4.42e-08	0	0	YOR303W, YOR130C, YAL062W, YDR035W, YER073W, YGL009C, YMR108W, YBR249C, YDR127W, YJR109C, YLL027W, YJL088W, YOL140W, YHR018C, YNL104C, YEL046C, YIR034C, YBR115C, YOL058W, YOR040W, YGL125W, YER069W, YOR108W, YMR062C
small molecule metabolic process	31 of 95 genes, 32.6%	746 of 7166 genes, 10.4%	1e-06	0	0	YFL059W, YOR303W, YOR130C, YHR044C, YAL062W, YDR035W, YER073W, YGL009C, YMR108W, YMR095C, YLR245C, YBR249C, YER024W, YDR127W, YJR109C, YLL027W, YJL088W, YMR096W, YOL140W, YHR018C, YNL104C, YEL046C, YIR034C, YBR115C, YOL058W, YOR040W, YGL125W, YER069W, YOR108W, YOL059W, YMR062C
ornithine metabolic process	5 of 95 genes, 5.3%	9 of 7166 genes, 0.1%	1.58e-05	0	0	YER069W, YJL088W, YMR062C, YOL140W, YHR018C
urea cycle	4 of 95 genes, 4.2%	5 of 7166 genes, 0.1%	5.09e-05	0	0	YOR303W, YOL058W, YJR109C, YJL088W
urea metabolic process	4 of 95 genes, 4.2%	8 of 7166 genes, 0.1%	0.00069	0	0	YOR303W, YOL058W, YJR109C, YJL088W
nitrogen cycle metabolic process	4 of 95 genes, 4.2%	8 of 7166 genes, 0.1%	0.00069	0	0	YOR303W, YOL058W, YJR109C, YJL088W
ornithine biosynthetic process	3 of 95 genes, 3.2%	4 of 7166 genes, 0.1%	0.00317	0	0	YER069W, YMR062C, YOL140W
chorismate biosynthetic process	3 of 95 genes, 3.2%	4 of 7166 genes, 0.1%	0.00317	0	0	YBR249C, YDR127W, YDR035W
chorismate metabolic process	3 of 95 genes, 3.2%	4 of 7166 genes, 0.1%	0.00317	0	0	YBR249C, YDR127W, YDR035W
pyridoxine biosynthetic process	3 of 95 genes, 3.2%	5 of 7166 genes, 0.1%	0.00786	0.0009	0.02	YFL059W, YMR096W, YMR095C
branched-chain amino acid biosynthetic process	4 of 95 genes, 4.2%	14 of 7166 genes, 0.2%	0.0093	0.0008	0.02	YNL104C, YOR108W, YGL009C, YMR108W
carboxylic acid transport	7 of 95 genes, 7.4%	74 of 7166 genes, 1.0%	0.01784	0.0008	0.02	YDR384C, YOR130C, YKL120W, YBR068C, YDR046C, YGR142W, YGR191W
organic acid transport	7 of 95 genes, 7.4%	75 of 7166 genes, 1.0%	0.01946	0.0008	0.02	YDR384C, YOR130C, YKL120W, YBR068C, YDR046C, YGR142W, YGR191W
pyridoxine metabolic process	3 of 95 genes, 3.2%	7 of 7166 genes, 0.1%	0.02698	0.0007	0.02	YFL059W, YMR096W, YMR095C
dicarboxylic acid biosynthetic process	4 of 95 genes, 4.2%	19 of 7166 genes, 0.3%	0.03424	0.0007	0.02	YBR249C, YDR127W, YAL062W, YDR035W
branched-chain amino acid metabolic process	4 of 95 genes, 4.2%	20 of 7166 genes, 0.3%	0.04237	0.0007	0.02	YNL104C, YOR108W, YGL009C, YMR108W
leucine biosynthetic process	3 of 95 genes, 3.2%	8 of 7166 genes, 0.1%	0.04276	0.0007	0.02	YNL104C, YOR108W, YGL009C
Gene Ontology term - F	Cluster frequency	Genome frequency	Corrected p-value	FDR	FP	Genes annotated to the term
3-deoxy-7-phosphoheptulonate synthase activity	2 of 95 genes, 2.1%	2 of 7166 genes, 0.0%	0.01843	0.04	0.04	YBR249C, YDR035W
2-isopropylmalate synthase activity	2 of 95 genes, 2.1%	2 of 7166 genes, 0.0%	0.01843	0.02	0.04	YNL104C, YOR108W
anion transmembrane transporter activity	7 of 95 genes, 7.4%	101 of 7166 genes, 1.4%	0.03808	0.0133	0.04	YDR384C, YOR130C, YKL120W, YBR068C, YDR046C, YPL092W, YGR191W
carboxylic acid transmembrane transporter activity	6 of 95 genes, 6.3%	73 of 7166 genes, 1.0%	0.04087	0.01	0.04	YDR384C, YOR130C, YKL120W, YBR068C, YDR046C, YGR191W
organic acid transmembrane transporter activity	6 of 95 genes, 6.3%	75 of 7166 genes, 1.0%	0.04733	0.016	0.08	YDR384C, YOR130C, YKL120W, YBR068C, YDR046C, YGR191W
transmembrane transporter activity	13 of 95 genes, 13.7%	337 of 7166 genes, 4.7%	0.04896	0.0133	0.08	YDR384C, YOR130C, YDR046C, YHL040C, YLL053C, YDR011W, YGR191W, YKL120W, YBR068C, YPL092W, YBR043C, YLL052C, YDR342C
Gene Ontology term - C	Cluster frequency	Genome frequency	Corrected p-value	FDR	FP	Genes annotated to the term
carbamoyl-phosphate synthase complex	2 of 95 genes, 2.1%	2 of 7166 genes, 0.0%	0.01634	0.02	0.02	YOR303W, YJR109C
mitochondrion	30 of 95 genes, 31.6%	1193 of 7166 genes, 16.6%	0.02139	0.02	0.04	YJR111C, YDR384C, YLL013C, YOR130C, YDR046C, YAL062W, YDR035W, YER073W, YMR108W, YKL120W, YKL205W, YDL140C, YLL027W, YJL088W, YDL181W, YOL140W, YDL183C, YNL104C, YGL236C, YDR011W, YOR040W, YGL125W, YGR110W, YER069W, YOR108W, YOL059W, YDL222C, YMR062C, YGL005C, YDR342C
69 downregulated
Gene Ontology term - P	Cluster frequency	Genome frequency	Corrected p-value	FDR	FP	Genes annotated to the term
cellular amino acid biosynthetic process	19 of 69 genes, 27.5%	108 of 7166 genes, 1.5%	3.41e-17	0	0	YOR303W, YOR130C, YDR035W, YGL009C, YMR108W, YBR249C, YJR109C, YJL088W, YOL140W, YHR018C, YNL104C, YEL046C, YIR034C, YBR115C, YOL058W, YGL125W, YER069W, YOR108W, YMR062C
organic acid biosynthetic process	22 of 69 genes, 31.9%	195 of 7166 genes, 2.7%	6.26e-16	0	0	YOR303W, YOR130C, YDR035W, YER073W, YGL009C, YMR108W, YBR249C, YDR127W, YJR109C, YLL027W, YJL088W, YOL140W, YHR018C, YNL104C, YEL046C, YIR034C, YBR115C, YOL058W, YGL125W, YER069W, YOR108W, YMR062C
carboxylic acid biosynthetic process	22 of 69 genes, 31.9%	195 of 7166 genes, 2.7%	6.26e-16	0	0	YOR303W, YOR130C, YDR035W, YER073W, YGL009C, YMR108W, YBR249C, YDR127W, YJR109C, YLL027W, YJL088W, YOL140W, YHR018C, YNL104C, YEL046C, YIR034C, YBR115C, YOL058W, YGL125W, YER069W, YOR108W, YMR062C
alpha-amino acid biosynthetic process	16 of 69 genes, 23.2%	97 of 7166 genes, 1.4%	1.09e-13	0	0	YOR303W, YOR130C, YGL009C, YJR109C, YJL088W, YOL140W, YHR018C, YNL104C, YEL046C, YIR034C, YBR115C, YOL058W, YGL125W, YER069W, YOR108W, YMR062C
arginine biosynthetic process	9 of 69 genes, 13.0%	14 of 7166 genes, 0.2%	2.31e-13	0	0	YOR303W, YOR130C, YER069W, YOL058W, YJR109C, YJL088W, YMR062C, YOL140W, YHR018C
small molecule biosynthetic process	24 of 69 genes, 34.8%	345 of 7166 genes, 4.8%	1e-12	0	0	YOR303W, YOR130C, YDR035W, YER073W, YGL009C, YMR108W, YMR095C, YBR249C, YDR127W, YJR109C, YLL027W, YJL088W, YMR096W, YOL140W, YHR018C, YNL104C, YEL046C, YIR034C, YBR115C, YOL058W, YGL125W, YER069W, YOR108W, YMR062C
arginine metabolic process	9 of 69 genes, 13.0%	18 of 7166 genes, 0.3%	5.46e-12	0	0	YOR303W, YOR130C, YER069W, YOL058W, YJR109C, YJL088W, YMR062C, YOL140W, YHR018C
cellular amino acid metabolic process	19 of 69 genes, 27.5%	215 of 7166 genes, 3.0%	1.87e-11	0	0	YOR303W, YOR130C, YDR035W, YGL009C, YMR108W, YBR249C, YJR109C, YJL088W, YOL140W, YHR018C, YNL104C, YEL046C, YIR034C, YBR115C, YOL058W, YGL125W, YER069W, YOR108W, YMR062C
alpha-amino acid metabolic process	16 of 69 genes, 23.2%	141 of 7166 genes, 2.0%	4.87e-11	0	0	YOR303W, YOR130C, YGL009C, YJR109C, YJL088W, YOL140W, YHR018C, YNL104C, YEL046C, YIR034C, YBR115C, YOL058W, YGL125W, YER069W, YOR108W, YMR062C
carboxylic acid metabolic process	22 of 69 genes, 31.9%	375 of 7166 genes, 5.2%	6.26e-10	0	0	YOR303W, YOR130C, YDR035W, YER073W, YGL009C, YMR108W, YBR249C, YDR127W, YJR109C, YLL027W, YJL088W, YOL140W, YHR018C, YNL104C, YEL046C, YIR034C, YBR115C, YOL058W, YGL125W, YER069W, YOR108W, YMR062C
glutamine family amino acid biosynthetic process	9 of 69 genes, 13.0%	29 of 7166 genes, 0.4%	1.03e-09	0	0	YOR303W, YOR130C, YER069W, YOL058W, YJR109C, YJL088W, YMR062C, YOL140W, YHR018C
oxoacid metabolic process	22 of 69 genes, 31.9%	389 of 7166 genes, 5.4%	1.3e-09	0	0	YOR303W, YOR130C, YDR035W, YER073W, YGL009C, YMR108W, YBR249C, YDR127W, YJR109C, YLL027W, YJL088W, YOL140W, YHR018C, YNL104C, YEL046C, YIR034C, YBR115C, YOL058W, YGL125W, YER069W, YOR108W, YMR062C
organic acid metabolic process	22 of 69 genes, 31.9%	390 of 7166 genes, 5.4%	1.37e-09	0	0	YOR303W, YOR130C, YDR035W, YER073W, YGL009C, YMR108W, YBR249C, YDR127W, YJR109C, YLL027W, YJL088W, YOL140W, YHR018C, YNL104C, YEL046C, YIR034C, YBR115C, YOL058W, YGL125W, YER069W, YOR108W, YMR062C
glutamine family amino acid metabolic process	9 of 69 genes, 13.0%	42 of 7166 genes, 0.6%	4.17e-08	0	0	YOR303W, YOR130C, YER069W, YOL058W, YJR109C, YJL088W, YMR062C, YOL140W, YHR018C
small molecule metabolic process	26 of 69 genes, 37.7%	746 of 7166 genes, 10.4%	4.84e-07	0	0	YOR303W, YOR130C, YDR035W, YER073W, YGL009C, YMR108W, YMR095C, YBR249C, YER024W, YDR127W, YJR109C, YLL027W, YJL088W, YMR096W, YOL140W, YHR018C, YNL104C, YEL046C, YIR034C, YBR115C, YOL058W, YGL125W, YER069W, YOR108W, YOL059W, YMR062C
ornithine metabolic process	5 of 69 genes, 7.2%	9 of 7166 genes, 0.1%	2.53e-06	0	0	YER069W, YJL088W, YMR062C, YOL140W, YHR018C
urea cycle	4 of 69 genes, 5.8%	5 of 7166 genes, 0.1%	1.13e-05	0	0	YOR303W, YOL058W, YJR109C, YJL088W
urea metabolic process	4 of 69 genes, 5.8%	8 of 7166 genes, 0.1%	0.00015	0	0	YOR303W, YOL058W, YJR109C, YJL088W
nitrogen cycle metabolic process	4 of 69 genes, 5.8%	8 of 7166 genes, 0.1%	0.00015	0	0	YOR303W, YOL058W, YJR109C, YJL088W
ornithine biosynthetic process	3 of 69 genes, 4.3%	4 of 7166 genes, 0.1%	0.00098	0	0	YER069W, YMR062C, YOL140W
chorismate biosynthetic process	3 of 69 genes, 4.3%	4 of 7166 genes, 0.1%	0.00098	0	0	YBR249C, YDR127W, YDR035W
chorismate metabolic process	3 of 69 genes, 4.3%	4 of 7166 genes, 0.1%	0.00098	0	0	YBR249C, YDR127W, YDR035W
branched-chain amino acid biosynthetic process	4 of 69 genes, 5.8%	14 of 7166 genes, 0.2%	0.00212	0	0	YNL104C, YOR108W, YGL009C, YMR108W
branched-chain amino acid metabolic process	4 of 69 genes, 5.8%	20 of 7166 genes, 0.3%	0.00984	0.0008	0.02	YNL104C, YOR108W, YGL009C, YMR108W
leucine biosynthetic process	3 of 69 genes, 4.3%	8 of 7166 genes, 0.1%	0.0134	0.0008	0.02	YNL104C, YOR108W, YGL009C
organonitrogen compound biosynthetic process	26 of 69 genes, 37.7%	1262 of 7166 genes, 17.6%	0.01648	0.0008	0.02	YOR303W, YOR130C, YOR204W, YER096W, YDR035W, YDL160C, YGL009C, YMR108W, YMR095C, YBR249C, YJR109C, YLL027W, YOR302W, YJL088W, YMR096W, YOL140W, YHR018C, YNL104C, YEL046C, YIR034C, YBR115C, YOL058W, YGL125W, YER069W, YOR108W, YMR062C
carboxylic acid transport	6 of 69 genes, 8.7%	74 of 7166 genes, 1.0%	0.02052	0.0007	0.02	YDR384C, YOR130C, YKL120W, YBR068C, YDR046C, YGR191W
organic acid transport	6 of 69 genes, 8.7%	75 of 7166 genes, 1.0%	0.02213	0.0007	0.02	YDR384C, YOR130C, YKL120W, YBR068C, YDR046C, YGR191W
arginine biosynthetic process via ornithine	2 of 69 genes, 2.9%	2 of 7166 genes, 0.0%	0.0265	0.0021	0.06	YJL088W, YHR018C
leucine metabolic process	3 of 69 genes, 4.3%	11 of 7166 genes, 0.2%	0.03869	0.0033	0.1	YNL104C, YOR108W, YGL009C
Gene Ontology term - F	Cluster frequency	Genome frequency	Corrected p-value	FDR	FP	Genes annotated to the term
anion transmembrane transporter activity	7 of 69 genes, 10.1%	101 of 7166 genes, 1.4%	0.00425	0.04	0.04	YDR384C, YOR130C, YKL120W, YBR068C, YDR046C, YPL092W, YGR191W
carboxylic acid transmembrane transporter activity	6 of 69 genes, 8.7%	73 of 7166 genes, 1.0%	0.00589	0.02	0.04	YDR384C, YOR130C, YKL120W, YBR068C, YDR046C, YGR191W
organic acid transmembrane transporter activity	6 of 69 genes, 8.7%	75 of 7166 genes, 1.0%	0.00687	0.02	0.06	YDR384C, YOR130C, YKL120W, YBR068C, YDR046C, YGR191W
3-deoxy-7-phosphoheptulonate synthase activity	2 of 69 genes, 2.9%	2 of 7166 genes, 0.0%	0.00822	0.02	0.08	YBR249C, YDR035W
2-isopropylmalate synthase activity	2 of 69 genes, 2.9%	2 of 7166 genes, 0.0%	0.00822	0.016	0.08	YNL104C, YOR108W
organic anion transmembrane transporter activity	6 of 69 genes, 8.7%	86 of 7166 genes, 1.2%	0.01476	0.0167	0.1	YDR384C, YOR130C, YKL120W, YBR068C, YDR046C, YGR191W
acetyl-CoA:L-glutamate N-acetyltransferase activity	2 of 69 genes, 2.9%	3 of 7166 genes, 0.0%	0.02451	0.0257	0.18	YER069W, YMR062C
carbamoyl-phosphate synthase (glutamine-hydrolyzing) activity	2 of 69 genes, 2.9%	3 of 7166 genes, 0.0%	0.02451	0.0225	0.18	YOR303W, YJR109C
Gene Ontology term - C	Cluster frequency	Genome frequency	Corrected p-value	FDR	FP	Genes annotated to the term
mitochondrion	26 of 69 genes, 37.7%	1193 of 7166 genes, 16.6%	0.00155	0	0	YJR111C, YDR384C, YLL013C, YOR130C, YDR046C, YDR035W, YER073W, YMR108W, YKL120W, YKL205W, YDL140C, YLL027W, YJL088W, YOL140W, YDL183C, YNL104C, YGL236C, YDR011W, YGL125W, YGR110W, YER069W, YOR108W, YOL059W, YDL222C, YMR062C, YDR342C
carbamoyl-phosphate synthase complex	2 of 69 genes, 2.9%	2 of 7166 genes, 0.0%	0.00685	0.04	0.08	YOR303W, YJR109C
glutaminase complex	2 of 69 genes, 2.9%	4 of 7166 genes, 0.1%	0.04061	0.06	0.18	YMR096W, YMR095C
27 upregulated
Gene Ontology term - F	Cluster frequency	Genome frequency	Corrected p-value	FDR	FP	Genes annotated to the term
water transmembrane transporter activity	2 of 26 genes, 7.7%	4 of 7166 genes, 0.1%	0.00189	0	0	YLL053C, YLL052C
water channel activity	2 of 26 genes, 7.7%	4 of 7166 genes, 0.1%	0.00189	0	0	YLL053C, YLL052C
substrate-specific channel activity	2 of 26 genes, 7.7%	16 of 7166 genes, 0.2%	0.0368	0.0667	0.2	YLL053C, YLL052C
channel activity	2 of 26 genes, 7.7%	17 of 7166 genes, 0.2%	0.04162	0.07	0.28	YLL053C, YLL052C
passive transmembrane transporter activity	2 of 26 genes, 7.7%	17 of 7166 genes, 0.2%	0.04162	0.056	0.28	YLL053C, YLL052C
air+pH-
Gene Ontology term - P	Cluster frequency	Genome frequency	Corrected p-value	FDR	FP	Genes annotated to the term
arginine biosynthetic process	8 of 271 genes, 3.0%	14 of 7166 genes, 0.2%	7.91e-06	0	0	YER069W, YOL058W, YJR109C, YJL088W, YMR062C, YOL140W, YJL130C, YHR018C
cellular amino acid biosynthetic process	18 of 271 genes, 6.6%	108 of 7166 genes, 1.5%	7.86e-05	0	0	YGL009C, YMR108W, YJR109C, YJL088W, YDL171C, YOL140W, YHR018C, YEL046C, YNL104C, YIR034C, YGL184C, YBR115C, YOL058W, YJL130C, YDL106C, YGL125W, YER069W, YMR062C
alpha-amino acid biosynthetic process	17 of 271 genes, 6.3%	97 of 7166 genes, 1.4%	8.44e-05	0	0	YGL009C, YJR109C, YJL088W, YDL171C, YOL140W, YHR018C, YEL046C, YNL104C, YIR034C, YGL184C, YBR115C, YOL058W, YJL130C, YDL106C, YGL125W, YER069W, YMR062C
arginine metabolic process	8 of 271 genes, 3.0%	18 of 7166 genes, 0.3%	0.0001	0	0	YER069W, YOL058W, YJR109C, YJL088W, YMR062C, YOL140W, YJL130C, YHR018C
organic acid biosynthetic process	22 of 271 genes, 8.1%	168 of 7166 genes, 2.3%	0.00024	0	0	YPL095C, YER073W, YGL009C, YMR108W, YJR109C, YDR127W, YJL088W, YLL027W, YDL171C, YOL140W, YHR018C, YEL046C, YNL104C, YIR034C, YGL184C, YBR115C, YOL058W, YJL130C, YDL106C, YGL125W, YER069W, YMR062C
carboxylic acid biosynthetic process	22 of 271 genes, 8.1%	168 of 7166 genes, 2.3%	0.00024	0	0	YPL095C, YER073W, YGL009C, YMR108W, YJR109C, YDR127W, YJL088W, YLL027W, YDL171C, YOL140W, YHR018C, YEL046C, YNL104C, YIR034C, YGL184C, YBR115C, YOL058W, YJL130C, YDL106C, YGL125W, YER069W, YMR062C
glutamine family amino acid biosynthetic process	9 of 271 genes, 3.3%	29 of 7166 genes, 0.4%	0.0006	0	0	YOL058W, YJL130C, YER069W, YJR109C, YDL171C, YJL088W, YMR062C, YOL140W, YHR018C
ornithine metabolic process	5 of 271 genes, 1.8%	9 of 7166 genes, 0.1%	0.00704	0.0025	0.02	YER069W, YJL088W, YMR062C, YOL140W, YHR018C
urea cycle	4 of 271 genes, 1.5%	5 of 7166 genes, 0.1%	0.00825	0.0022	0.02	YOL058W, YJR109C, YJL088W, YJL130C
glutamine family amino acid metabolic process	9 of 271 genes, 3.3%	42 of 7166 genes, 0.6%	0.01751	0.004	0.04	YOL058W, YJL130C, YER069W, YJR109C, YDL171C, YJL088W, YMR062C, YOL140W, YHR018C
alpha-amino acid metabolic process	17 of 271 genes, 6.3%	141 of 7166 genes, 2.0%	0.01764	0.0036	0.04	YGL009C, YJR109C, YJL088W, YDL171C, YOL140W, YHR018C, YEL046C, YNL104C, YIR034C, YGL184C, YBR115C, YOL058W, YJL130C, YDL106C, YGL125W, YER069W, YMR062C
cellular amino acid metabolic process	21 of 271 genes, 7.7%	215 of 7166 genes, 3.0%	0.04879	0.0233	0.28	YIR017C, YGL009C, YMR108W, YJR109C, YJL088W, YDL171C, YOL140W, YHR018C, YEL046C, YBR145W, YNL104C, YIR034C, YGL184C, YBR115C, YOL058W, YJL130C, YKL029C, YDL106C, YGL125W, YER069W, YMR062C
oxoacid metabolic process	31 of 271 genes, 11.4%	389 of 7166 genes, 5.4%	0.04944	0.0215	0.28	YPL095C, YOR363C, YIR017C, YER073W, YGL009C, YMR272C, YMR108W, YJL198W, YJR109C, YDR127W, YJL088W, YLL027W, YDL171C, YOL140W, YHR018C, YNL104C, YBR145W, YEL046C, YIR034C, YGL184C, YBR115C, YOL058W, YKL029C, YJL130C, YDL106C, YOR040W, YGL125W, YER069W, YMR062C, YKL055C, YOR344C
Gene Ontology term - C	Cluster frequency	Genome frequency	Corrected p-value	FDR	FP	Genes annotated to the term
cell periphery	50 of 271 genes, 18.5%	751 of 7166 genes, 10.5%	0.00849	0	0	YDR384C, YBR069C, YNL318C, YGR191W, YGR189C, YBR068C, YCR045C, YPL092W, YGR152C, YER060W-A, YPL269W, YGR224W, YLL052C, YKR102W, YGL255W, YJL116C, YCL048W, YNR044W, YDR011W, YGR014W, YEL069C, YDR409W, YGL114W, YCR089W, YNL327W, YLR413W, YHR097C, YBR183W, YGL051W, YDL223C, YMR011W, YEL065W, YDR034W-B, YBR129C, YKR093W, YPL032C, YJL198W, YOR337W, YJL078C, YOR009W, YLR121C, YLR120C, YDR510W, YIL011W,…
cell wall	14 of 271 genes, 5.2%	115 of 7166 genes, 1.6%	0.02138	0.03	0.06	YKR102W, YJL116C, YIL011W, YCL048W, YNR044W, YOL154W, YGR189C, YCR045C, YJL078C, YNL327W, YCR089W, YOR009W, YLR121C, YLR120C
fungal-type cell wall	14 of 271 genes, 5.2%	115 of 7166 genes, 1.6%	0.02138	0.02	0.06	YKR102W, YJL116C, YIL011W, YCL048W, YNR044W, YOL154W, YGR189C, YCR045C, YJL078C, YNL327W, YCR089W, YOR009W, YLR121C, YLR120C
external encapsulating structure	14 of 271 genes, 5.2%	115 of 7166 genes, 1.6%	0.02138	0.015	0.06	YKR102W, YJL116C, YIL011W, YCL048W, YNR044W, YOL154W, YGR189C, YCR045C, YJL078C, YNL327W, YCR089W, YOR009W, YLR121C, YLR120C
air-pH+
Gene Ontology term - P	Cluster frequency	Genome frequency	Corrected p-value	FDR	FP	Genes annotated to the term
reproductive process in single-celled organism	15 of 185 genes, 8.1%	153 of 7166 genes, 2.1%	0.00486	0	0	YNL279W, YER096W, YPL130W, YDR402C, YOR255W, YDL227C, YDR146C, YNL204C, YBR040W, YGR152C, YCR045C, YLR307W, YLR341W, YLR213C, YPL016W
biological_process	72 of 185 genes, 38.9%	1831 of 7166 genes, 25.6%	0.02054	0.04	0.08	YGL240W, YOR083W, YOR387C, YHR079C-A, YPL130W, YMR272C, YNL204C, YFL040W, YOL007C, YLR026C, YGR286C, YLR213C, YCL018W, YFL051C, YGR109W-A, YMR286W, YMR070W, YNL199C, YLR030W, YPL103C, YOR178C, YDR317W, YFR032C, YGR273C, YJL144W, YNL042W-B, YMR322C, YMR133W, YPR007C, YBR040W, YJR078W, YJL136W-A, YCR101C, YEL025C, YML087C, YDL159W-A, YLR178C, YDR402C, YBL101W-C, YLL006W-A, YOL144W, YOR072W-B, YBL07…
Gene Ontology term - F	Cluster frequency	Genome frequency	Corrected p-value	FDR	FP	Genes annotated to the term
molecular_function	96 of 185 genes, 51.9%	2630 of 7166 genes, 36.7%	0.00166	0	0	YGL240W, YOR083W, YOR387C, YHR079C-A, YPL130W, YMR272C, YNL204C, YFL040W, YOL007C, YLR026C, YGR286C, YLR213C, YCL018W, YFL051C, YGR109W-A, YMR286W, YMR070W, YNL199C, YLR030W, YPL103C, YOR178C, YDR317W, YFR032C, YGR273C, YJL144W, YNL042W-B, YMR322C, YMR133W, YPR007C, YBR040W, YJR078W, YJL136W-A, YCR101C, YEL025C, YML087C, YDL159W-A, YLR178C, YDR402C, YBL101W-C, YLL006W-A, YOL144W, YOR072W-B, YBL07…
solute:proton symporter activity	7 of 185 genes, 3.8%	40 of 7166 genes, 0.6%	0.00735	0.02	0.04	YFL011W, YFL040W, YLR081W, YDL245C, YHR092C, YBR220C, YJL214W
glucose transmembrane transporter activity	6 of 185 genes, 3.2%	28 of 7166 genes, 0.4%	0.00762	0.0133	0.04	YFL011W, YFL040W, YLR081W, YDL245C, YHR092C, YJL214W
monosaccharide transmembrane transporter activity	6 of 185 genes, 3.2%	28 of 7166 genes, 0.4%	0.00762	0.01	0.04	YFL011W, YFL040W, YLR081W, YDL245C, YHR092C, YJL214W
hexose transmembrane transporter activity	6 of 185 genes, 3.2%	28 of 7166 genes, 0.4%	0.00762	0.008	0.04	YFL011W, YFL040W, YLR081W, YDL245C, YHR092C, YJL214W
sugar transmembrane transporter activity	6 of 185 genes, 3.2%	29 of 7166 genes, 0.4%	0.0094	0.0067	0.04	YFL011W, YFL040W, YLR081W, YDL245C, YHR092C, YJL214W
solute:cation symporter activity	7 of 185 genes, 3.8%	43 of 7166 genes, 0.6%	0.01191	0.0086	0.06	YFL011W, YFL040W, YLR081W, YDL245C, YHR092C, YBR220C, YJL214W
symporter activity	7 of 185 genes, 3.8%	44 of 7166 genes, 0.6%	0.01386	0.0075	0.06	YFL011W, YFL040W, YLR081W, YDL245C, YHR092C, YBR220C, YJL214W
carbohydrate:proton symporter activity	6 of 185 genes, 3.2%	31 of 7166 genes, 0.4%	0.01396	0.0067	0.06	YFL011W, YFL040W, YLR081W, YDL245C, YHR092C, YJL214W
carbohydrate:cation symporter activity	6 of 185 genes, 3.2%	31 of 7166 genes, 0.4%	0.01396	0.006	0.06	YFL011W, YFL040W, YLR081W, YDL245C, YHR092C, YJL214W
carbohydrate transmembrane transporter activity	6 of 185 genes, 3.2%	35 of 7166 genes, 0.5%	0.02825	0.0127	0.14	YFL011W, YFL040W, YLR081W, YDL245C, YHR092C, YJL214W
air-pH-
Gene Ontology term - P	Cluster frequency	Genome frequency	Corrected p-value	FDR	FP	Genes annotated to the term
arginine biosynthetic process	9 of 115 genes, 7.8%	14 of 7166 genes, 0.2%	3.53e-11	0	0	YOR303W, YOR130C, YER069W, YOL058W, YJR109C, YJL088W, YMR062C, YOL140W, YHR018C
glutamine family amino acid biosynthetic process	11 of 115 genes, 9.6%	29 of 7166 genes, 0.4%	1.11e-10	0	0	YOR303W, YOR130C, YOL058W, YAL062W, YLR142W, YER069W, YJR109C, YJL088W, YMR062C, YOL140W, YHR018C
arginine metabolic process	9 of 115 genes, 7.8%	18 of 7166 genes, 0.3%	8.13e-10	0	0	YOR303W, YOR130C, YER069W, YOL058W, YJR109C, YJL088W, YMR062C, YOL140W, YHR018C
cellular amino acid biosynthetic process	16 of 115 genes, 13.9%	108 of 7166 genes, 1.5%	3.66e-09	0	0	YOR303W, YOR130C, YGL184C, YOL058W, YAL062W, YDR035W, YGL009C, YLR142W, YER069W, YPL273W, YJR109C, YOR108W, YJL088W, YMR062C, YOL140W, YHR018C
alpha-amino acid biosynthetic process	15 of 115 genes, 13.0%	97 of 7166 genes, 1.4%	9.04e-09	0	0	YOR303W, YOR130C, YGL184C, YOL058W, YAL062W, YGL009C, YLR142W, YER069W, YPL273W, YJR109C, YOR108W, YJL088W, YMR062C, YOL140W, YHR018C
glutamine family amino acid metabolic process	11 of 115 genes, 9.6%	42 of 7166 genes, 0.6%	1.15e-08	0	0	YOR303W, YOR130C, YOL058W, YAL062W, YLR142W, YER069W, YJR109C, YJL088W, YMR062C, YOL140W, YHR018C
alpha-amino acid metabolic process	17 of 115 genes, 14.8%	141 of 7166 genes, 2.0%	2.33e-08	0	0	YOR303W, YJR130C, YOR130C, YAL062W, YGL009C, YJR078W, YJR109C, YJL088W, YOL140W, YHR018C, YGL184C, YOL058W, YLR142W, YER069W, YPL273W, YOR108W, YMR062C
organic acid biosynthetic process	17 of 115 genes, 14.8%	168 of 7166 genes, 2.3%	3.8e-07	0	0	YOR303W, YOR130C, YGL184C, YOL058W, YAL062W, YER073W, YDR035W, YGL009C, YLR142W, YER069W, YPL273W, YJR109C, YOR108W, YJL088W, YMR062C, YOL140W, YHR018C
carboxylic acid biosynthetic process	17 of 115 genes, 14.8%	168 of 7166 genes, 2.3%	3.8e-07	0	0	YOR303W, YOR130C, YGL184C, YOL058W, YAL062W, YER073W, YDR035W, YGL009C, YLR142W, YER069W, YPL273W, YJR109C, YOR108W, YJL088W, YMR062C, YOL140W, YHR018C
cellular amino acid metabolic process	18 of 115 genes, 15.7%	215 of 7166 genes, 3.0%	2.53e-06	0	0	YOR303W, YJR130C, YOR130C, YAL062W, YDR035W, YGL009C, YJR078W, YJR109C, YJL088W, YOL140W, YHR018C, YGL184C, YOL058W, YLR142W, YER069W, YPL273W, YOR108W, YMR062C
small molecule biosynthetic process	21 of 115 genes, 18.3%	302 of 7166 genes, 4.2%	3.49e-06	0	0	YOR303W, YOR130C, YAL062W, YER073W, YDR035W, YGL009C, YMR095C, YBR256C, YJR109C, YJL088W, YMR096W, YOL140W, YHR018C, YGL184C, YOL058W, YJL153C, YLR142W, YER069W, YPL273W, YOR108W, YMR062C
ornithine metabolic process	5 of 115 genes, 4.3%	9 of 7166 genes, 0.1%	4.28e-05	0	0	YER069W, YJL088W, YMR062C, YOL140W, YHR018C
carboxylic acid transport	10 of 115 genes, 8.7%	74 of 7166 genes, 1.0%	8.5e-05	0	0	YBR069C, YOR130C, YDR046C, YJR152W, YOR348C, YBR068C, YKL120W, YDL210W, YBR147W, YGR243W
organic acid transport	10 of 115 genes, 8.7%	75 of 7166 genes, 1.0%	9.68e-05	0	0	YBR069C, YOR130C, YDR046C, YJR152W, YOR348C, YBR068C, YKL120W, YDL210W, YBR147W, YGR243W
urea cycle	4 of 115 genes, 3.5%	5 of 7166 genes, 0.1%	0.00011	0	0	YOR303W, YOL058W, YJR109C, YJL088W
oxoacid metabolic process	21 of 115 genes, 18.3%	389 of 7166 genes, 5.4%	0.00026	0	0	YOR303W, YPL019C, YJR130C, YOR130C, YAL062W, YER073W, YDR035W, YGL009C, YJR078W, YJR109C, YJL088W, YOL140W, YHR018C, YGL184C, YOL058W, YLR142W, YER069W, YPL273W, YOR108W, YMR062C, YML123C
organic acid metabolic process	21 of 115 genes, 18.3%	390 of 7166 genes, 5.4%	0.00028	0	0	YOR303W, YPL019C, YJR130C, YOR130C, YAL062W, YER073W, YDR035W, YGL009C, YJR078W, YJR109C, YJL088W, YOL140W, YHR018C, YGL184C, YOL058W, YLR142W, YER069W, YPL273W, YOR108W, YMR062C, YML123C
anion transport	13 of 115 genes, 11.3%	168 of 7166 genes, 2.3%	0.00091	0	0	YBR069C, YOR130C, YDR046C, YCR098C, YJR152W, YOR348C, YBR068C, YKL120W, YDL210W, YBR147W, YGR243W, YML123C, YMR058W
urea metabolic process	4 of 115 genes, 3.5%	8 of 7166 genes, 0.1%	0.00153	0	0	YOR303W, YOL058W, YJR109C, YJL088W
nitrogen cycle metabolic process	4 of 115 genes, 3.5%	8 of 7166 genes, 0.1%	0.00153	0	0	YOR303W, YOL058W, YJR109C, YJL088W
amino acid transport	7 of 115 genes, 6.1%	45 of 7166 genes, 0.6%	0.00229	0	0	YBR069C, YOR130C, YOR348C, YBR068C, YDL210W, YDR046C, YBR147W
carboxylic acid metabolic process	19 of 115 genes, 16.5%	375 of 7166 genes, 5.2%	0.00248	0	0	YOR303W, YJR130C, YOR130C, YAL062W, YER073W, YDR035W, YGL009C, YJR078W, YJR109C, YJL088W, YOL140W, YHR018C, YGL184C, YOL058W, YLR142W, YER069W, YPL273W, YOR108W, YMR062C
ion transport	16 of 115 genes, 13.9%	288 of 7166 genes, 4.0%	0.00459	0	0	YDL183C, YBR069C, YOR130C, YDR046C, YCR098C, YLL053C, YJR152W, YOR348C, YBR068C, YKL120W, YDL210W, YBR147W, YLL052C, YGR243W, YML123C, YMR058W
ornithine biosynthetic process	3 of 115 genes, 2.6%	4 of 7166 genes, 0.1%	0.00584	0	0	YER069W, YMR062C, YOL140W
transmembrane transport	16 of 115 genes, 13.9%	294 of 7166 genes, 4.1%	0.00595	0	0	YBR069C, YOR130C, YMR011W, YEL065W, YDR046C, YCR098C, YBR068C, YBR147W, YGR243W, YLL052C, YMR058W, YLL053C, YDL210W, YML123C, YDR342C, YJL214W
organic anion transport	11 of 115 genes, 9.6%	146 of 7166 genes, 2.0%	0.00732	0	0	YBR069C, YOR130C, YDR046C, YCR098C, YJR152W, YOR348C, YBR068C, YKL120W, YDL210W, YBR147W, YGR243W
monocarboxylic acid transport	5 of 115 genes, 4.3%	24 of 7166 genes, 0.3%	0.01192	0	0	YOR348C, YJR152W, YDL210W, YKL120W, YGR243W
small molecule metabolic process	27 of 115 genes, 23.5%	746 of 7166 genes, 10.4%	0.013	0	0	YOR303W, YPL019C, YJR130C, YOR130C, YAL062W, YER073W, YDR035W, YGL009C, YMR095C, YBR256C, YJR078W, YJR109C, YJL088W, YMR096W, YOL140W, YHR018C, YGL184C, YEL039C, YOL058W, YEL021W, YJL153C, YLR142W, YER069W, YPL273W, YOR108W, YMR062C, YML123C
Gene Ontology term - F	Cluster frequency	Genome frequency	Corrected p-value	FDR	FP	Genes annotated to the term
inorganic molecular entity transmembrane transporter activity	18 of 115 genes, 15.7%	242 of 7166 genes, 3.4%	5.53e-06	0	0	YBR069C, YOR130C, YMR011W, YDR046C, YOR348C, YBR068C, YKL120W, YBR147W, YLL052C, YGR243W, YMR058W, YLL053C, YJR152W, YDL210W, YBR220C, YML123C, YDR342C, YJL214W
anion transmembrane transporter activity	12 of 115 genes, 10.4%	101 of 7166 genes, 1.4%	7.34e-06	0	0	YBR069C, YOR130C, YDR046C, YCR098C, YJR152W, YOR348C, YBR068C, YKL120W, YDL210W, YBR147W, YGR243W, YML123C
transmembrane transporter activity	21 of 115 genes, 18.3%	336 of 7166 genes, 4.7%	7.73e-06	0	0	YBR069C, YOR130C, YMR011W, YEL065W, YDR046C, YCR098C, YHL040C, YOR348C, YBR068C, YKL120W, YBR147W, YLL052C, YGR243W, YMR058W, YLL053C, YJR152W, YDL210W, YBR220C, YML123C, YDR342C, YJL214W
organic anion transmembrane transporter activity	11 of 115 genes, 9.6%	86 of 7166 genes, 1.2%	1.24e-05	0	0	YBR069C, YOR130C, YDR046C, YCR098C, YJR152W, YOR348C, YBR068C, YKL120W, YDL210W, YBR147W, YGR243W
carboxylic acid transmembrane transporter activity	10 of 115 genes, 8.7%	73 of 7166 genes, 1.0%	2.53e-05	0	0	YBR069C, YOR130C, YDR046C, YJR152W, YOR348C, YBR068C, YKL120W, YDL210W, YBR147W, YGR243W
organic acid transmembrane transporter activity	10 of 115 genes, 8.7%	75 of 7166 genes, 1.0%	3.29e-05	0	0	YBR069C, YOR130C, YDR046C, YJR152W, YOR348C, YBR068C, YKL120W, YDL210W, YBR147W, YGR243W
ion transmembrane transporter activity	17 of 115 genes, 14.8%	260 of 7166 genes, 3.6%	8.68e-05	0	0	YBR069C, YOR130C, YMR011W, YDR046C, YCR098C, YOR348C, YBR068C, YKL120W, YBR147W, YGR243W, YMR058W, YJR152W, YDL210W, YBR220C, YML123C, YDR342C, YJL214W
transporter activity	21 of 115 genes, 18.3%	405 of 7166 genes, 5.7%	0.00017	0	0	YBR069C, YOR130C, YMR011W, YEL065W, YDR046C, YCR098C, YHL040C, YOR348C, YBR068C, YKL120W, YBR147W, YLL052C, YGR243W, YMR058W, YLL053C, YJR152W, YDL210W, YBR220C, YML123C, YDR342C, YJL214W
amino acid transmembrane transporter activity	7 of 115 genes, 6.1%	42 of 7166 genes, 0.6%	0.00048	0	0	YBR069C, YOR130C, YOR348C, YBR068C, YDL210W, YDR046C, YBR147W
solute:proton symporter activity	6 of 115 genes, 5.2%	40 of 7166 genes, 0.6%	0.0046	0	0	YDL210W, YMR011W, YBR220C, YML123C, YJL214W, YDR342C
solute:cation symporter activity	6 of 115 genes, 5.2%	43 of 7166 genes, 0.6%	0.00703	0.0018	0.02	YDL210W, YMR011W, YBR220C, YML123C, YJL214W, YDR342C
symporter activity	6 of 115 genes, 5.2%	44 of 7166 genes, 0.6%	0.00804	0.0017	0.02	YDL210W, YMR011W, YBR220C, YML123C, YJL214W, YDR342C
Gene Ontology term - C	Cluster frequency	Genome frequency	Corrected p-value	FDR	FP	Genes annotated to the term
plasma membrane	23 of 115 genes, 20.0%	467 of 7166 genes, 6.5%	9.58e-05	0	0	YPL019C, YBR069C, YMR011W, YEL065W, YDR046C, YCR098C, YHL040C, YOR348C, YBR068C, YGR152C, YLR121C, YLL052C, YMR058W, YCR021C, YLL053C, YJR152W, YDL210W, YGR032W, YBR220C, YML123C, YFL014W, YJL214W, YDR342C
integral component of plasma membrane	9 of 115 genes, 7.8%	69 of 7166 genes, 1.0%	0.00012	0	0	YEL065W, YCR098C, YHL040C, YLL053C, YDL210W, YBR220C, YML123C, YLL052C, YMR058W
intrinsic component of plasma membrane	10 of 115 genes, 8.7%	89 of 7166 genes, 1.2%	0.00012	0	0	YEL065W, YCR098C, YHL040C, YLL053C, YDL210W, YLR121C, YBR220C, YML123C, YLL052C, YMR058W
plasma membrane part	11 of 115 genes, 9.6%	129 of 7166 genes, 1.8%	0.00057	0	0	YEL065W, YCR098C, YHL040C, YLL053C, YDL210W, YLR121C, YGR032W, YBR220C, YML123C, YLL052C, YMR058W
cell periphery	28 of 115 genes, 24.3%	751 of 7166 genes, 10.5%	0.00133	0	0	YPL019C, YAR071W, YBR069C, YMR011W, YEL065W, YDR046C, YDR034W-B, YCR098C, YHL040C, YOR348C, YBR068C, YGR152C, YLR121C, YLL052C, YMR058W, YCR021C, YLL053C, YOL154W, YJR152W, YDL210W, YBR093C, YGR032W, YBR220C, YHR097C, YML123C, YFL014W, YJL214W, YDR342C
carbamoyl-phosphate synthase complex	2 of 115 genes, 1.7%	2 of 7166 genes, 0.0%	0.02425	0.0067	0.04	YOR303W, YJR109C
intrinsic component of membrane	30 of 115 genes, 26.1%	981 of 7166 genes, 13.7%	0.02591	0.0057	0.04	YOL084W, YPL019C, YBR069C, YOR130C, YMR011W, YEL065W, YDR046C, YCR098C, YHL040C, YOR348C, YBR068C, YKL120W, YLR121C, YBR147W, YLL052C, YGR243W, YLR026C, YMR058W, YDL183C, YCR021C, YLL053C, YJR152W, YPL057C, YDL210W, YDR366C, YGR032W, YBR220C, YML123C, YJL214W, YDR342C
integral component of membrane	29 of 115 genes, 25.2%	966 of 7166 genes, 13.5%	0.04624	0.01	0.08	YOL084W, YPL019C, YBR069C, YOR130C, YMR011W, YEL065W, YDR046C, YCR098C, YHL040C, YOR348C, YBR068C, YKL120W, YBR147W, YLL052C, YGR243W, YLR026C, YMR058W, YDL183C, YCR021C, YLL053C, YJR152W, YPL057C, YDL210W, YDR366C, YGR032W, YBR220C, YML123C, YJL214W, YDR342C
